# Supplementary material for: Au(i)-Catalyzed hydroarylation of alkenes with N,N-dialkylanilines: a dual gold catalysis concept
Source: Royal Society of Chemistry journal article supplement (doi:10.1039/c8cy01309h), 2018-01-01
Supplement: c8cy01309h1.pdf [file c8cy01309h1.pdf]

## Supporting Information

# Au(I)-Catalyzed Hydroarylation of Alkenes with *N,N*-dialkylanilines : a dual gold catalysis affair

Ibrahim Abdellah, <sup>\*a</sup> Albert Poater, <sup>\*b</sup> Jean-François Lohier,<sup>a</sup> and Annie-Claude Gaumont<sup>\*a</sup>

## Table of Contents

### I. General Remarks

### II. Product characterization

### III. NMR spectra

### IV. Computational data

---

a Dr. Ibrahim Abdellah, Dr. Jean-François Lohier, and Prof. Dr. Annie-Claude Gaumont  
Normandie Univ, ENSICAEN, UNICAEN, CNRS, LCMT, 14000  
Caen, France  
E-mail: ibrahim\_abdellah@hotmail.com ; annie-claude.gaumont@ensicaen.fr

b Dr. Albert Poater  
Institut de Química Computacional i Catàlisi and Departament de Química, Universitat de Girona, c/ Maria Aurèlia Capmany 6, 17003  
Girona, Catalonia, Spain  
E-mail: albert.poater@udg.edu

## I. General Remarks

All reactions were carried out under argon atmosphere and all glassware was flamed before use. The solvents were purified by an Innovative Technology Pure Solv. Device (activated alumina column containing a copper catalyst and molecular sieves) and degassed.

Benzene and 1,2-Dichloroethane were dried under Na metal or K metal and CaH<sub>2</sub> respectively.

Chromatographic purifications were conducted using Merck silica gel Si 60 (40-63  $\mu$ m) and TLC were performed on silica gel 60-F254 plates (0.1 mm) with UV or KMnO<sub>4</sub> detection.

<sup>1</sup>H, <sup>13</sup>C, <sup>31</sup>P NMR spectra were recorded on a BRUKER AVANCE III 400 or 500 spectrometer. <sup>1</sup>H and <sup>13</sup>C NMR chemical shifts  $\delta$  are reported in ppm using the residual peak of chloroform-*d* (7.26 for <sup>1</sup>H NMR; 77.16 ppm for <sup>13</sup>C NMR) or Dichloromethane-*d*<sub>2</sub> (5.32 for <sup>1</sup>H NMR; 55.84 ppm for <sup>13</sup>C NMR) as internal standard. Coupling constants *J* are reported in Hertz (Hz). Abbreviations are used as follow: s = singlet, d = doublet, t = triplet, q = quadruplet, sept = septuplet, m = multiplet, br = broad.

**High Resolution Mass Spectrometry (HRMS)** was performed on a QTOF Micro WATERS spectrometer or on a GC-MS Mate JEOL spectrometer.

**Gas chromatography:** was performed on a Shimadzu-2014

**InfraRed spectra (IR)** were recorded on a Perkin Elmer Spectrum One FTIR spectrometer equipped with an ATR device, and only the strongest or structurally most important peaks are listed.

**Melting points (Mp)** were measured with a Gallenkamp Melting Point Apparatus.

All commercially available compounds were used as received. PPh<sub>3</sub>AuCl was prepared according to the literature procedures.<sup>1</sup>

## II. Product characterization

### Compound 1

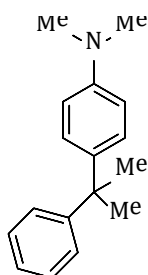

Reaction temperature: 135°C, Yellow oil; 95% yield (isolated)

**<sup>1</sup>H NMR (CD<sub>2</sub>Cl<sub>2</sub>, 400 MHz)** δ 7.28 (d, *J*<sub>HH</sub> = 4.2 Hz, 4H), 7.21-7.16 (m, 1H), 7.13 (d, *J*<sub>HH</sub> = 8.9 Hz, 2H), 6.69 (d, *J*<sub>HH</sub> = 8.9 Hz, 2H), 2.92 (s, 6H), 1.68 (s, 6H).

**<sup>13</sup>CNMR (CD<sub>2</sub>Cl<sub>2</sub>, 100 MHz)** δ 151.9 (C<sub>q</sub>aro), 149.2 (C<sub>q</sub>aro), 139.1 (C<sub>q</sub>aro), 128.2 (CH), 127.6 (CH), 127.1 (CH), 125.7 (CH), 112.7 (CH), 42.3 (C<sub>q</sub>), 40.9 (CH<sub>3</sub>-N), 30.9 (CH<sub>3</sub>).

**IR (ATR, cm<sup>-1</sup>)** 2965, 2871, 2797, 1682, 1614, 1519, 1493, 1443, 1344, 1202, 1166, 816, 763, 698.

**HRMS (ESI)** calcd for C<sub>17</sub>H<sub>22</sub>N [M+H]: 240.1752, found: 240.1756.

### Compound 2

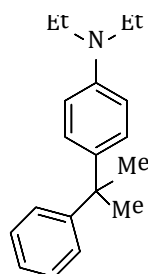

Reaction temperature: 135°C, Yellow oil; 98% yield (isolated)

**<sup>1</sup>H NMR (CDCl<sub>3</sub>, 400 MHz)** δ 7.27-7.22 (m, 4H), 7.16-7.12 (m, 1H), 7.05 (d, *J*<sub>HH</sub> = 8.8 Hz, 2H), 6.58 (d, *J*<sub>HH</sub> = 8.8 Hz, 2H), 3.30 (q, *J*<sub>HH</sub> = 7.0 Hz, 4H), 1.16 (s, 6H), 1.13 (t, *J*<sub>HH</sub> = 7.0 Hz, 6H).

**<sup>13</sup>CNMR (CDCl<sub>3</sub>, 100 MHz)** δ 151.6 (C<sub>q</sub>aro), 145.9 (C<sub>q</sub>aro), 137.6 (C<sub>q</sub>aro), 127.9 (CH), 127.7 (CH), 126.9 (CH), 125.4 (CH), 111.4 (CH), 44.3 (CH<sub>2</sub>-N), 42.0 (C<sub>q</sub>), 31.0 (CH<sub>3</sub>), 12.8 (CH<sub>3</sub>).

**IR (ATR, cm<sup>-1</sup>)** 2966, 2869, 2797, 1612, 1517, 1493, 1445, 1359, 1264, 1201, 813, 762, 698.

**HRMS (ESI)** calcd for C<sub>19</sub>H<sub>26</sub>N [M+H]: 268.2065, found: 268.2077.

## Compound 3

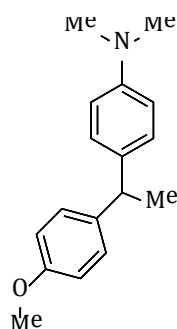

Reaction temperature: 100°C, Yellow oil; 99% yield (isolated)

**$^1\text{H NMR}$  ( $\text{CDCl}_3$ , 400 MHz)**  $\delta$  7.13 (d,  $J_{\text{HH}} = 8.6$  Hz, 2H), 7.08 (d,  $J_{\text{HH}} = 8.6$  Hz, 2H), 6.81 (d,  $J_{\text{HH}} = 8.7$  Hz, 2H), 6.68 (d,  $J_{\text{HH}} = 8.7$  Hz, 2H), 4.02 (q,  $J_{\text{HH}} = 8.7$  Hz, 1H), 3.77 (s, 3H), 2.90 (s, 6H), 1.57 (d,  $J_{\text{HH}} = 7.2$  Hz, 3H).

**$^{13}\text{CNMR}$  ( $\text{CDCl}_3$ , 100 MHz)**  $\delta$  157.7 (C<sub>qaro</sub>), 149.1 (C<sub>qaro</sub>), 139.6 (C<sub>qaro</sub>), 135.1 (C<sub>qaro</sub>), 128.5 (CH), 128.2 (CH), 113.7 (CH), 112.9 (CH), 55.3 (CH<sub>3</sub>-O), 43.0 (CH), 40.9 (CH<sub>3</sub>), 22.4 (CH<sub>3</sub>-N).

**IR (ATR,  $\text{cm}^{-1}$ )** 2930, 2833, 2797, 1611, 1508, 1442, 1341, 1242, 1175, 1162, 1032, 946, 831, 813.

**HRMS (ESI)** calcd for C<sub>17</sub>H<sub>22</sub>NO [M+H]: 256.1701, found: 256.1705.

## Compound 4

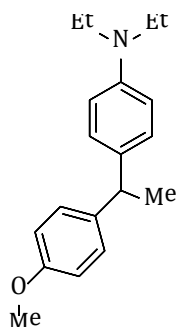

Reaction temperature: 100°C, Yellow oil; 82% yield (isolated)

**$^1\text{H NMR}$  ( $\text{CDCl}_3$ , 400 MHz)**  $\delta$  7.15 (d,  $J_{\text{HH}} = 8.6$  Hz, 2H), 7.05 (d,  $J_{\text{HH}} = 8.6$  Hz, 2H), 6.82 (d,  $J_{\text{HH}} = 8.7$  Hz, 2H), 6.61 (d,  $J_{\text{HH}} = 8.7$  Hz, 2H), 4.01 (q,  $J_{\text{HH}} = 7.2$  Hz, 1H), 3.78 (s, 3H), 3.31 (q,  $J_{\text{HH}} = 7.0$  Hz, 4H), 1.58 (d,  $J_{\text{HH}} = 7.2$  Hz, 3H), 1.30 (t,  $J_{\text{HH}} = 7.0$  Hz, 6H)

**$^{13}\text{CNMR}$  ( $\text{CDCl}_3$ , 100 MHz)**  $\delta$  157.7 (C<sub>qaro</sub>), 146.2 (C<sub>qaro</sub>), 139.7 (C<sub>qaro</sub>), 133.7 (C<sub>qaro</sub>), 128.5 (CH), 128.3 (CH), 113.7 (CH), 111.9 (CH), 55.3 (CH<sub>3</sub>-O), 44.4 (CH<sub>2</sub>-N), 43.0 (CH), 22.4 (CH<sub>3</sub>), 12.7 (CH<sub>3</sub>).

**IR (ATR, cm<sup>-1</sup>)** 2965, 2930, 2870, 1610, 1508, 1463, 1372, 1354, 1242, 1176, 1033, 831, 811.

**HRMS (ESI)** calcd for C<sub>19</sub>H<sub>26</sub>NO [M+H]: 284.2014, found: 284.2012.

### Compound 5

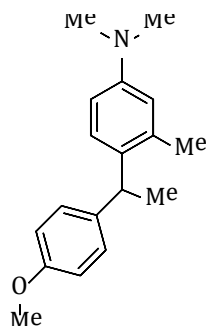

Reaction temperature: 100°C, white oil; 78% yield (isolated)

**<sup>1</sup>H NMR (CDCl<sub>3</sub>, 400 MHz)** δ 7.13 (d, *J*<sub>HH</sub> = 8.5 Hz, 1H), 7.08 (d, *J*<sub>HH</sub> = 8.6 Hz, 2H), 6.80 (d, *J*<sub>HH</sub> = 8.6 Hz, 2H), 6.61 (dd, *J*<sub>HH</sub> = 2.6 Hz, *J*<sub>HH</sub> = 8.5 Hz, 1H), 6.56 (d, *J*<sub>HH</sub> = 2.6 Hz, 1H), 4.19 (q, *J*<sub>HH</sub> = 7.1 Hz, 1H), 3.77 (s, 3H), 2.92 (s, 6H), 2.20 (s, 3H), 1.56 (d, *J*<sub>HH</sub> = 7.1 Hz, 3H).

**<sup>13</sup>CNMR (CDCl<sub>3</sub>, 100 MHz)** δ 157.6 (C<sub>q</sub>aro), 149.1 (C<sub>q</sub>aro), 139.4 (C<sub>q</sub>aro), 136.7 (C<sub>q</sub>aro), 132.9 (C<sub>q</sub>aro), 128.6 (CH), 127.3 (CH), 115.1 (CH), 113.7 (CH), 110.6 (CH), 55.3 (CH<sub>3</sub>-O), 40.9 (CH<sub>3</sub>-N), 39.5 (CH), 22.6 (CH<sub>3</sub>), 20.3 (CH<sub>3</sub>).

**IR (ATR, cm<sup>-1</sup>)** 2961, 2929, 2833, 1609, 1506, 1442, 1348, 1241, 1175, 1032, 1009, 829, 803.

**HRMS (ESI)** calcd for C<sub>18</sub>H<sub>24</sub>NO [M+H]: 270.1858, found: 270.1861.

### Compound 6

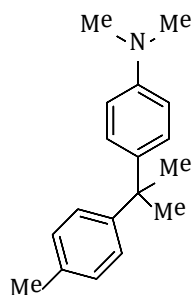

Reaction temperature: 100°C, Yellow oil; 96% yield (isolated)

**<sup>1</sup>H NMR (CDCl<sub>3</sub>, 400 MHz)** δ 7.14-7.05 (m, 6H), 6.66 (d, *J*<sub>HH</sub> = 8.8 Hz, 2H), 2.91 (s, 6H), 2.91 (s, 6H), 2.30 (s, 3H), 1.63 (s, 6H).

**<sup>13</sup>CNMR (CDCl<sub>3</sub>, 100 MHz)** δ 148.6 (C<sub>q</sub>aro), 148.5 (C<sub>q</sub>aro), 139.1 (C<sub>q</sub>aro), 134.8 (C<sub>q</sub>aro), 128.7 (CH), 127.5 (CH), 126.8 (CH), 112.4 (CH), 40.8 (CH<sub>3</sub>-N), 31.0 (CH), 21.0 (CH<sub>3</sub>).

**IR (ATR,  $\text{cm}^{-1}$ )** 2964, 2870, 2796, 1613, 1518, 1443, 1344, 1202, 1166, 947, 814.

**HRMS (ESI)** calcd for  $\text{C}_{18}\text{H}_{24}\text{N}$   $[\text{M}+\text{H}]$ : 254.1909, found: 254.1919.

## Compound 7

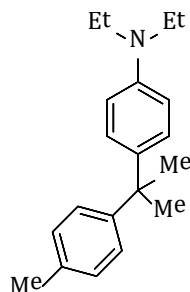

Reaction temperature: 100°C, Yellow oil; 79% yield (isolated)

**$^1\text{H}$  NMR ( $\text{CDCl}_3$ , 400 MHz)**  $\delta$  7.15 (d,  $J_{\text{HH}} = 8.2$  Hz, 2H), 7.06 (d,  $J_{\text{HH}} = 8.8$  Hz, 4H), 6.58 (d,  $J_{\text{HH}} = 8.8$  Hz, 2H), 3.31 (q,  $J_{\text{HH}} = 7.0$  Hz, 4H), 2.30 (s, 3H), 1.60 (s, 6H), 1.13 (t,  $J_{\text{HH}} = 7.0$  Hz, 6H).

**$^{13}\text{C}$  NMR ( $\text{CDCl}_3$ , 100 MHz)**  $\delta$  148.6 ( $\text{C}_{\text{qaro}}$ ), 145.5 ( $\text{C}_{\text{qaro}}$ ), 137.7 ( $\text{C}_{\text{qaro}}$ ), 134.8 ( $\text{C}_{\text{qaro}}$ ), 128.7 (CH), 127.7 (CH), 126.8 (CH), 111.4 (CH), 44.4 ( $\text{CH}_2\text{-N}$ ), 41.7 ( $\text{C}_{\text{q}}$ ), 31.1 ( $\text{CH}_3$ ), 21.0 ( $\text{CH}_3$ ), 12.8 ( $\text{CH}_3$ ).

**IR (ATR,  $\text{cm}^{-1}$ )** 2965, 2927, 2869, 1611, 1515, 1373, 1358, 1264, 1201, 1076, 814.

**HRMS (ESI)** calcd for  $\text{C}_{20}\text{H}_{28}\text{N}$   $[\text{M}+\text{H}]$ : 282.2222, found: 282.2216.

## Compound 8

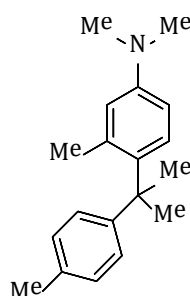

Reaction temperature: 100°C, Yellow oil; 84% yield (isolated)

**$^1\text{H}$  NMR ( $\text{C}_6\text{D}_6$ , 400 MHz)**  $\delta$  7.51 (d,  $J_{\text{HH}} = 8.6$  Hz, 1H), 7.19 (d,  $J_{\text{HH}} = 8.0$  Hz, 2H), 6.98 (d,  $J_{\text{HH}} = 8.0$  Hz, 2H), 6.63 (dd,  $J_{\text{HH}} = 2.8$  Hz,  $J_{\text{HH}} = 8.6$  Hz, 1H), 6.51 (d,  $J_{\text{HH}} = 2.8$  Hz, 1H), 2.59 (s, 6H), 2.13 (s, 3H), 1.92 (s, 3H), 1.67 (s, 6H).

**$^{13}\text{C}$  NMR ( $\text{C}_6\text{D}_6$ , 100 MHz)**  $\delta$  149.6 ( $\text{C}_{\text{qaro}}$ ), 149.4 ( $\text{C}_{\text{qaro}}$ ), 137.5 ( $\text{C}_{\text{qaro}}$ ), 136.5 ( $\text{C}_{\text{qaro}}$ ), 134.5 ( $\text{C}_{\text{qaro}}$ ), 129.2 (CH), 127.1 (CH), 126.3 (CH), 117.7 (CH), 110.4 (CH), 42.6 ( $\text{C}_{\text{q}}$ ), 40.5 ( $\text{CH}_3\text{-N}$ ), 31.5 ( $\text{CH}_3$ ), 22.6 ( $\text{CH}_3$ ), 20.9 ( $\text{CH}_3$ ).

**IR (ATR, cm<sup>-1</sup>)** 2964, 2870, 2795, 1609, 1506, 1349, 1290, 1153, 1014, 841, 814, 799.

**HRMS (ESI)** calcd for C<sub>19</sub>H<sub>26</sub>N [M+H]: 268.2065, found: 268.2067.

## Compound 9

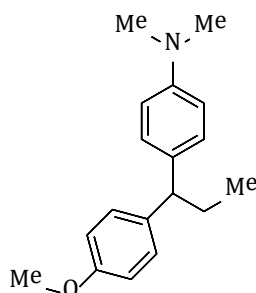

Reaction temperature: 135°C, Yellow oil; 79% yield (isolated)

**<sup>1</sup>H NMR (CDCl<sub>3</sub>, 500 MHz)** δ 7.05 (d, *J*<sub>HH</sub> = 8.6 Hz, 2H), 7.00 (d, *J*<sub>HH</sub> = 8.6 Hz, 2H), 6.72 (d, *J*<sub>HH</sub> = 8.7 Hz, 2H), 6.59 (d, *J*<sub>HH</sub> = 8.8 Hz, 2H), 3.68 (s, 6H), 3.57 (t, *J*<sub>HH</sub> = 7.8 Hz, 1H), 2.81 (s, 6H), 1.92 (qd, *J*<sub>HH</sub> = 1.9 Hz, *J*<sub>HH</sub> = 7.7 Hz, 2H), 0.80 (t, *J*<sub>HH</sub> = 7.3 Hz, 3H),

**<sup>13</sup>CNMR (CDCl<sub>3</sub>, 125 MHz)** δ 157.7 (C<sub>q</sub>aro), 149.1 (C<sub>q</sub>aro), 138.3 (C<sub>q</sub>aro), 133.9 (C<sub>q</sub>aro), 128.8 (CH), 128.5 (CH), 113.7 (CH), 112.9 (CH), 55.3 (CH<sub>3</sub>-O), 51.5 (CH), 40.8 (CH<sub>3</sub>-N), 29.0 (CH<sub>2</sub>), 13.0 (CH<sub>3</sub>).

**IR (ATR, cm<sup>-1</sup>)** 2957, 2930, 2871, 1610, 1508, 1441, 1343, 1244, 1175, 1035, 947, 806.

**HRMS (ESI)** calcd for C<sub>18</sub>H<sub>24</sub>NO [M+H]: 270.1858, found: 270.1871.

## Compound 10

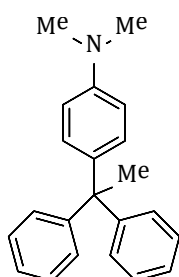

Reaction temperature: 145°C, white solid; m.p. 77-79°; 90% yield (isolated)

**<sup>1</sup>H NMR (CDCl<sub>3</sub>, 400 MHz)** δ 7.29-7.26 (m, 4H), 7.28-7.19 (m, 2H), 7.15-7.13 (m, 4H), 6.98 (d, *J*<sub>HH</sub> = 8.9 Hz, 2H), 6.68 (d, *J*<sub>HH</sub> = 8.7 Hz, 2H), 2.95 (s, 6H), 2.18 (s, 3H).

**<sup>13</sup>CNMR (CDCl<sub>3</sub>, 100 MHz)** δ 149.9 (C<sub>q</sub>aro), 148.6 (C<sub>q</sub>aro), 137.2 (C<sub>q</sub>aro), 129.5 (CH), 128.9 (CH), 127.9 (CH), 125.8 (CH), 112.1 (CH), 51.8 (C<sub>q</sub>), 40.8 (CH<sub>3</sub>-N), 30.6 (CH<sub>3</sub>).

**IR (ATR, cm<sup>-1</sup>)** 3050, 2975, 2795, 1609, 1517, 1442, 1346, 1202, 1125, 1024, 811, 758, 701.

HRMS (ESI) calcd for C<sub>22</sub>H<sub>24</sub>N [M+H]: 302.1909, found: 302.1917.

### X-Ray Crystal Structure of **10**

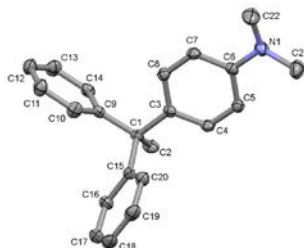

Single crystals of **10** suitable for X-ray crystallographic analysis were obtained by slow evaporation of CH<sub>2</sub>Cl<sub>2</sub> solution. X-ray diffraction experiments for monocrystal of **10** were performed at 150 K with graphite-monochromatized Mo K $\alpha$  radiation ( $\lambda = 0.71073$  Å) on a Bruker–Nonius Kappa CCD area detector diffractometer. Formula C<sub>22</sub>H<sub>23</sub>N, formula weight 301.41, crystal system triclinic, space group *P*-1,  $a = 9.7438(15)$  Å,  $b = 9.9224(16)$  Å,  $c = 10.9840(19)$  Å,  $\alpha = 64.086(6)^\circ$ ,  $\beta = 78.354(7)^\circ$ ,  $\gamma = 63.503(6)^\circ$ ,  $V = 854.8(2)$  Å<sup>3</sup>,  $Z = 2$ , calculated density = 1.171 g/cm<sup>3</sup>,  $\mu = 0.067$  mm<sup>-1</sup>,  $R_{\text{int}} = 0.0404$ ,  $R[F^2 > 2\sigma(F^2)] = 0.0778$ ,  $wR(F^2) = 0.2795$ . Selected bond lengths (Å), angles (deg) and dihedral angles (deg): C1–C3 1.536(4), C1–C2 1.548(4), C1–C9 1.529(4), C1–C15 1.541(4), C3–C1–C9 110.4(2), C3–C1–C15 110.8(2), C9–C1–C15 108.2(2), C3–C1–C2 107.7(2), C9–C1–C2 110.7(2), C15–C1–C2 109.0(2). Program(s) used to solve structure: SHELXS97. Program(s) used to refine structure: SHELXL–2014. Software used to prepare material for publication: SHELXTL. CCDC 1835022 contains the supplementary crystallographic data for this paper. These data can be obtained free of charge from The Cambridge Crystallographic Data Center via [www.ccdc.cam.ac.uk/data\\_request/cif](http://www.ccdc.cam.ac.uk/data_request/cif).

### Compound **11**

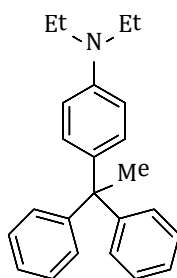

Reaction temperature: 145°C, white solid; m.p. 78–80°; 74% yield (isolated)



**<sup>1</sup>H NMR (CDCl<sub>3</sub>, 400 MHz)** δ 7.27-7.24 (m, 4H), 7.20-7.17 (m, 2H), 7.14-7.12 (m, 4H), 6.91 (d, *J*<sub>HH</sub> = 8.9Hz, 2H), 6.58 (d, *J*<sub>HH</sub> = 8.7Hz, 2H), 3.33 (q, *J*<sub>HH</sub> = 7.0Hz, 4H), 2.16 (s, 3H), 1.16 (t, *J*<sub>HH</sub> = 7.0Hz, 6H).

**<sup>13</sup>CNMR (CDCl<sub>3</sub>, 100 MHz)** δ 150.0 (C<sub>q</sub>aro), 145.9 (C<sub>q</sub>aro), 135.7 (C<sub>q</sub>aro), 129.6 (CH), 128.8 (CH), 127.8 (CH), 125.7 (CH), 111.1 (CH), 51.7 (C<sub>q</sub>), 44.3 (CH<sub>2</sub>-N), 30.6 (CH<sub>3</sub>), 12.8 (CH<sub>3</sub>).

**IR (ATR, cm<sup>-1</sup>)** 2968, 2928, 2889, 1607, 1516, 1443, 1373, 1268, 1200, 1153, 1025, 803, 757, 699.

**HRMS (ESI)** calcd for C<sub>24</sub>H<sub>28</sub>N [M+H]: 330.2222, found: 330.2213.

### X-Ray Crystal Structure of **11**

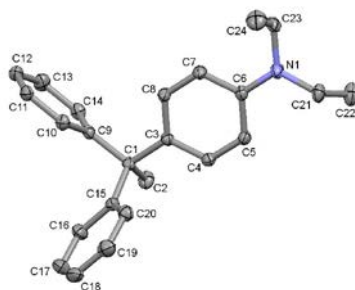

Single crystals of **11** suitable for X-ray crystallographic analysis were obtained by slow evaporation of CH<sub>2</sub>Cl<sub>2</sub> solution. X-ray diffraction experiments for monocrystal of **11** were performed at 150 K with graphite-monochromatized Mo K<sub>α</sub> radiation ( $\lambda = 0.71073$  Å) on a Bruker–Nonius Kappa CCD area detector diffractometer. Formula C<sub>24</sub>H<sub>27</sub>N, formula weight 329.46, crystal system triclinic, space group P-1, *a* = 8.3046(2) Å, *b* = 10.7954(2) Å, *c* = 12.0469(2) Å,  $\alpha = 109.6395(9)^\circ$ ,  $\beta = 100.9597(8)^\circ$ ,  $\gamma = 104.3515(9)^\circ$ , *V* = 940.16(3) Å<sup>3</sup>, *Z* = 2, calculated density = 1.164 g/cm<sup>3</sup>,  $\mu = 0.066$  mm<sup>-1</sup>, *R*<sub>int</sub> = 0.0277, *R*[*F*<sub>2</sub> > 2 $\sigma$ (*F*<sub>2</sub>)] = 0.0456, *wR*(*F*<sub>2</sub>) = 0.1296. Selected bond lengths (Å), angles (deg) and dihedral angles (deg): C1-C3 1.5403(12), C1-C2 1.5492(13), C1-C9 1.5413(12), C1-C15 1.5438(13), C3-C1-C9 109.99(7), C3-C1-C15 112.51(7), C9-C1-C15 106.69(7), C3-C1-C2 107.70(7), C9-C1-C2 110.90(8), C15-C1-C2 109.09(7). Program(s) used to solve structure: SHELXS97. Program(s) used to refine structure: SHELXL-2014. Software used to prepare material for publication: SHELXTL. CCDC 1835023 contains the supplementary crystallographic data for this paper. These data can be obtained free of charge from The Cambridge Crystallographic Data Center via [www.ccdc.cam.ac.uk/data\\_request/cif](http://www.ccdc.cam.ac.uk/data_request/cif).

## Compound 12

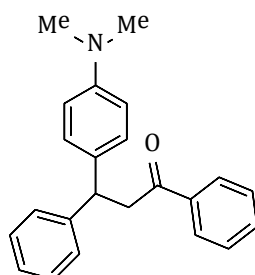

Reaction temperature: 145°C, yellow oil; 34% yield (isolated)

**<sup>1</sup>H NMR (CDCl<sub>3</sub>, 400 MHz)** δ 7.93-7.91 (m, 2H), 7.53 (t,  $J_{\text{HH}} = 7.3\text{Hz}$ , 1H), 7.44-7.40 (m, 2H), 7.25-7.24 (m, 4H), 7.17-7.11 (m, 3H), 6.65 (d,  $J_{\text{HH}} = 8.7\text{Hz}$ , 1H), 4.73 (q,  $J_{\text{HH}} = 7.3\text{Hz}$ , 1H), 2.80 (s, 6H), 3.69 (d,  $J_{\text{HH}} = 7.3\text{Hz}$ , 2H), 2.80 (s, 3H).

**<sup>13</sup>CNMR (CDCl<sub>3</sub>, 100 MHz)** δ 198.5 (CO), 149.3 (C<sub>q</sub>aro), 145.0 (C<sub>q</sub>aro), 137.3 (C<sub>q</sub>aro), 133.1 (CH), 132.3 (CH), 128.7 (CH), 128.6 (CH), 128.5 (CH), 128.2 (CH), 127.9 (CH), 126.2 (CH), 112.9 (CH), 45.2 (CH), 45.1 (CH<sub>2</sub>), 40.7 (CH<sub>3</sub>-N).

**IR (ATR, cm<sup>-1</sup>)** 3059, 3026, 2888, 2798, 1682, 1613, 1518, 1447, 1344, 1202, 1161, 981, 816, 747, 689.

**HRMS (ESI)** calcd for C<sub>23</sub>H<sub>24</sub>NO [M+H]: 330.1858, found: 330.1861.

### III. NMR Spectra

#### Compound 1

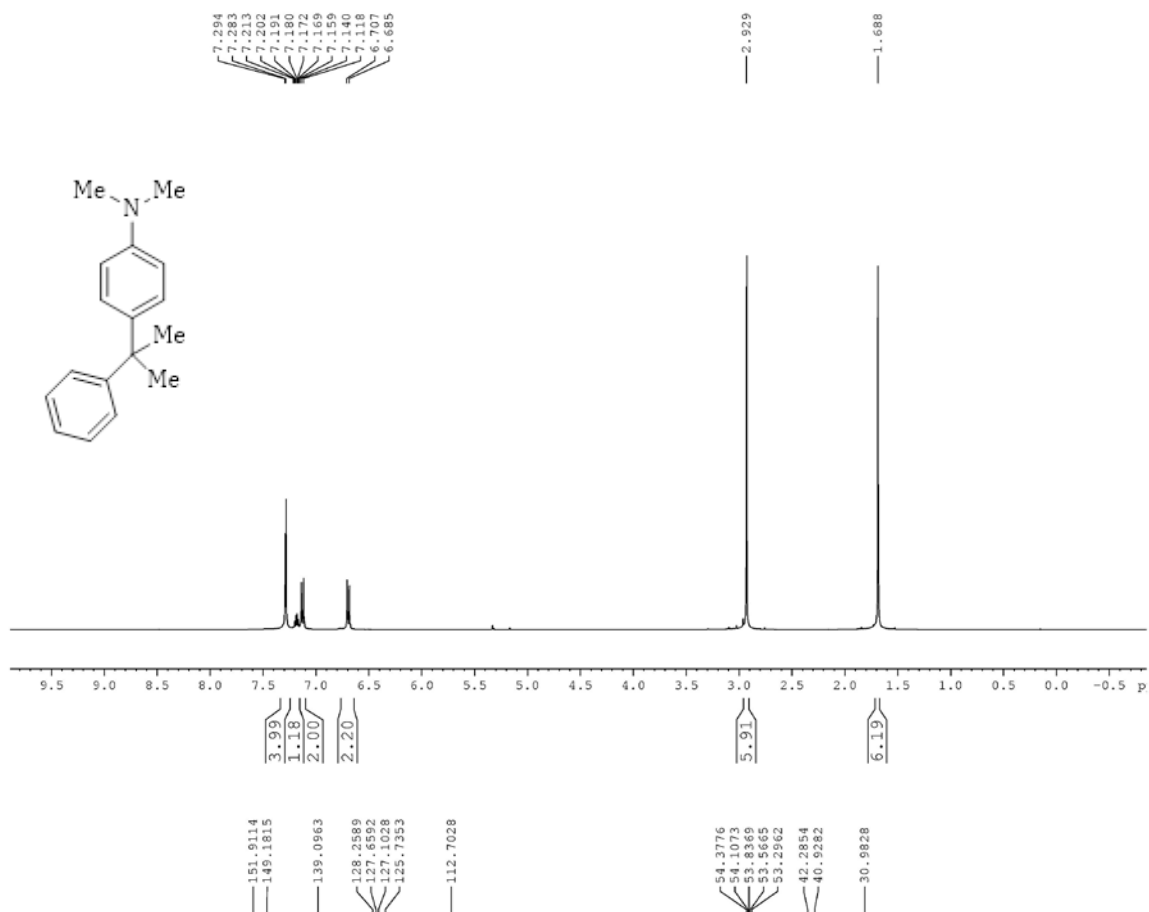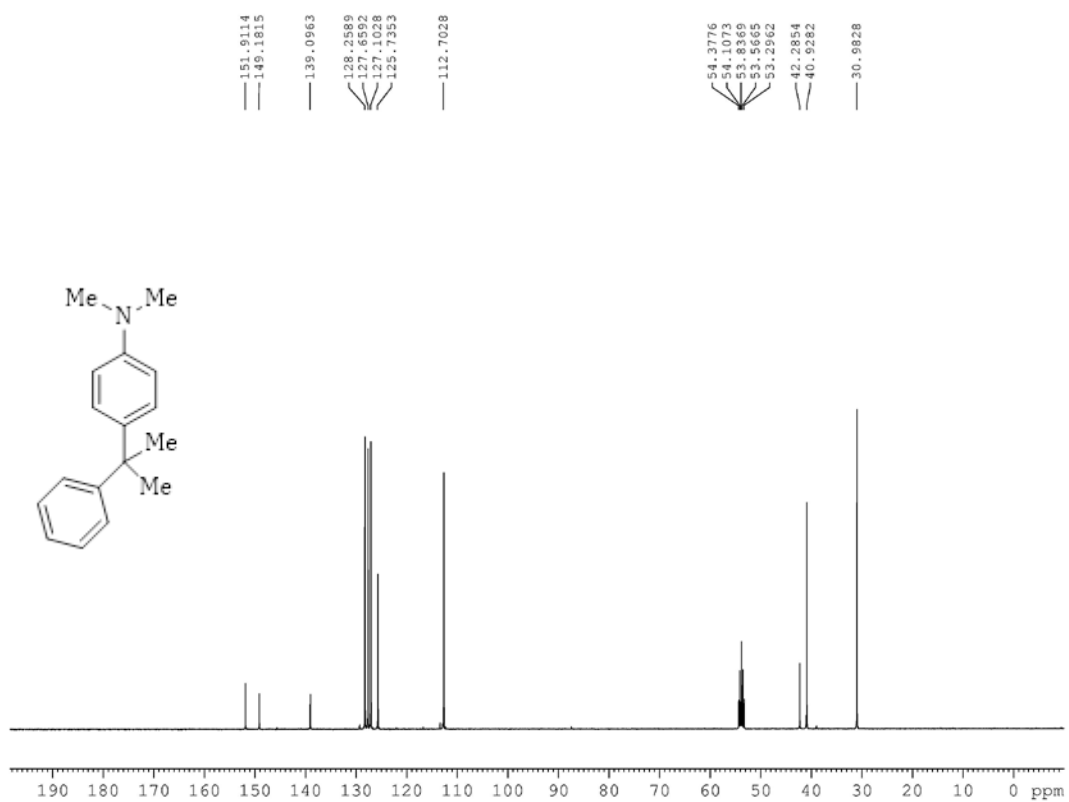

# Compound 2

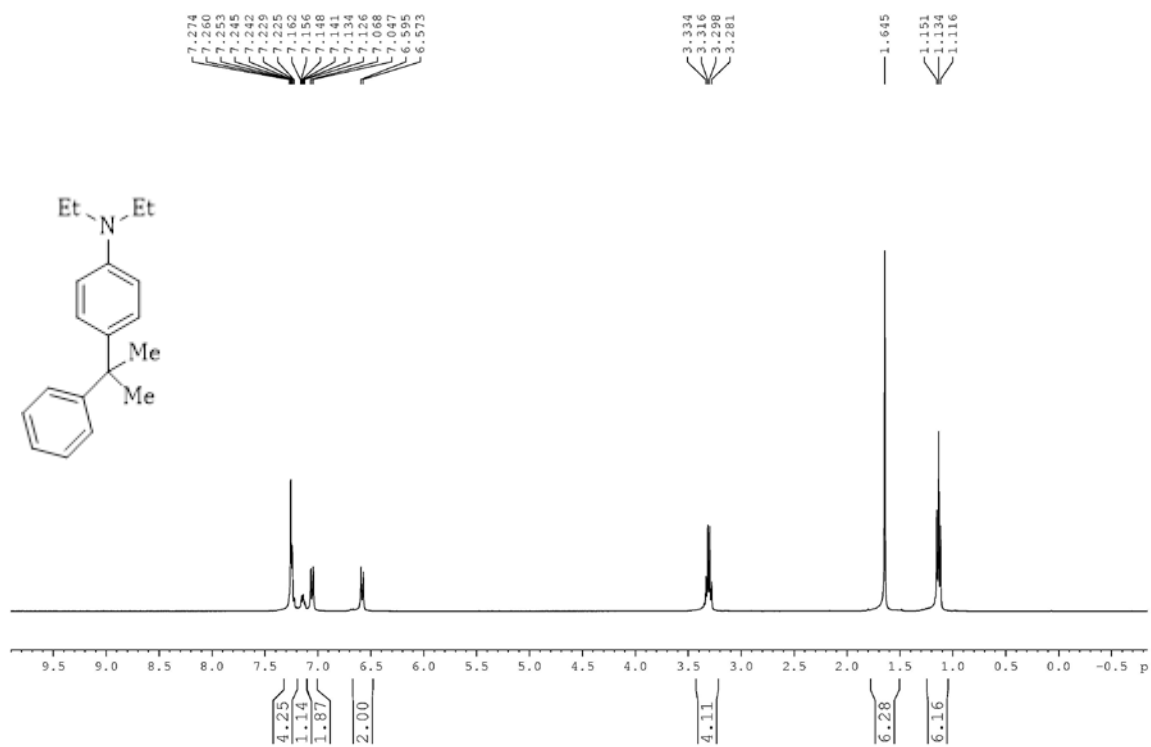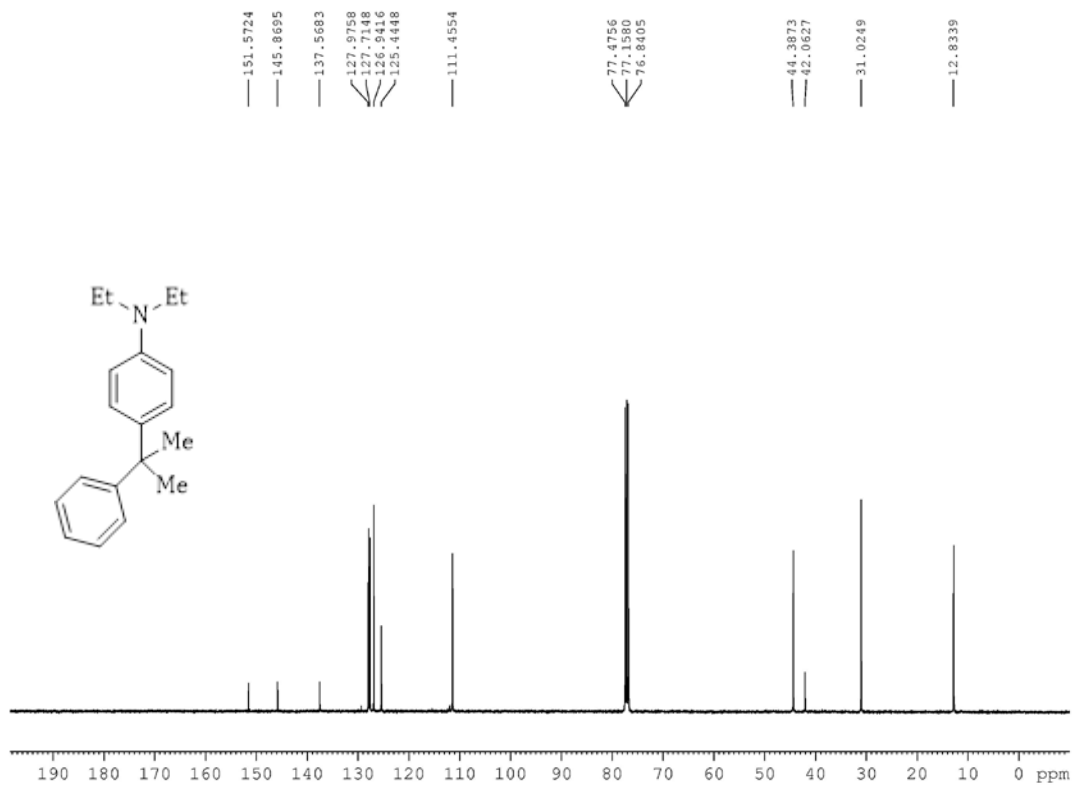

# Compound 3

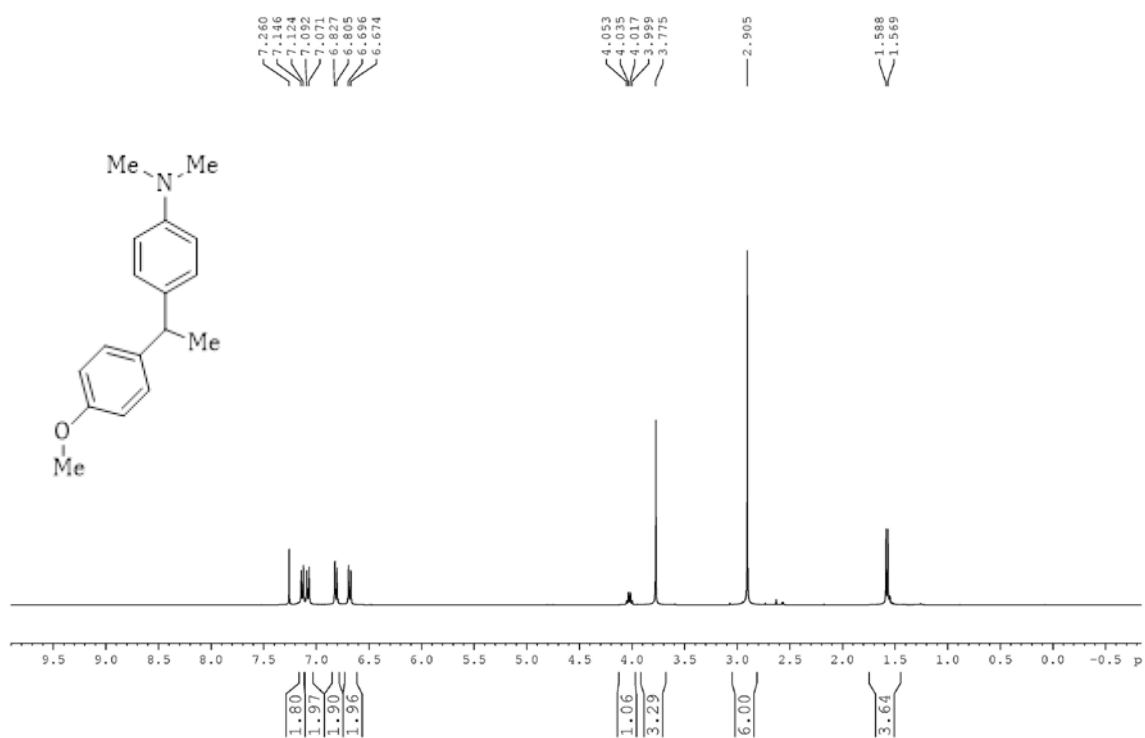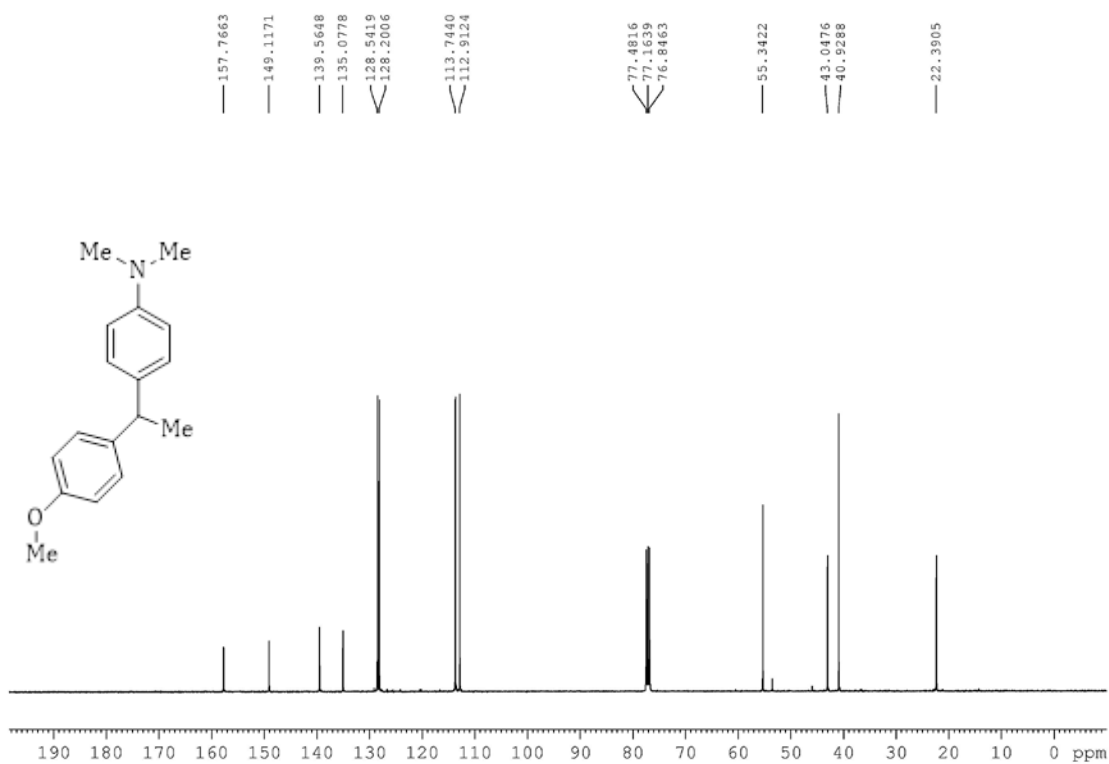

# Compound 4

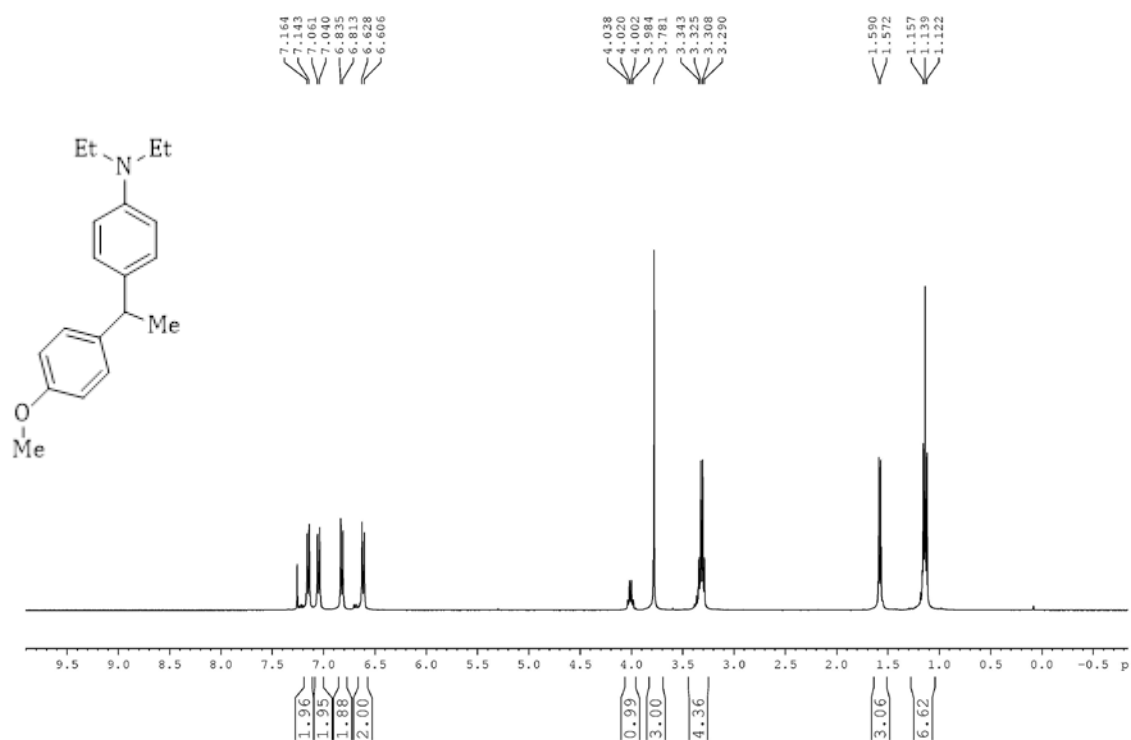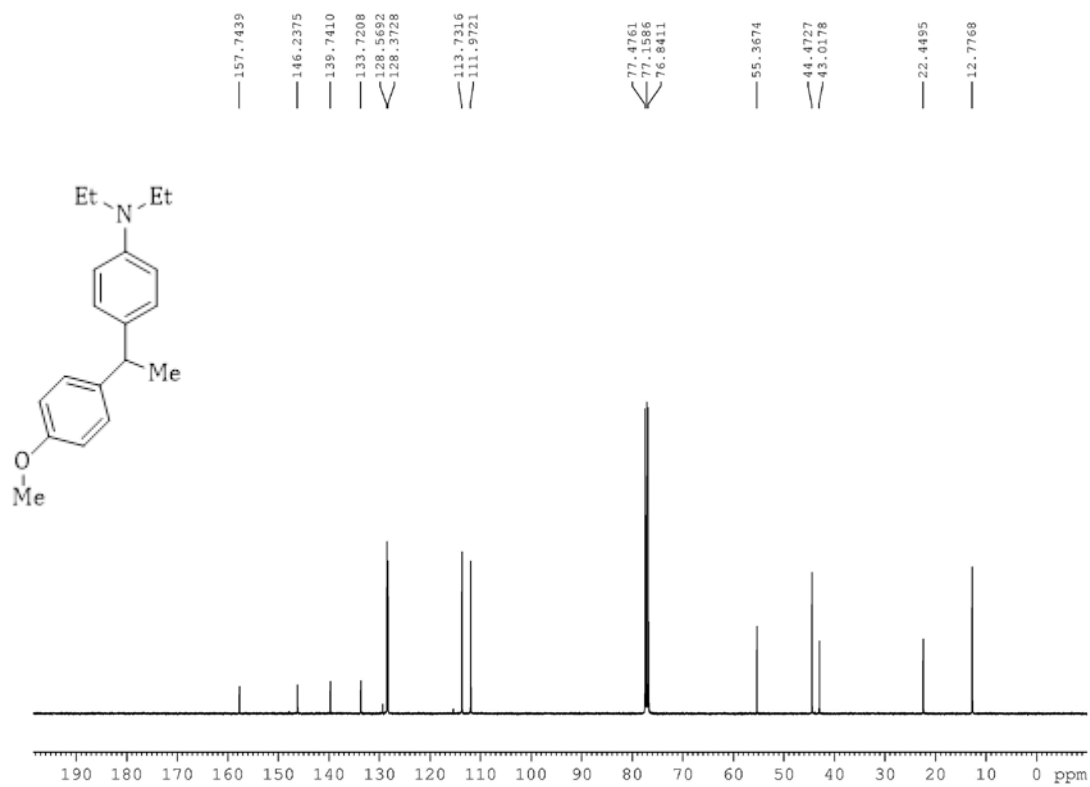

# Compound 5

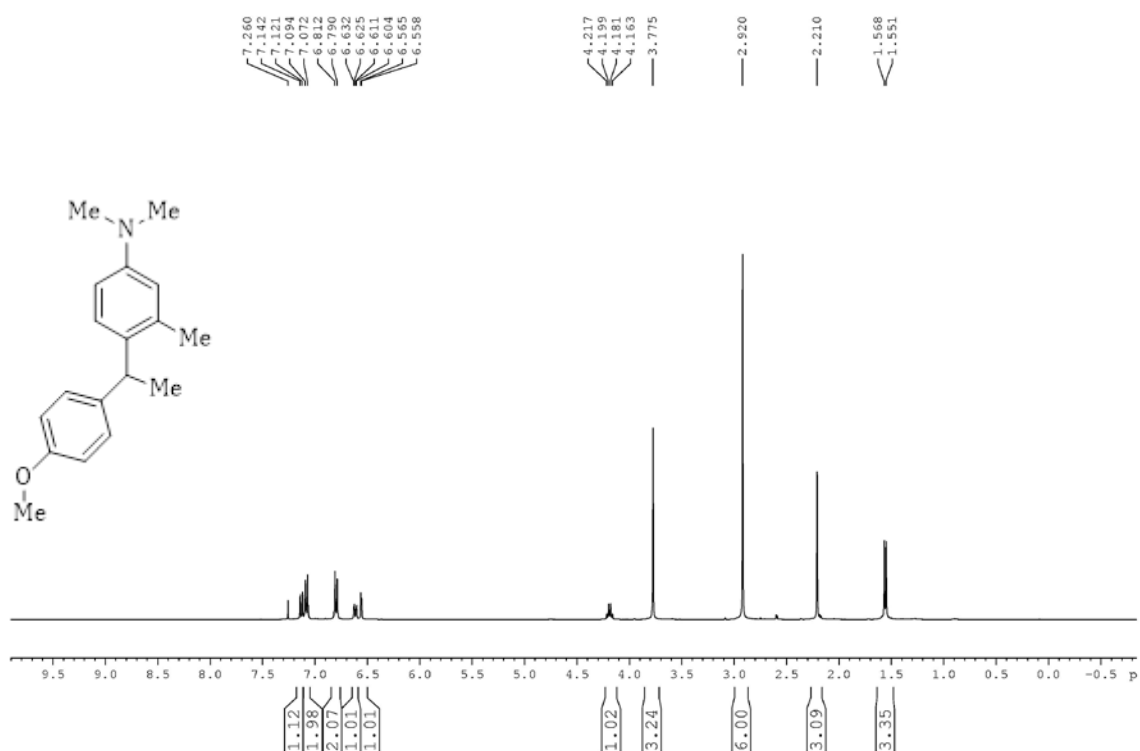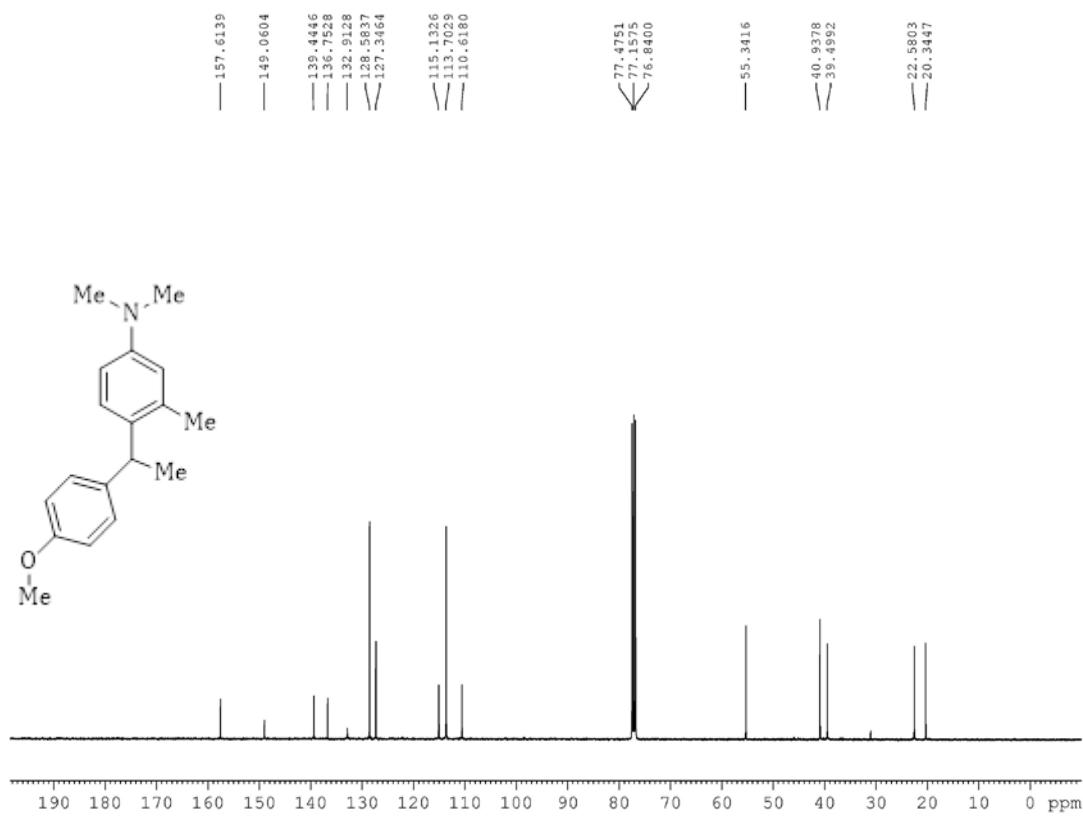

# Compound 6

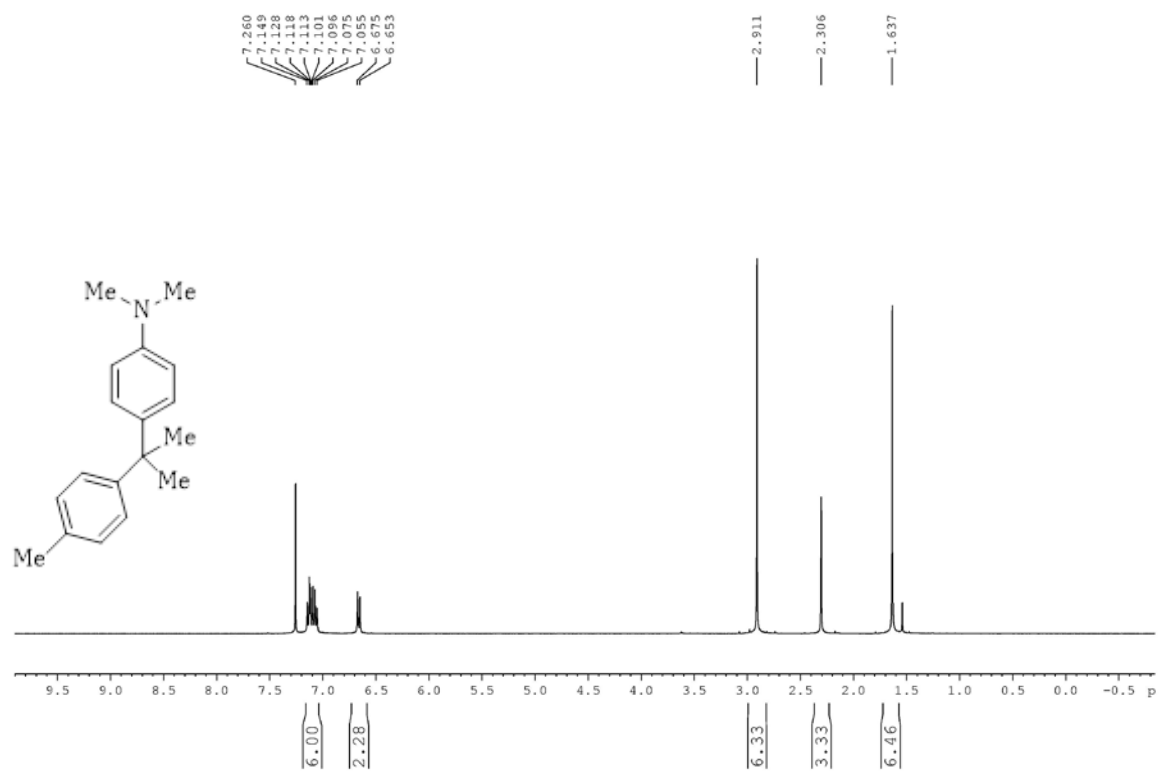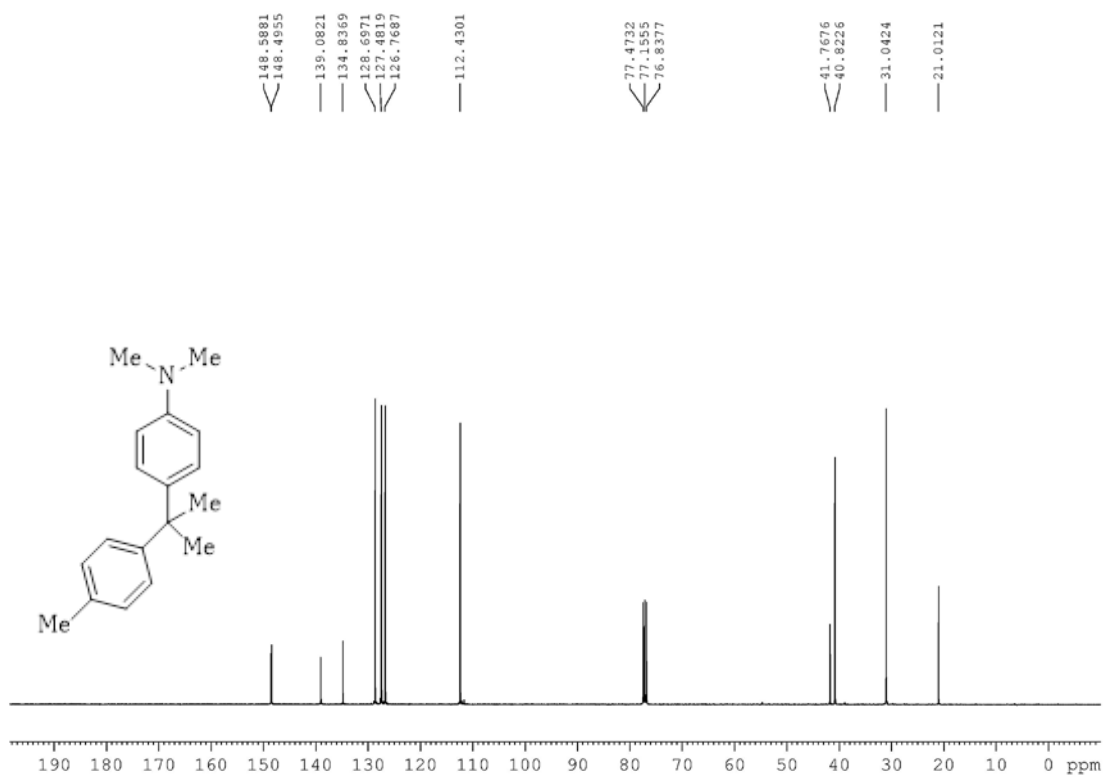



# Compound 7

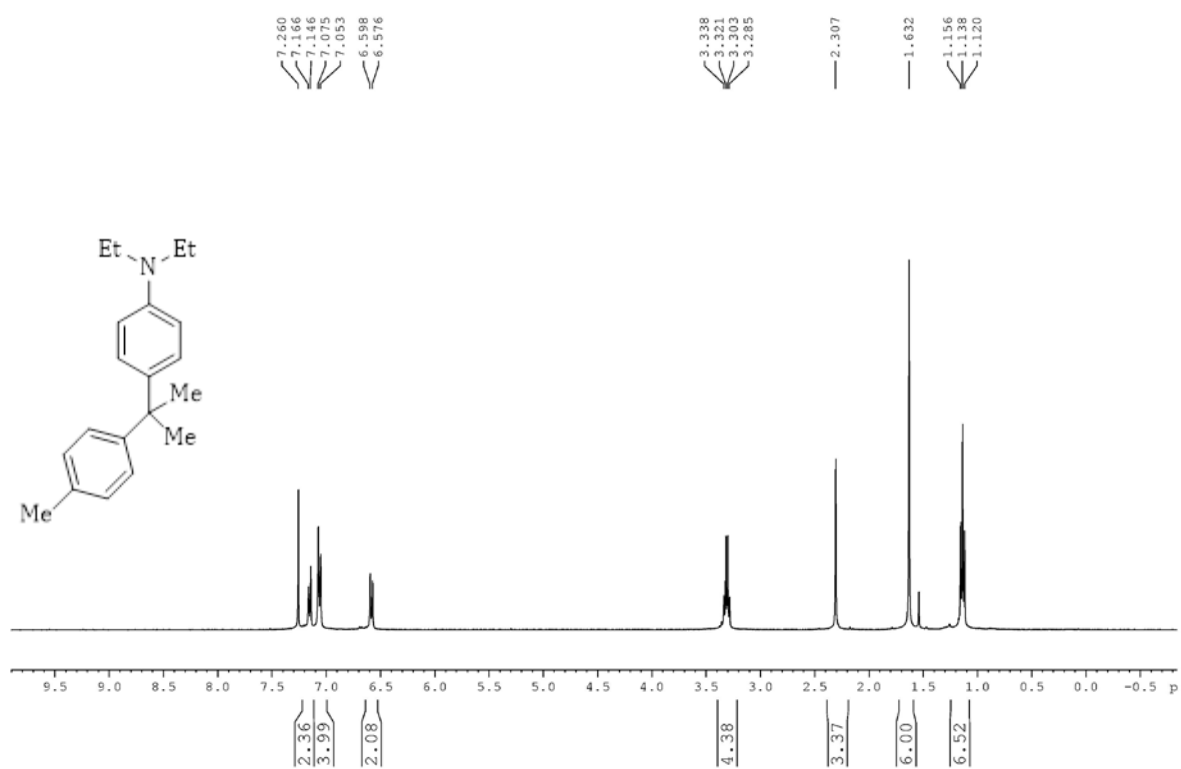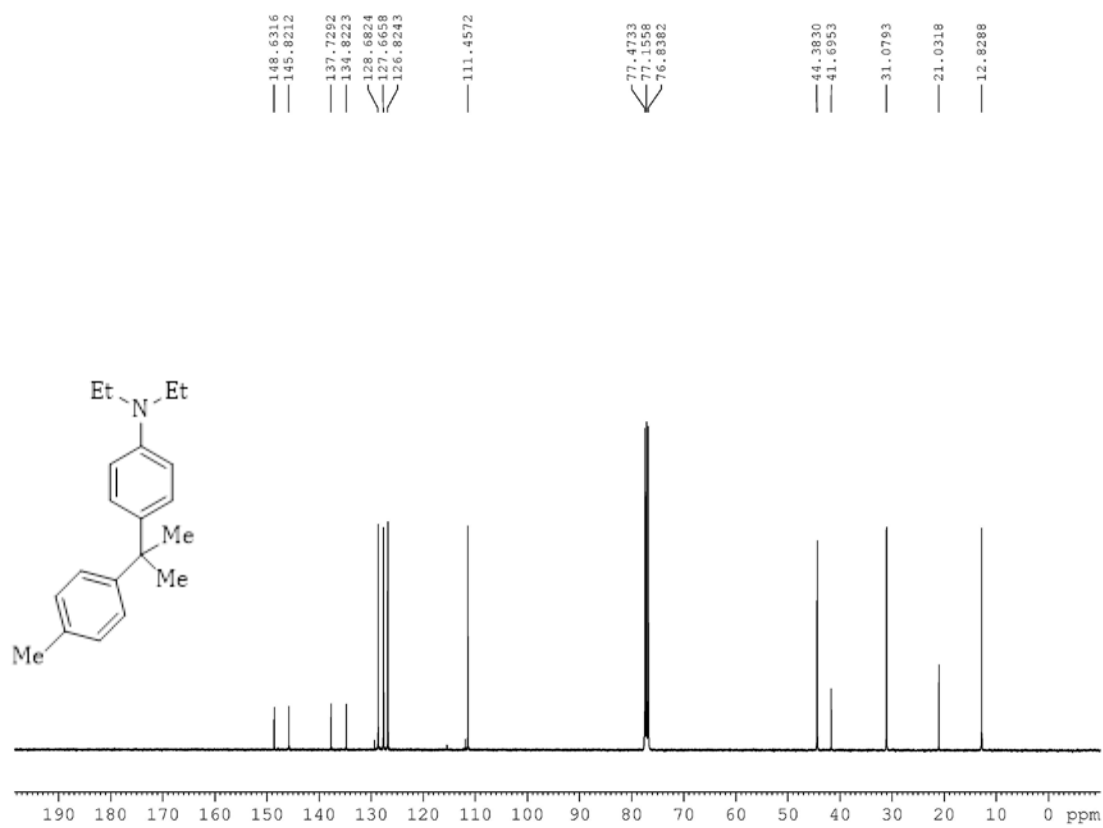

# Compound 8

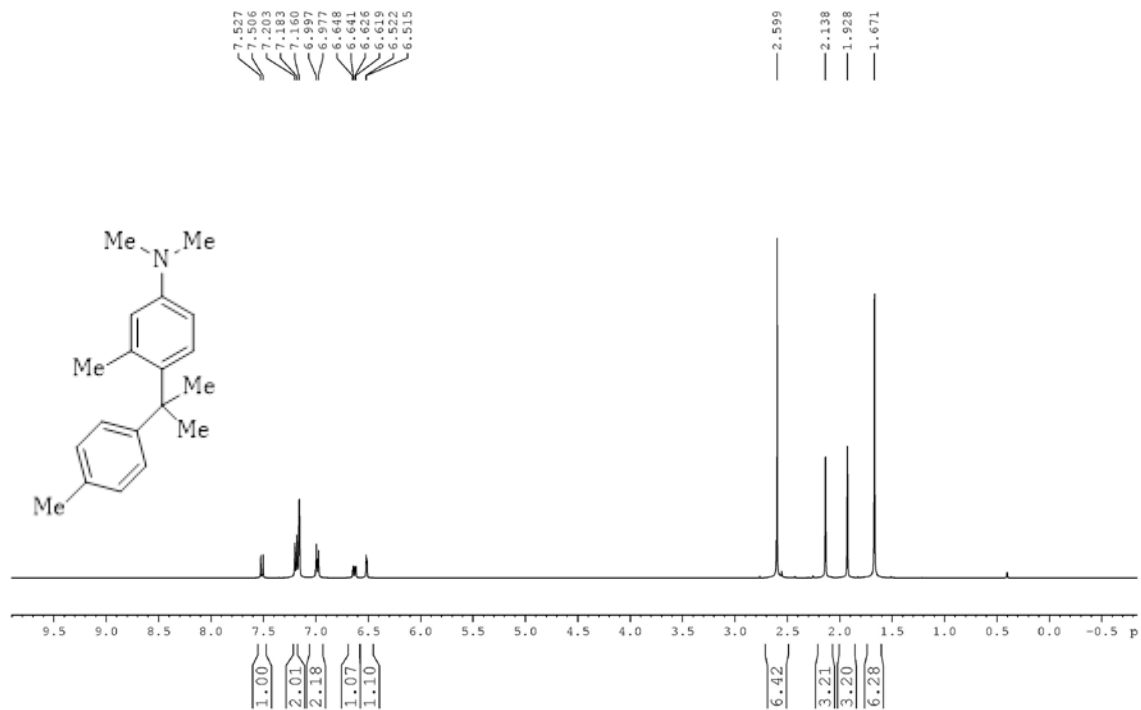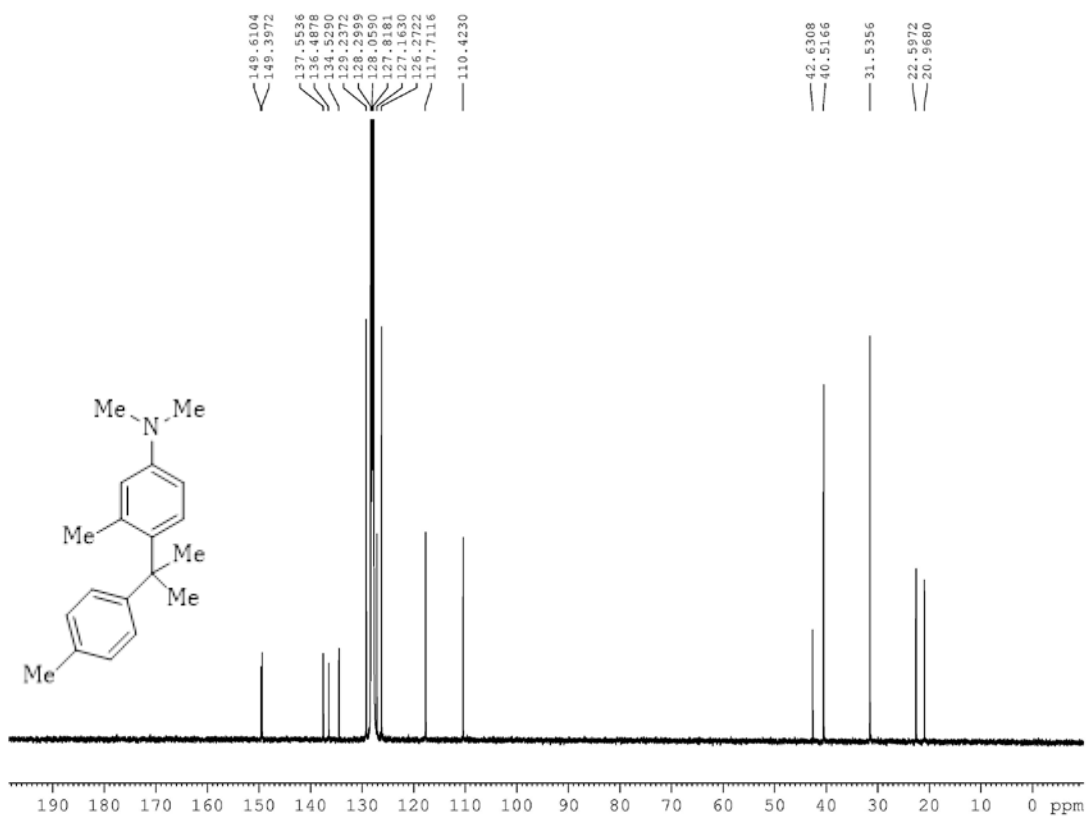

# Compound 9

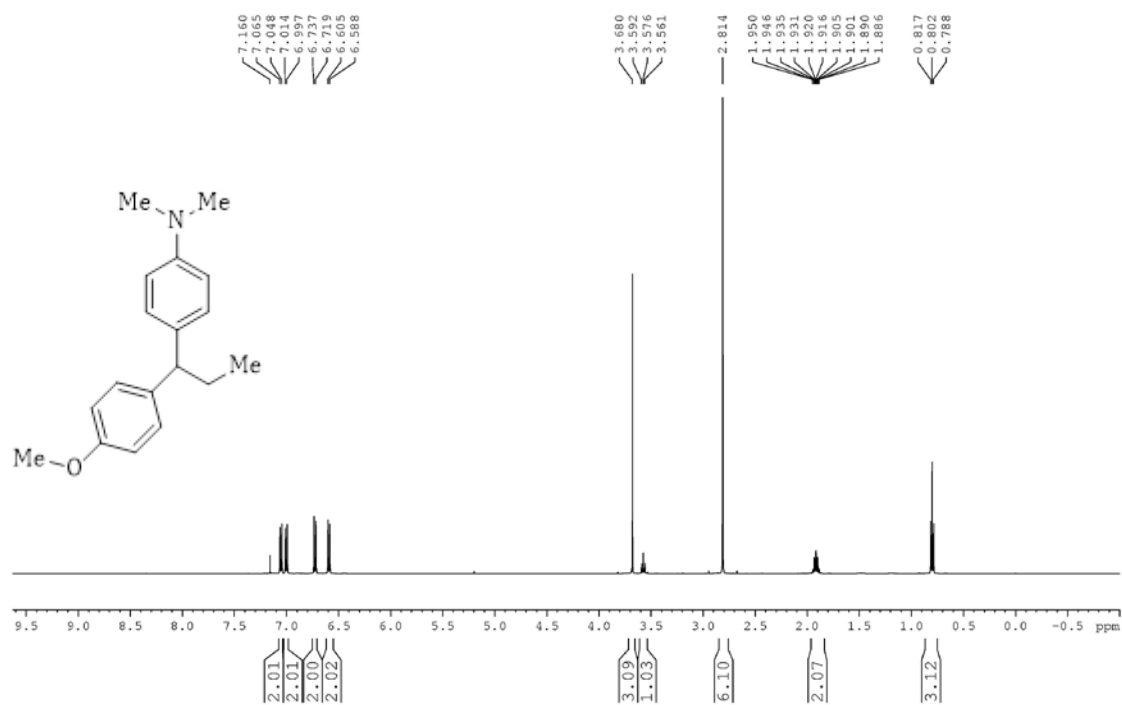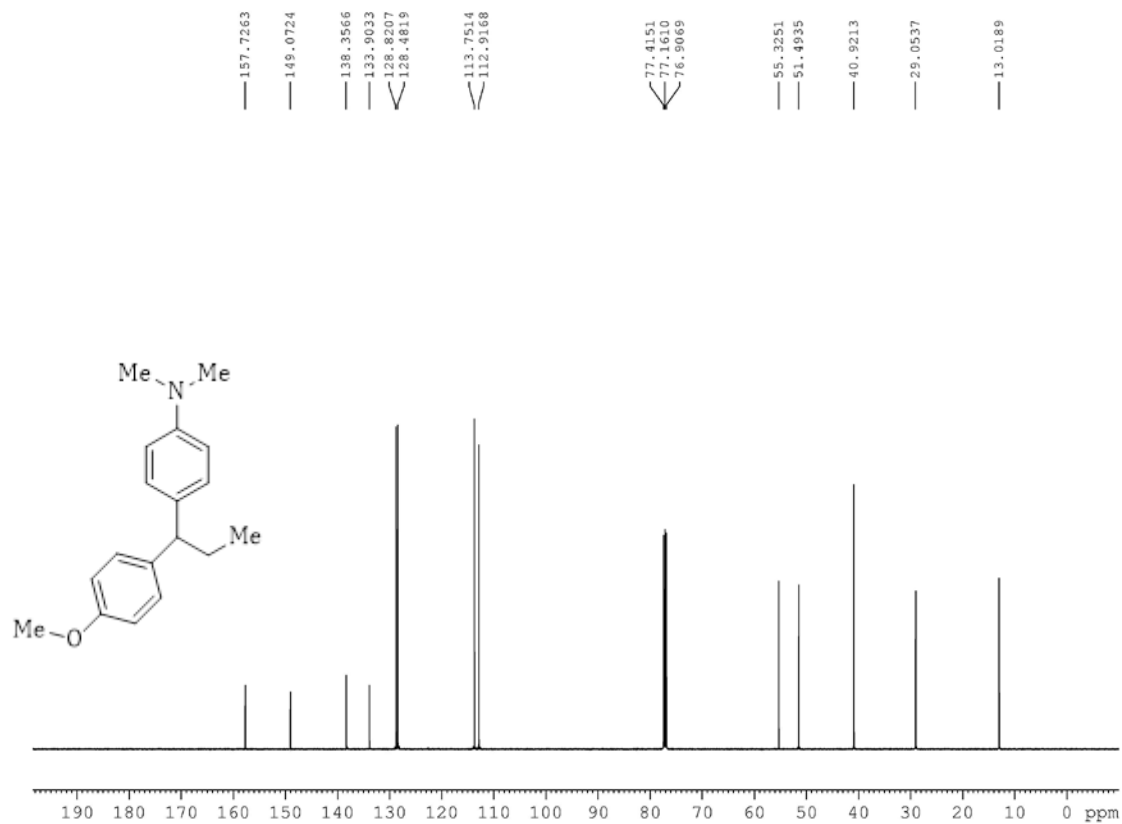

# Compound 10

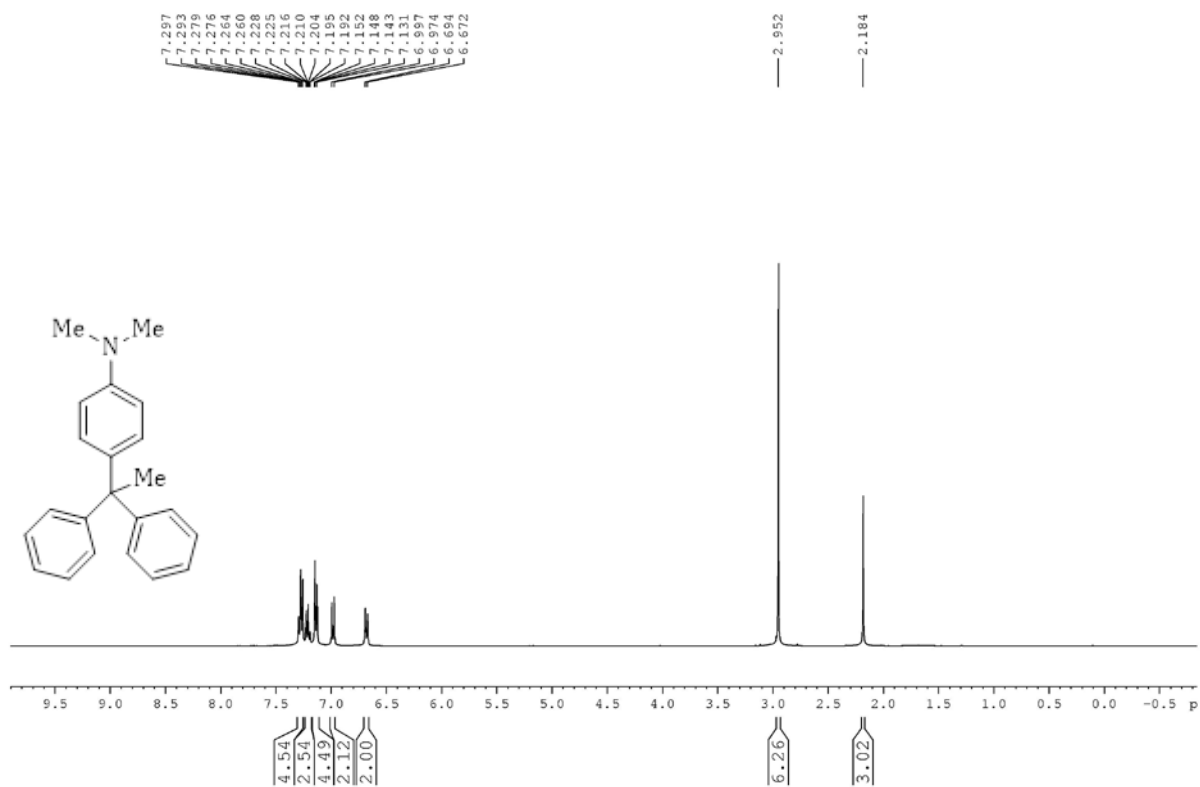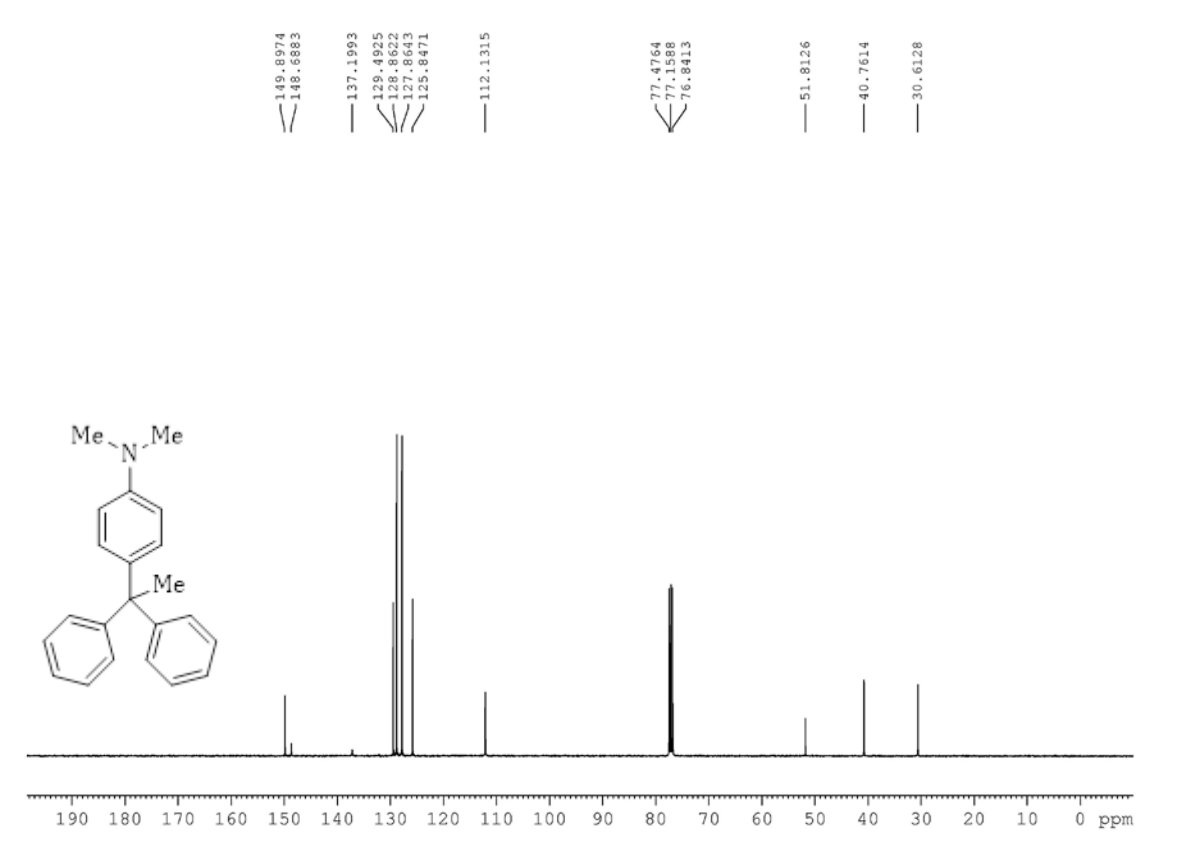

# Compound 11

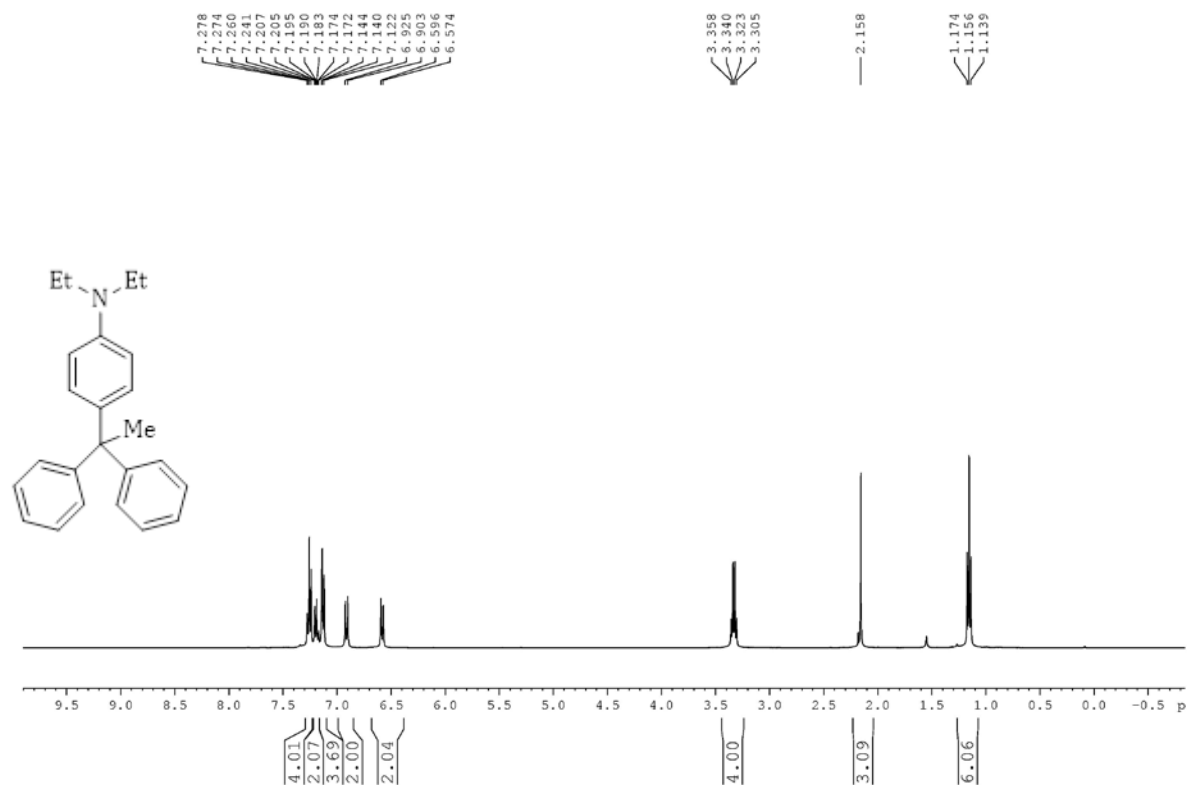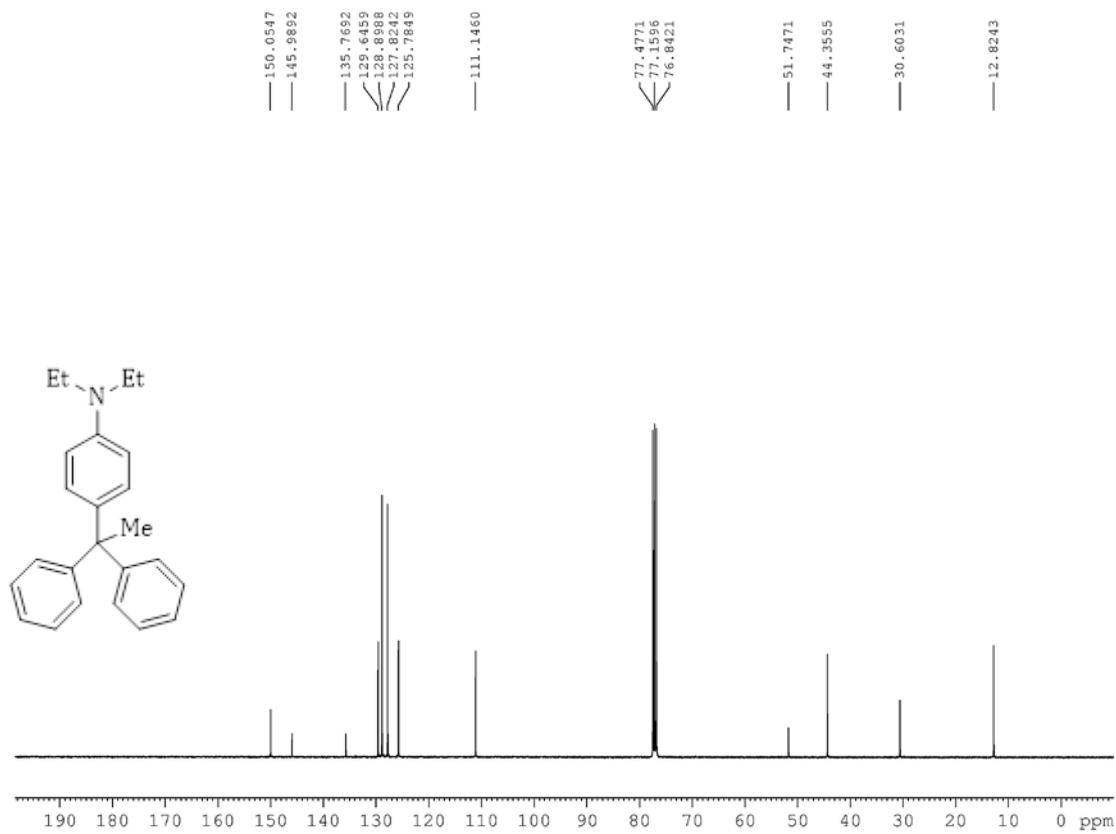

# Compound 12

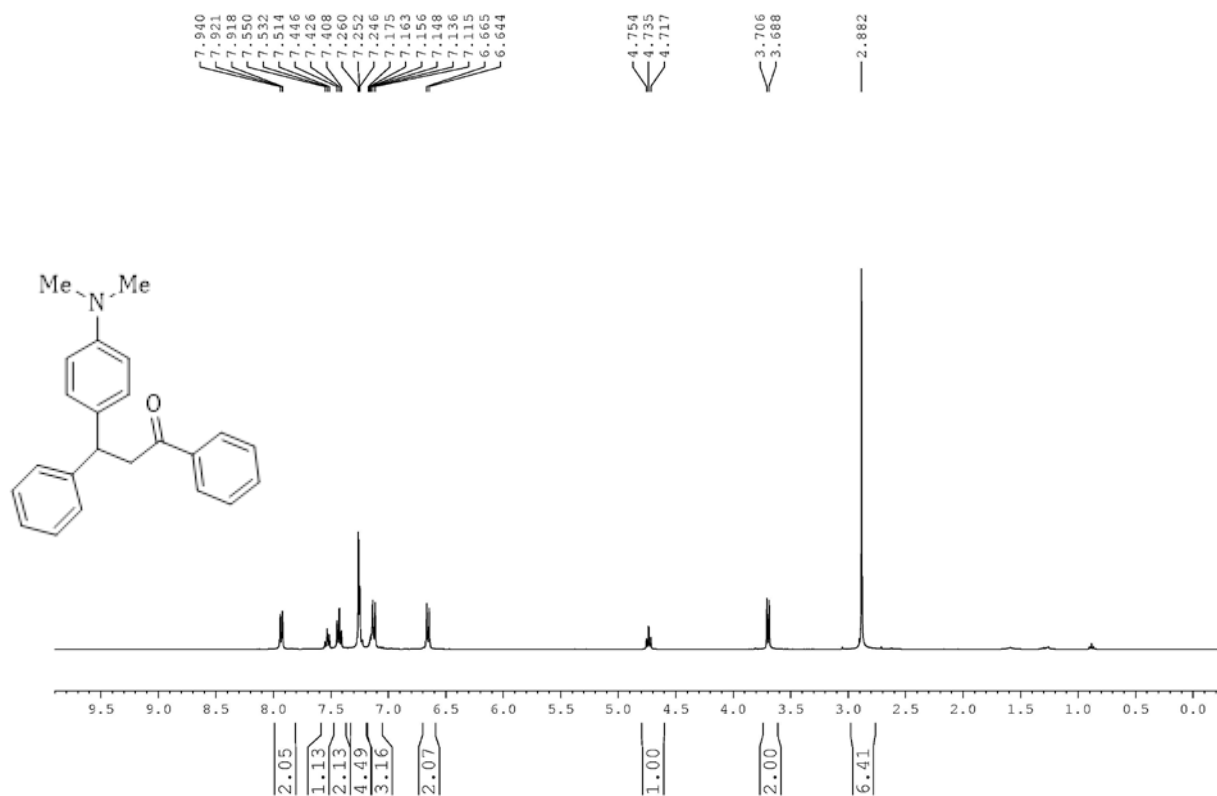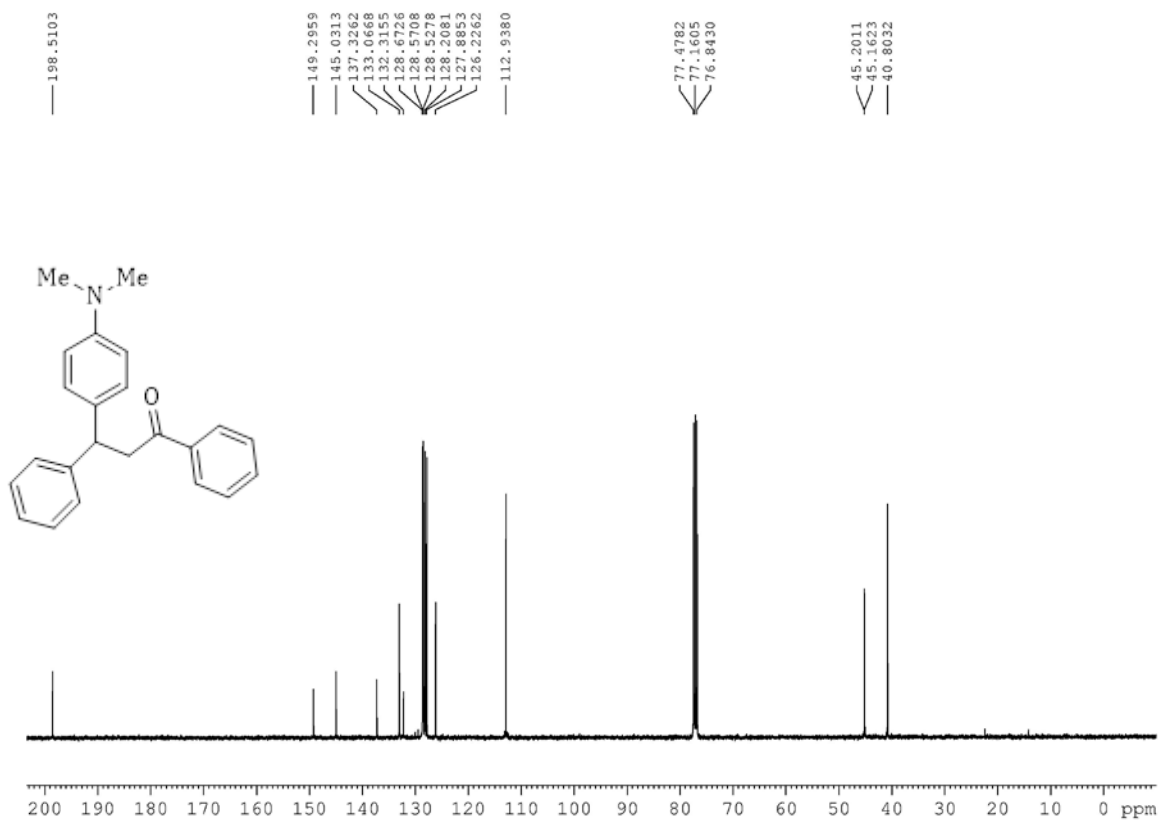

## IV. Computational data

### Alternative initial intermediates with arylated styrene and/or *N,N*-dimethylaniline

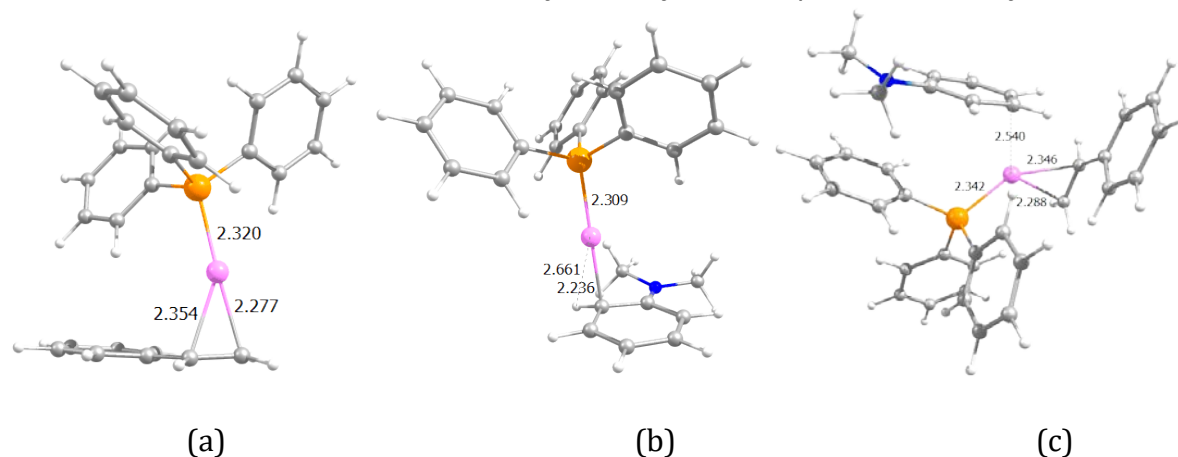

**Figure S1.** Molecular structure of the computed intermediates corresponding to the interaction of  $[(PPh_3)Au]^+$  with (a) the arylated styrene, (b) *N,N*-dimethylaniline, and (c) arylated styrene and *N,N*-dimethylaniline (selected distances in Å).

### Deprotonation of the aniline

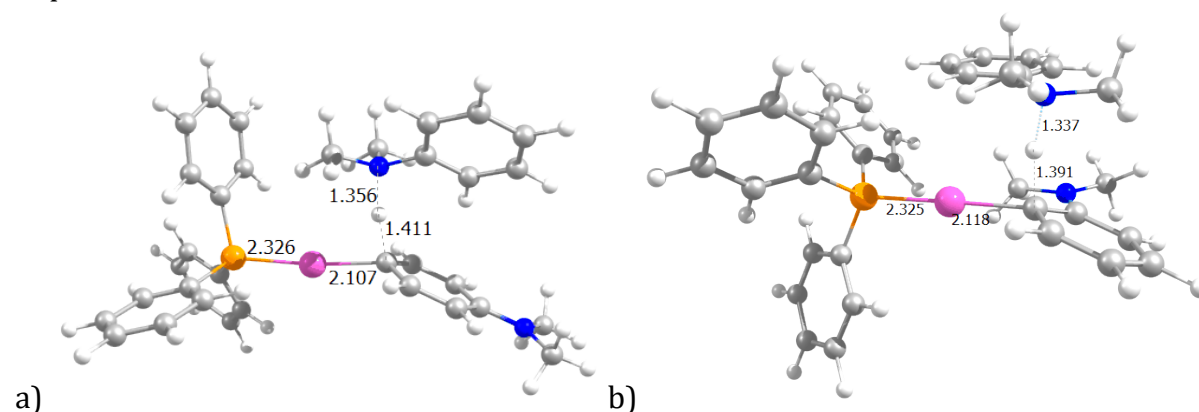

**Figure S2.** Transition states corresponding to the proton transfer from  $[(PPh_3)Au(N,N\text{-dimethylaniline})]^+$  to a free *N,N*-dimethylaniline molecule (selected distances in Å) in a) para and b) ortho.

An alternative reaction could be the C-H bond cleavage once the aniline is bound to  $[(PPh_3)Au]^+$ , together with the coordination of a styrene substrate. The energy barrier for such a process is 45.3 kcal/mol, consequently generating a hydride, and, even more importantly, the metal centre necessarily might switch from Au(I) to Au(III). Presumably, due to the positive charge, this step is also highly unfavored from a thermodynamic point of view (by 42.2 kcal/mol).

### C-C bond formation

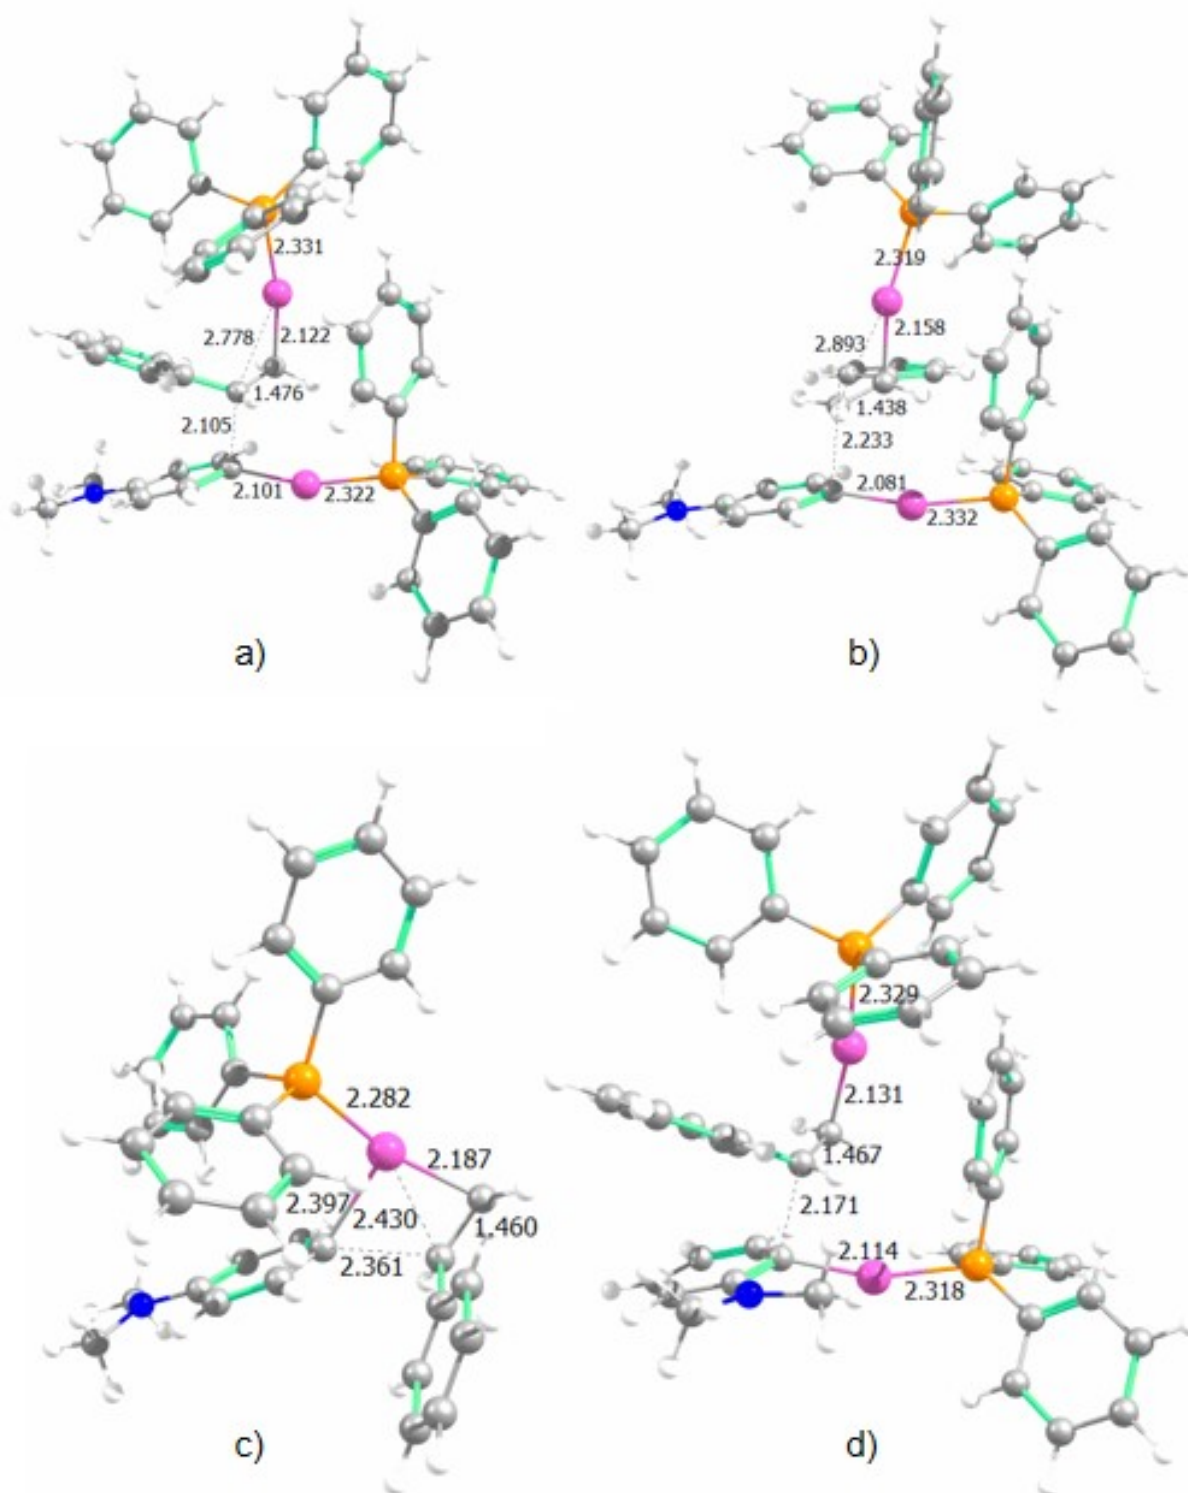

**Figure S3.** Molecular structures of the computed transition states corresponding to the C-C bond formation following (a) the Markovnikov rules and the (b) anti-Markovnikov rules for the bimetallic mechanism, (c) the Markovnikov rule with only a gold moiety, bearing the *para* substitution of the aniline in all cases, and (d) the Markovnikov rule bearing the bimolecular mechanism and *ortho* substitution of the aniline (selected distances in Å).



## Protonation and release of the alkane product

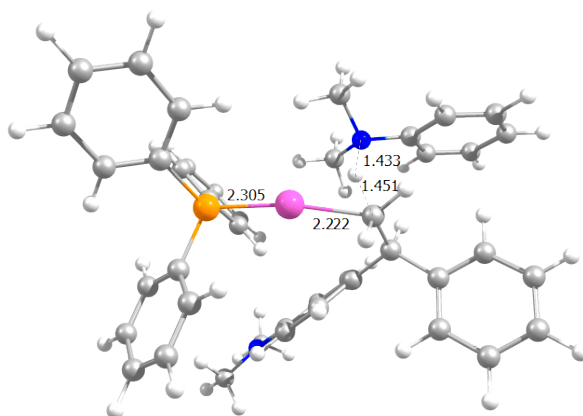

**Figure S4.** Molecular structure of the computed transition state corresponding to the protonation of the arylated styrene following the Markovnikov rule by a protonated *N,N*-dimethylaniline (selected distances in Å).

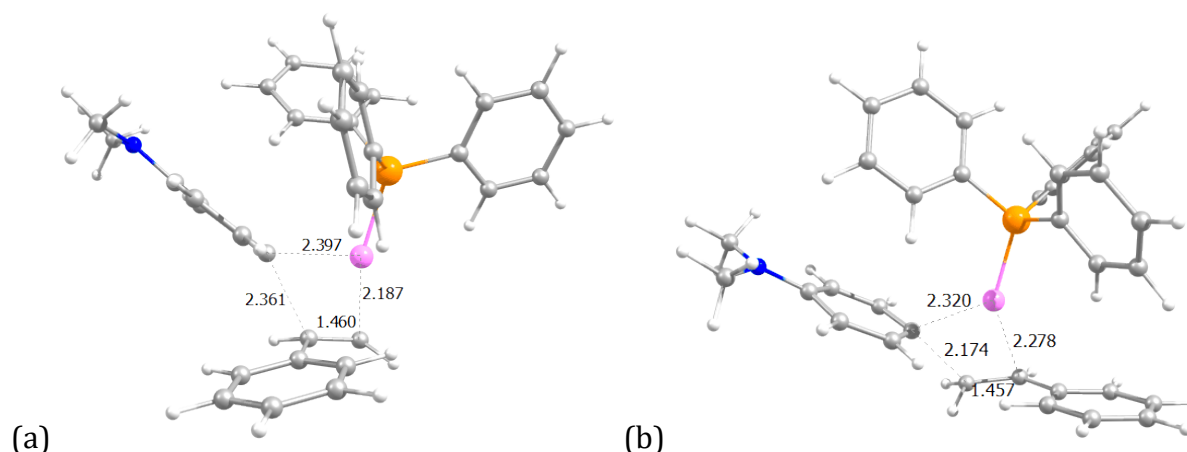

**Figure S5.** Molecular structures of the computed transition states corresponding to the C-C bond formation following (a) the Markovnikov rules and the (b) anti-Markovnikov rules for the monometallic mechanism (selected distances in Å).

## Summary

Overall, Firstly, a dual gold mechanism was determined (Scheme 4), pointing out that the activation of the catalyst led to the catalytically active cationic species,  $[(PPh_3)Au]^+$ , which is prone to coordinate and activate an incoming alkene derivative. Secondly, the coordination of the dialkylaniline requires its deprotonation and here a free dialkylaniline acts as a base. Thirdly, the C-C bond formation exclusively leads to the Markovnikov product. Here the strong  $\pi$ - $\pi$  interaction between the six-membered rings that bear the aniline and the styrene moieties help to explain this high selectivity. Finally, the protonated aniline generated in the activation of the precatalyst easily protonates and generates the organic product in an exothermic step. Further, calculations also help to rationalize why the aryl rings on the alkene and aniline help to favor the *para*

Markovnikov products. It is noteworthy that the more hindered the alkene or the aniline are, the more selective the reaction becomes towards the *para* Markovnikov product.

## References:

---

1 N. Mézailles, L. Ricard, F.Gagosz, *Org. Lett.* 2005, **19**, 4133-4136.

**Table S1.** xyz coordinate data sets and absolute energies in a.u. for DFT optimized complexes.

[(PPh<sub>3</sub>)Au]<sup>+</sup>  
-1171.45539750 A.U.

|    |           |           |           |
|----|-----------|-----------|-----------|
| P  | 0.000058  | 0.001667  | -0.190917 |
| C  | 0.694932  | 1.571056  | -0.782258 |
| C  | 1.684104  | 1.576677  | -1.791769 |
| C  | 0.188411  | 2.785251  | -0.260142 |
| C  | 2.155869  | 2.806041  | -2.281953 |
| H  | 2.079045  | 0.631761  | -2.195368 |
| C  | 0.667227  | 4.003810  | -0.760408 |
| H  | -0.574586 | 2.774873  | 0.535757  |
| C  | 1.650786  | 4.014001  | -1.769344 |
| H  | 2.924955  | 2.817284  | -3.069417 |
| H  | 0.277939  | 4.951065  | -0.356994 |
| H  | 2.029645  | 4.973490  | -2.154206 |
| C  | -1.700061 | -0.175125 | -0.802153 |
| C  | -2.185762 | 0.684056  | -1.813671 |
| C  | -2.506549 | -1.221141 | -0.293687 |
| C  | -3.481043 | 0.483159  | -2.319751 |
| H  | -1.557939 | 1.498452  | -2.206427 |
| C  | -3.795875 | -1.410700 | -0.809788 |
| H  | -2.126385 | -1.881215 | 0.503503  |
| C  | -4.282736 | -0.558710 | -1.821008 |
| H  | -3.864655 | 1.147931  | -3.108827 |
| H  | -4.428059 | -2.221757 | -0.417208 |
| H  | -5.298807 | -0.706611 | -2.218515 |
| C  | 1.010880  | -1.375339 | -0.804975 |
| C  | 2.317959  | -1.548273 | -0.290375 |
| C  | 0.518024  | -2.223090 | -1.822754 |
| C  | 3.133191  | -2.564920 | -0.806483 |
| H  | 2.693097  | -0.891010 | 0.511486  |
| C  | 1.346168  | -3.238989 | -2.329005 |
| H  | -0.499445 | -2.088916 | -2.220877 |
| C  | 2.647142  | -3.410135 | -1.823770 |
| H  | 4.150232  | -2.704565 | -0.409350 |
| H  | 0.968960  | -3.901240 | -3.123261 |
| H  | 3.288223  | -4.212145 | -2.221335 |
| Au | -0.005558 | -0.017698 | 2.092589  |

[(PPh<sub>3</sub>)Au(alkene)]<sup>+</sup>  
-1480.95355107 A.U.

|   |           |           |           |
|---|-----------|-----------|-----------|
| P | -1.098126 | 0.144656  | 0.001589  |
| H | 1.968370  | -3.876181 | 0.083685  |
| C | 2.314027  | -2.887724 | 0.428801  |
| C | 2.838086  | -1.982049 | -0.498170 |
| C | 3.849865  | -0.267552 | 1.079524  |
| C | 3.544429  | -0.716435 | -0.231853 |
| C | 4.452635  | 0.979346  | 1.276131  |
| C | 3.868694  | 0.114293  | -1.334884 |
| C | 4.763846  | 1.799329  | 0.171453  |
| H | 4.687302  | 1.318596  | 2.296577  |
| C | 4.472843  | 1.364474  | -1.133959 |
| H | 3.633650  | -0.224923 | -2.356719 |
| H | 5.242791  | 2.777798  | 0.332435  |
| H | 4.720915  | 1.999349  | -1.998193 |
| C | -0.459512 | 1.775731  | 0.536012  |
| C | -1.297967 | 2.676767  | 1.228920  |
| C | 0.867567  | 2.143561  | 0.214932  |
| C | -0.807575 | 3.942707  | 1.591894  |
| H | -2.328719 | 2.388288  | 1.489323  |
| C | 1.346504  | 3.410493  | 0.581258  |
| H | 1.534970  | 1.441808  | -0.312694 |
| C | 0.511084  | 4.310270  | 1.268641  |
| H | -1.459946 | 4.644190  | 2.134495  |
| H | 2.382547  | 3.688244  | 0.333740  |
| H | 0.891642  | 5.301661  | 1.559826  |
| C | -2.495978 | -0.274677 | 1.099477  |
| C | -3.829692 | -0.048998 | 0.696704  |
| C | -2.216046 | -0.787808 | 2.386203  |

|    |           |           |           |
|----|-----------|-----------|-----------|
| C  | -4.879140 | -0.335565 | 1.587108  |
| H  | -4.048388 | 0.344001  | -0.308596 |
| C  | -3.270448 | -1.067668 | 3.268529  |
| H  | -1.172925 | -0.968123 | 2.695916  |
| C  | -4.601410 | -0.841767 | 2.869139  |
| H  | -5.920569 | -0.163577 | 1.274152  |
| H  | -3.053957 | -1.469078 | 4.270517  |
| H  | -5.427560 | -1.067451 | 3.561141  |
| C  | -1.776469 | 0.345232  | -1.683626 |
| C  | -2.041294 | 1.624546  | -2.217599 |
| C  | -2.074895 | -0.816514 | -2.431854 |
| C  | -2.610748 | 1.735322  | -3.498268 |
| H  | -1.803255 | 2.530225  | -1.638028 |
| C  | -2.647330 | -0.694855 | -3.707047 |
| H  | -1.861314 | -1.814836 | -2.014579 |
| C  | -2.914567 | 0.580480  | -4.240452 |
| H  | -2.817144 | 2.732258  | -3.917413 |
| H  | -2.882051 | -1.598813 | -4.290001 |
| H  | -3.358822 | 0.673431  | -5.243642 |
| Au | 0.622843  | -1.409614 | 0.054275  |
| H  | 2.509651  | -2.790416 | 1.510636  |
| H  | 2.781953  | -2.266138 | -1.566395 |
| H  | 3.609112  | -0.896278 | 1.950150  |

**[(PPh<sub>3</sub>)Au(alkene)(*para*-aniline)]<sup>+</sup>**

-1846.95077013 A.U.

|   |           |           |           |
|---|-----------|-----------|-----------|
| P | 1.114924  | 0.822060  | 0.075304  |
| H | -1.874207 | 2.855602  | -2.384520 |
| C | -2.231496 | 2.385089  | -1.453961 |
| C | -3.096206 | 1.282853  | -1.525541 |
| C | -3.598809 | 1.034642  | 0.953337  |
| C | -3.863301 | 0.700707  | -0.400790 |
| C | -4.278195 | 0.386316  | 1.992628  |
| C | -4.837738 | -0.288760 | -0.674728 |
| C | -5.239164 | -0.603675 | 1.705857  |
| H | -4.054797 | 0.654616  | 3.037021  |
| C | -5.520943 | -0.934143 | 0.368480  |
| H | -5.059917 | -0.556235 | -1.720721 |
| H | -5.770280 | -1.112986 | 2.524806  |
| H | -6.275983 | -1.700659 | 0.135563  |
| C | 2.111542  | 2.261646  | -0.479472 |
| C | 3.518303  | 2.267452  | -0.346661 |
| C | 1.449483  | 3.403088  | -0.982716 |
| C | 4.249724  | 3.410526  | -0.711644 |
| H | 4.043902  | 1.380253  | 0.039304  |
| C | 2.186510  | 4.542806  | -1.341434 |
| H | 0.354491  | 3.394466  | -1.096391 |
| C | 3.586847  | 4.547755  | -1.206456 |
| H | 5.346070  | 3.410598  | -0.609466 |
| H | 1.665692  | 5.429670  | -1.734492 |
| H | 4.164393  | 5.440198  | -1.493552 |
| C | 2.313415  | -0.564311 | 0.090053  |
| C | 2.856988  | -1.063383 | 1.290901  |
| C | 2.773754  | -1.052397 | -1.152793 |
| C | 3.871809  | -2.036135 | 1.245115  |
| H | 2.500468  | -0.681283 | 2.260127  |
| C | 3.799487  | -2.007647 | -1.190182 |
| H | 2.336387  | -0.672501 | -2.090232 |
| C | 4.351210  | -2.498888 | 0.008809  |
| H | 4.298176  | -2.422833 | 2.183792  |
| H | 4.172362  | -2.371488 | -2.160497 |
| H | 5.156873  | -3.248775 | -0.024099 |
| C | 0.708276  | 1.150129  | 1.839863  |
| C | 1.435844  | 2.094594  | 2.596221  |
| C | -0.342531 | 0.424174  | 2.447177  |
| C | 1.114766  | 2.304651  | 3.948817  |
| H | 2.249356  | 2.672017  | 2.130170  |
| C | -0.654248 | 0.637432  | 3.799180  |
| H | -0.920908 | -0.303739 | 1.858764  |
| C | 0.073064  | 1.577972  | 4.552058  |
| H | 1.682373  | 3.045220  | 4.533416  |
| H | -1.474349 | 0.068542  | 4.264767  |
| H | -0.176299 | 1.748635  | 5.610919  |

---

|    |           |           |           |
|----|-----------|-----------|-----------|
| Au | -0.914425 | 0.555423  | -1.062655 |
| H  | -2.153717 | 2.999097  | -0.541536 |
| H  | -3.364414 | 0.911052  | -2.531108 |
| H  | -2.832741 | 1.785626  | 1.201187  |
| C  | -0.702459 | -2.776293 | 0.515104  |
| C  | 0.344379  | -3.372558 | -0.256926 |
| C  | -1.720261 | -2.043517 | -0.100867 |
| C  | 0.319054  | -3.169584 | -1.675577 |
| C  | -1.717859 | -1.812434 | -1.506736 |
| H  | -2.558904 | -1.663194 | 0.504997  |
| C  | -0.674617 | -2.402921 | -2.275906 |
| H  | 1.095881  | -3.617149 | -2.308430 |
| H  | -2.626131 | -1.443791 | -2.005917 |
| H  | -0.672147 | -2.277929 | -3.370050 |
| H  | -0.748477 | -2.929280 | 1.600803  |
| N  | 1.328327  | -4.130516 | 0.333153  |
| C  | 1.345208  | -4.302568 | 1.779672  |
| H  | 2.299496  | -4.774273 | 2.077774  |
| H  | 1.291767  | -3.318356 | 2.289499  |
| H  | 0.508931  | -4.940709 | 2.149798  |
| C  | 2.147472  | -5.025217 | -0.479789 |
| H  | 2.705363  | -4.469174 | -1.259274 |
| H  | 2.896193  | -5.518426 | 0.166003  |
| H  | 1.536693  | -5.812931 | -0.976898 |

**[(PPh<sub>3</sub>)Au(alkene)(*ortho*-aniline)]<sup>+</sup>**

-1846.95646327 A.U.

|   |           |           |           |
|---|-----------|-----------|-----------|
| P | 0.145011  | 1.046551  | -0.030150 |
| H | -0.387688 | -3.054627 | 2.764144  |
| C | -0.966626 | -2.827637 | 1.853911  |
| C | -1.831308 | -1.713060 | 1.847352  |
| C | -3.242102 | -2.335558 | -0.173648 |
| C | -2.902035 | -1.432863 | 0.865850  |
| C | -4.207579 | -1.989125 | -1.128990 |
| C | -3.569040 | -0.183966 | 0.927660  |
| C | -4.845510 | -0.734502 | -1.070131 |
| H | -4.469041 | -2.703952 | -1.924761 |
| C | -4.524632 | 0.164153  | -0.036905 |
| H | -3.314785 | 0.526805  | 1.729424  |
| H | -5.598225 | -0.462219 | -1.825963 |
| H | -5.021574 | 1.144785  | 0.018743  |
| C | -0.647172 | 1.239550  | -1.670614 |
| C | -0.540966 | 2.441432  | -2.410291 |
| C | -1.470097 | 0.197221  | -2.147402 |
| C | -1.236704 | 2.581443  | -3.622298 |
| H | 0.082444  | 3.270593  | -2.040723 |
| C | -2.170564 | 0.347895  | -3.354507 |
| H | -1.577058 | -0.732929 | -1.568506 |
| C | -2.050361 | 1.535613  | -4.096656 |
| H | -1.145886 | 3.516000  | -4.197412 |
| H | -2.816173 | -0.469652 | -3.710232 |
| H | -2.595442 | 1.650848  | -5.046506 |
| C | 1.740907  | 1.963207  | -0.086394 |
| C | 2.278197  | 2.511366  | 1.099880  |
| C | 2.465217  | 2.082811  | -1.293972 |
| C | 3.519036  | 3.170178  | 1.075107  |
| H | 1.723286  | 2.444516  | 2.047952  |
| C | 3.699659  | 2.754065  | -1.314377 |
| H | 2.062052  | 1.657905  | -2.223958 |
| C | 4.230853  | 3.297501  | -0.131621 |
| H | 3.924926  | 3.598670  | 2.004573  |
| H | 4.247762  | 2.853805  | -2.264310 |
| H | 5.197320  | 3.824459  | -0.150338 |
| C | -0.930255 | 1.988286  | 1.140962  |
| C | -1.913768 | 2.892884  | 0.689952  |
| C | -0.815925 | 1.718258  | 2.524687  |
| C | -2.769628 | 3.517735  | 1.614111  |
| H | -2.035410 | 3.092734  | -0.384951 |
| C | -1.664145 | 2.354624  | 3.444862  |
| H | -0.074798 | 0.983675  | 2.882178  |
| C | -2.648168 | 3.251907  | 2.989172  |
| H | -3.542209 | 4.214351  | 1.253062  |
| H | -1.565717 | 2.139998  | 4.520387  |
| H | -3.324254 | 3.740170  | 3.707989  |

---

|    |           |           |           |
|----|-----------|-----------|-----------|
| Au | 0.112322  | -1.202442 | 0.711549  |
| H  | -1.118643 | -3.673778 | 1.163049  |
| H  | -1.821966 | -1.046818 | 2.728253  |
| H  | -2.750507 | -3.318700 | -0.234009 |
| C  | 1.755664  | -2.701552 | -0.323023 |
| C  | 2.840787  | -1.757826 | -0.474610 |
| C  | 0.870243  | -2.957698 | -1.415760 |
| C  | 2.925734  | -1.057996 | -1.720119 |
| C  | 0.967949  | -2.243173 | -2.609698 |
| H  | 0.100425  | -3.735554 | -1.291983 |
| C  | 2.009777  | -1.296504 | -2.744364 |
| H  | 3.725084  | -0.325198 | -1.880740 |
| H  | 0.261820  | -2.419769 | -3.433328 |
| H  | 2.108366  | -0.731384 | -3.684834 |
| H  | 1.777362  | -3.428685 | 0.501911  |
| N  | 3.734321  | -1.540144 | 0.543336  |
| C  | 3.478522  | -2.124087 | 1.850342  |
| H  | 4.262959  | -1.807337 | 2.560344  |
| H  | 2.484402  | -1.798890 | 2.252129  |
| H  | 3.479934  | -3.234799 | 1.817235  |
| C  | 4.741651  | -0.488077 | 0.425675  |
| H  | 4.285078  | 0.525230  | 0.383369  |
| H  | 5.415997  | -0.531655 | 1.299901  |
| H  | 5.365661  | -0.631947 | -0.480433 |

**[(PPh<sub>3</sub>)Au(*para*-aniline)]<sup>+</sup>**

-1537.49129268 A.U.

|    |           |           |           |
|----|-----------|-----------|-----------|
| P  | -1.406074 | 0.143918  | 0.009103  |
| C  | 3.896745  | -0.651008 | -1.236579 |
| C  | 4.383302  | -0.102354 | 0.000959  |
| C  | 2.983610  | -1.697820 | -1.245302 |
| C  | 3.903687  | -0.685566 | 1.225275  |
| C  | 2.455119  | -2.250291 | -0.023783 |
| H  | 2.664241  | -2.126759 | -2.208150 |
| C  | 2.990336  | -1.732319 | 1.209608  |
| H  | 4.267512  | -0.321574 | 2.194288  |
| H  | 2.012661  | -3.262880 | -0.036772 |
| H  | 2.677020  | -2.188393 | 2.161923  |
| C  | -2.711217 | -0.688857 | -0.967115 |
| C  | -3.573845 | 0.042910  | -1.811116 |
| C  | -2.871024 | -2.086116 | -0.825695 |
| C  | -4.594463 | -0.626831 | -2.508475 |
| H  | -3.448154 | 1.130900  | -1.926414 |
| C  | -3.895855 | -2.744842 | -1.521935 |
| H  | -2.191132 | -2.656785 | -0.171257 |
| C  | -4.756786 | -2.015895 | -2.364107 |
| H  | -5.265843 | -0.057562 | -3.169860 |
| H  | -4.020213 | -3.833220 | -1.411839 |
| H  | -5.556259 | -2.535865 | -2.914493 |
| C  | -1.211499 | 1.818037  | -0.709050 |
| C  | -1.868507 | 2.935640  | -0.151376 |
| C  | -0.425992 | 1.965057  | -1.874694 |
| C  | -1.741075 | 4.194002  | -0.765437 |
| H  | -2.476483 | 2.825642  | 0.760200  |
| C  | -0.310075 | 3.223591  | -2.484616 |
| H  | 0.093807  | 1.091467  | -2.302453 |
| C  | -0.966738 | 4.338478  | -1.929974 |
| H  | -2.252027 | 5.066463  | -0.329499 |
| H  | 0.298016  | 3.336782  | -3.395581 |
| H  | -0.871216 | 5.326163  | -2.407363 |
| C  | -2.080164 | 0.372932  | 1.694870  |
| C  | -3.471629 | 0.336628  | 1.930689  |
| C  | -1.186683 | 0.643750  | 2.755444  |
| C  | -3.962801 | 0.577665  | 3.225387  |
| H  | -4.169082 | 0.117953  | 1.106876  |
| C  | -1.686636 | 0.886778  | 4.044172  |
| H  | -0.099809 | 0.660453  | 2.569166  |
| C  | -3.073968 | 0.853843  | 4.279396  |
| H  | -5.047654 | 0.546642  | 3.410709  |
| H  | -0.990793 | 1.096644  | 4.871224  |
| H  | -3.463703 | 1.038679  | 5.292506  |
| Au | 0.573514  | -1.043096 | -0.001937 |
| H  | 4.254798  | -0.259554 | -2.196986 |
| N  | 5.278322  | 0.927988  | 0.012813  |

---

|   |          |          |           |
|---|----------|----------|-----------|
| C | 5.787542 | 1.482793 | -1.241998 |
| H | 6.471838 | 2.320290 | -1.019053 |
| H | 6.352646 | 0.725594 | -1.828310 |
| H | 4.963747 | 1.876267 | -1.875744 |
| C | 5.792627 | 1.449323 | 1.279844  |
| H | 6.363591 | 0.678084 | 1.841740  |
| H | 6.472692 | 2.295291 | 1.076799  |
| H | 4.970999 | 1.822010 | 1.928733  |

**[(PPh<sub>3</sub>)Au(*ortho*-aniline)]<sup>+</sup>**

-1537.49391303 A.U.

|    |           |           |           |
|----|-----------|-----------|-----------|
| P  | -1.256567 | 0.022705  | 0.059930  |
| C  | 3.078597  | -0.537818 | -1.177614 |
| C  | 3.737972  | 0.141792  | -0.064872 |
| C  | 3.010893  | -1.980924 | -1.184468 |
| C  | 4.141831  | -0.665617 | 1.048228  |
| C  | 3.438182  | -2.731850 | -0.092667 |
| H  | 2.621280  | -2.476656 | -2.087670 |
| C  | 3.995843  | -2.051955 | 1.018950  |
| H  | 4.603217  | -0.201701 | 1.929281  |
| H  | 3.357359  | -3.828158 | -0.096508 |
| H  | 4.337135  | -2.633785 | 1.889993  |
| C  | -2.438385 | -0.941472 | -0.949819 |
| C  | -3.672132 | -0.387929 | -1.355899 |
| C  | -2.117135 | -2.278811 | -1.274230 |
| C  | -4.581862 | -1.178500 | -2.079211 |
| H  | -3.920627 | 0.656903  | -1.111513 |
| C  | -3.033686 | -3.061275 | -1.993279 |
| H  | -1.147405 | -2.703595 | -0.965353 |
| C  | -4.265500 | -2.511636 | -2.395562 |
| H  | -5.543506 | -0.747822 | -2.398563 |
| H  | -2.783814 | -4.103136 | -2.246699 |
| H  | -4.980909 | -3.125584 | -2.964485 |
| C  | -1.715062 | 1.784258  | -0.145143 |
| C  | -2.425319 | 2.484778  | 0.852164  |
| C  | -1.365405 | 2.428949  | -1.354259 |
| C  | -2.784568 | 3.827050  | 0.635142  |
| H  | -2.697373 | 1.985601  | 1.795183  |
| C  | -1.733615 | 3.766433  | -1.564402 |
| H  | -0.810768 | 1.878549  | -2.132732 |
| C  | -2.441615 | 4.466577  | -0.568775 |
| H  | -3.337858 | 4.374761  | 1.413706  |
| H  | -1.466233 | 4.266351  | -2.508325 |
| H  | -2.726257 | 5.517449  | -0.733406 |
| C  | -1.581674 | -0.406386 | 1.808190  |
| C  | -2.838664 | -0.912453 | 2.205109  |
| C  | -0.574649 | -0.171470 | 2.771133  |
| C  | -3.084527 | -1.173521 | 3.563921  |
| H  | -3.621354 | -1.106434 | 1.454883  |
| C  | -0.830640 | -0.431807 | 4.126510  |
| H  | 0.411090  | 0.210185  | 2.456394  |
| C  | -2.084879 | -0.931979 | 4.523173  |
| H  | -4.063475 | -1.571034 | 3.873497  |
| H  | -0.045761 | -0.250108 | 4.876981  |
| H  | -2.281660 | -1.140996 | 5.586204  |
| Au | 0.942060  | -0.334338 | -0.549760 |
| H  | 3.040277  | -0.032998 | -2.157955 |
| N  | 3.941743  | 1.490798  | -0.091153 |
| C  | 3.365214  | 2.288134  | -1.166725 |
| H  | 3.607811  | 3.353736  | -1.009801 |
| H  | 3.763466  | 1.990214  | -2.159720 |
| H  | 2.252214  | 2.176691  | -1.195127 |
| C  | 4.511047  | 2.175016  | 1.070551  |
| H  | 5.497970  | 1.747252  | 1.342644  |
| H  | 4.665943  | 3.240563  | 0.824626  |
| H  | 3.841186  | 2.114815  | 1.957761  |

**[(PPh<sub>3</sub>)Au(*para*-aniline)]<sup>+</sup> (TS extraction proton by a second aniline)**

-1903.46043587 A.U.

|   |           |           |           |
|---|-----------|-----------|-----------|
| P | -2.520076 | 0.196246  | -0.081797 |
| C | 4.369496  | -1.472836 | 0.632580  |
| C | 3.318132  | -2.358837 | 0.314771  |
| C | 5.685427  | -1.788036 | 0.265967  |
| C | 3.595262  | -3.554666 | -0.374260 |

|    |           |           |           |
|----|-----------|-----------|-----------|
| C  | 5.967572  | -2.982603 | -0.420647 |
| H  | 6.496188  | -1.085799 | 0.514268  |
| C  | 4.919301  | -3.860607 | -0.738225 |
| H  | 2.796007  | -4.263711 | -0.629518 |
| H  | 7.001501  | -3.227721 | -0.708001 |
| H  | 5.126980  | -4.800279 | -1.273076 |
| C  | -2.732789 | -1.486705 | 0.633547  |
| C  | -3.146008 | -2.583509 | -0.149025 |
| C  | -2.318863 | -1.691313 | 1.971512  |
| C  | -3.142330 | -3.877879 | 0.404312  |
| H  | -3.468538 | -2.428159 | -1.190551 |
| C  | -2.323822 | -2.983225 | 2.518270  |
| H  | -1.996047 | -0.831686 | 2.582343  |
| C  | -2.730341 | -4.079962 | 1.732780  |
| H  | -3.469337 | -4.732376 | -0.208523 |
| H  | -2.011349 | -3.137271 | 3.563087  |
| H  | -2.732197 | -5.093962 | 2.162226  |
| C  | -3.350443 | 0.158995  | -1.713606 |
| C  | -4.744681 | 0.349947  | -1.830296 |
| C  | -2.576443 | -0.113896 | -2.863635 |
| C  | -5.357226 | 0.259511  | -3.090971 |
| H  | -5.350917 | 0.579310  | -0.939895 |
| C  | -3.197335 | -0.208912 | -4.120224 |
| H  | -1.485179 | -0.244274 | -2.771550 |
| C  | -4.586734 | -0.022680 | -4.234026 |
| H  | -6.443625 | 0.414164  | -3.181519 |
| H  | -2.592054 | -0.419433 | -5.015584 |
| H  | -5.071497 | -0.089808 | -5.220482 |
| C  | -3.478954 | 1.325238  | 0.991541  |
| C  | -4.610729 | 0.880487  | 1.711452  |
| C  | -3.084990 | 2.680169  | 1.059488  |
| C  | -5.346070 | 1.793183  | 2.486132  |
| H  | -4.911839 | -0.178674 | 1.674583  |
| C  | -3.827873 | 3.586428  | 1.833485  |
| H  | -2.192856 | 3.020488  | 0.508032  |
| C  | -4.957538 | 3.143970  | 2.545718  |
| H  | -6.227120 | 1.446218  | 3.048204  |
| H  | -3.519619 | 4.642128  | 1.885490  |
| H  | -5.535919 | 3.855157  | 3.155872  |
| Au | -0.222616 | 0.558225  | -0.111303 |
| H  | 4.159522  | -0.522978 | 1.146538  |
| N  | 1.957917  | -1.972551 | 0.683035  |
| C  | 1.727853  | -1.879244 | 2.146467  |
| H  | 0.746515  | -1.388326 | 2.311563  |
| H  | 1.723970  | -2.887780 | 2.609564  |
| H  | 2.520454  | -1.265493 | 2.611458  |
| C  | 0.871968  | -2.724156 | 0.021406  |
| H  | 0.825598  | -3.774188 | 0.377489  |
| H  | -0.093474 | -2.234904 | 0.260176  |
| H  | 1.019348  | -2.703606 | -1.074456 |
| C  | 3.828395  | 1.505937  | -1.316621 |
| C  | 4.346663  | 2.224483  | -0.189663 |
| C  | 2.644598  | 0.782564  | -1.218919 |
| C  | 3.591488  | 2.166344  | 1.029929  |
| C  | 1.877638  | 0.696001  | -0.008473 |
| H  | 2.300836  | 0.227561  | -2.107877 |
| C  | 2.409424  | 1.435706  | 1.102944  |
| H  | 3.935958  | 2.704065  | 1.923299  |
| H  | 1.817280  | -0.678780 | 0.301249  |
| H  | 1.870943  | 1.420081  | 2.065493  |
| H  | 4.367902  | 1.507473  | -2.272772 |
| N  | 5.520546  | 2.928223  | -0.268436 |
| C  | 6.256036  | 2.995851  | -1.528449 |
| H  | 7.163368  | 3.610552  | -1.389844 |
| H  | 6.576683  | 1.987689  | -1.872553 |
| H  | 5.649475  | 3.461231  | -2.336605 |
| C  | 6.025042  | 3.654142  | 0.893715  |
| H  | 6.200065  | 2.975497  | 1.757508  |
| H  | 6.989189  | 4.129176  | 0.638538  |
| H  | 5.325568  | 4.455934  | 1.219621  |

[(PPh<sub>3</sub>)Au(*ortho*-aniline)]<sup>+</sup> (TS extraction proton by a second aniline)

-1903.46606053 A.U.

|   |           |           |           |
|---|-----------|-----------|-----------|
| P | -1.944083 | -0.180304 | -0.031971 |
|---|-----------|-----------|-----------|



---

|    |           |           |           |
|----|-----------|-----------|-----------|
| C  | 1.265508  | 2.271613  | 1.027263  |
| C  | 2.614037  | 1.851680  | 0.977145  |
| C  | 0.840059  | 3.378297  | 0.274615  |
| C  | 3.527351  | 2.568958  | 0.175471  |
| C  | 1.745775  | 4.082002  | -0.533257 |
| H  | -0.215941 | 3.681614  | 0.321845  |
| C  | 3.090465  | 3.674466  | -0.572731 |
| H  | 4.583236  | 2.276799  | 0.117051  |
| H  | 1.406372  | 4.946433  | -1.123472 |
| H  | 3.818272  | 4.225214  | -1.188664 |
| C  | -2.809964 | -0.212714 | 1.585653  |
| C  | -4.210602 | -0.373680 | 1.664624  |
| C  | -2.059189 | -0.022644 | 2.766713  |
| C  | -4.849173 | -0.332398 | 2.915619  |
| H  | -4.802179 | -0.537883 | 0.750301  |
| C  | -2.702881 | 0.023900  | 4.013682  |
| H  | -0.963298 | 0.075449  | 2.703825  |
| C  | -4.099075 | -0.130187 | 4.088354  |
| H  | -5.940899 | -0.462868 | 2.974398  |
| H  | -2.112886 | 0.171071  | 4.931639  |
| H  | -4.604215 | -0.100928 | 5.066319  |
| C  | -2.971155 | -1.168937 | -1.183787 |
| C  | -4.029984 | -0.586042 | -1.914684 |
| C  | -2.709007 | -2.552520 | -1.298776 |
| C  | -4.826145 | -1.390127 | -2.747869 |
| H  | -4.227799 | 0.494920  | -1.837482 |
| C  | -3.511340 | -3.349083 | -2.131401 |
| H  | -1.871646 | -3.001623 | -0.739123 |
| C  | -4.569766 | -2.769125 | -2.854627 |
| H  | -5.650352 | -0.935513 | -3.319280 |
| H  | -3.304917 | -4.426848 | -2.221061 |
| H  | -5.194666 | -3.394788 | -3.510840 |
| C  | -2.086867 | 1.553902  | -0.629634 |
| C  | -2.794545 | 2.543117  | 0.083743  |
| C  | -1.448875 | 1.884629  | -1.846733 |
| C  | -2.866076 | 3.854229  | -0.424272 |
| H  | -3.292313 | 2.292006  | 1.033332  |
| C  | -1.530077 | 3.190582  | -2.351261 |
| H  | -0.890942 | 1.112910  | -2.401071 |
| C  | -2.238541 | 4.178203  | -1.640015 |
| H  | -3.420545 | 4.624556  | 0.133925  |
| H  | -1.035620 | 3.441812  | -3.302354 |
| H  | -2.300813 | 5.203982  | -2.035434 |
| Au | 0.280154  | -0.851535 | 0.047597  |
| H  | 0.527836  | 1.746417  | 1.646857  |
| N  | 3.009125  | 0.628348  | 1.656379  |
| C  | 2.335478  | 0.375362  | 2.953031  |
| H  | 1.252569  | 0.221578  | 2.785057  |
| H  | 2.742172  | -0.558742 | 3.382165  |
| H  | 2.491742  | 1.217817  | 3.656502  |
| C  | 4.459358  | 0.338478  | 1.714538  |
| H  | 5.001442  | 1.097615  | 2.315018  |
| H  | 4.589485  | -0.664638 | 2.162151  |
| H  | 4.874478  | 0.297875  | 0.691404  |
| C  | 2.295995  | -1.497564 | 0.127808  |
| C  | 3.294835  | -1.306812 | -0.918430 |
| C  | 2.483162  | -2.615000 | 1.017803  |
| C  | 4.402253  | -2.209885 | -0.977409 |
| C  | 3.568609  | -3.484823 | 0.936745  |
| H  | 1.742018  | -2.766450 | 1.820374  |
| C  | 4.527400  | -3.270059 | -0.079277 |
| H  | 5.154719  | -2.106126 | -1.771605 |
| H  | 2.532243  | -0.363027 | 0.897307  |
| H  | 5.385813  | -3.953696 | -0.178393 |
| H  | 3.674778  | -4.323780 | 1.640808  |
| N  | 3.257891  | -0.230048 | -1.785308 |
| C  | 2.025645  | 0.429152  | -2.204903 |
| H  | 2.154409  | 0.815742  | -3.235889 |
| H  | 1.185699  | -0.298625 | -2.222386 |
| H  | 1.735270  | 1.279726  | -1.550112 |
| C  | 4.464212  | 0.209593  | -2.478927 |
| H  | 4.647073  | -0.338061 | -3.432761 |
| H  | 4.370073  | 1.288768  | -2.713424 |
| H  | 5.357988  | 0.089650  | -1.833917 |

---

**[(PPh<sub>3</sub>)Au(*para*-aniline)]**

-1537.06376633 A.U.

|    |           |           |           |
|----|-----------|-----------|-----------|
| P  | -1.729450 | -0.005025 | 0.007833  |
| C  | 4.825787  | -1.220076 | -0.042231 |
| C  | 5.563672  | -0.002119 | -0.029287 |
| C  | 3.422475  | -1.215339 | -0.029421 |
| C  | 4.812643  | 1.206858  | 0.019245  |
| C  | 2.661913  | -0.018876 | 0.004212  |
| H  | 2.906243  | -2.190114 | -0.043169 |
| C  | 3.409538  | 1.186183  | 0.031234  |
| H  | 5.323093  | 2.180155  | 0.047142  |
| H  | 2.882662  | 2.154713  | 0.066660  |
| C  | -2.450879 | 1.657904  | -0.322311 |
| C  | -3.619666 | 2.126244  | 0.315514  |
| C  | -1.796441 | 2.474765  | -1.272118 |
| C  | -4.132550 | 3.396113  | -0.003486 |
| H  | -4.127159 | 1.501104  | 1.067241  |
| C  | -2.316949 | 3.739334  | -1.590412 |
| H  | -0.870828 | 2.115723  | -1.752489 |
| C  | -3.485481 | 4.201608  | -0.957125 |
| H  | -5.042826 | 3.758465  | 0.500162  |
| H  | -1.801369 | 4.371439  | -2.330506 |
| H  | -3.888584 | 5.196998  | -1.202452 |
| C  | -2.514510 | -0.540938 | 1.586084  |
| C  | -3.757880 | -1.208568 | 1.627458  |
| C  | -1.839379 | -0.242483 | 2.790602  |
| C  | -4.323879 | -1.562142 | 2.864602  |
| H  | -4.281051 | -1.457695 | 0.690543  |
| C  | -2.411971 | -0.594764 | 4.023812  |
| H  | -0.856212 | 0.255940  | 2.753039  |
| C  | -3.654428 | -1.253737 | 4.062461  |
| H  | -5.292565 | -2.086083 | 2.891896  |
| H  | -1.879392 | -0.361774 | 4.959308  |
| H  | -4.098783 | -1.536114 | 5.030109  |
| C  | -2.493031 | -1.092754 | -1.268078 |
| C  | -3.675275 | -0.746961 | -1.957333 |
| C  | -1.859419 | -2.326026 | -1.539693 |
| C  | -4.222245 | -1.634150 | -2.901031 |
| H  | -4.165654 | 0.219723  | -1.760533 |
| C  | -2.413753 | -3.210514 | -2.478818 |
| H  | -0.921720 | -2.581757 | -1.018615 |
| C  | -3.595607 | -2.866056 | -3.160334 |
| H  | -5.143003 | -1.358331 | -3.439310 |
| H  | -1.913870 | -4.169525 | -2.687406 |
| H  | -4.025271 | -3.557165 | -3.902788 |
| Au | 0.617503  | -0.023984 | 0.012410  |
| H  | 5.347107  | -2.187751 | -0.064389 |
| N  | 6.957815  | 0.006263  | -0.062971 |
| C  | 7.687010  | -1.244812 | 0.011322  |
| H  | 8.773451  | -1.043301 | -0.052543 |
| H  | 7.497780  | -1.803931 | 0.960694  |
| H  | 7.425220  | -1.925972 | -0.830489 |
| C  | 7.673792  | 1.259700  | 0.073017  |
| H  | 7.482458  | 1.767649  | 1.050376  |
| H  | 8.762087  | 1.073574  | -0.004797 |
| H  | 7.401556  | 1.979929  | -0.732082 |

**[(PPh<sub>3</sub>)Au(*ortho*-aniline)]**

-1537.06436098 A.U.

|   |           |           |           |
|---|-----------|-----------|-----------|
| P | 1.343272  | -0.031416 | 0.023334  |
| C | -5.321588 | -0.046964 | 0.158199  |
| C | -3.946742 | 0.270628  | 0.042607  |
| C | -5.761823 | -1.382074 | 0.122419  |
| C | -2.987216 | -0.779596 | -0.100735 |
| C | -4.835988 | -2.420704 | -0.050270 |
| H | -6.837607 | -1.603030 | 0.218916  |
| C | -3.465914 | -2.108699 | -0.163008 |
| H | -5.171254 | -3.470109 | -0.084408 |
| H | -2.743344 | -2.934912 | -0.271500 |
| C | 1.983434  | 0.447101  | 1.682871  |
| C | 3.053588  | 1.351523  | 1.854348  |
| C | 1.375978  | -0.142457 | 2.814245  |
| C | 3.518160  | 1.651855  | 3.146710  |

---

|    |           |           |           |
|----|-----------|-----------|-----------|
| H  | 3.520303  | 1.826755  | 0.976988  |
| C  | 1.848242  | 0.157590  | 4.102326  |
| H  | 0.522131  | -0.827257 | 2.679126  |
| C  | 2.919822  | 1.053737  | 4.270136  |
| H  | 4.351408  | 2.360745  | 3.275935  |
| H  | 1.369139  | -0.303557 | 4.980274  |
| H  | 3.284390  | 1.293618  | 5.281567  |
| C  | 1.898855  | 1.324096  | -1.094135 |
| C  | 3.148612  | 1.302297  | -1.750071 |
| C  | 1.033524  | 2.427286  | -1.270050 |
| C  | 3.531163  | 2.381345  | -2.566142 |
| H  | 3.819686  | 0.437434  | -1.626533 |
| C  | 1.423425  | 3.503629  | -2.083031 |
| H  | 0.047266  | 2.430866  | -0.777557 |
| C  | 2.672169  | 3.482600  | -2.731070 |
| H  | 4.505636  | 2.358889  | -3.079351 |
| H  | 0.743403  | 4.359346  | -2.218946 |
| H  | 2.973565  | 4.324557  | -3.374289 |
| C  | 2.372994  | -1.476803 | -0.468844 |
| C  | 3.607169  | -1.776557 | 0.146236  |
| C  | 1.897421  | -2.292022 | -1.520675 |
| C  | 4.361905  | -2.877678 | -0.295183 |
| H  | 3.976174  | -1.151542 | 0.974760  |
| C  | 2.658720  | -3.386579 | -1.960960 |
| H  | 0.922338  | -2.067837 | -1.984664 |
| C  | 3.891301  | -3.680866 | -1.349056 |
| H  | 5.322906  | -3.110242 | 0.190487  |
| H  | 2.282490  | -4.019021 | -2.780431 |
| H  | 4.483640  | -4.544506 | -1.690659 |
| Au | -0.964026 | -0.418546 | -0.049926 |
| H  | -6.067307 | 0.755458  | 0.265269  |
| N  | -3.502341 | 1.631085  | 0.099324  |
| C  | -4.360207 | 2.585521  | 0.778553  |
| H  | -3.782387 | 3.511948  | 0.986285  |
| H  | -5.266390 | 2.891619  | 0.188338  |
| H  | -4.703368 | 2.170566  | 1.747454  |
| C  | -2.954424 | 2.174166  | -1.140461 |
| H  | -2.296966 | 1.429091  | -1.629306 |
| H  | -3.756972 | 2.462923  | -1.871439 |
| H  | -2.349044 | 3.082737  | -0.927203 |

**[(PPh<sub>3</sub>)Au(*para*-aniline)+(PPh<sub>3</sub>)Au(alkene)]<sup>+</sup> adduct**  
-3018.07535840 A.U.

|   |           |           |           |
|---|-----------|-----------|-----------|
| P | -3.903705 | -0.871514 | 0.009688  |
| H | 0.522041  | 1.264674  | 0.747016  |
| C | 0.062320  | 1.735261  | -0.139188 |
| C | -0.016010 | 0.943407  | -1.312628 |
| C | -0.362976 | 3.662892  | 1.351033  |
| C | -0.428495 | 3.084277  | 0.055148  |
| C | -0.814209 | 4.969065  | 1.579864  |
| C | -0.938186 | 3.875979  | -1.013521 |
| C | -1.305006 | 5.738952  | 0.510160  |
| H | -0.765976 | 5.395831  | 2.593486  |
| C | -1.379079 | 5.181278  | -0.784446 |
| H | -0.982118 | 3.456908  | -2.029748 |
| H | -1.645249 | 6.771560  | 0.684606  |
| H | -1.773508 | 5.780996  | -1.619440 |
| C | -4.990718 | 0.350162  | 0.839706  |
| C | -5.948666 | -0.056782 | 1.795758  |
| C | -4.875802 | 1.714730  | 0.492333  |
| C | -6.794042 | 0.897491  | 2.385973  |
| H | -6.023613 | -1.116151 | 2.088909  |
| C | -5.725208 | 2.661789  | 1.086752  |
| H | -4.110759 | 2.036530  | -0.233818 |
| C | -6.685140 | 2.254307  | 2.030887  |
| H | -7.539132 | 0.579289  | 3.131711  |
| H | -5.629624 | 3.724845  | 0.816735  |
| H | -7.347011 | 2.999330  | 2.499431  |
| C | -3.721498 | -2.247660 | 1.209065  |
| C | -4.066912 | -3.575147 | 0.884318  |
| C | -3.136875 | -1.955018 | 2.462671  |
| C | -3.821442 | -4.605874 | 1.810212  |
| H | -4.523826 | -3.806761 | -0.090461 |
| C | -2.905391 | -2.986211 | 3.385062  |

---

|    |           |           |           |
|----|-----------|-----------|-----------|
| H  | -2.861191 | -0.917315 | 2.712626  |
| C  | -3.241901 | -4.314367 | 3.057372  |
| H  | -4.087761 | -5.642893 | 1.553476  |
| H  | -2.453784 | -2.755200 | 4.362310  |
| H  | -3.052207 | -5.124218 | 3.778810  |
| C  | -4.841643 | -1.561383 | -1.407216 |
| C  | -6.236069 | -1.769068 | -1.320222 |
| C  | -4.146556 | -1.930621 | -2.580392 |
| C  | -6.923764 | -2.351467 | -2.397220 |
| H  | -6.787481 | -1.468265 | -0.415645 |
| C  | -4.840707 | -2.516136 | -3.652401 |
| H  | -3.061197 | -1.751463 | -2.653796 |
| C  | -6.227918 | -2.727928 | -3.560994 |
| H  | -8.011444 | -2.508376 | -2.328699 |
| H  | -4.296608 | -2.800672 | -4.566405 |
| H  | -6.771870 | -3.181846 | -4.403982 |
| Au | -1.859309 | 0.036017  | -0.617804 |
| H  | -0.225691 | 1.432051  | -2.281013 |
| H  | 0.680111  | 0.087458  | -1.372549 |
| H  | 0.048709  | 3.067251  | 2.180103  |
| P  | 3.365499  | -1.805959 | 0.051000  |
| C  | 2.197430  | 4.564545  | -1.339173 |
| C  | 2.126821  | 5.336509  | -0.139843 |
| C  | 2.583010  | 3.221403  | -1.302137 |
| C  | 2.550676  | 4.700922  | 1.067979  |
| C  | 2.938720  | 2.554160  | -0.096332 |
| H  | 2.589107  | 2.662590  | -2.252625 |
| C  | 2.941560  | 3.357714  | 1.074767  |
| H  | 2.567910  | 5.260283  | 2.013005  |
| H  | 3.247012  | 2.916372  | 2.038037  |
| C  | 3.729756  | -2.508724 | 1.711536  |
| C  | 4.052773  | -3.872975 | 1.882218  |
| C  | 3.639848  | -1.663607 | 2.839645  |
| C  | 4.274222  | -4.384843 | 3.170632  |
| H  | 4.142174  | -4.536012 | 1.007705  |
| C  | 3.858661  | -2.182797 | 4.127563  |
| H  | 3.406024  | -0.594634 | 2.702185  |
| C  | 4.174452  | -3.542445 | 4.293917  |
| H  | 4.532076  | -5.447815 | 3.298663  |
| H  | 3.792148  | -1.518613 | 5.003459  |
| H  | 4.353610  | -3.947241 | 5.302380  |
| C  | 4.500706  | -2.638169 | -1.125340 |
| C  | 4.242834  | -3.922999 | -1.655209 |
| C  | 5.689605  | -1.959926 | -1.475136 |
| C  | 5.173993  | -4.523234 | -2.518988 |
| H  | 3.308287  | -4.449492 | -1.403832 |
| C  | 6.618099  | -2.568206 | -2.336056 |
| H  | 5.879861  | -0.950301 | -1.074586 |
| C  | 6.361677  | -3.848898 | -2.857414 |
| H  | 4.969794  | -5.523511 | -2.932107 |
| H  | 7.543076  | -2.035519 | -2.606259 |
| H  | 7.088057  | -4.322513 | -3.536289 |
| C  | 1.680960  | -2.445786 | -0.356869 |
| C  | 0.784960  | -2.830975 | 0.663457  |
| C  | 1.243995  | -2.442761 | -1.702340 |
| C  | -0.524740 | -3.224770 | 0.341592  |
| H  | 1.116023  | -2.836162 | 1.713832  |
| C  | -0.066760 | -2.836192 | -2.018904 |
| H  | 1.935905  | -2.140240 | -2.504981 |
| C  | -0.953437 | -3.228284 | -0.997820 |
| H  | -1.212820 | -3.536802 | 1.140327  |
| H  | -0.396407 | -2.838274 | -3.069901 |
| H  | -1.979241 | -3.545127 | -1.241498 |
| Au | 3.299430  | 0.536163  | -0.033067 |
| H  | 1.932575  | 5.012310  | -2.306366 |
| N  | 1.650821  | 6.636529  | -0.141931 |
| C  | 1.362965  | 7.297764  | -1.406082 |
| H  | 0.927499  | 8.294587  | -1.208506 |
| H  | 2.274476  | 7.432355  | -2.034041 |
| H  | 0.622177  | 6.718070  | -1.997241 |
| C  | 1.727903  | 7.439996  | 1.069835  |
| H  | 2.778838  | 7.624313  | 1.393479  |
| H  | 1.244176  | 8.418357  | 0.892838  |
| H  | 1.191897  | 6.947569  | 1.909223  |

---

**[(PPh<sub>3</sub>)Au(*para*-aniline)--(PPh<sub>3</sub>)Au(alkene)]<sup>+</sup> TS Markovnikov**

-3018.05949556 A.U.

|    |           |           |           |
|----|-----------|-----------|-----------|
| P  | 3.764235  | -1.198265 | -0.039651 |
| H  | -0.843726 | -0.019007 | -1.497191 |
| C  | -0.015433 | 0.702110  | -1.348928 |
| C  | -0.148638 | 1.501496  | -0.114732 |
| C  | 1.380307  | 3.416700  | -0.796039 |
| C  | 0.845002  | 2.566839  | 0.199033  |
| C  | 2.340048  | 4.388588  | -0.467852 |
| C  | 1.293848  | 2.725621  | 1.532252  |
| C  | 2.784345  | 4.528206  | 0.859454  |
| H  | 2.751517  | 5.036401  | -1.257942 |
| C  | 2.259874  | 3.687820  | 1.860208  |
| H  | 0.884449  | 2.066667  | 2.315150  |
| H  | 3.541399  | 5.286288  | 1.114768  |
| H  | 2.608384  | 3.784060  | 2.900559  |
| C  | 5.087304  | 0.078372  | -0.201972 |
| C  | 6.453663  | -0.244095 | -0.349826 |
| C  | 4.693660  | 1.437634  | -0.162576 |
| C  | 7.413201  | 0.779265  | -0.433632 |
| H  | 6.778310  | -1.292596 | -0.418867 |
| C  | 5.659966  | 2.453416  | -0.234637 |
| H  | 3.628139  | 1.712126  | -0.090467 |
| C  | 7.020945  | 2.127843  | -0.367925 |
| H  | 8.475983  | 0.517645  | -0.554964 |
| H  | 5.334735  | 3.504403  | -0.197686 |
| H  | 7.777211  | 2.925709  | -0.433159 |
| C  | 4.406254  | -2.785703 | -0.683582 |
| C  | 5.476944  | -3.475475 | -0.065950 |
| C  | 3.797957  | -3.330627 | -1.836421 |
| C  | 5.936983  | -4.687053 | -0.606375 |
| H  | 5.943079  | -3.073310 | 0.847458  |
| C  | 4.263151  | -4.543637 | -2.372272 |
| H  | 2.954948  | -2.798004 | -2.307117 |
| C  | 5.332897  | -5.220226 | -1.760235 |
| H  | 6.770646  | -5.219576 | -0.122611 |
| H  | 3.787022  | -4.962027 | -3.272667 |
| H  | 5.696343  | -6.170625 | -2.181404 |
| C  | 3.523286  | -1.428372 | 1.779237  |
| C  | 3.236971  | -0.276701 | 2.548242  |
| C  | 3.451907  | -2.700713 | 2.385284  |
| C  | 2.886937  | -0.399789 | 3.901360  |
| H  | 3.275548  | 0.721824  | 2.085293  |
| C  | 3.101440  | -2.817362 | 3.742920  |
| H  | 3.657329  | -3.610590 | 1.801602  |
| C  | 2.815431  | -1.670629 | 4.502979  |
| H  | 2.668369  | 0.504454  | 4.491179  |
| H  | 3.049165  | -3.815297 | 4.205552  |
| H  | 2.539222  | -1.765947 | 5.564617  |
| Au | 1.751522  | -0.374954 | -0.879620 |
| H  | 0.147940  | 1.290378  | -2.273698 |
| H  | -0.410179 | 0.907491  | 0.777315  |
| H  | 1.046674  | 3.307553  | -1.837864 |
| P  | -3.657570 | -1.408071 | 0.053526  |
| C  | -1.623703 | 4.796271  | 1.015111  |
| C  | -1.484004 | 5.465390  | -0.248336 |
| C  | -1.844544 | 3.430090  | 1.066786  |
| C  | -1.654905 | 4.678086  | -1.439864 |
| C  | -1.940759 | 2.605169  | -0.108214 |
| H  | -1.899058 | 2.949831  | 2.058078  |
| C  | -1.873917 | 3.312920  | -1.356172 |
| H  | -1.583937 | 5.146210  | -2.430581 |
| H  | -1.940439 | 2.735802  | -2.293804 |
| C  | -4.444702 | -2.087958 | -1.454931 |
| C  | -5.189180 | -3.287013 | -1.423650 |
| C  | -4.250772 | -1.409945 | -2.679313 |
| C  | -5.729116 | -3.804166 | -2.613100 |
| H  | -5.354561 | -3.812457 | -0.469862 |
| C  | -4.787904 | -1.936617 | -3.865356 |
| H  | -3.682214 | -0.464954 | -2.697571 |
| C  | -5.527213 | -3.132968 | -3.832868 |
| H  | -6.314930 | -4.736187 | -2.585743 |
| H  | -4.636605 | -1.405102 | -4.817781 |

---

|    |           |           |           |
|----|-----------|-----------|-----------|
| H  | -5.955026 | -3.540604 | -4.762145 |
| C  | -4.630478 | -2.009392 | 1.481325  |
| C  | -4.374757 | -3.261121 | 2.084059  |
| C  | -5.684013 | -1.197024 | 1.955355  |
| C  | -5.180738 | -3.698072 | 3.149009  |
| H  | -3.543014 | -3.888603 | 1.725514  |
| C  | -6.487620 | -1.643239 | 3.017047  |
| H  | -5.866023 | -0.212830 | 1.492729  |
| C  | -6.237033 | -2.892943 | 3.612937  |
| H  | -4.981499 | -4.673327 | 3.620145  |
| H  | -7.308956 | -1.009347 | 3.385788  |
| H  | -6.864952 | -3.239091 | 4.448800  |
| C  | -2.012188 | -2.237719 | 0.170225  |
| C  | -1.502563 | -3.050492 | -0.862106 |
| C  | -1.204547 | -1.940989 | 1.294312  |
| C  | -0.196663 | -3.566215 | -0.764866 |
| H  | -2.121541 | -3.277849 | -1.744074 |
| C  | 0.092798  | -2.462954 | 1.389512  |
| H  | -1.596500 | -1.292380 | 2.095372  |
| C  | 0.598433  | -3.276634 | 0.356057  |
| H  | 0.203126  | -4.195554 | -1.575064 |
| H  | 0.723595  | -2.223431 | 2.259278  |
| H  | 1.620866  | -3.678084 | 0.421895  |
| Au | -3.071582 | 0.837939  | -0.007012 |
| H  | -1.534350 | 5.356872  | 1.954613  |
| N  | -1.179040 | 6.795402  | -0.315494 |
| C  | -0.922437 | 7.557808  | 0.905746  |
| H  | -0.637599 | 8.590993  | 0.638320  |
| H  | -1.823630 | 7.609220  | 1.554783  |
| H  | -0.091369 | 7.111294  | 1.493490  |
| C  | -1.032225 | 7.457556  | -1.610120 |
| H  | -1.959140 | 7.375499  | -2.217070 |
| H  | -0.827207 | 8.531142  | -1.450793 |
| H  | -0.190475 | 7.028130  | -2.197514 |

**[(PPh<sub>3</sub>)Au(*para*-aniline)--(PPh<sub>3</sub>)Au(alkene)]<sup>+</sup> Intermediate Markovnikov**  
-3018.09087586 A.U.

|   |           |           |           |
|---|-----------|-----------|-----------|
| P | 4.113653  | -0.427318 | -0.095070 |
| H | -0.691342 | 0.108288  | -1.299581 |
| C | 0.049712  | 0.925837  | -1.128374 |
| C | -0.397152 | 1.816744  | 0.058348  |
| C | 0.709719  | 4.026213  | -0.617925 |
| C | 0.598827  | 2.954319  | 0.291177  |
| C | 1.690785  | 5.017936  | -0.443169 |
| C | 1.485365  | 2.905288  | 1.389019  |
| C | 2.570947  | 4.958179  | 0.652709  |
| H | 1.766777  | 5.845321  | -1.166458 |
| C | 2.462378  | 3.898717  | 1.571055  |
| H | 1.426695  | 2.060013  | 2.095035  |
| H | 3.336492  | 5.737286  | 0.792943  |
| H | 3.145306  | 3.843543  | 2.433672  |
| C | 5.275494  | 0.924645  | -0.563411 |
| C | 6.658059  | 0.714744  | -0.754480 |
| C | 4.741049  | 2.228860  | -0.687487 |
| C | 7.496644  | 1.801665  | -1.053684 |
| H | 7.083920  | -0.297560 | -0.683085 |
| C | 5.588572  | 3.312333  | -0.970008 |
| H | 3.658958  | 2.400131  | -0.561923 |
| C | 6.966173  | 3.101045  | -1.154372 |
| H | 8.573551  | 1.631322  | -1.209029 |
| H | 5.159203  | 4.323000  | -1.052339 |
| H | 7.629507  | 3.949300  | -1.385654 |
| C | 4.835732  | -2.011091 | -0.673148 |
| C | 5.952292  | -2.615826 | -0.050710 |
| C | 4.237168  | -2.634513 | -1.791019 |
| C | 6.465060  | -3.824891 | -0.549553 |
| H | 6.412774  | -2.148470 | 0.834425  |
| C | 4.756162  | -3.842237 | -2.287201 |
| H | 3.354530  | -2.168576 | -2.260005 |
| C | 5.869964  | -4.437354 | -1.668039 |
| H | 7.334421  | -4.292413 | -0.061210 |
| H | 4.287493  | -4.321770 | -3.160850 |
| H | 6.275101  | -5.385211 | -2.055762 |
| C | 4.187893  | -0.482243 | 1.748609  |

---

|    |           |           |           |
|----|-----------|-----------|-----------|
| C  | 4.255057  | 0.730865  | 2.469362  |
| C  | 4.020415  | -1.695827 | 2.452341  |
| C  | 4.150304  | 0.727679  | 3.869925  |
| H  | 4.387009  | 1.683178  | 1.932773  |
| C  | 3.919931  | -1.693488 | 3.854517  |
| H  | 3.974121  | -2.650687 | 1.905986  |
| C  | 3.980003  | -0.482370 | 4.566709  |
| H  | 4.209169  | 1.679263  | 4.421709  |
| H  | 3.798299  | -2.646704 | 4.392866  |
| H  | 3.903269  | -0.482652 | 5.665218  |
| Au | 1.932532  | 0.113185  | -0.739226 |
| H  | 0.097371  | 1.525251  | -2.065445 |
| H  | -0.369859 | 1.195110  | 0.980495  |
| H  | 0.025613  | 4.083416  | -1.480488 |
| P  | -3.141860 | -1.894008 | 0.091863  |
| C  | -3.607001 | 3.728268  | 1.054311  |
| C  | -4.182065 | 4.087823  | -0.209754 |
| C  | -2.485664 | 2.905793  | 1.126185  |
| C  | -3.568774 | 3.546474  | -1.386087 |
| C  | -1.845568 | 2.360267  | -0.044474 |
| H  | -2.035438 | 2.696295  | 2.110504  |
| C  | -2.444935 | 2.724117  | -1.301984 |
| H  | -3.973000 | 3.773583  | -2.380817 |
| H  | -1.974711 | 2.360747  | -2.229018 |
| C  | -3.887507 | -2.631003 | -1.406767 |
| C  | -4.669243 | -3.803949 | -1.342104 |
| C  | -3.627152 | -2.019440 | -2.654691 |
| C  | -5.183849 | -4.361847 | -2.525330 |
| H  | -4.881717 | -4.279128 | -0.371692 |
| C  | -4.137380 | -2.589035 | -3.831389 |
| H  | -3.022174 | -1.098457 | -2.700930 |
| C  | -4.917335 | -3.759053 | -3.767206 |
| H  | -5.798618 | -5.273858 | -2.473996 |
| H  | -3.931251 | -2.113631 | -4.802897 |
| H  | -5.323612 | -4.200009 | -4.690818 |
| C  | -3.981336 | -2.617269 | 1.542671  |
| C  | -3.550711 | -3.850588 | 2.080325  |
| C  | -5.095719 | -1.949539 | 2.095823  |
| C  | -4.244083 | -4.414359 | 3.164139  |
| H  | -2.672129 | -4.362718 | 1.656667  |
| C  | -5.784323 | -2.522253 | 3.177258  |
| H  | -5.414004 | -0.979015 | 1.680419  |
| C  | -5.359573 | -3.753349 | 3.710244  |
| H  | -3.908946 | -5.374269 | 3.586841  |
| H  | -6.652562 | -2.002183 | 3.610750  |
| H  | -5.897944 | -4.197492 | 4.562024  |
| C  | -1.395182 | -2.466535 | 0.150160  |
| C  | -0.838999 | -3.285382 | -0.853503 |
| C  | -0.584733 | -1.999327 | 1.211112  |
| C  | 0.521395  | -3.639398 | -0.787091 |
| H  | -1.461236 | -3.643868 | -1.688012 |
| C  | 0.768638  | -2.357368 | 1.270014  |
| H  | -1.010166 | -1.337901 | 1.983991  |
| C  | 1.322400  | -3.181096 | 0.270710  |
| H  | 0.958783  | -4.272731 | -1.574323 |
| H  | 1.402442  | -1.975205 | 2.084401  |
| H  | 2.389250  | -3.449620 | 0.301825  |
| Au | -2.964223 | 0.392556  | 0.040421  |
| H  | -4.040178 | 4.102780  | 1.990578  |
| N  | -5.277335 | 4.908755  | -0.287471 |
| C  | -5.858412 | 5.478163  | 0.925002  |
| H  | -6.728087 | 6.103528  | 0.654925  |
| H  | -6.213497 | 4.686657  | 1.621247  |
| H  | -5.131932 | 6.120757  | 1.470605  |
| C  | -5.827902 | 5.278214  | -1.588348 |
| H  | -6.155831 | 4.384443  | -2.163452 |
| H  | -6.710769 | 5.925747  | -1.441418 |
| H  | -5.092231 | 5.838882  | -2.207269 |

**[(PPh<sub>3</sub>)Au(*para*-aniline-alkene)] Markovnikov**

-1846.54317581 A.U.

|   |          |           |           |
|---|----------|-----------|-----------|
| H | 2.309518 | -3.094562 | -0.056959 |
| C | 2.167604 | -2.023673 | -0.324349 |
| C | 3.099886 | -1.122244 | 0.526766  |

---

|    |           |           |           |
|----|-----------|-----------|-----------|
| C  | 5.117698  | -2.316998 | -0.569618 |
| C  | 4.603671  | -1.326019 | 0.290780  |
| C  | 6.505791  | -2.476472 | -0.746098 |
| C  | 5.526632  | -0.497597 | 0.972697  |
| C  | 7.408497  | -1.646967 | -0.062242 |
| H  | 6.881307  | -3.258544 | -1.426141 |
| C  | 6.910218  | -0.653738 | 0.802749  |
| H  | 5.141705  | 0.291185  | 1.640051  |
| H  | 8.494601  | -1.770845 | -0.200670 |
| H  | 7.606931  | 0.005564  | 1.345892  |
| H  | 2.435663  | -1.921323 | -1.402231 |
| H  | 2.920944  | -1.382766 | 1.595729  |
| H  | 4.425988  | -2.978441 | -1.111805 |
| P  | -1.965611 | -0.459912 | -0.032326 |
| C  | 1.370997  | 2.274832  | 1.120989  |
| C  | 1.691597  | 3.010769  | -0.054513 |
| C  | 1.878628  | 0.983844  | 1.317436  |
| C  | 2.557700  | 2.384695  | -0.996257 |
| C  | 2.704153  | 0.346782  | 0.368821  |
| H  | 1.610255  | 0.437498  | 2.237821  |
| C  | 3.039686  | 1.084950  | -0.783247 |
| H  | 2.854157  | 2.911006  | -1.914476 |
| H  | 3.697702  | 0.626366  | -1.539678 |
| C  | -1.971880 | 1.273705  | -0.655859 |
| C  | -2.950929 | 2.206842  | -0.246320 |
| C  | -0.973962 | 1.663598  | -1.575274 |
| C  | -2.948154 | 3.506960  | -0.779821 |
| H  | -3.710204 | 1.917650  | 0.498098  |
| C  | -0.980484 | 2.963137  | -2.107438 |
| H  | -0.175293 | 0.955249  | -1.849578 |
| C  | -1.969151 | 3.882183  | -1.718599 |
| H  | -3.712238 | 4.232181  | -0.457575 |
| H  | -0.194568 | 3.258466  | -2.819073 |
| H  | -1.964403 | 4.903617  | -2.131232 |
| C  | -2.628921 | -0.282546 | 1.677737  |
| C  | -3.940814 | -0.648938 | 2.042015  |
| C  | -1.756924 | 0.261434  | 2.648556  |
| C  | -4.376877 | -0.466781 | 3.367435  |
| H  | -4.622260 | -1.078086 | 1.290536  |
| C  | -2.200166 | 0.446559  | 3.966779  |
| H  | -0.730384 | 0.538671  | 2.359506  |
| C  | -3.511078 | 0.081777  | 4.329091  |
| H  | -5.402003 | -0.756631 | 3.648134  |
| H  | -1.516257 | 0.871564  | 4.718530  |
| H  | -3.855937 | 0.221747  | 5.365867  |
| C  | -3.302203 | -1.329642 | -0.952950 |
| C  | -4.351315 | -0.662331 | -1.620584 |
| C  | -3.260346 | -2.742470 | -0.953784 |
| C  | -5.353790 | -1.403848 | -2.270118 |
| H  | -4.383074 | 0.438206  | -1.640730 |
| C  | -4.269893 | -3.477872 | -1.595454 |
| H  | -2.422519 | -3.259449 | -0.456563 |
| C  | -5.318157 | -2.809622 | -2.254276 |
| H  | -6.167608 | -0.877764 | -2.794107 |
| H  | -4.230965 | -4.578591 | -1.590770 |
| H  | -6.105209 | -3.386808 | -2.765078 |
| Au | 0.164527  | -1.428495 | -0.163372 |
| H  | 0.727305  | 2.712995  | 1.895987  |
| N  | 1.177258  | 4.285651  | -0.274555 |
| C  | 0.232822  | 4.851422  | 0.668345  |
| H  | -0.189520 | 5.785673  | 0.251842  |
| H  | -0.619491 | 4.157664  | 0.839094  |
| H  | 0.689796  | 5.090496  | 1.660173  |
| C  | 1.723288  | 5.112186  | -1.332331 |
| H  | 1.533044  | 4.687084  | -2.346172 |
| H  | 1.249615  | 6.111610  | -1.301319 |
| H  | 2.826160  | 5.252080  | -1.236333 |

**[(PPh<sub>3</sub>)Au(*ortho*-aniline)+(PPh<sub>3</sub>)Au(alkene)]<sup>+</sup> adduct**  
3018.07337739 A.U.

|   |           |           |           |
|---|-----------|-----------|-----------|
| P | 3.730422  | -0.984680 | -0.017742 |
| H | -0.940076 | 0.265887  | -1.447460 |
| C | -0.111877 | 0.991449  | -1.420820 |
| C | 0.198307  | 1.591927  | -0.188399 |



---

|    |           |           |           |
|----|-----------|-----------|-----------|
| C  | 1.715065  | 3.469046  | -0.972428 |
| C  | 1.065250  | 2.748219  | 0.063489  |
| C  | 2.569065  | 4.532697  | -0.668264 |
| C  | 1.300807  | 3.126433  | 1.408275  |
| C  | 2.801911  | 4.894674  | 0.676592  |
| H  | 3.066140  | 5.084692  | -1.480761 |
| C  | 2.167784  | 4.188505  | 1.711690  |
| H  | 0.786301  | 2.581446  | 2.213986  |
| H  | 3.475800  | 5.733022  | 0.912587  |
| H  | 2.337339  | 4.474262  | 2.761074  |
| C  | 5.049838  | 0.273180  | -0.294629 |
| C  | 6.341827  | -0.070238 | -0.748736 |
| C  | 4.735031  | 1.631745  | -0.052693 |
| C  | 7.312148  | 0.931168  | -0.927784 |
| H  | 6.597712  | -1.113727 | -0.982934 |
| C  | 5.712985  | 2.622715  | -0.224085 |
| H  | 3.719571  | 1.934587  | 0.247280  |
| C  | 7.004947  | 2.275453  | -0.657248 |
| H  | 8.315561  | 0.654090  | -1.286570 |
| H  | 5.448777  | 3.673576  | -0.030713 |
| H  | 7.769351  | 3.055321  | -0.798270 |
| C  | 4.286329  | -2.570211 | -0.727775 |
| C  | 5.427919  | -3.244044 | -0.229138 |
| C  | 3.560307  | -3.127292 | -1.803806 |
| C  | 5.827978  | -4.462083 | -0.801987 |
| H  | 6.004127  | -2.821394 | 0.609066  |
| C  | 3.967396  | -4.345547 | -2.372288 |
| H  | 2.670371  | -2.604157 | -2.189535 |
| C  | 5.098593  | -5.013721 | -1.871352 |
| H  | 6.715355  | -4.983272 | -0.410672 |
| H  | 3.398450  | -4.773915 | -3.211912 |
| H  | 5.415636  | -5.969280 | -2.317239 |
| C  | 3.562191  | -1.202612 | 1.809542  |
| C  | 3.130471  | -0.081155 | 2.556854  |
| C  | 3.709887  | -2.449380 | 2.452408  |
| C  | 2.867196  | -0.206230 | 3.928837  |
| H  | 2.973217  | 0.892626  | 2.066416  |
| C  | 3.438706  | -2.568487 | 3.827800  |
| H  | 4.017258  | -3.340963 | 1.886781  |
| C  | 3.018753  | -1.450929 | 4.568430  |
| H  | 2.532700  | 0.673284  | 4.500731  |
| H  | 3.553935  | -3.546841 | 4.319548  |
| H  | 2.804533  | -1.549651 | 5.643840  |
| Au | 1.690214  | -0.142331 | -0.746814 |
| H  | 0.145381  | 1.472214  | -2.378665 |
| H  | -0.308983 | 1.184972  | 0.704104  |
| H  | 1.558508  | 3.181045  | -2.022740 |
| P  | -3.385365 | -1.266809 | 0.127750  |
| C  | -1.403700 | 4.921617  | -0.356445 |
| C  | -2.114570 | 3.700899  | -0.484323 |
| C  | -1.054813 | 5.425906  | 0.904607  |
| C  | -2.461753 | 2.957848  | 0.694317  |
| C  | -1.426591 | 4.732085  | 2.068439  |
| H  | -0.500582 | 6.374901  | 0.975250  |
| C  | -2.123521 | 3.514952  | 1.950031  |
| H  | -1.169674 | 5.132074  | 3.062207  |
| H  | -2.390519 | 2.965775  | 2.868104  |
| C  | -1.716001 | -2.049076 | 0.242806  |
| C  | -1.174598 | -2.847179 | -0.786323 |
| C  | -0.959758 | -1.807774 | 1.413829  |
| C  | 0.104750  | -3.413387 | -0.634205 |
| H  | -1.753020 | -3.028598 | -1.705817 |
| C  | 0.311156  | -2.382810 | 1.566155  |
| H  | -1.373751 | -1.164362 | 2.207914  |
| C  | 0.842049  | -3.190641 | 0.541450  |
| H  | 0.525937  | -4.038691 | -1.436893 |
| H  | 0.898076  | -2.193646 | 2.477826  |
| H  | 1.840340  | -3.639151 | 0.654830  |
| C  | -3.920540 | -1.594185 | -1.601139 |
| C  | -4.652475 | -2.747682 | -1.954730 |
| C  | -3.543017 | -0.668180 | -2.601480 |
| C  | -4.993284 | -2.976362 | -3.299449 |
| H  | -4.963685 | -3.465071 | -1.179066 |
| C  | -3.880603 | -0.907032 | -3.943360 |

---

|    |           |           |           |
|----|-----------|-----------|-----------|
| H  | -2.998859 | 0.250435  | -2.323505 |
| C  | -4.605388 | -2.061177 | -4.294203 |
| H  | -5.570119 | -3.874532 | -3.570145 |
| H  | -3.587792 | -0.180949 | -4.718070 |
| H  | -4.877777 | -2.242567 | -5.345697 |
| C  | -4.462953 | -2.282728 | 1.203402  |
| C  | -4.185607 | -3.639937 | 1.479534  |
| C  | -5.622873 | -1.675407 | 1.733375  |
| C  | -5.074157 | -4.385104 | 2.272804  |
| H  | -3.274106 | -4.111667 | 1.078586  |
| C  | -6.508586 | -2.428464 | 2.521353  |
| H  | -5.823106 | -0.610168 | 1.530599  |
| C  | -6.235572 | -3.782196 | 2.789942  |
| H  | -4.857889 | -5.442958 | 2.489679  |
| H  | -7.412472 | -1.953799 | 2.933677  |
| H  | -6.928796 | -4.369651 | 3.412119  |
| Au | -3.118630 | 1.013354  | 0.549849  |
| H  | -1.128369 | 5.501789  | -1.248549 |
| N  | -2.452956 | 3.187183  | -1.771528 |
| C  | -1.745628 | 3.735788  | -2.920703 |
| H  | -1.902399 | 3.069862  | -3.795071 |
| H  | -2.093663 | 4.758625  | -3.216980 |
| H  | -0.658699 | 3.790118  | -2.716435 |
| C  | -3.885573 | 3.032100  | -2.054148 |
| H  | -4.412762 | 2.625051  | -1.170983 |
| H  | -4.357692 | 4.009487  | -2.325755 |
| H  | -4.037104 | 2.328165  | -2.899028 |

**[(PPh<sub>3</sub>)Au(*ortho*-aniline)--(PPh<sub>3</sub>)Au(alkene)]<sup>+</sup> TS Markovnikov**  
-3018.05945093 A.U.

|   |           |           |           |
|---|-----------|-----------|-----------|
| P | 3.793603  | -1.066703 | 0.033770  |
| H | -0.791026 | -0.085087 | -1.671775 |
| C | 0.044974  | 0.638843  | -1.607723 |
| C | -0.063085 | 1.572281  | -0.480913 |
| C | 1.447464  | 3.407751  | -1.371850 |
| C | 0.927940  | 2.661458  | -0.287731 |
| C | 2.400683  | 4.412734  | -1.152231 |
| C | 1.400744  | 2.941792  | 1.016804  |
| C | 2.857335  | 4.688233  | 0.151085  |
| H | 2.790988  | 4.989313  | -2.005343 |
| C | 2.358301  | 3.943496  | 1.235801  |
| H | 1.029095  | 2.341279  | 1.861579  |
| H | 3.605558  | 5.478248  | 0.320292  |
| H | 2.723573  | 4.140982  | 2.256123  |
| C | 5.130101  | 0.145022  | -0.340298 |
| C | 6.494210  | -0.212407 | -0.400016 |
| C | 4.751341  | 1.492608  | -0.551037 |
| C | 7.466775  | 0.771227  | -0.647943 |
| H | 6.806281  | -1.259421 | -0.270209 |
| C | 5.730885  | 2.471209  | -0.782376 |
| H | 3.687397  | 1.783324  | -0.548216 |
| C | 7.089614  | 2.113690  | -0.830545 |
| H | 8.528371  | 0.483336  | -0.700563 |
| H | 5.418347  | 3.515324  | -0.937658 |
| H | 7.856809  | 2.879966  | -1.022724 |
| C | 4.405450  | -2.752191 | -0.325860 |
| C | 5.432881  | -3.362584 | 0.432788  |
| C | 3.816465  | -3.457657 | -1.399013 |
| C | 5.866146  | -4.659044 | 0.111289  |
| H | 5.884375  | -2.831213 | 1.285668  |
| C | 4.255631  | -4.754221 | -1.715936 |
| H | 3.008673  | -2.983648 | -1.980836 |
| C | 5.279689  | -5.354513 | -0.962594 |
| H | 6.665132  | -5.130542 | 0.704498  |
| H | 3.794923  | -5.298258 | -2.555085 |
| H | 5.621844  | -6.371508 | -1.210233 |
| C | 3.551054  | -0.973822 | 1.863296  |
| C | 3.391396  | 0.305073  | 2.444739  |
| C | 3.360722  | -2.124443 | 2.658854  |
| C | 3.044272  | 0.426760  | 3.799049  |
| H | 3.531331  | 1.213074  | 1.838014  |
| C | 3.015630  | -1.995309 | 4.016584  |
| H | 3.476271  | -3.129005 | 2.224528  |
| C | 2.852295  | -0.722187 | 4.589183  |

---

|    |           |           |           |
|----|-----------|-----------|-----------|
| H  | 2.928637  | 1.428737  | 4.242037  |
| H  | 2.873708  | -2.899715 | 4.628646  |
| H  | 2.582489  | -0.624855 | 5.652334  |
| Au | 1.794809  | -0.381111 | -0.945271 |
| H  | 0.250706  | 1.097983  | -2.594256 |
| H  | -0.361555 | 1.094757  | 0.466106  |
| H  | 1.089115  | 3.203914  | -2.391024 |
| P  | -3.671221 | -1.161998 | 0.012398  |
| C  | -1.500376 | 5.189986  | -0.192080 |
| C  | -1.518427 | 5.443782  | -1.559606 |
| C  | -1.668627 | 3.865211  | 0.326957  |
| C  | -1.702698 | 4.400790  | -2.501275 |
| C  | -1.866430 | 2.773086  | -0.622472 |
| H  | -1.378306 | 6.479328  | -1.908883 |
| C  | -1.868665 | 3.110312  | -2.021106 |
| H  | -1.704186 | 4.611213  | -3.581340 |
| H  | -1.961100 | 2.282996  | -2.745128 |
| C  | -4.455183 | -2.015302 | -1.404867 |
| C  | -5.131406 | -3.243987 | -1.239493 |
| C  | -4.328688 | -1.445405 | -2.691134 |
| C  | -5.671715 | -3.897649 | -2.359031 |
| H  | -5.242512 | -3.685838 | -0.236726 |
| C  | -4.866376 | -2.108368 | -3.806870 |
| H  | -3.814394 | -0.477272 | -2.812090 |
| C  | -5.537583 | -3.333127 | -3.641075 |
| H  | -6.204737 | -4.852361 | -2.228948 |
| H  | -4.769212 | -1.661295 | -4.808368 |
| H  | -5.965955 | -3.847843 | -4.515295 |
| C  | -4.655299 | -1.562694 | 1.502468  |
| C  | -4.419166 | -2.734988 | 2.254331  |
| C  | -5.692020 | -0.678755 | 1.875851  |
| C  | -5.226099 | -3.022300 | 3.368113  |
| H  | -3.600645 | -3.417066 | 1.973988  |
| C  | -6.496231 | -0.975181 | 2.988448  |
| H  | -5.862436 | 0.242227  | 1.293917  |
| C  | -6.264020 | -2.145822 | 3.733774  |
| H  | -5.042351 | -3.935913 | 3.954834  |
| H  | -7.304799 | -0.286206 | 3.278182  |
| H  | -6.893162 | -2.373971 | 4.608335  |
| C  | -2.037240 | -1.988379 | 0.255047  |
| C  | -1.522131 | -2.922044 | -0.666011 |
| C  | -1.244648 | -1.574605 | 1.352753  |
| C  | -0.225542 | -3.439647 | -0.486282 |
| H  | -2.129957 | -3.243088 | -1.526416 |
| C  | 0.042953  | -2.098571 | 1.531314  |
| H  | -1.641024 | -0.835192 | 2.068375  |
| C  | 0.555486  | -3.031261 | 0.607488  |
| H  | 0.178886  | -4.162490 | -1.211654 |
| H  | 0.662025  | -1.770209 | 2.380140  |
| H  | 1.571579  | -3.433734 | 0.736101  |
| Au | -3.043194 | 1.049039  | -0.289432 |
| H  | -1.358253 | 6.039932  | 0.486523  |
| N  | -1.558480 | 3.682629  | 1.689570  |
| C  | -1.886856 | 2.458739  | 2.402888  |
| H  | -2.474209 | 2.695326  | 3.314339  |
| H  | -2.502135 | 1.785481  | 1.765937  |
| H  | -0.978107 | 1.893208  | 2.711624  |
| C  | -1.111622 | 4.784794  | 2.542715  |
| H  | -1.891925 | 5.569601  | 2.663472  |
| H  | -0.870032 | 4.385911  | 3.545391  |
| H  | -0.189904 | 5.251609  | 2.138309  |

**[(PPh<sub>3</sub>)Au(*ortho*-aniline-alkene)Au(PPh<sub>3</sub>)]<sup>+</sup> Intermediate Markovnikov**  
-3018.08738558 A.U.

|   |           |           |           |
|---|-----------|-----------|-----------|
| P | 3.949731  | -0.911956 | 0.000301  |
| H | -0.655439 | 0.047293  | -1.596841 |
| C | 0.157522  | 0.800684  | -1.459152 |
| C | -0.267181 | 1.857018  | -0.408387 |
| C | 0.966893  | 3.987205  | -1.105070 |
| C | 0.822533  | 2.912394  | -0.204751 |
| C | 2.016604  | 4.911571  | -0.959466 |
| C | 1.748889  | 2.789219  | 0.853726  |
| C | 2.933043  | 4.780828  | 0.099291  |
| H | 2.117371  | 5.741566  | -1.676622 |

---

|    |           |           |           |
|----|-----------|-----------|-----------|
| C  | 2.792658  | 3.716633  | 1.008618  |
| H  | 1.673369  | 1.935445  | 1.548498  |
| H  | 3.751511  | 5.507965  | 0.218416  |
| H  | 3.503306  | 3.605135  | 1.842734  |
| C  | 5.321102  | 0.160670  | -0.597722 |
| C  | 6.642912  | -0.302662 | -0.767754 |
| C  | 5.010887  | 1.514410  | -0.870448 |
| C  | 7.645329  | 0.585063  | -1.195117 |
| H  | 6.892545  | -1.358196 | -0.579526 |
| C  | 6.021582  | 2.398250  | -1.281254 |
| H  | 3.976055  | 1.879451  | -0.759583 |
| C  | 7.339102  | 1.935064  | -1.445931 |
| H  | 8.674103  | 0.217432  | -1.334004 |
| H  | 5.769031  | 3.451062  | -1.482828 |
| H  | 8.129743  | 2.625460  | -1.779325 |
| C  | 4.438573  | -2.656805 | -0.277031 |
| C  | 5.421171  | -3.304044 | 0.507592  |
| C  | 3.799231  | -3.363871 | -1.320222 |
| C  | 5.761600  | -4.640913 | 0.242878  |
| H  | 5.910809  | -2.765399 | 1.334714  |
| C  | 4.145927  | -4.700287 | -1.581432 |
| H  | 3.023226  | -2.859051 | -1.919638 |
| C  | 5.126349  | -5.338854 | -0.801216 |
| H  | 6.527073  | -5.141668 | 0.856140  |
| H  | 3.647299  | -5.246046 | -2.397723 |
| H  | 5.395746  | -6.387093 | -1.004832 |
| C  | 3.937151  | -0.686833 | 1.833528  |
| C  | 4.236986  | 0.577070  | 2.387289  |
| C  | 3.485160  | -1.722596 | 2.682266  |
| C  | 4.075587  | 0.802688  | 3.764557  |
| H  | 4.600889  | 1.388824  | 1.739128  |
| C  | 3.328736  | -1.492876 | 4.059840  |
| H  | 3.265336  | -2.719838 | 2.270097  |
| C  | 3.617517  | -0.228347 | 4.604264  |
| H  | 4.319390  | 1.791018  | 4.185495  |
| H  | 2.985161  | -2.311143 | 4.712313  |
| H  | 3.497751  | -0.050887 | 5.684446  |
| Au | 1.901252  | -0.178377 | -0.850135 |
| H  | 0.343627  | 1.280651  | -2.445791 |
| H  | -0.361889 | 1.313781  | 0.550290  |
| H  | 0.252357  | 4.102535  | -1.936743 |
| P  | -3.634189 | -1.282698 | 0.096611  |
| C  | -3.052395 | 4.547711  | -0.275956 |
| C  | -3.494157 | 4.538041  | -1.605685 |
| C  | -2.142566 | 3.575900  | 0.225541  |
| C  | -3.053464 | 3.555337  | -2.505834 |
| C  | -1.619561 | 2.568815  | -0.701058 |
| H  | -4.211320 | 5.306451  | -1.935000 |
| C  | -2.120116 | 2.601742  | -2.056621 |
| H  | -3.399187 | 3.540217  | -3.549447 |
| H  | -1.649962 | 1.925139  | -2.787465 |
| C  | -4.534678 | -2.321329 | -1.107982 |
| C  | -5.303159 | -3.426333 | -0.681303 |
| C  | -4.408079 | -2.033685 | -2.485469 |
| C  | -5.936825 | -4.240380 | -1.634592 |
| H  | -5.415173 | -3.646687 | 0.391881  |
| C  | -5.038461 | -2.858155 | -3.431570 |
| H  | -3.818539 | -1.161415 | -2.813720 |
| C  | -5.802929 | -3.959908 | -3.006662 |
| H  | -6.541899 | -5.098096 | -1.302226 |
| H  | -4.939671 | -2.633175 | -4.504757 |
| H  | -6.303984 | -4.599934 | -3.749499 |
| C  | -4.516385 | -1.363202 | 1.693367  |
| C  | -4.278207 | -2.416833 | 2.604461  |
| C  | -5.475299 | -0.369718 | 1.990553  |
| C  | -5.006802 | -2.474544 | 3.804332  |
| H  | -3.518719 | -3.182607 | 2.379619  |
| C  | -6.200601 | -0.437348 | 3.190864  |
| H  | -5.646681 | 0.457147  | 1.281538  |
| C  | -5.967265 | -1.488703 | 4.096452  |
| H  | -4.821414 | -3.293839 | 4.516238  |
| H  | -6.948441 | 0.336716  | 3.422730  |
| H  | -6.534370 | -1.537557 | 5.039112  |
| C  | -1.984068 | -2.053887 | 0.348781  |

---

|    |           |           |           |
|----|-----------|-----------|-----------|
| C  | -1.472599 | -3.003057 | -0.559282 |
| C  | -1.167151 | -1.565214 | 1.396193  |
| C  | -0.149788 | -3.459728 | -0.416959 |
| H  | -2.101349 | -3.382062 | -1.380062 |
| C  | 0.148826  | -2.026525 | 1.531579  |
| H  | -1.560844 | -0.817672 | 2.103724  |
| C  | 0.660008  | -2.971703 | 0.620650  |
| H  | 0.254017  | -4.194507 | -1.130339 |
| H  | 0.790298  | -1.635847 | 2.336351  |
| H  | 1.699669  | -3.320895 | 0.709241  |
| Au | -3.084340 | 0.837233  | -0.587877 |
| H  | -3.445135 | 5.318915  | 0.400805  |
| N  | -1.720787 | 3.629391  | 1.540296  |
| C  | -1.523085 | 2.431621  | 2.347911  |
| H  | -2.001047 | 2.578297  | 3.340060  |
| H  | -2.016775 | 1.558981  | 1.871259  |
| H  | -0.450394 | 2.190377  | 2.513238  |
| C  | -1.820721 | 4.873995  | 2.295037  |
| H  | -2.827274 | 5.031055  | 2.751194  |
| H  | -1.072180 | 4.856305  | 3.112163  |
| H  | -1.579707 | 5.739309  | 1.647910  |

**[(PPh<sub>3</sub>)Au(*ortho*-aniline-alkene)] Markovnikov**

-1846.53785899 A.U.

|    |           |           |           |
|----|-----------|-----------|-----------|
| P  | 2.263726  | -0.178595 | 0.066794  |
| H  | -1.937032 | -2.927194 | 0.551939  |
| C  | -1.749346 | -1.997707 | -0.029807 |
| C  | -2.728519 | -0.877797 | 0.414002  |
| C  | -2.582228 | 0.780671  | -1.534925 |
| C  | -2.306029 | 0.470329  | -0.187210 |
| C  | -2.113278 | 1.976507  | -2.108339 |
| C  | -1.531785 | 1.383422  | 0.562246  |
| C  | -1.348692 | 2.880723  | -1.347036 |
| H  | -2.344107 | 2.202932  | -3.162305 |
| C  | -1.054613 | 2.575401  | -0.004746 |
| H  | -1.283496 | 1.140919  | 1.607954  |
| H  | -0.972567 | 3.811196  | -1.801123 |
| H  | -0.437514 | 3.257313  | 0.602045  |
| C  | 2.600090  | 0.481122  | -1.618299 |
| C  | 3.890663  | 0.540807  | -2.183729 |
| C  | 1.489138  | 0.972778  | -2.342336 |
| C  | 4.067651  | 1.095555  | -3.464377 |
| H  | 4.757918  | 0.153556  | -1.625755 |
| C  | 1.676230  | 1.536339  | -3.613446 |
| H  | 0.477198  | 0.920622  | -1.908122 |
| C  | 2.964321  | 1.597276  | -4.177682 |
| H  | 5.076093  | 1.136185  | -3.906049 |
| H  | 0.804442  | 1.923546  | -4.164104 |
| H  | 3.108436  | 2.032390  | -5.179501 |
| C  | 3.828494  | -0.984096 | 0.594113  |
| C  | 4.899769  | -0.261465 | 1.163415  |
| C  | 3.949995  | -2.376562 | 0.391477  |
| C  | 6.085220  | -0.928188 | 1.517022  |
| H  | 4.802341  | 0.822798  | 1.333419  |
| C  | 5.139880  | -3.036477 | 0.740896  |
| H  | 3.100621  | -2.937689 | -0.032858 |
| C  | 6.207525  | -2.313500 | 1.303603  |
| H  | 6.918030  | -0.362533 | 1.964279  |
| H  | 5.230103  | -4.122591 | 0.581780  |
| H  | 7.137258  | -2.833426 | 1.584331  |
| C  | 2.134802  | 1.343733  | 1.101550  |
| C  | 2.581309  | 2.603293  | 0.650856  |
| C  | 1.512602  | 1.234092  | 2.364958  |
| C  | 2.406945  | 3.741449  | 1.457806  |
| H  | 3.048982  | 2.697800  | -0.341634 |
| C  | 1.341538  | 2.372688  | 3.167661  |
| H  | 1.138742  | 0.253339  | 2.702951  |
| C  | 1.785169  | 3.629262  | 2.713859  |
| H  | 2.751063  | 4.723707  | 1.097044  |
| H  | 0.847159  | 2.281710  | 4.147724  |
| H  | 1.639655  | 4.524076  | 3.339522  |
| Au | 0.236856  | -1.347347 | 0.104148  |
| H  | -1.921921 | -2.243328 | -1.103340 |
| H  | -2.609153 | -0.772980 | 1.515112  |

|   |           |           |           |
|---|-----------|-----------|-----------|
| H | -3.184197 | 0.077027  | -2.132420 |
| C | -6.521733 | -0.331697 | -0.039960 |
| C | -6.920523 | -1.524842 | -0.664742 |
| C | -5.186225 | -0.141848 | 0.380924  |
| C | -5.982859 | -2.548940 | -0.865631 |
| C | -4.210102 | -1.156746 | 0.122517  |
| H | -7.968491 | -1.656225 | -0.979604 |
| C | -4.644031 | -2.354226 | -0.476667 |
| H | -6.283362 | -3.495030 | -1.343351 |
| H | -3.908994 | -3.147632 | -0.677037 |
| H | -7.260774 | 0.463664  | 0.143369  |
| N | -4.775952 | 1.069983  | 0.990709  |
| C | -4.426029 | 1.058115  | 2.398553  |
| H | -5.303504 | 1.283482  | 3.059392  |
| H | -4.039729 | 0.064336  | 2.695172  |
| H | -3.633599 | 1.812295  | 2.608684  |
| C | -5.345304 | 2.317129  | 0.526505  |
| H | -6.339307 | 2.569091  | 0.983049  |
| H | -4.646756 | 3.147368  | 0.771993  |
| H | -5.459665 | 2.289105  | -0.575309 |

**[(PPh<sub>3</sub>)Au(*para*-aniline)--(PPh<sub>3</sub>)Au(alkene)]<sup>+</sup> TS anti-Markovnikov**

-3018.05850333 A.U.

|    |           |           |           |
|----|-----------|-----------|-----------|
| P  | -4.094414 | -0.168498 | -0.316174 |
| H  | 0.484221  | 0.009355  | -0.059308 |
| C  | 0.130504  | 1.035261  | 0.161955  |
| C  | 0.597090  | 2.003309  | -0.793348 |
| C  | 0.081027  | 0.183231  | 2.512906  |
| C  | 0.072483  | 1.292556  | 1.629611  |
| C  | 0.033689  | 0.362742  | 3.903015  |
| C  | -0.004070 | 2.591357  | 2.189089  |
| C  | -0.031005 | 1.659864  | 4.445837  |
| H  | 0.054537  | -0.516641 | 4.566470  |
| C  | -0.052341 | 2.770421  | 3.580486  |
| H  | -0.020774 | 3.470884  | 1.527775  |
| H  | -0.068132 | 1.805953  | 5.536551  |
| H  | -0.108104 | 3.788948  | 3.996405  |
| C  | -5.341688 | 0.944415  | 0.433402  |
| C  | -6.334464 | 0.458843  | 1.311913  |
| C  | -5.311113 | 2.313025  | 0.085075  |
| C  | -7.298559 | 1.341632  | 1.828261  |
| H  | -6.347999 | -0.604545 | 1.599233  |
| C  | -6.280142 | 3.187093  | 0.602441  |
| H  | -4.521568 | 2.690337  | -0.585843 |
| C  | -7.274048 | 2.702026  | 1.472740  |
| H  | -8.071910 | 0.963854  | 2.515158  |
| H  | -6.255501 | 4.253905  | 0.330954  |
| H  | -8.029968 | 3.390389  | 1.881878  |
| C  | -4.038025 | -1.646416 | 0.780855  |
| C  | -4.558011 | -2.898992 | 0.396714  |
| C  | -3.398758 | -1.503018 | 2.035176  |
| C  | -4.441522 | -4.000624 | 1.264730  |
| H  | -5.048384 | -3.020351 | -0.581889 |
| C  | -3.300159 | -2.601882 | 2.901286  |
| H  | -2.960325 | -0.534378 | 2.328530  |
| C  | -3.818449 | -3.853692 | 2.516488  |
| H  | -4.843676 | -4.978966 | 0.958879  |
| H  | -2.804148 | -2.482259 | 3.877022  |
| H  | -3.731867 | -4.718138 | 3.193092  |
| C  | -4.799075 | -0.725887 | -1.912619 |
| C  | -6.182156 | -0.983263 | -2.045669 |
| C  | -3.936573 | -0.923450 | -3.012964 |
| C  | -6.689605 | -1.454433 | -3.267558 |
| H  | -6.862762 | -0.808172 | -1.197154 |
| C  | -4.451034 | -1.396494 | -4.231618 |
| H  | -2.864152 | -0.691731 | -2.910308 |
| C  | -5.825664 | -1.665286 | -4.358369 |
| H  | -7.767796 | -1.652938 | -3.370504 |
| H  | -3.776979 | -1.546452 | -5.089365 |
| H  | -6.228761 | -2.031089 | -5.315620 |
| Au | -1.933872 | 0.673157  | -0.351265 |
| H  | 0.364435  | 3.072808  | -0.671438 |
| H  | 0.681701  | 1.668095  | -1.837478 |
| H  | 0.121640  | -0.831120 | 2.086024  |

---

|    |           |           |           |
|----|-----------|-----------|-----------|
| P  | 3.147601  | -1.933452 | -0.095260 |
| C  | 3.083228  | 4.501868  | -1.869525 |
| C  | 3.048053  | 5.297780  | -0.674829 |
| C  | 2.969365  | 3.119119  | -1.807848 |
| C  | 2.896340  | 4.604773  | 0.570631  |
| C  | 2.783437  | 2.401632  | -0.576558 |
| H  | 2.998449  | 2.554258  | -2.754751 |
| C  | 2.784587  | 3.218370  | 0.607686  |
| H  | 2.878657  | 5.159900  | 1.518298  |
| H  | 2.680233  | 2.732678  | 1.590119  |
| C  | 3.345692  | -2.477779 | 1.645993  |
| C  | 3.721141  | -3.796822 | 1.980863  |
| C  | 3.043830  | -1.550189 | 2.668298  |
| C  | 3.783759  | -4.182907 | 3.330722  |
| H  | 3.971558  | -4.520810 | 1.189332  |
| C  | 3.096134  | -1.946641 | 4.014300  |
| H  | 2.761474  | -0.517037 | 2.408418  |
| C  | 3.466712  | -3.262334 | 4.346748  |
| H  | 4.084498  | -5.209994 | 3.590264  |
| H  | 2.853691  | -1.218180 | 4.803786  |
| H  | 3.518129  | -3.570464 | 5.402874  |
| C  | 4.191191  | -3.026602 | -1.125878 |
| C  | 3.738460  | -4.292475 | -1.560045 |
| C  | 5.488702  | -2.584617 | -1.465741 |
| C  | 4.588024  | -5.113519 | -2.320284 |
| H  | 2.719959  | -4.630883 | -1.310260 |
| C  | 6.333067  | -3.412774 | -2.223477 |
| H  | 5.829432  | -1.587626 | -1.140822 |
| C  | 5.884104  | -4.676102 | -2.649597 |
| H  | 4.234816  | -6.099769 | -2.659943 |
| H  | 7.344097  | -3.066636 | -2.488752 |
| H  | 6.546058  | -5.321588 | -3.247879 |
| C  | 1.403097  | -2.368791 | -0.528579 |
| C  | 0.493700  | -2.901053 | 0.408928  |
| C  | 0.950766  | -2.025631 | -1.824850 |
| C  | -0.858040 | -3.075761 | 0.057202  |
| H  | 0.840950  | -3.173462 | 1.417999  |
| C  | -0.394588 | -2.213573 | -2.173366 |
| H  | 1.656741  | -1.596285 | -2.554788 |
| C  | -1.302775 | -2.731183 | -1.230012 |
| H  | -1.571620 | -3.474362 | 0.794051  |
| H  | -0.737988 | -1.948715 | -3.185622 |
| H  | -2.362094 | -2.864595 | -1.496592 |
| Au | 3.228615  | 0.377147  | -0.397710 |
| H  | 3.212210  | 4.978314  | -2.850691 |
| N  | 3.160690  | 6.664327  | -0.725931 |
| C  | 3.346138  | 7.343047  | -2.005172 |
| H  | 3.411839  | 8.432746  | -1.835269 |
| H  | 4.281699  | 7.019360  | -2.512830 |
| H  | 2.495209  | 7.157151  | -2.697229 |
| C  | 3.131123  | 7.451790  | 0.502612  |
| H  | 3.967439  | 7.183938  | 1.185945  |
| H  | 3.226182  | 8.523924  | 0.253324  |
| H  | 2.175823  | 7.313531  | 1.055759  |

**[(PPh<sub>3</sub>)Au(*para*-aniline-alkene)Au(PPh<sub>3</sub>)]<sup>+</sup> Intermediate anti-Markovnikov**

-3018.09912429 A.U.

|   |           |           |           |
|---|-----------|-----------|-----------|
| P | -4.364515 | 0.137743  | -0.343680 |
| H | 0.294346  | 0.534807  | -0.316727 |
| C | -0.172622 | 1.479101  | 0.057087  |
| C | 0.482451  | 2.640685  | -0.720001 |
| C | 0.081495  | 0.254405  | 2.255371  |
| C | -0.047879 | 1.484727  | 1.558445  |
| C | 0.169872  | 0.208974  | 3.655134  |
| C | -0.099157 | 2.668631  | 2.335142  |
| C | 0.135584  | 1.397386  | 4.409070  |
| H | 0.273052  | -0.765976 | 4.159369  |
| C | -0.004748 | 2.625982  | 3.736926  |
| H | -0.223695 | 3.642076  | 1.834175  |
| H | 0.206203  | 1.367322  | 5.507453  |
| H | -0.047800 | 3.564895  | 4.312182  |
| C | -5.684217 | 1.253587  | 0.273144  |
| C | -6.721426 | 0.801725  | 1.117212  |
| C | -5.649819 | 2.603588  | -0.142419 |

---

|    |           |           |           |
|----|-----------|-----------|-----------|
| C  | -7.724275 | 1.695983  | 1.530616  |
| H  | -6.741237 | -0.245635 | 1.458064  |
| C  | -6.658009 | 3.489151  | 0.270098  |
| H  | -4.824884 | 2.957540  | -0.782956 |
| C  | -7.695820 | 3.036121  | 1.105677  |
| H  | -8.531430 | 1.342913  | 2.191427  |
| H  | -6.629316 | 4.540759  | -0.055358 |
| H  | -8.482287 | 3.733877  | 1.433364  |
| C  | -4.402965 | -1.310343 | 0.799185  |
| C  | -5.117468 | -2.492032 | 0.509574  |
| C  | -3.686028 | -1.205871 | 2.014490  |
| C  | -5.126776 | -3.552468 | 1.434990  |
| H  | -5.664209 | -2.590020 | -0.441191 |
| C  | -3.705481 | -2.263977 | 2.936151  |
| H  | -3.095569 | -0.300003 | 2.232909  |
| C  | -4.427050 | -3.438194 | 2.649942  |
| H  | -5.685716 | -4.472631 | 1.203226  |
| H  | -3.143218 | -2.172600 | 3.878406  |
| H  | -4.438852 | -4.269387 | 3.372388  |
| C  | -4.972300 | -0.486249 | -1.960729 |
| C  | -6.349514 | -0.670162 | -2.216566 |
| C  | -4.025499 | -0.808453 | -2.958399 |
| C  | -6.768629 | -1.193781 | -3.451150 |
| H  | -7.094734 | -0.395775 | -1.452763 |
| C  | -4.450446 | -1.334019 | -4.189978 |
| H  | -2.954773 | -0.622360 | -2.769983 |
| C  | -5.821315 | -1.530788 | -4.435378 |
| H  | -7.843034 | -1.333959 | -3.648086 |
| H  | -3.708875 | -1.580788 | -4.965860 |
| H  | -6.154646 | -1.937749 | -5.402888 |
| Au | -2.196476 | 1.015179  | -0.306257 |
| H  | 0.103936  | 3.624044  | -0.365760 |
| H  | 0.168355  | 2.572058  | -1.781185 |
| H  | 0.087816  | -0.681885 | 1.676986  |
| P  | 2.889563  | -1.762294 | -0.058822 |
| C  | 4.101647  | 3.181253  | -1.977703 |
| C  | 4.818442  | 3.511489  | -0.782381 |
| C  | 2.763137  | 2.785136  | -1.929243 |
| C  | 4.109244  | 3.390577  | 0.456985  |
| C  | 2.020564  | 2.679810  | -0.698539 |
| H  | 2.234019  | 2.587108  | -2.875864 |
| C  | 2.770271  | 2.994023  | 0.495752  |
| H  | 4.607318  | 3.614553  | 1.408939  |
| H  | 2.252493  | 2.957226  | 1.466143  |
| C  | 3.739179  | -2.119202 | 1.523808  |
| C  | 4.667299  | -3.173898 | 1.650347  |
| C  | 3.408362  | -1.322590 | 2.644896  |
| C  | 5.259563  | -3.430669 | 2.899885  |
| H  | 4.930828  | -3.792392 | 0.777938  |
| C  | 3.996431  | -1.594987 | 3.889106  |
| H  | 2.680641  | -0.499125 | 2.548999  |
| C  | 4.923931  | -2.646525 | 4.017546  |
| H  | 5.987337  | -4.251111 | 2.998325  |
| H  | 3.730593  | -0.977462 | 4.761227  |
| H  | 5.389854  | -2.853441 | 4.993697  |
| C  | 3.737255  | -2.719937 | -1.363061 |
| C  | 3.386657  | -4.065643 | -1.610097 |
| C  | 4.783710  | -2.112669 | -2.090900 |
| C  | 4.090596  | -4.799563 | -2.579700 |
| H  | 2.562689  | -4.534629 | -1.048804 |
| C  | 5.484197  | -2.854784 | -3.055308 |
| H  | 5.039116  | -1.056513 | -1.902773 |
| C  | 5.138510  | -4.196802 | -3.299170 |
| H  | 3.816730  | -5.847854 | -2.775930 |
| H  | 6.299282  | -2.382027 | -3.624919 |
| H  | 5.685466  | -4.775240 | -4.060030 |
| C  | 1.196141  | -2.451532 | 0.110076  |
| C  | 0.831078  | -3.244836 | 1.219459  |
| C  | 0.222405  | -2.087923 | -0.848871 |
| C  | -0.504853 | -3.655763 | 1.370487  |
| H  | 1.581950  | -3.520244 | 1.975915  |
| C  | -1.108337 | -2.500307 | -0.686014 |
| H  | 0.500243  | -1.455551 | -1.707590 |
| C  | -1.474333 | -3.280344 | 0.425289  |



---

|    |           |           |           |
|----|-----------|-----------|-----------|
| H  | -0.794082 | -4.262518 | 2.242441  |
| H  | -1.871628 | -2.197299 | -1.417812 |
| H  | -2.522557 | -3.584905 | 0.559000  |
| Au | 2.692863  | 0.487893  | -0.449773 |
| H  | 4.591320  | 3.236171  | -2.958237 |
| N  | 6.128887  | 3.916005  | -0.821450 |
| C  | 6.811727  | 4.068258  | -2.102166 |
| H  | 7.852243  | 4.395026  | -1.926051 |
| H  | 6.849603  | 3.109309  | -2.665222 |
| H  | 6.319664  | 4.829422  | -2.748228 |
| C  | 6.825927  | 4.270528  | 0.411214  |
| H  | 6.862324  | 3.415757  | 1.122148  |
| H  | 7.866630  | 4.555306  | 0.173803  |
| H  | 6.345691  | 5.131537  | 0.927744  |

**[(PPh<sub>3</sub>)Au(*para*-aniline-alkene)] anti-Markovnikov**  
-1846.53690951 A.U.

|    |           |           |           |
|----|-----------|-----------|-----------|
| P  | -2.645610 | 0.238531  | -0.006971 |
| H  | 2.062660  | 0.788508  | -1.328058 |
| C  | 1.751259  | 0.494183  | -0.301260 |
| C  | 2.564039  | 1.339985  | 0.710136  |
| C  | 1.908139  | -1.836156 | -1.311554 |
| C  | 1.861984  | -1.004861 | -0.163002 |
| C  | 1.878566  | -3.235357 | -1.209950 |
| C  | 1.819455  | -1.653690 | 1.100139  |
| C  | 1.819799  | -3.858053 | 0.051151  |
| H  | 1.905595  | -3.848122 | -2.125888 |
| C  | 1.796214  | -3.053272 | 1.206147  |
| H  | 1.767195  | -1.043494 | 2.015723  |
| H  | 1.801746  | -4.956533 | 0.133544  |
| H  | 1.753565  | -3.521538 | 2.203297  |
| C  | -3.389208 | 0.629012  | 1.629419  |
| C  | -4.345517 | -0.198770 | 2.255675  |
| C  | -2.979623 | 1.826365  | 2.258380  |
| C  | -4.895485 | 0.178140  | 3.493406  |
| H  | -4.656103 | -1.141396 | 1.778219  |
| C  | -3.537517 | 2.200806  | 3.491457  |
| H  | -2.211163 | 2.455626  | 1.778852  |
| C  | -4.496421 | 1.377505  | 4.109984  |
| H  | -5.638976 | -0.472618 | 3.980515  |
| H  | -3.213815 | 3.134944  | 3.976935  |
| H  | -4.927880 | 1.667682  | 5.081120  |
| C  | -2.895829 | -1.574761 | -0.245998 |
| C  | -4.120281 | -2.096254 | -0.721134 |
| C  | -1.829508 | -2.454874 | 0.051861  |
| C  | -4.279117 | -3.483625 | -0.879625 |
| H  | -4.947067 | -1.414875 | -0.979107 |
| C  | -1.994961 | -3.839848 | -0.111933 |
| H  | -0.855183 | -2.065266 | 0.392579  |
| C  | -3.218453 | -4.356397 | -0.574031 |
| H  | -5.235343 | -3.884037 | -1.252432 |
| H  | -1.146657 | -4.506030 | 0.110214  |
| H  | -3.344031 | -5.442731 | -0.708045 |
| C  | -3.778219 | 1.015663  | -1.230905 |
| C  | -5.070821 | 1.475008  | -0.900041 |
| C  | -3.310337 | 1.133140  | -2.559439 |
| C  | -5.890570 | 2.036903  | -1.895078 |
| H  | -5.435403 | 1.394984  | 0.136374  |
| C  | -4.136081 | 1.688553  | -3.549219 |
| H  | -2.291520 | 0.791963  | -2.808445 |
| C  | -5.427316 | 2.140964  | -3.218521 |
| H  | -6.898445 | 2.396012  | -1.632714 |
| H  | -3.766606 | 1.777065  | -4.583052 |
| H  | -6.072020 | 2.582721  | -3.994811 |
| Au | -0.352769 | 0.688819  | -0.188395 |
| H  | 2.268385  | 1.097151  | 1.752816  |
| H  | 2.298740  | 2.408225  | 0.562416  |
| H  | 1.944728  | -1.360675 | -2.305787 |
| C  | 6.155969  | -0.027951 | 1.048178  |
| C  | 6.871591  | 0.708715  | 0.061570  |
| C  | 4.790269  | 0.198292  | 1.269672  |
| C  | 6.134117  | 1.670564  | -0.687979 |
| C  | 4.059239  | 1.153900  | 0.534006  |
| H  | 4.275111  | -0.399713 | 2.038483  |

---

|   |          |           |           |
|---|----------|-----------|-----------|
| C | 4.769109 | 1.876725  | -0.447713 |
| H | 6.625951 | 2.270066  | -1.466613 |
| H | 4.233812 | 2.629833  | -1.051485 |
| H | 6.663715 | -0.790849 | 1.654409  |
| N | 8.231408 | 0.499790  | -0.160382 |
| C | 8.915234 | -0.574990 | 0.532916  |
| H | 9.982156 | -0.584068 | 0.239192  |
| H | 8.876371 | -0.444227 | 1.638645  |
| H | 8.487772 | -1.581489 | 0.302199  |
| C | 8.893745 | 1.180490  | -1.256177 |
| H | 8.839587 | 2.288050  | -1.148248 |
| H | 9.964917 | 0.902877  | -1.269977 |
| H | 8.460439 | 0.922467  | -2.253710 |

**[(PPh<sub>3</sub>)Au(*para*-aniline)--(PPh<sub>3</sub>)Au(alkene)]<sup>‡2</sup> TS Markovnikov**

-3018.34122123 A.U.

|    |           |           |           |
|----|-----------|-----------|-----------|
| P  | -3.873224 | -0.286558 | -0.080475 |
| H  | 0.704221  | -0.342593 | -0.783791 |
| C  | 0.553197  | 0.534289  | -0.110281 |
| C  | 0.702481  | 1.878639  | -0.682954 |
| C  | -0.459141 | 3.145758  | 1.166113  |
| C  | 0.121558  | 3.096746  | -0.130008 |
| C  | -0.996387 | 4.340381  | 1.657781  |
| C  | 0.158840  | 4.285764  | -0.906829 |
| C  | -0.947417 | 5.514960  | 0.877754  |
| H  | -1.465941 | 4.359459  | 2.653209  |
| C  | -0.367698 | 5.484613  | -0.403325 |
| H  | 0.599244  | 4.256833  | -1.915184 |
| H  | -1.371948 | 6.452837  | 1.268863  |
| H  | -0.341546 | 6.396474  | -1.019571 |
| C  | -4.663537 | 1.112356  | 0.793955  |
| C  | -5.832883 | 0.917492  | 1.563626  |
| C  | -4.109478 | 2.406316  | 0.661609  |
| C  | -6.446150 | 2.017641  | 2.186716  |
| H  | -6.259083 | -0.091253 | 1.683667  |
| C  | -4.729017 | 3.498205  | 1.288857  |
| H  | -3.187536 | 2.559585  | 0.076318  |
| C  | -5.897320 | 3.305670  | 2.049232  |
| H  | -7.357251 | 1.866453  | 2.785967  |
| H  | -4.292515 | 4.503740  | 1.185008  |
| H  | -6.381677 | 4.163136  | 2.541734  |
| C  | -4.252588 | -1.797571 | 0.881700  |
| C  | -4.866339 | -2.917220 | 0.283134  |
| C  | -3.832398 | -1.854009 | 2.230849  |
| C  | -5.048576 | -4.093867 | 1.032355  |
| H  | -5.204002 | -2.871165 | -0.764133 |
| C  | -4.028616 | -3.027457 | 2.974547  |
| H  | -3.354017 | -0.977313 | 2.697860  |
| C  | -4.629510 | -4.151404 | 2.373396  |
| H  | -5.529312 | -4.967721 | 0.566101  |
| H  | -3.711986 | -3.068263 | 4.028306  |
| H  | -4.778851 | -5.073004 | 2.956967  |
| C  | -4.677929 | -0.478977 | -1.709492 |
| C  | -6.053461 | -0.196432 | -1.862772 |
| C  | -3.929026 | -0.976224 | -2.799610 |
| C  | -6.674113 | -0.421409 | -3.102505 |
| H  | -6.638691 | 0.203851  | -1.020069 |
| C  | -4.559166 | -1.201025 | -4.034534 |
| H  | -2.853161 | -1.182667 | -2.677053 |
| C  | -5.930555 | -0.925492 | -4.185556 |
| H  | -7.745296 | -0.198284 | -3.223960 |
| H  | -3.976977 | -1.586110 | -4.886066 |
| H  | -6.421963 | -1.097812 | -5.155652 |
| Au | -1.589331 | 0.034020  | -0.200104 |
| H  | 0.599436  | 0.376289  | 0.985996  |
| H  | 0.823772  | 1.890102  | -1.778564 |
| H  | -0.514203 | 2.236047  | 1.783003  |
| P  | 2.772154  | -2.308303 | 0.075789  |
| C  | 3.498958  | 4.279693  | -1.440090 |
| C  | 3.380384  | 5.024016  | -0.212685 |
| C  | 3.272923  | 2.911626  | -1.467920 |
| C  | 3.068594  | 4.284547  | 0.985187  |
| C  | 2.866559  | 2.197447  | -0.298703 |
| H  | 3.374833  | 2.377720  | -2.426631 |

---

|    |           |           |           |
|----|-----------|-----------|-----------|
| C  | 2.839751  | 2.922061  | 0.934748  |
| H  | 3.001360  | 4.795719  | 1.953858  |
| H  | 2.572254  | 2.401775  | 1.869082  |
| C  | 3.907062  | -3.253058 | -0.989993 |
| C  | 3.536067  | -4.531511 | -1.470455 |
| C  | 5.195195  | -2.739271 | -1.261965 |
| C  | 4.454241  | -5.283850 | -2.221059 |
| H  | 2.534687  | -4.938557 | -1.260033 |
| C  | 6.105815  | -3.501165 | -2.010786 |
| H  | 5.489773  | -1.745892 | -0.887804 |
| C  | 5.735971  | -4.770883 | -2.491092 |
| H  | 4.166051  | -6.277939 | -2.596148 |
| H  | 7.108470  | -3.099827 | -2.223579 |
| H  | 6.451360  | -5.363761 | -3.081784 |
| C  | 1.062493  | -2.818090 | -0.356996 |
| C  | 0.112932  | -3.130575 | 0.640225  |
| C  | 0.672080  | -2.777756 | -1.717641 |
| C  | -1.214500 | -3.423333 | 0.274287  |
| H  | 0.410239  | -3.157574 | 1.700178  |
| C  | -0.654185 | -3.072112 | -2.072709 |
| H  | 1.410081  | -2.536041 | -2.500489 |
| C  | -1.596546 | -3.396512 | -1.078327 |
| H  | -1.956152 | -3.669772 | 1.049025  |
| H  | -0.950067 | -3.058139 | -3.133216 |
| H  | -2.636765 | -3.624453 | -1.354285 |
| C  | 3.060450  | -2.789227 | 1.812527  |
| C  | 3.565295  | -4.070606 | 2.126350  |
| C  | 2.733655  | -1.883107 | 2.847348  |
| C  | 3.732467  | -4.439465 | 3.471327  |
| H  | 3.836874  | -4.775390 | 1.324918  |
| C  | 2.899077  | -2.262267 | 4.189066  |
| H  | 2.357669  | -0.874568 | 2.605915  |
| C  | 3.398083  | -3.540401 | 4.500507  |
| H  | 4.131893  | -5.435583 | 3.716420  |
| H  | 2.649192  | -1.554730 | 4.994624  |
| H  | 3.536335  | -3.834234 | 5.552506  |
| Au | 2.892946  | 0.094328  | -0.169267 |
| H  | 3.779492  | 4.786176  | -2.372738 |
| N  | 3.560822  | 6.371712  | -0.181538 |
| C  | 3.895864  | 7.107949  | -1.404110 |
| H  | 3.995849  | 8.181631  | -1.168405 |
| H  | 4.858689  | 6.760834  | -1.835589 |
| H  | 3.101464  | 6.996806  | -2.173030 |
| C  | 3.430565  | 7.113421  | 1.076826  |
| H  | 4.194114  | 6.794225  | 1.817978  |
| H  | 3.575166  | 8.190187  | 0.881744  |
| H  | 2.421752  | 6.975775  | 1.519793  |
| H  | 4.465255  | 0.126539  | -0.185611 |

**[(PPh<sub>3</sub>)Au(*para*-aniline)--(PPh<sub>3</sub>)Au(alkene)]<sup>+2</sup> Intermediate Markovnikov**  
-3018.37162533 A.U.

|   |           |           |           |
|---|-----------|-----------|-----------|
| P | -3.962386 | -0.046264 | -0.075696 |
| H | 0.306142  | -0.145676 | -1.017099 |
| C | 0.561899  | 0.649262  | -0.270421 |
| C | 0.767516  | 2.100488  | -0.742314 |
| C | -0.535392 | 3.087572  | 1.238283  |
| C | -0.130867 | 3.158347  | -0.114971 |
| C | -1.340036 | 4.091314  | 1.802194  |
| C | -0.561558 | 4.255321  | -0.891588 |
| C | -1.752611 | 5.184084  | 1.020271  |
| H | -1.650199 | 4.018017  | 2.855836  |
| C | -1.367300 | 5.260880  | -0.330131 |
| H | -0.262870 | 4.323588  | -1.950728 |
| H | -2.378572 | 5.973692  | 1.463507  |
| H | -1.695101 | 6.108870  | -0.951364 |
| C | -4.784135 | 1.431153  | 0.612964  |
| C | -5.932290 | 1.299297  | 1.427074  |
| C | -4.303829 | 2.712326  | 0.259241  |
| C | -6.604131 | 2.450393  | 1.871130  |
| H | -6.298340 | 0.301735  | 1.717365  |
| C | -4.988080 | 3.854491  | 0.703226  |
| H | -3.392368 | 2.820564  | -0.352726 |
| C | -6.137154 | 3.725767  | 1.504765  |
| H | -7.498147 | 2.349442  | 2.505646  |

---

|    |           |           |           |
|----|-----------|-----------|-----------|
| H  | -4.614903 | 4.851026  | 0.423885  |
| H  | -6.669470 | 4.625040  | 1.851663  |
| C  | -4.335588 | -1.440730 | 1.051356  |
| C  | -5.000597 | -2.599483 | 0.600741  |
| C  | -3.871977 | -1.360598 | 2.384921  |
| C  | -5.189993 | -3.679859 | 1.481893  |
| H  | -5.371735 | -2.659730 | -0.434424 |
| C  | -4.075308 | -2.437722 | 3.260648  |
| H  | -3.354191 | -0.452477 | 2.735309  |
| C  | -4.727394 | -3.601849 | 2.807435  |
| H  | -5.710424 | -4.584345 | 1.130925  |
| H  | -3.724848 | -2.371519 | 4.302345  |
| H  | -4.882573 | -4.448098 | 3.494442  |
| C  | -4.751858 | -0.428788 | -1.678914 |
| C  | -6.141237 | -0.230342 | -1.844945 |
| C  | -3.983175 | -0.976196 | -2.729765 |
| C  | -6.754418 | -0.593939 | -3.054930 |
| H  | -6.742806 | 0.212621  | -1.035558 |
| C  | -4.605181 | -1.337560 | -3.935994 |
| H  | -2.897336 | -1.111143 | -2.599640 |
| C  | -5.989908 | -1.149485 | -4.097639 |
| H  | -7.836209 | -0.437375 | -3.185971 |
| H  | -4.006296 | -1.759782 | -4.757849 |
| H  | -6.475620 | -1.428818 | -5.045432 |
| Au | -1.689182 | 0.233437  | -0.221795 |
| H  | 0.408827  | 0.432287  | 0.809680  |
| H  | 0.582832  | 2.110106  | -1.835571 |
| H  | -0.231954 | 2.234904  | 1.866826  |
| P  | 2.563096  | -2.164070 | 0.101820  |
| C  | 4.315095  | 3.407497  | -1.573382 |
| C  | 4.822894  | 3.783824  | -0.277849 |
| C  | 3.101922  | 2.758970  | -1.701796 |
| C  | 4.015162  | 3.460090  | 0.871619  |
| C  | 2.290659  | 2.398435  | -0.559807 |
| H  | 2.728237  | 2.513906  | -2.709350 |
| C  | 2.801906  | 2.814178  | 0.730877  |
| H  | 4.346024  | 3.740088  | 1.879449  |
| H  | 2.187121  | 2.635747  | 1.626627  |
| C  | 3.656101  | -3.203838 | -0.912175 |
| C  | 3.248776  | -4.517045 | -1.252797 |
| C  | 4.941053  | -2.741096 | -1.274169 |
| C  | 4.130962  | -5.355127 | -1.953377 |
| H  | 2.250548  | -4.886097 | -0.970557 |
| C  | 5.813535  | -3.589490 | -1.973466 |
| H  | 5.254436  | -1.717958 | -1.013598 |
| C  | 5.410156  | -4.893823 | -2.313888 |
| H  | 3.815409  | -6.375958 | -2.218486 |
| H  | 6.813344  | -3.228034 | -2.258709 |
| H  | 6.096189  | -5.554359 | -2.866397 |
| C  | 0.838883  | -2.662873 | -0.244102 |
| C  | -0.088796 | -2.890360 | 0.797228  |
| C  | 0.419341  | -2.739196 | -1.595258 |
| C  | -1.420224 | -3.222738 | 0.485491  |
| H  | 0.227044  | -2.827713 | 1.849997  |
| C  | -0.910271 | -3.074520 | -1.893837 |
| H  | 1.136910  | -2.556976 | -2.412134 |
| C  | -1.829038 | -3.319238 | -0.855430 |
| H  | -2.143652 | -3.403328 | 1.294753  |
| H  | -1.228835 | -3.153552 | -2.944734 |
| H  | -2.872622 | -3.575975 | -1.090486 |
| C  | 2.909121  | -2.470040 | 1.864223  |
| C  | 3.608168  | -3.632116 | 2.258815  |
| C  | 2.444870  | -1.552546 | 2.836543  |
| C  | 3.827575  | -3.876646 | 3.624997  |
| H  | 3.983362  | -4.340988 | 1.504532  |
| C  | 2.665597  | -1.809445 | 4.198190  |
| H  | 1.914843  | -0.635728 | 2.529012  |
| C  | 3.356459  | -2.971303 | 4.592234  |
| H  | 4.374083  | -4.780926 | 3.933846  |
| H  | 2.305467  | -1.097086 | 4.956407  |
| H  | 3.534752  | -3.167523 | 5.660810  |
| Au | 2.720681  | 0.167229  | -0.301217 |
| H  | 4.883099  | 3.641626  | -2.482484 |
| N  | 6.012154  | 4.425557  | -0.145897 |

---

|   |          |          |           |
|---|----------|----------|-----------|
| C | 6.811119 | 4.770919 | -1.327694 |
| H | 7.752591 | 5.247210 | -1.003844 |
| H | 7.070716 | 3.865736 | -1.915685 |
| H | 6.272802 | 5.484708 | -1.987188 |
| C | 6.498529 | 4.835241 | 1.176843  |
| H | 6.622023 | 3.959820 | 1.848691  |
| H | 7.482780 | 5.322526 | 1.067696  |
| H | 5.806570 | 5.560410 | 1.655705  |
| H | 4.329050 | 0.099841 | -0.352950 |

**[(PPh<sub>3</sub>)Au(*para*-aniline-alkene)]<sup>+</sup> Markovnikov**

-1846.89912989 A.U.

|    |           |           |           |
|----|-----------|-----------|-----------|
| H  | 0.052107  | 2.420196  | -0.921267 |
| C  | 0.707665  | 1.772486  | -0.308629 |
| C  | 2.119133  | 1.533015  | -0.873251 |
| C  | 2.967442  | 3.751830  | 0.059261  |
| C  | 3.242288  | 2.439703  | -0.377236 |
| C  | 4.006998  | 4.599699  | 0.480929  |
| C  | 4.581844  | 1.993867  | -0.382478 |
| C  | 5.336987  | 4.145623  | 0.474135  |
| H  | 3.774864  | 5.622357  | 0.817902  |
| C  | 5.621748  | 2.838763  | 0.039187  |
| H  | 4.817722  | 0.970865  | -0.720773 |
| H  | 6.150898  | 4.808159  | 0.807462  |
| H  | 6.661295  | 2.474754  | 0.028614  |
| H  | 0.713754  | 2.138182  | 0.740375  |
| H  | 2.064532  | 1.638762  | -1.980535 |
| H  | 1.929194  | 4.120234  | 0.063139  |
| P  | -2.141044 | -0.018372 | 0.034892  |
| C  | 3.313028  | -2.124082 | -1.398719 |
| C  | 3.589350  | -2.549794 | -0.053788 |
| C  | 2.742461  | -0.887799 | -1.653544 |
| C  | 3.264065  | -1.641374 | 1.011604  |
| C  | 2.385158  | 0.025993  | -0.599650 |
| H  | 2.564378  | -0.579491 | -2.696304 |
| C  | 2.701110  | -0.404341 | 0.743887  |
| H  | 3.472819  | -1.907543 | 2.055299  |
| H  | 2.521676  | 0.298231  | 1.573348  |
| C  | -3.242850 | -1.163478 | -0.866918 |
| C  | -4.543585 | -0.733511 | -1.220893 |
| C  | -2.837654 | -2.489778 | -1.130794 |
| C  | -5.430057 | -1.634398 | -1.833049 |
| H  | -4.863480 | 0.300440  | -1.018658 |
| C  | -3.732909 | -3.381602 | -1.742516 |
| H  | -1.817635 | -2.810284 | -0.865118 |
| C  | -5.027162 | -2.956578 | -2.093784 |
| H  | -6.441476 | -1.298527 | -2.109535 |
| H  | -3.414263 | -4.414464 | -1.951954 |
| H  | -5.724319 | -3.657889 | -2.578260 |
| C  | -2.688773 | 1.668265  | -0.397567 |
| C  | -3.220024 | 2.552926  | 0.563562  |
| C  | -2.541045 | 2.083106  | -1.741995 |
| C  | -3.605573 | 3.848719  | 0.174995  |
| H  | -3.339145 | 2.233471  | 1.610220  |
| C  | -2.932864 | 3.375049  | -2.120373 |
| H  | -2.117227 | 1.392765  | -2.490021 |
| C  | -3.463358 | 4.259834  | -1.161118 |
| H  | -4.023287 | 4.538669  | 0.924450  |
| H  | -2.820813 | 3.696210  | -3.167475 |
| H  | -3.766538 | 5.275475  | -1.459279 |
| C  | -2.433445 | -0.253911 | 1.822729  |
| C  | -3.515189 | -1.031758 | 2.287213  |
| C  | -1.563374 | 0.378181  | 2.741973  |
| C  | -3.726273 | -1.168547 | 3.670231  |
| H  | -4.189574 | -1.529129 | 1.572953  |
| C  | -1.787251 | 0.240409  | 4.120017  |
| H  | -0.715061 | 0.978612  | 2.375008  |
| C  | -2.867529 | -0.533746 | 4.584633  |
| H  | -4.569408 | -1.776190 | 4.033593  |
| H  | -1.113381 | 0.736173  | 4.835830  |
| H  | -3.038280 | -0.644564 | 5.666762  |
| Au | 0.141383  | -0.307373 | -0.350023 |
| H  | 3.549745  | -2.776634 | -2.248433 |
| N  | 4.147306  | -3.768512 | 0.201314  |

---

|   |           |           |           |
|---|-----------|-----------|-----------|
| C | 4.511439  | -4.663366 | -0.898125 |
| H | 4.942828  | -5.592054 | -0.484901 |
| H | 3.624685  | -4.940472 | -1.508031 |
| H | 5.269380  | -4.201943 | -1.567848 |
| C | 4.437078  | -4.178444 | 1.575964  |
| H | 3.518463  | -4.179218 | 2.200937  |
| H | 4.844901  | -5.204583 | 1.572279  |
| H | 5.188101  | -3.512022 | 2.053789  |
| H | -0.005491 | -1.946669 | -0.419674 |

**[(PPh<sub>3</sub>)Au(*para*-aniline-alkene) + AnilineH]<sup>+</sup> Intermediate Markovnikov**

-2212.94218385 A.U.

|    |           |           |           |
|----|-----------|-----------|-----------|
| H  | 2.725882  | -1.223383 | -1.612307 |
| C  | 2.062252  | -0.346535 | -1.471517 |
| C  | 2.682369  | 0.604113  | -0.412113 |
| C  | 4.219018  | 2.267887  | -1.624697 |
| C  | 4.057572  | 1.078835  | -0.884064 |
| C  | 5.485591  | 2.646450  | -2.102288 |
| C  | 5.192685  | 0.279049  | -0.629413 |
| C  | 6.610275  | 1.842800  | -1.843303 |
| H  | 5.596497  | 3.580065  | -2.676436 |
| C  | 6.460002  | 0.656050  | -1.103283 |
| H  | 5.074807  | -0.653111 | -0.051550 |
| H  | 7.602988  | 2.142949  | -2.213809 |
| H  | 7.336822  | 0.023306  | -0.891333 |
| H  | 2.023508  | 0.161558  | -2.463074 |
| H  | 2.877160  | -0.010878 | 0.496027  |
| H  | 3.343828  | 2.908941  | -1.817405 |
| P  | -2.231301 | -0.680029 | -0.418781 |
| C  | 0.991104  | 3.283369  | 1.787430  |
| C  | -0.064880 | 3.779898  | 0.964213  |
| C  | 1.862374  | 2.291627  | 1.317442  |
| C  | -0.143161 | 3.263396  | -0.363613 |
| C  | 1.755475  | 1.737894  | 0.023937  |
| H  | 2.673256  | 1.944498  | 1.981943  |
| C  | 0.751388  | 2.280651  | -0.808976 |
| H  | -0.916666 | 3.615103  | -1.059748 |
| H  | 0.650206  | 1.933113  | -1.848645 |
| C  | -2.350851 | -0.311612 | 1.378507  |
| C  | -2.908505 | -1.205847 | 2.316814  |
| C  | -1.770184 | 0.901680  | 1.817491  |
| C  | -2.881162 | -0.883657 | 3.687874  |
| H  | -3.376764 | -2.144052 | 1.977619  |
| C  | -1.764623 | 1.223587  | 3.182480  |
| H  | -1.316831 | 1.592960  | 1.088787  |
| C  | -2.315148 | 0.329307  | 4.121839  |
| H  | -3.320594 | -1.579881 | 4.419446  |
| H  | -1.310688 | 2.173532  | 3.504626  |
| H  | -2.307402 | 0.579418  | 5.194260  |
| C  | -3.331948 | -2.110224 | -0.717260 |
| C  | -4.735372 | -2.006393 | -0.589318 |
| C  | -2.744582 | -3.348611 | -1.056838 |
| C  | -5.539381 | -3.139511 | -0.789505 |
| H  | -5.200153 | -1.039196 | -0.340780 |
| C  | -3.555034 | -4.480338 | -1.253330 |
| H  | -1.650769 | -3.412814 | -1.183737 |
| C  | -4.950502 | -4.375826 | -1.117727 |
| H  | -6.633292 | -3.057635 | -0.694018 |
| H  | -3.096602 | -5.444067 | -1.524553 |
| H  | -5.586071 | -5.260732 | -1.277716 |
| C  | -2.978973 | 0.805683  | -1.206328 |
| C  | -3.977030 | 1.566250  | -0.557978 |
| C  | -2.497103 | 1.215472  | -2.469370 |
| C  | -4.487093 | 2.722322  | -1.171737 |
| H  | -4.340116 | 1.270854  | 0.439083  |
| C  | -3.007273 | 2.374896  | -3.076317 |
| H  | -1.709544 | 0.632421  | -2.974722 |
| C  | -4.000700 | 3.130139  | -2.427700 |
| H  | -5.266384 | 3.311235  | -0.663347 |
| H  | -2.622858 | 2.691956  | -4.058087 |
| H  | -4.396841 | 4.041503  | -2.902036 |
| Au | 0.063877  | -0.785611 | -1.013848 |
| H  | 1.132559  | 3.667322  | 2.806819  |
| N  | -0.985906 | 4.699351  | 1.437340  |

---

|   |           |           |           |
|---|-----------|-----------|-----------|
| C | -0.802491 | 5.304440  | 2.745699  |
| H | -1.606322 | 6.040985  | 2.928305  |
| H | -0.848021 | 4.551524  | 3.567393  |
| H | 0.172731  | 5.836612  | 2.833643  |
| C | -2.054046 | 5.162486  | 0.565679  |
| H | -2.661145 | 4.313054  | 0.179173  |
| H | -2.729778 | 5.829195  | 1.132711  |
| H | -1.672475 | 5.731098  | -0.314874 |
| C | 3.617734  | -2.285879 | 2.280615  |
| C | 2.582149  | -2.529581 | 1.366057  |
| C | 4.918473  | -2.718540 | 1.965582  |
| C | 2.823860  | -3.194358 | 0.151080  |
| C | 5.175327  | -3.380903 | 0.754080  |
| H | 5.736421  | -2.525475 | 2.675948  |
| C | 4.126444  | -3.617621 | -0.152249 |
| H | 2.006606  | -3.347884 | -0.570402 |
| H | 4.322290  | -4.124053 | -1.109305 |
| H | 3.440600  | -1.760134 | 3.228243  |
| N | 1.188149  | -2.085165 | 1.630815  |
| C | 1.028811  | -1.042434 | 2.689555  |
| H | -0.026850 | -0.723031 | 2.694462  |
| H | 1.295296  | -1.464718 | 3.675534  |
| H | 1.661035  | -0.172001 | 2.440378  |
| C | 0.255175  | -3.238949 | 1.865036  |
| H | 0.560474  | -3.762797 | 2.790094  |
| H | -0.772617 | -2.840327 | 1.962355  |
| H | 0.309304  | -3.929437 | 1.005400  |
| H | 0.848235  | -1.614201 | 0.698240  |
| H | 6.197606  | -3.707782 | 0.511125  |

**[(PPh<sub>3</sub>)Au(*para*-aniline-alkene)--H--Aniline]<sup>+</sup> TS Markovnikov**

|   |           |           |           |
|---|-----------|-----------|-----------|
| H | 2.895516  | -1.232650 | -1.348718 |
| C | 2.096514  | -0.497317 | -1.108757 |
| C | 2.692168  | 0.713152  | -0.329038 |
| C | 3.714042  | 2.420918  | -1.976910 |
| C | 3.857727  | 1.305476  | -1.127161 |
| C | 4.803287  | 2.887996  | -2.734247 |
| C | 5.119424  | 0.674721  | -1.044650 |
| C | 6.052198  | 2.248499  | -2.651473 |
| H | 4.675614  | 3.765202  | -3.388179 |
| C | 6.207573  | 1.139772  | -1.800018 |
| H | 5.249772  | -0.191652 | -0.375903 |
| H | 6.904769  | 2.618384  | -3.242239 |
| H | 7.184862  | 0.638066  | -1.717567 |
| H | 1.778300  | -0.176808 | -2.131904 |
| H | 3.149893  | 0.300175  | 0.593709  |
| H | 2.748381  | 2.946059  | -2.035448 |
| P | -2.337814 | -0.732786 | -0.352757 |
| C | 0.695199  | 3.108396  | 1.928836  |
| C | -0.366176 | 3.565601  | 1.088874  |
| C | 1.657157  | 2.209581  | 1.450094  |
| C | -0.380011 | 3.078888  | -0.253463 |
| C | 1.638932  | 1.712401  | 0.130355  |
| H | 2.466743  | 1.893563  | 2.130298  |
| C | 0.599444  | 2.185340  | -0.706321 |
| H | -1.169447 | 3.384090  | -0.952558 |
| H | 0.549261  | 1.865029  | -1.759844 |
| C | -2.506943 | -0.544017 | 1.465533  |
| C | -3.354621 | -1.357170 | 2.245026  |
| C | -1.716527 | 0.456079  | 2.079644  |
| C | -3.411892 | -1.163546 | 3.638030  |
| H | -3.967301 | -2.139470 | 1.769833  |
| C | -1.784941 | 0.644299  | 3.466992  |
| H | -1.043104 | 1.084700  | 1.475063  |
| C | -2.631836 | -0.165528 | 4.248788  |
| H | -4.073304 | -1.797993 | 4.248393  |
| H | -1.164609 | 1.426273  | 3.933176  |
| H | -2.682219 | -0.020218 | 5.339279  |
| C | -3.353571 | -2.172192 | -0.838704 |
| C | -4.753321 | -2.058271 | -0.991255 |
| C | -2.723370 | -3.424175 | -1.012263 |
| C | -5.514110 | -3.196644 | -1.304487 |
| H | -5.247514 | -1.080971 | -0.873929 |
| C | -3.491278 | -4.558473 | -1.322162 |

|    |           |           |           |
|----|-----------|-----------|-----------|
| H  | -1.627683 | -3.501584 | -0.915771 |
| C  | -4.885802 | -4.445179 | -1.466842 |
| H  | -6.604587 | -3.106996 | -1.427377 |
| H  | -2.998201 | -5.533047 | -1.461080 |
| H  | -5.486372 | -5.333816 | -1.716084 |
| C  | -3.118949 | 0.763756  | -1.067429 |
| C  | -4.143270 | 1.448796  | -0.379291 |
| C  | -2.684866 | 1.223137  | -2.329843 |
| C  | -4.738044 | 2.580265  | -0.963767 |
| H  | -4.465751 | 1.107695  | 0.617348  |
| C  | -3.277036 | 2.359508  | -2.903574 |
| H  | -1.873362 | 0.694877  | -2.856728 |
| C  | -4.305391 | 3.036744  | -2.222325 |
| H  | -5.540135 | 3.112397  | -0.429107 |
| H  | -2.933564 | 2.719317  | -3.885772 |
| H  | -4.769109 | 3.928044  | -2.672891 |
| Au | -0.079962 | -0.829123 | -0.805489 |
| H  | 0.776925  | 3.459035  | 2.966163  |
| N  | -1.338401 | 4.429776  | 1.554417  |
| C  | -1.271774 | 4.931023  | 2.917652  |
| H  | -2.139501 | 5.587742  | 3.111643  |
| H  | -1.306980 | 4.103618  | 3.662685  |
| H  | -0.346992 | 5.523180  | 3.110664  |
| C  | -2.337840 | 4.955271  | 0.636985  |
| H  | -2.952964 | 4.144458  | 0.188585  |
| H  | -3.019699 | 5.632141  | 1.183730  |
| H  | -1.879980 | 5.534024  | -0.198760 |
| C  | 4.205925  | -1.539004 | 2.269715  |
| C  | 3.520826  | -2.215685 | 1.238648  |
| C  | 5.611365  | -1.522300 | 2.290286  |
| C  | 4.266992  | -2.880620 | 0.239510  |
| C  | 6.350725  | -2.181368 | 1.295673  |
| H  | 6.129118  | -0.986298 | 3.100515  |
| C  | 5.669597  | -2.862873 | 0.272143  |
| H  | 3.761900  | -3.410701 | -0.580536 |
| H  | 6.232494  | -3.382710 | -0.518074 |
| H  | 3.660314  | -1.013878 | 3.063948  |
| N  | 2.067358  | -2.181700 | 1.135645  |
| C  | 1.357461  | -1.490351 | 2.236461  |
| H  | 0.274248  | -1.491972 | 2.009990  |
| H  | 1.523494  | -1.995949 | 3.210937  |
| H  | 1.673752  | -0.433299 | 2.293082  |
| C  | 1.449390  | -3.507548 | 0.874715  |
| H  | 1.627766  | -4.199179 | 1.724262  |
| H  | 0.359756  | -3.362665 | 0.734762  |
| H  | 1.855081  | -3.951415 | -0.051394 |
| H  | 1.758962  | -1.408169 | -0.030464 |
| H  | 7.450703  | -2.164754 | 1.316967  |

**[(PPh<sub>3</sub>)Au(*para*-aniline-alkeneH) + Aniline]<sup>+</sup> Intermediate Markovnikov  
-2212.97229653 A.U.**

|   |           |           |           |
|---|-----------|-----------|-----------|
| H | 3.256016  | -0.959021 | -2.573206 |
| C | 2.516691  | -0.301337 | -2.073704 |
| C | 3.082595  | 0.221913  | -0.740979 |
| C | 4.360190  | 2.298301  | -1.539463 |
| C | 4.377465  | 1.009419  | -0.964492 |
| C | 5.555504  | 2.998329  | -1.769848 |
| C | 5.622136  | 0.442025  | -0.623032 |
| C | 6.791950  | 2.421432  | -1.425489 |
| H | 5.523040  | 4.004839  | -2.216606 |
| C | 6.821800  | 1.140082  | -0.849817 |
| H | 5.645996  | -0.564108 | -0.174276 |
| H | 7.728987  | 2.972258  | -1.602657 |
| H | 7.784430  | 0.680844  | -0.573726 |
| H | 2.274436  | 0.523132  | -2.775016 |
| H | 3.355223  | -0.663692 | -0.133638 |
| H | 3.396994  | 2.766753  | -1.798748 |
| P | -2.123043 | -0.074028 | -0.605267 |
| C | 1.269827  | 1.772762  | 2.284571  |
| C | 0.298898  | 2.632605  | 1.689133  |
| C | 2.133554  | 1.007896  | 1.487334  |
| C | 0.253456  | 2.661626  | 0.266799  |
| C | 2.072925  | 1.018987  | 0.075821  |
| H | 2.907908  | 0.391679  | 1.974085  |



---

|    |           |           |           |
|----|-----------|-----------|-----------|
| C  | 1.108228  | 1.867475  | -0.507231 |
| H  | -0.453680 | 3.320476  | -0.250169 |
| H  | 1.013889  | 1.923535  | -1.601954 |
| C  | -3.104046 | 0.993116  | 0.516995  |
| C  | -4.320808 | 1.552707  | 0.058772  |
| C  | -2.696977 | 1.191231  | 1.853120  |
| C  | -5.103798 | 2.326876  | 0.927940  |
| H  | -4.663281 | 1.370336  | -0.972496 |
| C  | -3.498824 | 1.948479  | 2.723166  |
| H  | -1.745398 | 0.762377  | 2.205944  |
| C  | -4.694393 | 2.523237  | 2.261342  |
| H  | -6.046769 | 2.766903  | 0.568349  |
| H  | -3.178884 | 2.097932  | 3.765346  |
| H  | -5.318106 | 3.121175  | 2.944020  |
| C  | -3.333986 | -1.297984 | -1.255327 |
| C  | -3.968034 | -1.108194 | -2.502247 |
| C  | -3.676455 | -2.410184 | -0.453745 |
| C  | -4.938433 | -2.026940 | -2.939173 |
| H  | -3.700960 | -0.249395 | -3.137579 |
| C  | -4.648745 | -3.320773 | -0.895043 |
| H  | -3.177087 | -2.560670 | 0.518038  |
| C  | -5.280066 | -3.130541 | -2.138662 |
| H  | -5.428420 | -1.877994 | -3.913918 |
| H  | -4.913043 | -4.186280 | -0.267772 |
| H  | -6.039035 | -3.848775 | -2.485788 |
| C  | -1.608359 | 0.896598  | -2.067227 |
| C  | -1.916593 | 2.262650  | -2.225719 |
| C  | -0.839013 | 0.227502  | -3.044650 |
| C  | -1.429333 | 2.960883  | -3.343848 |
| H  | -2.519327 | 2.787601  | -1.469785 |
| C  | -0.361087 | 0.928533  | -4.161676 |
| H  | -0.604938 | -0.842442 | -2.925481 |
| C  | -0.646827 | 2.299034  | -4.306889 |
| H  | -1.661253 | 4.030736  | -3.460834 |
| H  | 0.245755  | 0.405484  | -4.916542 |
| H  | -0.261432 | 2.852217  | -5.177317 |
| Au | -0.453195 | -1.158654 | 0.520209  |
| H  | 1.380638  | 1.727076  | 3.376859  |
| N  | -0.564882 | 3.404165  | 2.450180  |
| C  | -0.473567 | 3.377318  | 3.898999  |
| H  | -1.268417 | 4.013529  | 4.330556  |
| H  | -0.615502 | 2.345944  | 4.297880  |
| H  | 0.506062  | 3.752153  | 4.278029  |
| C  | -1.434184 | 4.370033  | 1.796588  |
| H  | -2.122556 | 3.875749  | 1.074445  |
| H  | -2.064719 | 4.867860  | 2.555516  |
| H  | -0.860998 | 5.154666  | 1.250347  |
| C  | 3.289915  | -2.505341 | 1.914499  |
| C  | 2.100333  | -2.722828 | 1.195884  |
| C  | 4.532233  | -2.755295 | 1.301038  |
| C  | 2.166551  | -3.186766 | -0.135097 |
| C  | 4.598133  | -3.225149 | -0.019187 |
| H  | 5.456336  | -2.573742 | 1.870826  |
| C  | 3.406890  | -3.438345 | -0.736278 |
| H  | 1.240261  | -3.335350 | -0.712710 |
| H  | 3.441521  | -3.791260 | -1.778015 |
| H  | 3.276857  | -2.140350 | 2.949223  |
| N  | 0.769128  | -2.503669 | 1.793516  |
| C  | 0.804167  | -1.889873 | 3.152066  |
| H  | -0.236583 | -1.738999 | 3.494289  |
| H  | 1.322642  | -2.555801 | 3.875618  |
| H  | 1.304164  | -0.906980 | 3.105033  |
| C  | 0.032413  | -3.811068 | 1.884692  |
| H  | 0.596582  | -4.511874 | 2.537590  |
| H  | -0.972586 | -3.630594 | 2.311527  |
| H  | -0.080973 | -4.260664 | 0.882898  |
| H  | 1.587937  | -0.884890 | -1.897399 |
| H  | 5.572624  | -3.414360 | -0.493743 |

**[(PPh<sub>3</sub>)Au(*para*-aniline-alkeneH)]<sup>+</sup> Markovnikov**

-1846.96572674 A.U.

|   |           |           |          |
|---|-----------|-----------|----------|
| H | -2.579978 | -3.504234 | 1.496102 |
| C | -2.324132 | -2.428079 | 1.554698 |
| C | -2.751094 | -1.719036 | 0.256191 |

---

|    |           |           |           |
|----|-----------|-----------|-----------|
| C  | -5.189199 | -1.161351 | 0.805369  |
| C  | -4.255765 | -1.860794 | 0.010365  |
| C  | -6.568657 | -1.309915 | 0.588923  |
| C  | -4.735212 | -2.707386 | -1.009735 |
| C  | -7.036515 | -2.159650 | -0.430283 |
| H  | -7.284377 | -0.758415 | 1.218852  |
| C  | -6.116006 | -2.858184 | -1.229620 |
| H  | -4.017504 | -3.260316 | -1.638823 |
| H  | -8.118166 | -2.275320 | -0.601065 |
| H  | -6.473028 | -3.525204 | -2.030027 |
| H  | -2.853917 | -2.018931 | 2.439120  |
| H  | -2.237226 | -2.225716 | -0.589963 |
| H  | -4.835588 | -0.486318 | 1.602290  |
| P  | 2.187298  | -0.205875 | -0.052994 |
| C  | -2.667935 | 1.839415  | -1.167456 |
| C  | -2.673994 | 2.665976  | 0.007754  |
| C  | -2.527182 | 0.459789  | -1.073970 |
| C  | -2.504163 | 2.010494  | 1.271238  |
| C  | -2.362591 | -0.226551 | 0.187240  |
| H  | -2.592458 | -0.148582 | -1.990667 |
| C  | -2.365338 | 0.624681  | 1.353401  |
| H  | -2.484915 | 2.590380  | 2.202577  |
| H  | -2.288195 | 0.162391  | 2.349512  |
| C  | 2.817916  | 0.188868  | -1.725275 |
| C  | 3.972473  | -0.447117 | -2.231705 |
| C  | 2.162647  | 1.182034  | -2.486805 |
| C  | 4.469054  | -0.082005 | -3.494734 |
| H  | 4.479580  | -1.227773 | -1.642872 |
| C  | 2.667770  | 1.542509  | -3.745872 |
| H  | 1.253714  | 1.666945  | -2.093072 |
| C  | 3.820285  | 0.911353  | -4.249823 |
| H  | 5.367063  | -0.580219 | -3.891705 |
| H  | 2.156375  | 2.315037  | -4.340832 |
| H  | 4.211253  | 1.191167  | -5.240443 |
| C  | 2.810037  | -1.877921 | 0.358892  |
| C  | 3.993395  | -2.053146 | 1.108232  |
| C  | 2.105469  | -3.002006 | -0.128507 |
| C  | 4.468225  | -3.351668 | 1.362758  |
| H  | 4.540971  | -1.179522 | 1.495427  |
| C  | 2.589447  | -4.294193 | 0.126904  |
| H  | 1.175685  | -2.863069 | -0.705224 |
| C  | 3.770204  | -4.469522 | 0.872790  |
| H  | 5.389334  | -3.488974 | 1.950099  |
| H  | 2.039807  | -5.169351 | -0.252809 |
| H  | 4.145017  | -5.484477 | 1.077275  |
| C  | 3.009775  | 0.949694  | 1.105716  |
| C  | 4.149358  | 1.689292  | 0.724155  |
| C  | 2.503079  | 1.053946  | 2.421199  |
| C  | 4.781120  | 2.524616  | 1.662373  |
| H  | 4.542469  | 1.615918  | -0.301923 |
| C  | 3.143520  | 1.885718  | 3.352229  |
| H  | 1.606356  | 0.481954  | 2.712956  |
| C  | 4.282483  | 2.621411  | 2.973254  |
| H  | 5.669636  | 3.102752  | 1.364659  |
| H  | 2.750686  | 1.963764  | 4.377876  |
| H  | 4.781368  | 3.276818  | 3.704053  |
| Au | -0.108864 | -0.110747 | 0.083125  |
| H  | -2.788491 | 2.284601  | -2.163214 |
| N  | -2.832129 | 4.021716  | -0.077798 |
| C  | -3.047118 | 4.659843  | -1.375224 |
| H  | -3.145481 | 5.750764  | -1.233813 |
| H  | -2.192828 | 4.482899  | -2.064637 |
| H  | -3.975084 | 4.293125  | -1.866584 |
| C  | -2.858341 | 4.838436  | 1.134177  |
| H  | -1.913432 | 4.740106  | 1.711812  |
| H  | -2.975416 | 5.901058  | 0.856700  |
| H  | -3.705936 | 4.562966  | 1.799898  |
| H  | -1.229672 | -2.338443 | 1.727993  |

**[(PPh<sub>3</sub>)Au(*para*-aniline-alkeneH)]<sup>+</sup> Anti-Markovnikov**

-1846.98198153 A.U.

|   |          |          |           |
|---|----------|----------|-----------|
| H | 2.607137 | 4.011588 | -1.677702 |
| C | 0.862642 | 4.305208 | -0.429116 |
| C | 1.717308 | 3.422411 | -1.360573 |

---

|    |           |           |           |
|----|-----------|-----------|-----------|
| C  | -0.701811 | 3.582555  | 1.452805  |
| C  | -0.421946 | 3.670215  | 0.071127  |
| C  | -1.910290 | 3.029497  | 1.913123  |
| C  | -1.389368 | 3.173548  | -0.838652 |
| C  | -2.860068 | 2.543678  | 0.997901  |
| H  | -2.113253 | 2.982776  | 2.994728  |
| C  | -2.598122 | 2.620203  | -0.380367 |
| H  | -1.204751 | 3.243555  | -1.923159 |
| H  | -3.804442 | 2.106107  | 1.355464  |
| H  | -3.336290 | 2.241212  | -1.103310 |
| H  | 0.611779  | 5.232710  | -0.989009 |
| H  | 1.158641  | 3.205529  | -2.296373 |
| H  | 0.032825  | 3.969445  | 2.178327  |
| P  | -1.052319 | -0.991439 | -0.034651 |
| C  | 3.630158  | 0.095829  | -1.246575 |
| C  | 4.003975  | -0.023594 | 0.132050  |
| C  | 2.772398  | 1.109016  | -1.673621 |
| C  | 3.479535  | 0.954161  | 1.040326  |
| C  | 2.226780  | 2.101259  | -0.778530 |
| H  | 2.537682  | 1.188739  | -2.747722 |
| C  | 2.632677  | 1.972810  | 0.598900  |
| H  | 3.726294  | 0.912669  | 2.108687  |
| H  | 2.280213  | 2.717562  | 1.328596  |
| C  | -0.414549 | -2.554524 | -0.754957 |
| C  | -1.285354 | -3.500323 | -1.338292 |
| C  | 0.969195  | -2.828189 | -0.665589 |
| C  | -0.771568 | -4.716300 | -1.822366 |
| H  | -2.362455 | -3.284563 | -1.421230 |
| C  | 1.471646  | -4.047897 | -1.144065 |
| H  | 1.651532  | -2.077916 | -0.230366 |
| C  | 0.603359  | -4.992394 | -1.723185 |
| H  | -1.451126 | -5.451110 | -2.281268 |
| H  | 2.549432  | -4.263066 | -1.071564 |
| H  | 1.001766  | -5.945440 | -2.104506 |
| C  | -2.663277 | -0.670976 | -0.840221 |
| C  | -3.869230 | -0.644630 | -0.111835 |
| C  | -2.659556 | -0.367237 | -2.220457 |
| C  | -5.068103 | -0.307256 | -0.765406 |
| H  | -3.871935 | -0.873271 | 0.965103  |
| C  | -3.860831 | -0.042571 | -2.867673 |
| H  | -1.711873 | -0.375099 | -2.783882 |
| C  | -5.065579 | -0.005328 | -2.138453 |
| H  | -6.009995 | -0.280301 | -0.195839 |
| H  | -3.858030 | 0.191996  | -3.943405 |
| H  | -6.006466 | 0.260454  | -2.644842 |
| C  | -1.397938 | -1.346771 | 1.727154  |
| C  | -1.867115 | -2.618601 | 2.125694  |
| C  | -1.233818 | -0.321002 | 2.682793  |
| C  | -2.178602 | -2.852972 | 3.474955  |
| H  | -1.982291 | -3.427000 | 1.386255  |
| C  | -1.551330 | -0.563102 | 4.029466  |
| H  | -0.863380 | 0.666710  | 2.365576  |
| C  | -2.024031 | -1.826943 | 4.425889  |
| H  | -2.541619 | -3.844770 | 3.786261  |
| H  | -1.424292 | 0.238994  | 4.773225  |
| H  | -2.268346 | -2.016690 | 5.482757  |
| Au | 0.457340  | 0.707254  | -0.345033 |
| H  | 4.000820  | -0.618709 | -1.992096 |
| N  | 4.811179  | -1.042927 | 0.565684  |
| C  | 5.333665  | -2.019752 | -0.385207 |
| H  | 5.922950  | -2.780569 | 0.156994  |
| H  | 4.512260  | -2.544459 | -0.921989 |
| H  | 5.997097  | -1.549712 | -1.144938 |
| C  | 5.213373  | -1.118839 | 1.968153  |
| H  | 4.333685  | -1.217769 | 2.641462  |
| H  | 5.853376  | -2.006608 | 2.117583  |
| H  | 5.794194  | -0.223264 | 2.281563  |
| H  | 1.470210  | 4.642082  | 0.437043  |

**[(PPh<sub>3</sub>)Au(alkene)-(aniline)]<sup>+</sup> Adduct**

-1846.50270633 A.U.

|   |           |           |           |
|---|-----------|-----------|-----------|
| P | 1.144108  | 0.987342  | 0.063582  |
| H | -0.894629 | -3.268427 | -1.261654 |
| C | 0.966896  | -2.227780 | -1.768937 |

|    |           |           |           |
|----|-----------|-----------|-----------|
| C  | -0.400262 | -2.502186 | -1.882123 |
| C  | 1.446458  | -3.593031 | 0.317712  |
| C  | 1.881151  | -2.752568 | -0.742188 |
| C  | 2.344090  | -4.039089 | 1.298900  |
| C  | 3.251317  | -2.383758 | -0.775786 |
| C  | 3.697640  | -3.651012 | 1.258694  |
| H  | 1.980469  | -4.687598 | 2.112086  |
| C  | 4.143254  | -2.819429 | 0.214501  |
| H  | 3.609301  | -1.724755 | -1.582746 |
| H  | 4.397990  | -3.992168 | 2.037071  |
| H  | 5.196619  | -2.499654 | 0.172007  |
| C  | 1.737970  | 0.756093  | 1.788400  |
| C  | 1.996996  | 1.837025  | 2.658339  |
| C  | 1.975788  | -0.565992 | 2.222053  |
| C  | 2.495760  | 1.590906  | 3.949633  |
| H  | 1.807223  | 2.870485  | 2.327812  |
| C  | 2.487105  | -0.804106 | 3.507079  |
| H  | 1.764602  | -1.411749 | 1.551227  |
| C  | 2.745734  | 0.272996  | 4.374284  |
| H  | 2.691507  | 2.436455  | 4.628232  |
| H  | 2.677386  | -1.840992 | 3.825613  |
| H  | 3.138301  | 0.085836  | 5.386537  |
| C  | 0.544985  | 2.726642  | 0.015028  |
| C  | 1.362859  | 3.806016  | -0.382798 |
| C  | -0.784310 | 2.966964  | 0.431193  |
| C  | 0.851978  | 5.116087  | -0.364212 |
| H  | 2.398786  | 3.620318  | -0.708504 |
| C  | -1.284129 | 4.278610  | 0.455939  |
| H  | -1.426176 | 2.117807  | 0.719836  |
| C  | -0.468715 | 5.354123  | 0.056683  |
| H  | 1.491381  | 5.955929  | -0.679878 |
| H  | -2.321629 | 4.458232  | 0.779206  |
| H  | -0.865927 | 6.381658  | 0.068627  |
| C  | 2.692838  | 0.996073  | -0.933989 |
| C  | 3.977059  | 0.911634  | -0.356631 |
| C  | 2.562199  | 0.985525  | -2.342087 |
| C  | 5.113914  | 0.807944  | -1.178787 |
| H  | 4.087998  | 0.907509  | 0.738500  |
| C  | 3.699209  | 0.891967  | -3.158584 |
| H  | 1.557529  | 1.033714  | -2.794743 |
| C  | 4.979190  | 0.794451  | -2.577400 |
| H  | 6.112034  | 0.730354  | -0.719136 |
| H  | 3.587242  | 0.882648  | -4.254358 |
| H  | 5.870494  | 0.705345  | -3.218332 |
| Au | -0.536075 | -0.558889 | -0.617414 |
| H  | 1.449374  | -1.639347 | -2.568837 |
| H  | -0.939897 | -2.232546 | -2.803757 |
| H  | 0.386900  | -3.884049 | 0.382187  |
| C  | -4.772390 | 0.669733  | -0.446442 |
| C  | -5.461300 | -0.412053 | 0.171014  |
| C  | -3.384617 | 0.616615  | -0.662351 |
| C  | -4.684127 | -1.552295 | 0.520928  |
| C  | -2.599738 | -0.504594 | -0.301060 |
| H  | -2.907083 | 1.489305  | -1.140234 |
| C  | -3.299656 | -1.585718 | 0.285404  |
| H  | -5.157988 | -2.430889 | 0.981684  |
| H  | -2.753415 | -2.500259 | 0.574702  |
| H  | -5.317094 | 1.570825  | -0.763435 |
| N  | -6.834980 | -0.358620 | 0.420062  |
| C  | -7.612378 | 0.747795  | -0.102339 |
| H  | -8.668820 | 0.636951  | 0.209236  |
| H  | -7.251822 | 1.724486  | 0.293072  |
| H  | -7.588328 | 0.813296  | -1.218783 |
| C  | -7.521966 | -1.542507 | 0.898260  |
| H  | -7.108230 | -1.892324 | 1.871207  |
| H  | -8.591356 | -1.307752 | 1.061681  |
| H  | -7.464389 | -2.402715 | 0.185437  |

**[(PPh<sub>3</sub>)Au(alkene)--(aniline)]<sup>+</sup> TS Markovnikov**

-1846.45044194 A.U.

|   |           |           |           |
|---|-----------|-----------|-----------|
| P | -1.662362 | -0.256028 | 0.157793  |
| H | 0.218454  | 2.522807  | -3.526684 |
| C | 0.330311  | 2.719857  | -2.446986 |

---

|    |           |           |           |
|----|-----------|-----------|-----------|
| C  | 1.590154  | 2.297942  | -1.841888 |
| C  | 1.369366  | 3.720861  | 0.246386  |
| C  | 2.165223  | 2.962560  | -0.648737 |
| C  | 1.930177  | 4.300300  | 1.396637  |
| C  | 3.543307  | 2.819319  | -0.355085 |
| C  | 3.301589  | 4.151869  | 1.670934  |
| H  | 1.289206  | 4.878599  | 2.081799  |
| C  | 4.106916  | 3.412009  | 0.783256  |
| H  | 4.169014  | 2.208111  | -1.025028 |
| H  | 3.741989  | 4.610040  | 2.570748  |
| H  | 5.182287  | 3.286919  | 0.987657  |
| C  | -1.037812 | -0.117148 | 1.890167  |
| C  | -1.123134 | -1.189097 | 2.805693  |
| C  | -0.404966 | 1.082070  | 2.286100  |
| C  | -0.592781 | -1.054684 | 4.100236  |
| H  | -1.579733 | -2.143104 | 2.497854  |
| C  | 0.126959  | 1.211192  | 3.578415  |
| H  | -0.294511 | 1.908259  | 1.565508  |
| C  | 0.032079  | 0.143884  | 4.489491  |
| H  | -0.659741 | -1.897766 | 4.806287  |
| H  | 0.635410  | 2.146207  | 3.861901  |
| H  | 0.456086  | 0.241299  | 5.501609  |
| C  | -1.516554 | -2.048364 | -0.227930 |
| C  | -2.576623 | -2.800209 | -0.776690 |
| C  | -0.249590 | -2.646840 | -0.046740 |
| C  | -2.365979 | -4.144532 | -1.133711 |
| H  | -3.565220 | -2.337741 | -0.924607 |
| C  | -0.047749 | -3.988440 | -0.401153 |
| H  | 0.581253  | -2.059215 | 0.370974  |
| C  | -1.105227 | -4.740168 | -0.946840 |
| H  | -3.195307 | -4.729768 | -1.562015 |
| H  | 0.949582  | -4.432490 | -0.253097 |
| H  | -0.947039 | -5.793009 | -1.230536 |
| C  | -3.478163 | 0.061131  | 0.243088  |
| C  | -4.286061 | -0.519860 | 1.245915  |
| C  | -4.062718 | 0.890774  | -0.735334 |
| C  | -5.668266 | -0.273605 | 1.262103  |
| H  | -3.835587 | -1.162026 | 2.018894  |
| C  | -5.448579 | 1.128371  | -0.718801 |
| H  | -3.408691 | 1.352431  | -1.496475 |
| C  | -6.251297 | 0.548587  | 0.278772  |
| H  | -6.294889 | -0.723954 | 2.048380  |
| H  | -5.900687 | 1.776460  | -1.486323 |
| H  | -7.336008 | 0.740987  | 0.295819  |
| Au | -0.413332 | 1.075958  | -1.210885 |
| H  | -0.108373 | 3.678545  | -2.123046 |
| H  | 2.332377  | 1.824677  | -2.502135 |
| H  | 0.292826  | 3.841595  | 0.047113  |
| C  | 2.748150  | -2.028785 | -1.528070 |
| C  | 3.200639  | -2.250391 | -0.195863 |
| C  | 2.039571  | -0.861493 | -1.859397 |
| C  | 2.986939  | -1.203259 | 0.749336  |
| C  | 1.770585  | 0.137376  | -0.906050 |
| H  | 1.675249  | -0.747488 | -2.897565 |
| C  | 2.289856  | -0.036979 | 0.387579  |
| H  | 3.346391  | -1.300170 | 1.783689  |
| H  | 2.142311  | 0.744955  | 1.153123  |
| H  | 2.917642  | -2.781872 | -2.310591 |
| N  | 3.808752  | -3.454700 | 0.173537  |
| C  | 4.196159  | -4.400193 | -0.857844 |
| H  | 4.634843  | -5.300326 | -0.386164 |
| H  | 3.316566  | -4.733580 | -1.452696 |
| H  | 4.945780  | -3.985418 | -1.576413 |
| C  | 4.407549  | -3.575522 | 1.490454  |
| H  | 5.251836  | -2.861552 | 1.658323  |
| H  | 3.657300  | -3.397833 | 2.292182  |
| H  | 4.796560  | -4.603107 | 1.625097  |

**[(PPh<sub>3</sub>)Au(alkene)-(para-aniline)]<sup>+</sup> Intermediate Markovnikov**

--1846.54997316 A.U.

|   |           |           |           |
|---|-----------|-----------|-----------|
| P | 1.615984  | -0.422655 | -0.036813 |
| H | -2.018276 | -0.358857 | -3.285314 |
| C | -2.006516 | -1.080118 | -2.438049 |
| C | -3.103653 | -0.655935 | -1.419713 |

---

|    |           |           |           |
|----|-----------|-----------|-----------|
| C  | -2.672230 | -2.868972 | -0.141995 |
| C  | -3.407897 | -1.679970 | -0.321808 |
| C  | -2.951131 | -3.743873 | 0.926414  |
| C  | -4.453586 | -1.408924 | 0.592175  |
| C  | -3.979656 | -3.449458 | 1.835713  |
| H  | -2.355022 | -4.663675 | 1.044524  |
| C  | -4.737225 | -2.275222 | 1.658165  |
| H  | -5.034918 | -0.479492 | 0.472548  |
| H  | -4.197965 | -4.132105 | 2.672804  |
| H  | -5.552965 | -2.033053 | 2.358624  |
| C  | 0.883908  | -0.522113 | 1.657296  |
| C  | 1.063650  | 0.485598  | 2.627738  |
| C  | 0.023413  | -1.608870 | 1.935631  |
| C  | 0.385694  | 0.407245  | 3.857618  |
| H  | 1.712494  | 1.349158  | 2.413502  |
| C  | -0.660586 | -1.677510 | 3.158723  |
| H  | -0.159620 | -2.379421 | 1.169831  |
| C  | -0.482712 | -0.666914 | 4.121418  |
| H  | 0.524104  | 1.202959  | 4.606922  |
| H  | -1.362771 | -2.507060 | 3.336191  |
| H  | -1.031693 | -0.710544 | 5.075376  |
| C  | 2.165776  | 1.329898  | -0.182449 |
| C  | 3.409434  | 1.782377  | 0.310380  |
| C  | 1.268148  | 2.248979  | -0.771189 |
| C  | 3.741348  | 3.146201  | 0.230478  |
| H  | 4.120270  | 1.067689  | 0.755548  |
| C  | 1.607220  | 3.609422  | -0.849526 |
| H  | 0.300311  | 1.898589  | -1.164132 |
| C  | 2.839857  | 4.060756  | -0.345288 |
| H  | 4.712304  | 3.495317  | 0.616609  |
| H  | 0.897847  | 4.314546  | -1.307575 |
| H  | 3.105004  | 5.128265  | -0.408898 |
| C  | 3.167971  | -1.403342 | 0.053290  |
| C  | 3.837449  | -1.660368 | 1.269443  |
| C  | 3.698549  | -1.899720 | -1.157899 |
| C  | 5.036147  | -2.394769 | 1.268193  |
| H  | 3.414695  | -1.289825 | 2.217180  |
| C  | 4.899345  | -2.628034 | -1.153827 |
| H  | 3.156435  | -1.718715 | -2.101054 |
| C  | 5.569527  | -2.875201 | 0.058514  |
| H  | 5.555079  | -2.595666 | 2.218993  |
| H  | 5.308810  | -3.013555 | -2.100901 |
| H  | 6.507322  | -3.453175 | 0.061437  |
| Au | -0.121818 | -0.942447 | -1.523773 |
| H  | -2.232272 | -2.081166 | -2.869503 |
| H  | -4.060597 | -0.518040 | -1.981495 |
| H  | -1.855180 | -3.110747 | -0.837713 |
| C  | -2.404234 | 3.132127  | -1.095197 |
| C  | -1.745687 | 3.233187  | 0.163552  |
| C  | -2.882629 | 1.896232  | -1.560553 |
| C  | -1.644591 | 2.043774  | 0.938308  |
| C  | -2.744654 | 0.710193  | -0.812969 |
| H  | -3.363998 | 1.855112  | -2.552436 |
| C  | -2.130527 | 0.824815  | 0.452492  |
| H  | -1.166570 | 2.051638  | 1.926140  |
| H  | -2.011053 | -0.071348 | 1.078143  |
| H  | -2.534674 | 4.018477  | -1.731741 |
| N  | -1.196695 | 4.431602  | 0.610814  |
| C  | -1.422797 | 5.655165  | -0.130635 |
| H  | -0.964281 | 6.505382  | 0.408805  |
| H  | -0.974423 | 5.626774  | -1.154142 |
| H  | -2.508357 | 5.877895  | -0.255703 |
| C  | -0.426336 | 4.451292  | 1.840048  |
| H  | -1.048326 | 4.244011  | 2.744138  |
| H  | 0.394409  | 3.698359  | 1.812889  |
| H  | 0.039884  | 5.446499  | 1.968051  |

**[(PPh<sub>3</sub>)Au(alkene)--(aniline)]<sup>+</sup> TS anti-Markovnikov**

-1846.45504741 A.U.

|   |           |           |           |
|---|-----------|-----------|-----------|
| P | 0.631301  | 1.275045  | 0.051083  |
| H | 1.782995  | -2.368048 | -2.734832 |
| C | 1.330157  | -2.618739 | -1.761200 |
| C | -0.091868 | -2.935866 | -1.736855 |
| C | 3.660409  | -2.806340 | -0.842311 |

---

|    |           |           |           |
|----|-----------|-----------|-----------|
| C  | 2.253894  | -2.958176 | -0.670507 |
| C  | 4.558068  | -3.058778 | 0.202372  |
| C  | 1.806370  | -3.393273 | 0.612662  |
| C  | 4.094060  | -3.482403 | 1.465888  |
| H  | 5.638699  | -2.922512 | 0.031274  |
| C  | 2.709271  | -3.649162 | 1.654408  |
| H  | 0.727096  | -3.497603 | 0.804032  |
| H  | 4.801222  | -3.679709 | 2.286824  |
| H  | 2.322408  | -3.971073 | 2.635165  |
| C  | 1.523560  | 1.036039  | 1.644163  |
| C  | 1.237816  | 1.819961  | 2.783282  |
| C  | 2.527670  | 0.041661  | 1.707843  |
| C  | 1.958009  | 1.614253  | 3.973284  |
| H  | 0.446264  | 2.585006  | 2.742734  |
| C  | 3.241631  | -0.156970 | 2.899826  |
| H  | 2.742726  | -0.594898 | 0.832774  |
| C  | 2.959648  | 0.628368  | 4.032630  |
| H  | 1.729409  | 2.225286  | 4.861083  |
| H  | 4.006238  | -0.948510 | 2.934346  |
| H  | 3.516774  | 0.465904  | 4.969200  |
| C  | -0.921438 | 2.183361  | 0.479880  |
| C  | -1.009901 | 3.593136  | 0.485410  |
| C  | -2.064157 | 1.410384  | 0.782932  |
| C  | -2.230072 | 4.216871  | 0.801324  |
| H  | -0.128970 | 4.204490  | 0.232313  |
| C  | -3.280981 | 2.037970  | 1.094161  |
| H  | -2.009179 | 0.311655  | 0.753372  |
| C  | -3.365259 | 3.442281  | 1.104496  |
| H  | -2.295551 | 5.316736  | 0.801735  |
| H  | -4.166355 | 1.415026  | 1.302300  |
| H  | -4.321320 | 3.937441  | 1.338968  |
| C  | 1.623149  | 2.511586  | -0.884593 |
| C  | 2.504463  | 3.405147  | -0.239759 |
| C  | 1.470769  | 2.567294  | -2.287112 |
| C  | 3.221525  | 4.350308  | -0.995154 |
| H  | 2.635976  | 3.356034  | 0.852905  |
| C  | 2.180612  | 3.519698  | -3.034993 |
| H  | 0.802278  | 1.847058  | -2.788042 |
| C  | 3.057923  | 4.412076  | -2.390056 |
| H  | 3.914930  | 5.040470  | -0.488734 |
| H  | 2.057616  | 3.558643  | -4.128921 |
| H  | 3.622486  | 5.152140  | -2.979151 |
| Au | 0.343142  | -0.732795 | -0.949017 |
| H  | -0.420812 | -3.736949 | -1.053595 |
| H  | -0.598842 | -2.962465 | -2.715094 |
| H  | 4.040157  | -2.460658 | -1.818083 |
| C  | -3.962661 | -0.857635 | -1.268810 |
| C  | -4.384909 | -1.202018 | 0.048062  |
| C  | -2.661365 | -1.150179 | -1.705634 |
| C  | -3.472740 | -1.948324 | 0.850789  |
| C  | -1.722016 | -1.787958 | -0.870168 |
| H  | -2.365794 | -0.831509 | -2.721736 |
| C  | -2.174311 | -2.222793 | 0.393155  |
| H  | -3.761750 | -2.291709 | 1.854199  |
| H  | -1.488179 | -2.768668 | 1.065204  |
| H  | -4.642515 | -0.332763 | -1.954454 |
| N  | -5.628491 | -0.803565 | 0.540581  |
| C  | -6.565423 | -0.130895 | -0.341657 |
| H  | -7.460883 | 0.171158  | 0.234198  |
| H  | -6.118212 | 0.792991  | -0.771211 |
| H  | -6.903279 | -0.769462 | -1.194519 |
| C  | -6.104787 | -1.336371 | 1.805502  |
| H  | -6.215087 | -2.448061 | 1.795903  |
| H  | -5.418756 | -1.075491 | 2.642118  |
| H  | -7.092787 | -0.896931 | 2.040135  |

**[(PPh<sub>3</sub>)Au(alkene)-(para-aniline)]<sup>+</sup> Intermediate anti-Markovnikov**

-1846.54542765 A.U.

|   |           |           |           |
|---|-----------|-----------|-----------|
| P | 1.363795  | 0.940601  | 0.014354  |
| H | -0.067496 | -3.014919 | -2.615992 |
| C | -0.545764 | -2.655099 | -1.680538 |
| C | -2.087044 | -2.640059 | -1.880964 |
| C | 1.259145  | -4.101481 | -0.634198 |
| C | -0.002735 | -3.454959 | -0.523746 |

---

|    |           |           |           |
|----|-----------|-----------|-----------|
| C  | 1.846003  | -4.763242 | 0.454659  |
| C  | -0.655990 | -3.530525 | 0.735113  |
| C  | 1.185596  | -4.815051 | 1.697869  |
| H  | 2.828077  | -5.248723 | 0.331005  |
| C  | -0.070685 | -4.194737 | 1.825114  |
| H  | -1.619965 | -3.019955 | 0.868213  |
| H  | 1.642150  | -5.337689 | 2.553531  |
| H  | -0.601756 | -4.220726 | 2.790792  |
| C  | 2.030289  | 0.267004  | 1.598119  |
| C  | 2.300127  | 1.117035  | 2.695211  |
| C  | 2.241181  | -1.124958 | 1.725023  |
| C  | 2.794916  | 0.581280  | 3.895530  |
| H  | 2.106922  | 2.199008  | 2.615100  |
| C  | 2.730001  | -1.654546 | 2.931098  |
| H  | 1.999624  | -1.808271 | 0.893254  |
| C  | 3.011507  | -0.804606 | 4.014474  |
| H  | 3.001491  | 1.248903  | 4.747158  |
| H  | 2.867475  | -2.743627 | 3.015456  |
| H  | 3.388953  | -1.222942 | 4.961281  |
| C  | 0.224637  | 2.279885  | 0.559329  |
| C  | 0.611407  | 3.636280  | 0.617673  |
| C  | -1.077749 | 1.900821  | 0.955609  |
| C  | -0.296990 | 4.603340  | 1.083538  |
| H  | 1.620802  | 3.936321  | 0.293306  |
| C  | -1.976394 | 2.869812  | 1.429543  |
| H  | -1.396796 | 0.848382  | 0.876146  |
| C  | -1.587087 | 4.220683  | 1.493476  |
| H  | 0.006374  | 5.661699  | 1.125046  |
| H  | -2.993971 | 2.559848  | 1.716482  |
| H  | -2.296720 | 4.981340  | 1.856787  |
| C  | 2.754592  | 1.818645  | -0.806099 |
| C  | 3.985796  | 2.093968  | -0.175223 |
| C  | 2.548860  | 2.221403  | -2.145659 |
| C  | 4.995157  | 2.778356  | -0.876132 |
| H  | 4.159854  | 1.768436  | 0.862129  |
| C  | 3.555619  | 2.913348  | -2.836303 |
| H  | 1.595731  | 1.977374  | -2.644078 |
| C  | 4.780882  | 3.192987  | -2.202037 |
| H  | 5.956653  | 2.986912  | -0.380577 |
| H  | 3.388323  | 3.225506  | -3.879267 |
| H  | 5.574374  | 3.727904  | -2.747633 |
| Au | 0.324389  | -0.784142 | -1.155920 |
| H  | -2.507243 | -3.624754 | -1.570977 |
| H  | -2.270233 | -2.562002 | -2.974313 |
| H  | 1.793709  | -4.054491 | -1.597893 |
| C  | -3.558170 | 0.838337  | -1.123010 |
| C  | -4.343479 | 0.624189  | 0.045138  |
| C  | -2.847139 | -0.211822 | -1.715199 |
| C  | -4.402722 | -0.704233 | 0.546335  |
| C  | -2.881620 | -1.530286 | -1.207121 |
| H  | -2.243431 | -0.000402 | -2.613545 |
| C  | -3.689843 | -1.744131 | -0.074572 |
| H  | -5.016472 | -0.945150 | 1.424797  |
| H  | -3.783991 | -2.763610 | 0.335835  |
| H  | -3.485496 | 1.838001  | -1.571336 |
| N  | -5.022480 | 1.681228  | 0.670160  |
| C  | -5.202540 | 2.923867  | -0.065756 |
| H  | -5.759122 | 3.644281  | 0.564077  |
| H  | -4.223657 | 3.390358  | -0.309499 |
| H  | -5.764377 | 2.788440  | -1.022556 |
| C  | -5.980759 | 1.374247  | 1.719258  |
| H  | -5.494427 | 0.829063  | 2.556232  |
| H  | -6.384911 | 2.317683  | 2.134277  |
| H  | -6.840741 | 0.752852  | 1.364721  |

### Using CH<sub>2</sub>=CHPh(Me on para) as alkene:

[(PPh<sub>3</sub>)Au(alkene)]<sup>+</sup>

-1520.24685521 A.U.

|   |           |           |           |
|---|-----------|-----------|-----------|
| P | 1.228543  | 0.203736  | 0.007402  |
| H | -1.285824 | -4.175936 | -0.273809 |
| C | -1.755633 | -3.221388 | -0.562953 |
| C | -2.394434 | -2.448722 | 0.414955  |
| C | -3.595514 | -0.762379 | -1.054879 |



---

|    |           |           |           |
|----|-----------|-----------|-----------|
| C  | -3.251941 | -1.271797 | 0.225479  |
| C  | -4.328401 | 0.418737  | -1.173218 |
| C  | -3.686717 | -0.559410 | 1.372242  |
| C  | -4.755579 | 1.140861  | -0.028708 |
| H  | -4.579391 | 0.801625  | -2.175309 |
| C  | -4.422385 | 0.625767  | 1.244243  |
| H  | -3.427895 | -0.935924 | 2.375181  |
| H  | -4.744549 | 1.164677  | 2.149323  |
| C  | 0.337817  | 1.771437  | -0.321656 |
| C  | 0.992542  | 2.839845  | -0.973223 |
| C  | -0.998206 | 1.919131  | 0.116546  |
| C  | 0.312827  | 4.053284  | -1.173511 |
| H  | 2.029087  | 2.723320  | -1.327202 |
| C  | -1.666669 | 3.136204  | -0.085976 |
| H  | -1.525215 | 1.085034  | 0.609475  |
| C  | -1.013139 | 4.203411  | -0.729108 |
| H  | 0.823094  | 4.885460  | -1.682671 |
| H  | -2.706520 | 3.244689  | 0.257049  |
| H  | -1.541519 | 5.155911  | -0.890603 |
| C  | 2.591836  | 0.099699  | -1.204912 |
| C  | 3.902532  | 0.493372  | -0.859735 |
| C  | 2.300577  | -0.336945 | -2.517004 |
| C  | 4.916360  | 0.453193  | -1.832643 |
| H  | 4.131943  | 0.825992  | 0.164830  |
| C  | 3.318811  | -0.370573 | -3.481752 |
| H  | 1.276972  | -0.651113 | -2.781848 |
| C  | 4.626209  | 0.024232  | -3.139862 |
| H  | 5.939972  | 0.757426  | -1.564790 |
| H  | 3.093442  | -0.712220 | -4.503783 |
| H  | 5.424810  | -0.008471 | -3.897163 |
| C  | 1.992882  | 0.346940  | 1.661367  |
| C  | 2.143373  | 1.601929  | 2.289795  |
| C  | 2.478335  | -0.825633 | 2.283702  |
| C  | 2.787292  | 1.678289  | 3.537096  |
| H  | 1.759115  | 2.515026  | 1.808914  |
| C  | 3.123499  | -0.737857 | 3.526769  |
| H  | 2.352008  | -1.805341 | 1.793350  |
| C  | 3.277967  | 0.513453  | 4.153189  |
| H  | 2.905015  | 2.655746  | 4.029938  |
| H  | 3.503539  | -1.650271 | 4.011623  |
| H  | 3.780195  | 0.579250  | 5.130873  |
| Au | -0.263254 | -1.565920 | -0.121055 |
| H  | -1.975322 | -3.093460 | -1.637303 |
| H  | -3.272405 | -1.289219 | -1.965704 |
| H  | -2.293706 | -2.784489 | 1.465026  |
| C  | -5.558308 | 2.406726  | -0.179300 |
| H  | -5.164833 | 3.042484  | -0.999537 |
| H  | -6.613058 | 2.167915  | -0.439503 |
| H  | -5.575668 | 3.002675  | 0.754344  |

**[(PPh<sub>3</sub>)Au(alkene)Cl]**

-1980.59126364 A.U.

|   |           |           |           |
|---|-----------|-----------|-----------|
| P | -0.944771 | 0.513818  | -0.016280 |
| H | 0.559359  | -3.953627 | -1.573405 |
| C | 1.098718  | -3.280789 | -0.886778 |
| C | 1.529663  | -2.005717 | -1.350912 |
| C | 3.264940  | -1.518091 | 0.453832  |
| C | 2.587756  | -1.162131 | -0.737128 |
| C | 4.175115  | -0.636039 | 1.055426  |
| C | 2.889368  | 0.094842  | -1.315768 |
| C | 4.442167  | 0.636256  | 0.502924  |
| H | 4.678749  | -0.936853 | 1.988840  |
| C | 3.788764  | 0.975507  | -0.702823 |
| H | 2.379234  | 0.398474  | -2.243418 |
| H | 3.974648  | 1.958864  | -1.165140 |
| C | -0.246782 | 1.363868  | 1.455051  |
| C | -0.948749 | 2.360301  | 2.164784  |
| C | 1.067992  | 1.019596  | 1.839908  |
| C | -0.330839 | 3.011852  | 3.247144  |
| H | -1.977261 | 2.624877  | 1.872975  |
| C | 1.682625  | 1.681984  | 2.913019  |
| H | 1.614915  | 0.233496  | 1.297821  |
| C | 0.984217  | 2.678984  | 3.619300  |
| H | -0.883134 | 3.785494  | 3.803850  |

|    |           |           |           |
|----|-----------|-----------|-----------|
| H  | 2.710058  | 1.405545  | 3.198223  |
| H  | 1.462803  | 3.193397  | 4.467794  |
| C  | -2.729236 | 0.931654  | -0.043053 |
| C  | -3.204346 | 2.119103  | -0.644145 |
| C  | -3.627445 | 0.045242  | 0.592670  |
| C  | -4.575668 | 2.421329  | -0.601854 |
| H  | -2.501853 | 2.803090  | -1.146839 |
| C  | -4.996313 | 0.361142  | 0.631750  |
| H  | -3.253007 | -0.896257 | 1.035010  |
| C  | -5.471291 | 1.544534  | 0.038209  |
| H  | -4.946825 | 3.345460  | -1.072919 |
| H  | -5.696860 | -0.331930 | 1.123706  |
| H  | -6.546533 | 1.783211  | 0.067587  |
| C  | -0.219998 | 1.432049  | -1.439783 |
| C  | 0.552954  | 2.600733  | -1.284988 |
| C  | -0.396064 | 0.878572  | -2.728626 |
| C  | 1.150975  | 3.202221  | -2.407298 |
| H  | 0.706208  | 3.030537  | -0.283148 |
| C  | 0.194284  | 1.486801  | -3.846694 |
| H  | -0.982655 | -0.047844 | -2.847081 |
| C  | 0.976690  | 2.647393  | -3.686595 |
| H  | 1.762835  | 4.108963  | -2.277225 |
| H  | 0.054604  | 1.047500  | -4.847039 |
| H  | 1.452600  | 3.116607  | -4.562069 |
| Au | -0.319058 | -1.778932 | -0.125903 |
| H  | 1.587487  | -3.779686 | -0.033461 |
| H  | 1.258307  | -1.713455 | -2.382278 |
| H  | 3.058760  | -2.486647 | 0.934137  |
| Cl | -1.874780 | -2.977651 | 1.326480  |
| C  | 5.358443  | 1.621766  | 1.189815  |
| H  | 5.951364  | 1.143511  | 1.995137  |
| H  | 6.065938  | 2.091166  | 0.474501  |
| H  | 4.771046  | 2.446720  | 1.650481  |

**[(PPh<sub>3</sub>)Au(alkene)(*para*-aniline)]<sup>+</sup>**

-1886.24440731 A.U.

|   |           |           |           |
|---|-----------|-----------|-----------|
| P | -0.116786 | 0.856962  | -0.251686 |
| H | 0.981245  | -3.556742 | -2.269214 |
| C | 1.428072  | -3.134446 | -1.353778 |
| C | 2.213959  | -1.967174 | -1.445486 |
| C | 3.481866  | -2.145991 | 0.750318  |
| C | 3.169781  | -1.455598 | -0.446348 |
| C | 4.325906  | -1.568520 | 1.707737  |
| C | 3.761869  | -0.185771 | -0.659281 |
| C | 4.882945  | -0.282512 | 1.517407  |
| H | 4.557864  | -2.126658 | 2.629263  |
| C | 4.592251  | 0.389315  | 0.307840  |
| H | 3.543755  | 0.363509  | -1.588430 |
| H | 5.021895  | 1.387308  | 0.124622  |
| C | 0.553811  | 1.334746  | 1.388407  |
| C | 0.313229  | 2.616851  | 1.937650  |
| C | 1.410398  | 0.437854  | 2.060661  |
| C | 0.928323  | 2.988288  | 3.144191  |
| H | -0.352624 | 3.326682  | 1.422347  |
| C | 2.024559  | 0.816774  | 3.265291  |
| H | 1.617020  | -0.556872 | 1.635806  |
| C | 1.785062  | 2.090594  | 3.808890  |
| H | 0.738306  | 3.987029  | 3.567277  |
| H | 2.696490  | 0.108819  | 3.774401  |
| H | 2.264027  | 2.386360  | 4.755409  |
| C | -1.720708 | 1.744511  | -0.402982 |
| C | -2.093464 | 2.367623  | -1.614016 |
| C | -2.587534 | 1.806511  | 0.710685  |
| C | -3.318562 | 3.049801  | -1.705467 |
| H | -1.420050 | 2.341286  | -2.484522 |
| C | -3.794983 | 2.515227  | 0.620171  |
| H | -2.306802 | 1.314024  | 1.654775  |
| C | -4.166689 | 3.133879  | -0.587223 |
| H | -3.600733 | 3.536099  | -2.652157 |
| H | -4.452907 | 2.584326  | 1.499980  |
| H | -5.115321 | 3.688953  | -0.654143 |
| C | 1.002886  | 1.664157  | -1.478266 |
| C | 1.896396  | 2.692150  | -1.112501 |
| C | 1.006637  | 1.177634  | -2.806169 |

|    |           |           |           |
|----|-----------|-----------|-----------|
| C  | 2.786028  | 3.220369  | -2.064339 |
| H  | 1.921952  | 3.064571  | -0.077677 |
| C  | 1.890696  | 1.715024  | -3.755743 |
| H  | 0.325384  | 0.359305  | -3.094624 |
| C  | 2.787881  | 2.733451  | -3.383267 |
| H  | 3.488525  | 4.015170  | -1.768859 |
| H  | 1.886758  | 1.330234  | -4.787458 |
| H  | 3.491588  | 3.145453  | -4.123082 |
| Au | 0.066106  | -1.471603 | -0.654925 |
| H  | 1.557293  | -3.840806 | -0.516145 |
| H  | 2.244064  | -1.445387 | -2.419762 |
| H  | 3.061608  | -3.145841 | 0.939834  |
| C  | -3.714528 | -1.553115 | -0.637372 |
| C  | -3.884331 | -1.186688 | 0.737342  |
| C  | -2.708044 | -2.434112 | -1.023751 |
| C  | -2.927107 | -1.684505 | 1.680944  |
| C  | -1.781193 | -2.966818 | -0.077270 |
| H  | -2.643757 | -2.747307 | -2.077730 |
| C  | -1.920859 | -2.563529 | 1.284071  |
| H  | -2.995032 | -1.410637 | 2.741638  |
| H  | -1.192284 | -3.862491 | -0.328871 |
| H  | -1.238852 | -2.976786 | 2.043709  |
| H  | -4.400130 | -1.169398 | -1.403046 |
| N  | -4.937200 | -0.401506 | 1.135660  |
| C  | -5.941018 | 0.022326  | 0.164952  |
| H  | -6.701754 | 0.641674  | 0.673023  |
| H  | -5.488629 | 0.641196  | -0.640166 |
| H  | -6.458881 | -0.846043 | -0.300060 |
| C  | -5.128695 | -0.093213 | 2.547197  |
| H  | -4.259385 | 0.458188  | 2.970380  |
| H  | -6.021341 | 0.547061  | 2.664601  |
| H  | -5.283268 | -1.010397 | 3.158748  |
| C  | 5.736780  | 0.372141  | 2.574392  |
| H  | 6.039798  | -0.341042 | 3.365907  |
| H  | 6.655255  | 0.816260  | 2.137921  |
| H  | 5.178999  | 1.202271  | 3.061713  |

**[(PPh<sub>3</sub>)Au(alkene)(*ortho*-aniline)]<sup>+</sup>**

-1886.24966838 A.U.

|   |           |           |           |
|---|-----------|-----------|-----------|
| P | -0.270180 | 1.047592  | 0.017867  |
| H | -0.036651 | -2.961967 | -2.944497 |
| C | 0.625661  | -2.763784 | -2.085872 |
| C | 1.493894  | -1.651893 | -2.128015 |
| C | 3.073151  | -2.317347 | -0.249941 |
| C | 2.640568  | -1.394351 | -1.234075 |
| C | 4.084734  | -1.972987 | 0.655871  |
| C | 3.283903  | -0.132198 | -1.295588 |
| C | 4.696074  | -0.698122 | 0.625533  |
| H | 4.407142  | -2.708781 | 1.410215  |
| C | 4.281938  | 0.208387  | -0.377951 |
| H | 2.969078  | 0.599732  | -2.055782 |
| H | 4.746814  | 1.205785  | -0.433064 |
| C | 0.697376  | 1.198105  | 1.568225  |
| C | 0.698596  | 2.389901  | 2.332333  |
| C | 1.532277  | 0.126305  | 1.949235  |
| C | 1.518667  | 2.493526  | 3.467924  |
| H | 0.060530  | 3.239640  | 2.042937  |
| C | 2.352973  | 0.238357  | 3.082508  |
| H | 1.552327  | -0.800102 | 1.355650  |
| C | 2.345436  | 1.418656  | 3.845552  |
| H | 1.512360  | 3.421089  | 4.061229  |
| H | 3.002830  | -0.604649 | 3.363540  |
| H | 2.985023  | 1.504301  | 4.737929  |
| C | -1.846816 | 1.964486  | 0.269527  |
| C | -2.516449 | 2.521251  | -0.843180 |
| C | -2.429156 | 2.069853  | 1.552518  |
| C | -3.749032 | 3.173576  | -0.671492 |
| H | -2.072305 | 2.463126  | -1.848661 |
| C | -3.657276 | 2.732355  | 1.718836  |
| H | -1.919955 | 1.640190  | 2.426888  |
| C | -4.321368 | 3.283436  | 0.609015  |
| H | -4.259286 | 3.609084  | -1.544564 |
| H | -4.095086 | 2.819784  | 2.725527  |
| H | -5.282365 | 3.803991  | 0.741817  |

---

|    |           |           |           |
|----|-----------|-----------|-----------|
| C  | 0.667745  | 2.024095  | -1.240157 |
| C  | 1.670504  | 2.947013  | -0.877130 |
| C  | 0.419787  | 1.771184  | -2.609431 |
| C  | 2.413472  | 3.605834  | -1.872268 |
| H  | 1.896736  | 3.134487  | 0.182761  |
| C  | 1.155013  | 2.441720  | -3.600222 |
| H  | -0.335250 | 1.022584  | -2.902696 |
| C  | 2.158910  | 3.356609  | -3.232281 |
| H  | 3.202128  | 4.316459  | -1.579759 |
| H  | 0.953009  | 2.239226  | -4.663568 |
| H  | 2.746972  | 3.871367  | -4.007776 |
| Au | -0.321774 | -1.182094 | -0.778614 |
| H  | 0.840561  | -3.631528 | -1.440937 |
| H  | 1.402495  | -0.956701 | -2.982237 |
| H  | 2.613177  | -3.315714 | -0.187328 |
| C  | -1.823610 | -2.719721 | 0.428003  |
| C  | -2.891730 | -1.779348 | 0.684427  |
| C  | -0.836980 | -2.974533 | 1.429377  |
| C  | -2.852222 | -1.072736 | 1.927954  |
| C  | -0.819279 | -2.258462 | 2.626617  |
| H  | -0.083265 | -3.753524 | 1.233425  |
| C  | -1.840679 | -1.308450 | 2.858539  |
| H  | -3.632057 | -0.339081 | 2.162868  |
| H  | -0.038108 | -2.435702 | 3.379299  |
| H  | -1.845955 | -0.740077 | 3.802216  |
| H  | -1.918407 | -3.442552 | -0.395114 |
| N  | -3.887074 | -1.569767 | -0.236655 |
| C  | -3.776231 | -2.174808 | -1.554278 |
| H  | -4.644006 | -1.883859 | -2.172409 |
| H  | -2.842377 | -1.844297 | -2.077119 |
| H  | -3.756616 | -3.284350 | -1.500315 |
| C  | -4.865178 | -0.503567 | -0.029701 |
| H  | -4.392832 | 0.503807  | -0.032912 |
| H  | -5.617279 | -0.539329 | -0.838315 |
| H  | -5.405635 | -0.635718 | 0.930563  |
| C  | 5.737845  | -0.296735 | 1.639277  |
| H  | 6.060202  | -1.150698 | 2.266861  |
| H  | 6.637440  | 0.130340  | 1.149160  |
| H  | 5.335875  | 0.489869  | 2.315155  |

**[(PPh<sub>3</sub>)Au(*para*-aniline)+(PPh<sub>3</sub>)Au(alkene)]<sup>+</sup> adduct**  
-3057.37015216 A.U.

|   |           |           |           |
|---|-----------|-----------|-----------|
| P | 3.932148  | -0.739968 | 0.049221  |
| H | -0.747222 | -0.211571 | -1.098365 |
| C | -0.146945 | 0.716042  | -1.090421 |
| C | -0.340768 | 1.566475  | 0.030226  |
| C | 0.490222  | 3.735679  | -0.940582 |
| C | 0.000037  | 2.962574  | 0.152045  |
| C | 0.797099  | 5.084588  | -0.779697 |
| C | -0.179858 | 3.621513  | 1.399196  |
| C | 0.617150  | 5.738658  | 0.467349  |
| H | 1.175986  | 5.661107  | -1.639262 |
| C | 0.142765  | 4.972845  | 1.555633  |
| H | -0.582547 | 3.051473  | 2.250758  |
| H | 0.000938  | 5.454034  | 2.536430  |
| C | 5.205455  | 0.047483  | -1.009412 |
| C | 6.308115  | -0.680350 | -1.507252 |
| C | 5.085252  | 1.427914  | -1.286159 |
| C | 7.287561  | -0.024260 | -2.272829 |
| H | 6.397433  | -1.759616 | -1.305450 |
| C | 6.070352  | 2.075915  | -2.047945 |
| H | 4.215720  | 1.990971  | -0.907341 |
| C | 7.171114  | 1.351102  | -2.541357 |
| H | 8.145551  | -0.593136 | -2.663649 |
| H | 5.975264  | 3.151465  | -2.263719 |
| H | 7.939435  | 1.860378  | -3.143762 |
| C | 4.055821  | -2.540285 | -0.283206 |
| C | 4.444882  | -3.470694 | 0.701430  |
| C | 3.661576  | -2.991114 | -1.564173 |
| C | 4.430286  | -4.846245 | 0.406377  |
| H | 4.752117  | -3.126017 | 1.701046  |
| C | 3.662291  | -4.363243 | -1.855861 |
| H | 3.343412  | -2.264067 | -2.329399 |
| C | 4.040212  | -5.293466 | -0.867970 |

---

|    |           |           |           |
|----|-----------|-----------|-----------|
| H  | 4.727261  | -5.571658 | 1.179591  |
| H  | 3.356853  | -4.710256 | -2.855152 |
| H  | 4.029936  | -6.371070 | -1.093900 |
| C  | 4.489033  | -0.480801 | 1.776648  |
| C  | 5.852565  | -0.629168 | 2.117546  |
| C  | 3.545591  | -0.147311 | 2.772055  |
| C  | 6.259584  | -0.464854 | 3.451222  |
| H  | 6.595946  | -0.865605 | 1.339467  |
| C  | 3.960363  | 0.016628  | 4.104394  |
| H  | 2.487937  | -0.011499 | 2.495729  |
| C  | 5.314926  | -0.145939 | 4.444867  |
| H  | 7.322121  | -0.580411 | 3.715948  |
| H  | 3.223048  | 0.279269  | 4.878943  |
| H  | 5.639614  | -0.014735 | 5.488878  |
| Au | 1.791028  | 0.034394  | -0.410923 |
| H  | -0.000790 | 1.170630  | -2.087085 |
| H  | -0.763027 | 1.095956  | 0.935363  |
| H  | 0.627171  | 3.262668  | -1.924456 |
| P  | -3.139902 | -2.098447 | 0.025729  |
| C  | -3.163924 | 4.448694  | 0.938267  |
| C  | -2.699605 | 5.079421  | -0.255921 |
| C  | -3.467566 | 3.082623  | 0.959183  |
| C  | -2.630692 | 4.274635  | -1.432455 |
| C  | -3.334435 | 2.254832  | -0.186028 |
| H  | -3.808759 | 2.645689  | 1.912240  |
| C  | -2.933124 | 2.910510  | -1.382201 |
| H  | -2.322177 | 4.712760  | -2.391223 |
| H  | -2.832670 | 2.327798  | -2.313084 |
| C  | -4.216039 | -3.076012 | 1.141215  |
| C  | -3.735351 | -4.185239 | 1.871959  |
| C  | -5.574852 | -2.701991 | 1.237090  |
| C  | -4.616050 | -4.920670 | 2.683083  |
| H  | -2.672536 | -4.469712 | 1.811408  |
| C  | -6.449694 | -3.444791 | 2.046735  |
| H  | -5.940385 | -1.822951 | 0.680597  |
| C  | -5.971540 | -4.553636 | 2.768529  |
| H  | -4.240856 | -5.784489 | 3.254033  |
| H  | -7.508347 | -3.151157 | 2.120557  |
| H  | -6.657819 | -5.131183 | 3.407512  |
| C  | -1.429992 | -2.345170 | 0.684182  |
| C  | -0.475588 | -3.172150 | 0.055484  |
| C  | -1.080881 | -1.645714 | 1.862867  |
| C  | 0.810585  | -3.309940 | 0.609418  |
| H  | -0.736766 | -3.710021 | -0.869325 |
| C  | 0.201007  | -1.790805 | 2.414369  |
| H  | -1.823397 | -0.989577 | 2.346979  |
| C  | 1.147550  | -2.624872 | 1.789351  |
| H  | 1.555201  | -3.953864 | 0.117388  |
| H  | 0.462334  | -1.254872 | 3.340472  |
| H  | 2.153602  | -2.736333 | 2.220910  |
| C  | -3.135120 | -2.977865 | -1.587004 |
| C  | -3.440967 | -4.351679 | -1.693653 |
| C  | -2.767364 | -2.248603 | -2.740329 |
| C  | -3.369772 | -4.989422 | -2.944113 |
| H  | -3.742023 | -4.922076 | -0.800818 |
| C  | -2.691516 | -2.893358 | -3.985744 |
| H  | -2.553865 | -1.169551 | -2.659269 |
| C  | -2.992342 | -4.264013 | -4.088508 |
| H  | -3.616472 | -6.059664 | -3.025062 |
| H  | -2.409673 | -2.319939 | -4.882728 |
| H  | -2.943071 | -4.766684 | -5.067163 |
| Au | -3.489727 | 0.214762  | -0.098447 |
| H  | -3.283181 | 5.030060  | 1.862701  |
| N  | -2.311059 | 6.410804  | -0.265736 |
| C  | -2.534347 | 7.238405  | 0.910145  |
| H  | -2.098991 | 8.240484  | 0.741388  |
| H  | -3.616559 | 7.362646  | 1.148317  |
| H  | -2.036445 | 6.802183  | 1.802181  |
| C  | -2.007863 | 7.063738  | -1.530267 |
| H  | -2.882284 | 7.082504  | -2.221634 |
| H  | -1.698992 | 8.107964  | -1.338898 |
| H  | -1.169555 | 6.552457  | -2.050326 |
| C  | 0.971320  | 7.194757  | 0.625969  |
| H  | 0.473842  | 7.647531  | 1.506129  |

---

|   |          |          |           |
|---|----------|----------|-----------|
| H | 2.067779 | 7.321869 | 0.764311  |
| H | 0.691759 | 7.778837 | -0.274544 |

**[(PPh<sub>3</sub>)Au(*para*-aniline)--(PPh<sub>3</sub>)Au(alkene)]<sup>+</sup> TS Markovnikov**

-3057.35146844 A.U.

|    |           |           |           |
|----|-----------|-----------|-----------|
| P  | 3.458935  | -1.801716 | -0.020118 |
| H  | -0.949560 | -0.043586 | -1.494951 |
| C  | -0.019892 | 0.552271  | -1.395686 |
| C  | -0.025701 | 1.438242  | -0.199541 |
| C  | 1.821025  | 3.001553  | -0.999558 |
| C  | 1.146636  | 2.332387  | 0.045722  |
| C  | 2.901528  | 3.858180  | -0.731687 |
| C  | 1.606157  | 2.547880  | 1.366458  |
| C  | 3.354535  | 4.078014  | 0.585950  |
| H  | 3.413441  | 4.359122  | -1.569797 |
| C  | 2.691024  | 3.393057  | 1.631122  |
| H  | 1.098567  | 2.032873  | 2.198333  |
| H  | 3.033759  | 3.529260  | 2.670102  |
| C  | 4.950932  | -0.728404 | -0.192609 |
| C  | 6.261426  | -1.245109 | -0.282634 |
| C  | 4.750676  | 0.672425  | -0.230139 |
| C  | 7.357087  | -0.371168 | -0.386240 |
| H  | 6.435488  | -2.331072 | -0.290933 |
| C  | 5.851700  | 1.538647  | -0.322957 |
| H  | 3.732247  | 1.094110  | -0.206452 |
| C  | 7.156243  | 1.020413  | -0.398859 |
| H  | 8.375263  | -0.783754 | -0.462321 |
| H  | 5.678110  | 2.624951  | -0.352406 |
| H  | 8.018278  | 1.700780  | -0.481696 |
| C  | 3.893185  | -3.486529 | -0.584789 |
| C  | 4.823097  | -4.305795 | 0.099348  |
| C  | 3.263016  | -3.972103 | -1.752497 |
| C  | 5.119062  | -5.589392 | -0.387284 |
| H  | 5.307286  | -3.946911 | 1.021458  |
| C  | 3.565540  | -5.256654 | -2.235516 |
| H  | 2.532486  | -3.334798 | -2.277902 |
| C  | 4.492853  | -6.064683 | -1.554617 |
| H  | 5.842236  | -6.223524 | 0.148963  |
| H  | 3.073150  | -5.627942 | -3.147732 |
| H  | 4.727883  | -7.071967 | -1.932620 |
| C  | 3.144123  | -1.914568 | 1.798262  |
| C  | 2.999940  | -0.697862 | 2.505268  |
| C  | 2.871891  | -3.133019 | 2.455865  |
| C  | 2.595683  | -0.704316 | 3.848517  |
| H  | 3.188538  | 0.262165  | 1.999217  |
| C  | 2.468277  | -3.132674 | 3.803911  |
| H  | 2.958042  | -4.089997 | 1.919602  |
| C  | 2.326415  | -1.921737 | 4.502523  |
| H  | 2.488777  | 0.249643  | 4.388841  |
| H  | 2.258737  | -4.089470 | 4.307211  |
| H  | 2.007358  | -1.925690 | 5.556397  |
| Au | 1.583499  | -0.742159 | -0.917945 |
| H  | 0.186318  | 1.072948  | -2.352551 |
| H  | -0.331101 | 0.912507  | 0.722488  |
| H  | 1.502241  | 2.842545  | -2.039374 |
| P  | -3.984107 | -0.884507 | 0.063336  |
| C  | -0.831227 | 4.804092  | 0.946418  |
| C  | -0.424428 | 5.392973  | -0.299983 |
| C  | -1.372280 | 3.532510  | 0.967863  |
| C  | -0.811175 | 4.719789  | -1.512569 |
| C  | -1.565616 | 2.738249  | -0.223525 |
| H  | -1.587396 | 3.075885  | 1.948454  |
| C  | -1.356290 | 3.449997  | -1.459406 |
| H  | -0.615512 | 5.178907  | -2.490633 |
| H  | -1.548659 | 2.922387  | -2.408452 |
| C  | -4.909869 | -1.514221 | -1.386720 |
| C  | -5.869629 | -2.542565 | -1.269783 |
| C  | -4.603938 | -0.974698 | -2.656445 |
| C  | -6.513852 | -3.028147 | -2.420177 |
| H  | -6.119829 | -2.959037 | -0.281412 |
| C  | -5.245979 | -1.471036 | -3.802559 |
| H  | -3.862873 | -0.162189 | -2.740569 |
| C  | -6.201619 | -2.496775 | -3.684702 |
| H  | -7.267238 | -3.825856 | -2.327078 |

|    |           |           |           |
|----|-----------|-----------|-----------|
| H  | -5.006170 | -1.048420 | -4.790658 |
| H  | -6.711281 | -2.879410 | -4.582790 |
| C  | -4.994038 | -1.232685 | 1.547550  |
| C  | -4.961343 | -2.494051 | 2.182992  |
| C  | -5.844429 | -0.215998 | 2.034565  |
| C  | -5.786631 | -2.735533 | 3.293934  |
| H  | -4.285368 | -3.281117 | 1.812027  |
| C  | -6.669060 | -0.466611 | 3.143576  |
| H  | -5.851086 | 0.771677  | 1.544479  |
| C  | -6.641270 | -1.725094 | 3.771948  |
| H  | -5.761009 | -3.718142 | 3.790493  |
| H  | -7.331969 | 0.326504  | 3.522941  |
| H  | -7.285324 | -1.917929 | 4.644187  |
| C  | -2.488386 | -1.959230 | 0.205678  |
| C  | -2.112152 | -2.864588 | -0.806661 |
| C  | -1.635151 | -1.754725 | 1.316909  |
| C  | -0.889484 | -3.555006 | -0.707713 |
| H  | -2.767328 | -3.026935 | -1.676708 |
| C  | -0.421146 | -2.448462 | 1.412666  |
| H  | -1.922914 | -1.040959 | 2.106672  |
| C  | -0.043860 | -3.346215 | 0.394192  |
| H  | -0.593310 | -4.255489 | -1.503890 |
| H  | 0.245198  | -2.280307 | 2.272199  |
| H  | 0.916887  | -3.879176 | 0.459656  |
| Au | -3.021455 | 1.220681  | -0.116876 |
| H  | -0.658044 | 5.330276  | 1.894109  |
| N  | 0.343547  | 6.518868  | -0.328554 |
| C  | 0.870522  | 7.080060  | 0.916074  |
| H  | 1.547292  | 7.920118  | 0.679023  |
| H  | 0.058846  | 7.470222  | 1.566833  |
| H  | 1.446144  | 6.315866  | 1.482983  |
| C  | 0.810123  | 7.061418  | -1.603126 |
| H  | -0.038819 | 7.330508  | -2.265997 |
| H  | 1.395766  | 7.979341  | -1.417739 |
| H  | 1.459296  | 6.332221  | -2.137441 |
| C  | 4.509700  | 5.004702  | 0.885651  |
| H  | 5.294888  | 4.491582  | 1.480381  |
| H  | 4.980483  | 5.392551  | -0.039582 |
| H  | 4.179317  | 5.879549  | 1.487213  |

**[(PPh<sub>3</sub>)Au(*para*-aniline-alkene)] Markovnikov**  
-1885.83233447 A.U.

|   |           |           |           |
|---|-----------|-----------|-----------|
| P | 2.516617  | -0.396880 | -0.022716 |
| H | -1.985801 | -2.662738 | 0.306215  |
| C | -1.714727 | -1.655232 | -0.079572 |
| C | -2.506677 | -0.554340 | 0.680002  |
| C | -2.078438 | 1.474892  | -0.829646 |
| C | -1.886324 | 0.817503  | 0.403407  |
| C | -1.373657 | 2.651260  | -1.136898 |
| C | -1.006533 | 1.411278  | 1.332735  |
| C | -0.453670 | 3.216418  | -0.224762 |
| H | -1.528737 | 3.136042  | -2.115984 |
| C | -0.299082 | 2.583020  | 1.026128  |
| H | -0.839121 | 0.915570  | 2.303096  |
| H | 0.407487  | 2.997298  | 1.763486  |
| C | 2.855739  | 0.535707  | -1.572946 |
| C | 4.119142  | 0.570484  | -2.198798 |
| C | 1.783769  | 1.286163  | -2.107218 |
| C | 4.308915  | 1.361653  | -3.346416 |
| H | 4.955067  | -0.019097 | -1.790164 |
| C | 1.984776  | 2.084664  | -3.243511 |
| H | 0.792755  | 1.253015  | -1.625021 |
| C | 3.246796  | 2.123570  | -3.865672 |
| H | 5.295653  | 1.383983  | -3.835810 |
| H | 1.145172  | 2.674582  | -3.644015 |
| H | 3.401889  | 2.745154  | -4.761893 |
| C | 3.968079  | -1.499545 | 0.207508  |
| C | 5.162811  | -1.064288 | 0.821643  |
| C | 3.868767  | -2.823357 | -0.274584 |
| C | 6.250546  | -1.946006 | 0.942262  |
| H | 5.237499  | -0.035700 | 1.209564  |
| C | 4.961530  | -3.698192 | -0.157101 |
| H | 2.924532  | -3.163210 | -0.732043 |
| C | 6.152487  | -3.260643 | 0.450827  |

|    |            |           |           |
|----|------------|-----------|-----------|
| H  | 7.180114   | -1.604634 | 1.424933  |
| H  | 4.878934   | -4.730082 | -0.533280 |
| H  | 7.006127   | -3.949972 | 0.549197  |
| C  | 2.693037   | 0.891600  | 1.286157  |
| C  | 3.234939   | 2.168145  | 1.029479  |
| C  | 2.209373   | 0.584468  | 2.577365  |
| C  | 3.295129   | 3.126036  | 2.057188  |
| H  | 3.593642   | 2.421603  | 0.019743  |
| C  | 2.277227   | 1.541431  | 3.601624  |
| H  | 1.755085   | -0.401991 | 2.767237  |
| C  | 2.817911   | 2.815406  | 3.342543  |
| H  | 3.709384   | 4.124807  | 1.847351  |
| H  | 1.891284   | 1.298023  | 4.604045  |
| H  | 2.857851   | 3.570390  | 4.143565  |
| Au | 0.347611   | -1.282417 | -0.014998 |
| H  | -1.995955  | -1.636345 | -1.158681 |
| H  | -2.364443  | -0.744560 | 1.769102  |
| H  | -2.781674  | 1.044617  | -1.561004 |
| C  | -6.205229  | 0.531974  | 0.777656  |
| C  | -6.880118  | -0.479091 | 0.031882  |
| C  | -4.819269  | 0.483726  | 0.963098  |
| C  | -6.077191  | -1.519537 | -0.512685 |
| C  | -4.019208  | -0.550515 | 0.426572  |
| H  | -4.334573  | 1.290748  | 1.537792  |
| C  | -4.687583  | -1.545187 | -0.312458 |
| H  | -6.533258  | -2.326030 | -1.103459 |
| H  | -4.113666  | -2.374485 | -0.752594 |
| H  | -6.764370  | 1.369729  | 1.217020  |
| N  | -8.259585  | -0.446120 | -0.154893 |
| C  | -9.028200  | 0.682018  | 0.334399  |
| H  | -10.098988 | 0.527931  | 0.101623  |
| H  | -8.940951  | 0.798302  | 1.439474  |
| H  | -8.715171  | 1.650090  | -0.127080 |
| C  | -8.896461  | -1.448339 | -0.987098 |
| H  | -8.734022  | -2.478767 | -0.594345 |
| H  | -9.988424  | -1.270615 | -1.010273 |
| H  | -8.525680  | -1.433594 | -2.040949 |
| C  | 0.394656   | 4.411150  | -0.595643 |
| H  | -0.081237  | 5.031945  | -1.382300 |
| H  | 0.599874   | 5.059003  | 0.281359  |
| H  | 1.380713   | 4.076244  | -0.990879 |

**[(PPh<sub>3</sub>)Au(*ortho*-aniline)+(PPh<sub>3</sub>)Au(alkene)]<sup>+</sup> adduct**

-3057.36619731 A.U.

|   |           |           |           |
|---|-----------|-----------|-----------|
| P | 3.621505  | -1.272460 | -0.034759 |
| H | -1.000983 | 0.165724  | -1.463752 |
| C | -0.134630 | 0.845873  | -1.457218 |
| C | 0.208186  | 1.458335  | -0.238547 |
| C | 1.808145  | 3.248607  | -1.057407 |
| C | 1.133009  | 2.569887  | -0.010557 |
| C | 2.726874  | 4.259904  | -0.773122 |
| C | 1.416634  | 2.947624  | 1.325074  |
| C | 3.021974  | 4.632385  | 0.563207  |
| H | 3.241824  | 4.772276  | -1.601452 |
| C | 2.351977  | 3.953205  | 1.603277  |
| H | 0.889594  | 2.439721  | 2.146968  |
| H | 2.557255  | 4.228255  | 2.650157  |
| C | 4.995171  | -0.078606 | -0.330371 |
| C | 6.267257  | -0.482787 | -0.790415 |
| C | 4.742983  | 1.294295  | -0.095720 |
| C | 7.280267  | 0.472985  | -0.982438 |
| H | 6.474070  | -1.538215 | -1.019568 |
| C | 5.763317  | 2.239227  | -0.279644 |
| H | 3.744157  | 1.644522  | 0.208346  |
| C | 7.035449  | 1.831459  | -0.718744 |
| H | 8.267840  | 0.148967  | -1.345851 |
| H | 5.548325  | 3.302121  | -0.091827 |
| H | 7.833308  | 2.575076  | -0.869904 |
| C | 4.095948  | -2.892310 | -0.727213 |
| C | 5.210957  | -3.613472 | -0.234227 |
| C | 3.324696  | -3.432506 | -1.780278 |
| C | 5.539904  | -4.860208 | -0.790439 |
| H | 5.820681  | -3.206216 | 0.587768  |
| C | 3.660661  | -4.679674 | -2.332108 |



---

|    |           |           |           |
|----|-----------|-----------|-----------|
| H  | 2.455213  | -2.872956 | -2.161513 |
| C  | 4.765580  | -5.394288 | -1.836964 |
| H  | 6.406418  | -5.418351 | -0.403322 |
| H  | 3.056394  | -5.094463 | -3.153671 |
| H  | 5.026781  | -6.372819 | -2.269041 |
| C  | 3.452338  | -1.460682 | 1.795566  |
| C  | 3.075193  | -0.312266 | 2.531082  |
| C  | 3.545211  | -2.705762 | 2.451417  |
| C  | 2.812284  | -0.409710 | 3.905374  |
| H  | 2.959443  | 0.661097  | 2.028505  |
| C  | 3.273529  | -2.797106 | 3.828849  |
| H  | 3.809784  | -3.616069 | 1.894005  |
| C  | 2.908593  | -1.653085 | 4.558252  |
| H  | 2.520433  | 0.490456  | 4.468458  |
| H  | 3.344940  | -3.774217 | 4.331269  |
| H  | 2.693835  | -1.730000 | 5.635344  |
| Au | 1.617818  | -0.352130 | -0.770492 |
| H  | 0.140283  | 1.293826  | -2.426203 |
| H  | -0.316463 | 1.092557  | 0.662189  |
| H  | 1.622276  | 2.966106  | -2.104506 |
| P  | -3.505562 | -1.150149 | 0.163106  |
| C  | -1.198462 | 4.903366  | -0.484405 |
| C  | -1.983159 | 3.725715  | -0.572187 |
| C  | -0.796207 | 5.412062  | 0.759518  |
| C  | -2.350929 | 3.029510  | 0.627624  |
| C  | -1.185984 | 4.765915  | 1.944353  |
| H  | -0.184596 | 6.327207  | 0.799298  |
| C  | -1.956377 | 3.590559  | 1.864674  |
| H  | -0.885626 | 5.169144  | 2.924531  |
| H  | -2.237496 | 3.077133  | 2.799101  |
| C  | -1.882233 | -2.022617 | 0.282150  |
| C  | -1.394833 | -2.870260 | -0.734173 |
| C  | -1.104399 | -1.802929 | 1.443428  |
| C  | -0.148175 | -3.504704 | -0.579545 |
| H  | -1.989802 | -3.037394 | -1.645702 |
| C  | 0.132720  | -2.446898 | 1.598872  |
| H  | -1.474868 | -1.122579 | 2.228252  |
| C  | 0.609769  | -3.302324 | 0.586570  |
| H  | 0.230048  | -4.168453 | -1.372690 |
| H  | 0.736389  | -2.273947 | 2.502827  |
| H  | 1.581772  | -3.804561 | 0.702453  |
| C  | -4.074585 | -1.485332 | -1.553442 |
| C  | -4.855427 | -2.615412 | -1.877219 |
| C  | -3.674234 | -0.592433 | -2.574735 |
| C  | -5.221745 | -2.854594 | -3.213281 |
| H  | -5.184862 | -3.306012 | -1.084915 |
| C  | -4.037784 | -0.842028 | -3.907966 |
| H  | -3.091403 | 0.308991  | -2.320001 |
| C  | -4.811008 | -1.973052 | -4.229140 |
| H  | -5.836569 | -3.734137 | -3.460552 |
| H  | -3.726838 | -0.141668 | -4.699119 |
| H  | -5.103426 | -2.162320 | -5.273850 |
| C  | -4.626768 | -2.082022 | 1.270682  |
| C  | -4.419196 | -3.444473 | 1.580398  |
| C  | -5.746797 | -1.400135 | 1.796057  |
| C  | -5.336666 | -4.119645 | 2.403087  |
| H  | -3.539033 | -3.975095 | 1.183050  |
| C  | -6.661844 | -2.083432 | 2.613573  |
| H  | -5.893354 | -0.331370 | 1.567437  |
| C  | -6.457860 | -3.442092 | 2.916310  |
| H  | -5.174412 | -5.181446 | 2.646230  |
| H  | -7.534015 | -1.550041 | 3.022413  |
| H  | -7.173499 | -3.974857 | 3.561898  |
| Au | -3.115024 | 1.121312  | 0.532616  |
| H  | -0.904942 | 5.446327  | -1.394044 |
| N  | -2.377031 | 3.203681  | -1.841139 |
| C  | -1.653267 | 3.674230  | -3.013891 |
| H  | -1.870413 | 3.000494  | -3.869283 |
| H  | -1.933534 | 4.711842  | -3.330835 |
| H  | -0.561866 | 3.656779  | -2.827694 |
| C  | -3.821777 | 3.144993  | -2.096550 |
| H  | -4.360248 | 2.796658  | -1.195399 |
| H  | -4.229102 | 4.147048  | -2.383496 |
| H  | -4.037961 | 2.434254  | -2.921593 |

---

|   |          |          |          |
|---|----------|----------|----------|
| C | 3.996478 | 5.743861 | 0.864308 |
| H | 4.709692 | 5.908753 | 0.031724 |
| H | 3.454636 | 6.702517 | 1.022624 |
| H | 4.574753 | 5.544338 | 1.789301 |

**[(PPh<sub>3</sub>)Au(*ortho*-aniline)--(PPh<sub>3</sub>)Au(alkene)]<sup>+</sup> TS Markovnikov**

-3057.34910658 A.U.

|    |           |           |           |
|----|-----------|-----------|-----------|
| P  | 3.638292  | -1.356934 | -0.107095 |
| H  | -0.846482 | 0.316429  | -1.495119 |
| C  | 0.038008  | 0.948574  | -1.284112 |
| C  | -0.069849 | 1.681313  | -0.006062 |
| C  | 1.724349  | 3.417526  | -0.511836 |
| C  | 1.042401  | 2.590524  | 0.405709  |
| C  | 2.810378  | 4.205957  | -0.102647 |
| C  | 1.477377  | 2.596319  | 1.751007  |
| C  | 3.261397  | 4.195309  | 1.235516  |
| H  | 3.328781  | 4.837951  | -0.841913 |
| C  | 2.571230  | 3.372568  | 2.155245  |
| H  | 0.958972  | 1.955840  | 2.483268  |
| H  | 2.900702  | 3.342707  | 3.206914  |
| C  | 5.080125  | -0.219413 | -0.284055 |
| C  | 6.395543  | -0.671301 | -0.524086 |
| C  | 4.830433  | 1.169169  | -0.169467 |
| C  | 7.449042  | 0.253741  | -0.624895 |
| H  | 6.606473  | -1.743113 | -0.652385 |
| C  | 5.890002  | 2.085170  | -0.260435 |
| H  | 3.803952  | 1.546479  | -0.029408 |
| C  | 7.201347  | 1.630649  | -0.485568 |
| H  | 8.471151  | -0.107399 | -0.818596 |
| H  | 5.677684  | 3.161152  | -0.169502 |
| H  | 8.030498  | 2.350848  | -0.566462 |
| C  | 4.081207  | -2.978396 | -0.828937 |
| C  | 5.100609  | -3.799840 | -0.289958 |
| C  | 3.363325  | -3.414244 | -1.965267 |
| C  | 5.396612  | -5.035397 | -0.888422 |
| H  | 5.655840  | -3.481436 | 0.606528  |
| C  | 3.665549  | -4.650765 | -2.560160 |
| H  | 2.563179  | -2.776788 | -2.376250 |
| C  | 4.681544  | -5.460752 | -2.023340 |
| H  | 6.189824  | -5.671023 | -0.464892 |
| H  | 3.104410  | -4.982921 | -3.447444 |
| H  | 4.917234  | -6.430329 | -2.489258 |
| C  | 3.431516  | -1.618090 | 1.710931  |
| C  | 3.234441  | -0.464749 | 2.505822  |
| C  | 3.300898  | -2.894156 | 2.298711  |
| C  | 2.915934  | -0.589820 | 3.866214  |
| H  | 3.309410  | 0.538520  | 2.057878  |
| C  | 2.982038  | -3.012694 | 3.664189  |
| H  | 3.432765  | -3.805442 | 1.696413  |
| C  | 2.786540  | -1.864427 | 4.450083  |
| H  | 2.764892  | 0.316345  | 4.474011  |
| H  | 2.882567  | -4.013547 | 4.112541  |
| H  | 2.534494  | -1.961775 | 5.517540  |
| Au | 1.699601  | -0.303407 | -0.864772 |
| H  | 0.280132  | 1.580022  | -2.162601 |
| H  | -0.396032 | 1.041975  | 0.832173  |
| H  | 1.409815  | 3.430234  | -1.565904 |
| P  | -3.778391 | -1.020368 | 0.212498  |
| C  | -1.152026 | 5.125212  | -0.811111 |
| C  | -1.528579 | 3.775102  | -1.095469 |
| C  | -1.064492 | 5.597605  | 0.495138  |
| C  | -1.742761 | 2.858664  | 0.026710  |
| C  | -1.333493 | 4.755176  | 1.602075  |
| H  | -0.788800 | 6.651146  | 0.662302  |
| C  | -1.662553 | 3.433220  | 1.354066  |
| H  | -1.264255 | 5.140374  | 2.630166  |
| H  | -1.807623 | 2.756338  | 2.212777  |
| C  | -2.192652 | -1.965988 | 0.271223  |
| C  | -1.777783 | -2.815773 | -0.773461 |
| C  | -1.326218 | -1.720576 | 1.363912  |
| C  | -0.505139 | -3.414987 | -0.722220 |
| H  | -2.443191 | -3.009567 | -1.629060 |
| C  | -0.063422 | -2.326895 | 1.413404  |
| H  | -1.645016 | -1.049286 | 2.178761  |

---

|    |           |           |           |
|----|-----------|-----------|-----------|
| C  | 0.349008  | -3.173488 | 0.365557  |
| H  | -0.178583 | -4.074016 | -1.541678 |
| H  | 0.612223  | -2.129784 | 2.259579  |
| H  | 1.344225  | -3.641421 | 0.396037  |
| C  | -4.708230 | -1.684368 | -1.220934 |
| C  | -5.700811 | -2.676319 | -1.074008 |
| C  | -4.384333 | -1.197588 | -2.507899 |
| C  | -6.360674 | -3.176447 | -2.209939 |
| H  | -5.963714 | -3.054326 | -0.073769 |
| C  | -5.039510 | -1.709669 | -3.638730 |
| H  | -3.614548 | -0.417154 | -2.619747 |
| C  | -6.030170 | -2.698055 | -3.490164 |
| H  | -7.140085 | -3.945257 | -2.091903 |
| H  | -4.782882 | -1.329519 | -4.639832 |
| H  | -6.551109 | -3.092452 | -4.376514 |
| C  | -4.697395 | -1.486138 | 1.721941  |
| C  | -4.564832 | -2.771203 | 2.294329  |
| C  | -5.575761 | -0.541118 | 2.295926  |
| C  | -5.318103 | -3.107048 | 3.431305  |
| H  | -3.868900 | -3.503200 | 1.854100  |
| C  | -6.328262 | -0.886494 | 3.430650  |
| H  | -5.660762 | 0.465497  | 1.854016  |
| C  | -6.200163 | -2.167724 | 3.997133  |
| H  | -5.214582 | -4.107537 | 3.879613  |
| H  | -7.012627 | -0.149419 | 3.878579  |
| H  | -6.787213 | -2.434672 | 4.889826  |
| Au | -3.025477 | 1.166450  | 0.057297  |
| H  | -0.962751 | 5.831912  | -1.629497 |
| N  | -1.568712 | 3.367081  | -2.414567 |
| C  | -1.005198 | 4.212191  | -3.466518 |
| H  | -0.823404 | 3.587835  | -4.363160 |
| H  | -1.687897 | 5.043114  | -3.760886 |
| H  | -0.034229 | 4.643509  | -3.155109 |
| C  | -2.449295 | 2.328651  | -2.939588 |
| H  | -2.983567 | 1.819694  | -2.110337 |
| H  | -3.207653 | 2.779158  | -3.619729 |
| H  | -1.878650 | 1.561038  | -3.502301 |
| C  | 4.441379  | 5.025505  | 1.683275  |
| H  | 4.898406  | 5.583502  | 0.841996  |
| H  | 4.141687  | 5.765793  | 2.455634  |
| H  | 5.228741  | 4.388186  | 2.139378  |

**[(PPh<sub>3</sub>)Au(*ortho*-aniline-alkene)Au(PPh<sub>3</sub>)]<sup>+</sup> Intermediate Markovnikov**  
-3057.37875780 A.U.

|   |           |           |           |
|---|-----------|-----------|-----------|
| P | 3.824913  | -1.181945 | -0.011539 |
| H | -0.768542 | -0.046038 | -1.559393 |
| C | 0.089461  | 0.659642  | -1.451853 |
| C | -0.241465 | 1.754654  | -0.406766 |
| C | 1.208472  | 3.711780  | -1.188359 |
| C | 0.933521  | 2.718923  | -0.229222 |
| C | 2.354200  | 4.519919  | -1.082941 |
| C | 1.829085  | 2.573993  | 0.852379  |
| C | 3.253997  | 4.377230  | -0.005110 |
| H | 2.554531  | 5.278270  | -1.857689 |
| C | 2.961708  | 3.392561  | 0.965330  |
| H | 1.662981  | 1.776121  | 1.596285  |
| H | 3.644836  | 3.257045  | 1.819818  |
| C | 5.232346  | -0.146640 | -0.595614 |
| C | 6.565421  | -0.610309 | -0.608209 |
| C | 4.947552  | 1.180762  | -0.993275 |
| C | 7.602456  | 0.250207  | -1.005768 |
| H | 6.798382  | -1.646775 | -0.319664 |
| C | 5.991363  | 2.038547  | -1.378332 |
| H | 3.907473  | 1.545993  | -0.998982 |
| C | 7.318889  | 1.575271  | -1.385189 |
| H | 8.640171  | -0.118179 | -1.020447 |
| H | 5.756653  | 3.070294  | -1.682638 |
| H | 8.136248  | 2.245147  | -1.695355 |
| C | 4.256220  | -2.941018 | -0.299093 |
| C | 5.190476  | -3.638513 | 0.501167  |
| C | 3.619444  | -3.606742 | -1.370833 |
| C | 5.488973  | -4.982411 | 0.221642  |
| H | 5.673252  | -3.135055 | 1.354053  |
| C | 3.923837  | -4.950469 | -1.646553 |

---

|    |           |           |           |
|----|-----------|-----------|-----------|
| H  | 2.879676  | -3.063157 | -1.982113 |
| C  | 4.858702  | -5.638184 | -0.852189 |
| H  | 6.217244  | -5.521958 | 0.847203  |
| H  | 3.427489  | -5.463442 | -2.485193 |
| H  | 5.095189  | -6.691998 | -1.067581 |
| C  | 3.829727  | -0.966542 | 1.821436  |
| C  | 4.217982  | 0.271187  | 2.378609  |
| C  | 3.309540  | -1.973024 | 2.666622  |
| C  | 4.075063  | 0.501873  | 3.757122  |
| H  | 4.632822  | 1.057443  | 1.729511  |
| C  | 3.172897  | -1.738957 | 4.045370  |
| H  | 3.020989  | -2.951139 | 2.250426  |
| C  | 3.549106  | -0.498986 | 4.593604  |
| H  | 4.386305  | 1.469488  | 4.181753  |
| H  | 2.775822  | -2.534250 | 4.695887  |
| H  | 3.444190  | -0.318209 | 5.674798  |
| Au | 1.798039  | -0.386052 | -0.855110 |
| H  | 0.278673  | 1.112483  | -2.450702 |
| H  | -0.366382 | 1.231199  | 0.559128  |
| H  | 0.525319  | 3.848249  | -2.042939 |
| P  | -3.785583 | -1.148928 | 0.105702  |
| C  | -2.803862 | 4.653391  | -0.244162 |
| C  | -3.268850 | 4.673666  | -1.566459 |
| C  | -1.968004 | 3.613323  | 0.246326  |
| C  | -2.925713 | 3.654435  | -2.467540 |
| C  | -1.535863 | 2.570086  | -0.685733 |
| H  | -3.928632 | 5.495117  | -1.887533 |
| C  | -2.059445 | 2.632429  | -2.030773 |
| H  | -3.292181 | 3.661245  | -3.504163 |
| H  | -1.653101 | 1.920161  | -2.766374 |
| C  | -4.739032 | -2.126219 | -1.109967 |
| C  | -5.549091 | -3.206304 | -0.696769 |
| C  | -4.610362 | -1.819679 | -2.483130 |
| C  | -6.223301 | -3.975759 | -1.659259 |
| H  | -5.660895 | -3.441660 | 0.373263  |
| C  | -5.281664 | -2.599612 | -3.438740 |
| H  | -3.986347 | -0.967593 | -2.800500 |
| C  | -6.088427 | -3.675967 | -3.027223 |
| H  | -6.860650 | -4.813919 | -1.337494 |
| H  | -5.181215 | -2.359582 | -4.508511 |
| H  | -6.621246 | -4.281111 | -3.777172 |
| C  | -4.671536 | -1.206111 | 1.701252  |
| C  | -4.476920 | -2.276646 | 2.602740  |
| C  | -5.592000 | -0.178971 | 2.005548  |
| C  | -5.210730 | -2.317790 | 3.800107  |
| H  | -3.747125 | -3.068932 | 2.371603  |
| C  | -6.322886 | -0.230180 | 3.203229  |
| H  | -5.730492 | 0.660573  | 1.304219  |
| C  | -6.133176 | -1.298453 | 4.099263  |
| H  | -5.059333 | -3.150631 | 4.504304  |
| H  | -7.040968 | 0.569956  | 3.440585  |
| H  | -6.704769 | -1.334460 | 5.039780  |
| C  | -2.178535 | -2.010476 | 0.347080  |
| C  | -1.728718 | -2.991163 | -0.560286 |
| C  | -1.327006 | -1.564839 | 1.386051  |
| C  | -0.432373 | -3.520666 | -0.426694 |
| H  | -2.384190 | -3.338058 | -1.374329 |
| C  | -0.037285 | -2.097284 | 1.511910  |
| H  | -1.673198 | -0.794543 | 2.093955  |
| C  | 0.413273  | -3.072637 | 0.600431  |
| H  | -0.076922 | -4.279653 | -1.140340 |
| H  | 0.633182  | -1.736675 | 2.307003  |
| H  | 1.434860  | -3.474252 | 0.679053  |
| Au | -3.128942 | 0.943622  | -0.568305 |
| H  | -3.121608 | 5.455309  | 0.436420  |
| N  | -1.526031 | 3.629707  | 1.556478  |
| C  | -1.442678 | 2.419647  | 2.365700  |
| H  | -1.911582 | 2.609226  | 3.355240  |
| H  | -2.009773 | 1.594311  | 1.886551  |
| H  | -0.397387 | 2.082902  | 2.538580  |
| C  | -1.512141 | 4.877014  | 2.312680  |
| H  | -2.495696 | 5.115638  | 2.784044  |
| H  | -0.755432 | 4.796491  | 3.118658  |
| H  | -1.211071 | 5.720847  | 1.662373  |

---

|   |          |          |           |
|---|----------|----------|-----------|
| C | 4.484726 | 5.244985 | 0.125531  |
| H | 4.711841 | 5.783507 | -0.816173 |
| H | 4.354820 | 6.009976 | 0.921991  |
| H | 5.375174 | 4.641535 | 0.400327  |

**[(PPh<sub>3</sub>)Au(*ortho*-aniline-alkene)] Markovnikov**

-1885.82982587 A.U.

|    |           |           |           |
|----|-----------|-----------|-----------|
| P  | 2.256574  | -0.285620 | 0.055599  |
| H  | -1.940807 | -3.095020 | 0.189856  |
| C  | -1.758021 | -2.087871 | -0.245492 |
| C  | -2.744990 | -1.048765 | 0.354556  |
| C  | -2.481911 | 0.892290  | -1.301702 |
| C  | -2.289427 | 0.371347  | -0.006187 |
| C  | -1.927166 | 2.130194  | -1.671219 |
| C  | -1.540477 | 1.144037  | 0.906759  |
| C  | -1.152304 | 2.889112  | -0.765766 |
| H  | -2.085400 | 2.510377  | -2.695134 |
| C  | -0.982301 | 2.375692  | 0.538423  |
| H  | -1.369278 | 0.754993  | 1.923630  |
| H  | -0.380063 | 2.937368  | 1.271013  |
| C  | 2.592157  | 0.564978  | -1.542294 |
| C  | 3.887255  | 0.728908  | -2.076275 |
| C  | 1.477969  | 1.117426  | -2.214446 |
| C  | 4.065087  | 1.450496  | -3.270696 |
| H  | 4.757633  | 0.294881  | -1.559064 |
| C  | 1.665094  | 1.848065  | -3.397797 |
| H  | 0.462764  | 0.984257  | -1.805559 |
| C  | 2.957911  | 2.015491  | -3.928734 |
| H  | 5.077407  | 1.573509  | -3.687476 |
| H  | 0.790201  | 2.282714  | -3.906729 |
| H  | 3.102703  | 2.583570  | -4.861439 |
| C  | 3.818142  | -1.157017 | 0.476917  |
| C  | 4.893688  | -0.515762 | 1.129586  |
| C  | 3.933293  | -2.513366 | 0.100352  |
| C  | 6.077486  | -1.226110 | 1.392493  |
| H  | 4.800673  | 0.538871  | 1.434902  |
| C  | 5.121478  | -3.216259 | 0.359868  |
| H  | 3.080296  | -3.013326 | -0.388352 |
| C  | 6.193706  | -2.573726 | 1.005446  |
| H  | 6.913890  | -0.724399 | 1.904659  |
| H  | 5.206867  | -4.273993 | 0.064896  |
| H  | 7.122262  | -3.128179 | 1.214979  |
| C  | 2.152636  | 1.111008  | 1.256245  |
| C  | 2.561480  | 2.421941  | 0.934721  |
| C  | 1.589486  | 0.846687  | 2.524321  |
| C  | 2.410050  | 3.456422  | 1.875061  |
| H  | 2.982243  | 2.640241  | -0.059120 |
| C  | 1.442956  | 1.881510  | 3.460979  |
| H  | 1.241888  | -0.172066 | 2.762485  |
| C  | 1.850390  | 3.189554  | 3.136773  |
| H  | 2.723052  | 4.479787  | 1.614309  |
| H  | 0.995467  | 1.669497  | 4.444804  |
| H  | 1.723610  | 4.003729  | 3.867735  |
| Au | 0.226341  | -1.448898 | -0.029368 |
| H  | -1.925906 | -2.170749 | -1.344471 |
| H  | -2.651630 | -1.130958 | 1.460519  |
| H  | -3.074664 | 0.313453  | -2.028681 |
| C  | -6.520549 | -0.403978 | -0.134666 |
| C  | -6.906794 | -1.498387 | -0.925513 |
| C  | -5.197244 | -0.284260 | 0.347525  |
| C  | -5.969543 | -2.495886 | -1.233311 |
| C  | -4.219361 | -1.264595 | -0.016089 |
| H  | -7.945448 | -1.576031 | -1.285870 |
| C  | -4.642649 | -2.367424 | -0.782174 |
| H  | -6.260576 | -3.366977 | -1.841715 |
| H  | -3.906393 | -3.134231 | -1.064119 |
| H  | -7.261175 | 0.365675  | 0.132453  |
| N  | -4.802224 | 0.829626  | 1.130006  |
| C  | -4.500398 | 0.616852  | 2.533061  |
| H  | -5.408775 | 0.700924  | 3.185409  |
| H  | -4.072975 | -0.391915 | 2.691143  |
| H  | -3.753461 | 1.363927  | 2.884853  |
| C  | -5.363713 | 2.129541  | 0.830060  |
| H  | -6.370993 | 2.315957  | 1.289319  |

---

|   |           |          |           |
|---|-----------|----------|-----------|
| H | -4.675260 | 2.917117 | 1.208579  |
| H | -5.448475 | 2.255942 | -0.267654 |
| C | -0.457522 | 4.161981 | -1.192385 |
| H | -0.976162 | 4.655108 | -2.040303 |
| H | -0.385748 | 4.891425 | -0.359294 |
| H | 0.582877  | 3.943613 | -1.524950 |

**[(PPh<sub>3</sub>)Au(*para*-aniline-alkene)Au(PPh<sub>3</sub>)]<sup>+</sup> Intermediate anti-Markovnikov**

-3057.38948798 A.U.

|    |           |           |           |
|----|-----------|-----------|-----------|
| P  | 4.382921  | -0.062083 | -0.402330 |
| H  | -0.294973 | -0.428371 | -0.299717 |
| C  | 0.173629  | -1.414963 | -0.062129 |
| C  | -0.427700 | -2.440704 | -1.050171 |
| C  | -0.341135 | -0.599082 | 2.277890  |
| C  | -0.046481 | -1.674150 | 1.405223  |
| C  | -0.561955 | -0.801732 | 3.649420  |
| C  | 0.041799  | -2.963523 | 1.985869  |
| C  | -0.499168 | -2.090616 | 4.220829  |
| H  | -0.796885 | 0.065409  | 4.290156  |
| C  | -0.184757 | -3.164828 | 3.355841  |
| H  | 0.291751  | -3.829034 | 1.351219  |
| H  | -0.112730 | -4.185100 | 3.769006  |
| C  | 5.696468  | -1.256365 | 0.065095  |
| C  | 6.824318  | -0.878935 | 0.826035  |
| C  | 5.563704  | -2.589163 | -0.384796 |
| C  | 7.815865  | -1.829722 | 1.123785  |
| H  | 6.925125  | 0.155303  | 1.191712  |
| C  | 6.561080  | -3.531658 | -0.088282 |
| H  | 4.671392  | -2.885272 | -0.961060 |
| C  | 7.687281  | -3.153031 | 0.665622  |
| H  | 8.693447  | -1.534259 | 1.719980  |
| H  | 6.454749  | -4.569724 | -0.440038 |
| H  | 8.465248  | -3.895347 | 0.903376  |
| C  | 4.569064  | 1.325924  | 0.793874  |
| C  | 5.150142  | 2.564643  | 0.451589  |
| C  | 4.087076  | 1.115769  | 2.107056  |
| C  | 5.258023  | 3.580064  | 1.420725  |
| H  | 5.518842  | 2.740285  | -0.570993 |
| C  | 4.207330  | 2.128048  | 3.071225  |
| H  | 3.609460  | 0.157482  | 2.369864  |
| C  | 4.793229  | 3.362393  | 2.730084  |
| H  | 5.711162  | 4.546184  | 1.148611  |
| H  | 3.833988  | 1.955277  | 4.092624  |
| H  | 4.883203  | 4.158288  | 3.485903  |
| C  | 4.901714  | 0.617410  | -2.028708 |
| C  | 6.265294  | 0.781000  | -2.359567 |
| C  | 3.905736  | 1.007483  | -2.951263 |
| C  | 6.623949  | 1.347938  | -3.593828 |
| H  | 7.047022  | 0.457456  | -1.653904 |
| C  | 4.270374  | 1.576647  | -4.183082 |
| H  | 2.843540  | 0.842119  | -2.704969 |
| C  | 5.628637  | 1.750229  | -4.503538 |
| H  | 7.688029  | 1.471444  | -3.849221 |
| H  | 3.490513  | 1.876310  | -4.900630 |
| H  | 5.914184  | 2.191117  | -5.471473 |
| Au | 2.196699  | -0.891938 | -0.315838 |
| H  | -0.045235 | -3.463799 | -0.843929 |
| H  | -0.073248 | -2.196773 | -2.072459 |
| H  | -0.378986 | 0.421073  | 1.866690  |
| P  | -2.882790 | 1.814027  | 0.059176  |
| C  | -3.982774 | -2.844812 | -2.526055 |
| C  | -4.736792 | -3.362841 | -1.424417 |
| C  | -2.656178 | -2.437119 | -2.363738 |
| C  | -4.078492 | -3.417815 | -0.152527 |
| C  | -1.964686 | -2.504581 | -1.100599 |
| H  | -2.095930 | -2.092619 | -3.248431 |
| C  | -2.752362 | -3.008662 | 0.000440  |
| H  | -4.606862 | -3.792657 | 0.733329  |
| H  | -2.272021 | -3.111373 | 0.985387  |
| C  | -3.802027 | 1.999297  | 1.631870  |
| C  | -4.631011 | 3.113681  | 1.880159  |
| C  | -3.614450 | 1.014935  | 2.629215  |
| C  | -5.265837 | 3.241530  | 3.128263  |
| H  | -4.783870 | 3.878607  | 1.102583  |

---

|    |           |           |           |
|----|-----------|-----------|-----------|
| C  | -4.243820 | 1.157738  | 3.875139  |
| H  | -2.963879 | 0.145663  | 2.436202  |
| C  | -5.071110 | 2.268901  | 4.125196  |
| H  | -5.916721 | 4.108474  | 3.321214  |
| H  | -4.088665 | 0.392824  | 4.651929  |
| H  | -5.570152 | 2.375338  | 5.101109  |
| C  | -3.644385 | 2.942438  | -1.159495 |
| C  | -3.231227 | 4.290085  | -1.248250 |
| C  | -4.684702 | 2.461929  | -1.984605 |
| C  | -3.867382 | 5.152747  | -2.156696 |
| H  | -2.410523 | 4.660180  | -0.613158 |
| C  | -5.317500 | 3.332122  | -2.886577 |
| H  | -4.987446 | 1.403459  | -1.921789 |
| C  | -4.909833 | 4.676315  | -2.972352 |
| H  | -3.544427 | 6.202902  | -2.229797 |
| H  | -6.127873 | 2.958155  | -3.531381 |
| H  | -5.403457 | 5.355445  | -3.684929 |
| C  | -1.187737 | 2.442627  | 0.384652  |
| C  | -0.843058 | 3.038433  | 1.616809  |
| C  | -0.192293 | 2.219570  | -0.594911 |
| C  | 0.494471  | 3.393999  | 1.866611  |
| H  | -1.611978 | 3.201922  | 2.387584  |
| C  | 1.138684  | 2.577307  | -0.334918 |
| H  | -0.455270 | 1.735754  | -1.549775 |
| C  | 1.485175  | 3.159271  | 0.898145  |
| H  | 0.766189  | 3.847650  | 2.832242  |
| H  | 1.917111  | 2.385739  | -1.088766 |
| H  | 2.533108  | 3.420654  | 1.105050  |
| Au | -2.679764 | -0.374196 | -0.599113 |
| H  | -4.433170 | -2.760797 | -3.523268 |
| N  | -6.035030 | -3.780117 | -1.577184 |
| C  | -6.661289 | -3.761250 | -2.895077 |
| H  | -7.696818 | -4.137571 | -2.813982 |
| H  | -6.706970 | -2.731853 | -3.315090 |
| H  | -6.119207 | -4.407439 | -3.621301 |
| C  | -6.774068 | -4.315203 | -0.437843 |
| H  | -6.849712 | -3.572392 | 0.386698  |
| H  | -7.801089 | -4.570483 | -0.755172 |
| H  | -6.303327 | -5.238124 | -0.030822 |
| C  | -0.727440 | -2.321822 | 5.697470  |
| H  | -1.448142 | -3.147863 | 5.875610  |
| H  | 0.216482  | -2.606408 | 6.211786  |
| H  | -1.117953 | -1.414350 | 6.200688  |

**[(PPh<sub>3</sub>)Au(*para*-aniline-alkene)] anti-Markovnikov**

-1885.82701285 A.U.

|   |           |           |           |
|---|-----------|-----------|-----------|
| P | 2.685547  | -0.320526 | -0.007711 |
| H | -2.010936 | -0.957673 | -1.386938 |
| C | -1.701188 | -0.659435 | -0.360801 |
| C | -2.494539 | -1.518206 | 0.654527  |
| C | -1.853231 | 1.674599  | -1.365047 |
| C | -1.831024 | 0.837796  | -0.219848 |
| C | -1.820770 | 3.071241  | -1.259492 |
| C | -1.817047 | 1.490250  | 1.039849  |
| C | -1.785101 | 3.714567  | -0.001643 |
| H | -1.821050 | 3.682383  | -2.178262 |
| C | -1.791999 | 2.890158  | 1.143774  |
| H | -1.782041 | 0.886115  | 1.960163  |
| H | -1.765735 | 3.355247  | 2.144095  |
| C | 3.409342  | -0.797035 | 1.614912  |
| C | 4.293619  | 0.031312  | 2.338118  |
| C | 3.056129  | -2.064395 | 2.131161  |
| C | 4.828620  | -0.412937 | 3.560284  |
| H | 4.559525  | 1.026532  | 1.948545  |
| C | 3.599702  | -2.505610 | 3.348171  |
| H | 2.342962  | -2.696920 | 1.576498  |
| C | 4.486809  | -1.680536 | 4.064048  |
| H | 5.515563  | 0.238647  | 4.123395  |
| H | 3.320480  | -3.494254 | 3.745337  |
| H | 4.906440  | -2.023694 | 5.023013  |
| C | 2.893863  | 1.509978  | -0.126301 |
| C | 4.115028  | 2.090367  | -0.537586 |
| C | 1.799576  | 2.343093  | 0.202619  |
| C | 4.242056  | 3.488450  | -0.602811 |

|    |           |           |           |
|----|-----------|-----------|-----------|
| H  | 4.964618  | 1.447124  | -0.818171 |
| C  | 1.933934  | 3.739400  | 0.134315  |
| H  | 0.828107  | 1.908514  | 0.493223  |
| C  | 3.153637  | 4.313998  | -0.264992 |
| H  | 5.195700  | 3.934949  | -0.926666 |
| H  | 1.066694  | 4.370766  | 0.381955  |
| H  | 3.254908  | 5.409468  | -0.324395 |
| C  | 3.862764  | -0.990291 | -1.253131 |
| C  | 5.162656  | -1.429481 | -0.923344 |
| C  | 3.422501  | -1.046137 | -2.595022 |
| C  | 6.017157  | -1.909041 | -1.932085 |
| H  | 5.505120  | -1.399150 | 0.123222  |
| C  | 4.282848  | -1.519048 | -3.598205 |
| H  | 2.397858  | -0.723221 | -2.844234 |
| C  | 5.581250  | -1.950824 | -3.268242 |
| H  | 7.030661  | -2.252670 | -1.670656 |
| H  | 3.934896  | -1.559538 | -4.642461 |
| H  | 6.253095  | -2.328092 | -4.055477 |
| Au | 0.407299  | -0.817161 | -0.245159 |
| H  | -2.190531 | -1.276038 | 1.695018  |
| H  | -2.217687 | -2.582581 | 0.499967  |
| H  | -1.863699 | 1.204769  | -2.362664 |
| C  | -6.077679 | -1.887682 | -0.701450 |
| C  | -6.821076 | -0.949786 | 0.072167  |
| C  | -4.705854 | -2.072970 | -0.483669 |
| C  | -6.103687 | -0.212423 | 1.056768  |
| C  | -3.994323 | -1.351108 | 0.497603  |
| H  | -4.166545 | -2.808791 | -1.104918 |
| C  | -4.731225 | -0.417810 | 1.255693  |
| H  | -6.615575 | 0.533811  | 1.680029  |
| H  | -4.216067 | 0.178489  | 2.025672  |
| H  | -6.570354 | -2.485149 | -1.481113 |
| N  | -8.188398 | -0.764478 | -0.124658 |
| C  | -8.854686 | -1.441083 | -1.220600 |
| H  | -9.932265 | -1.189162 | -1.209681 |
| H  | -8.446236 | -1.155961 | -2.221379 |
| H  | -8.772461 | -2.548583 | -1.132948 |
| C  | -8.879082 | 0.292802  | 0.588381  |
| H  | -8.476162 | 1.309108  | 0.355798  |
| H  | -9.951719 | 0.282354  | 0.316203  |
| H  | -8.815514 | 0.156072  | 1.692149  |
| C  | -1.764174 | 5.223598  | 0.103312  |
| H  | -2.766841 | 5.660713  | -0.101956 |
| H  | -1.461433 | 5.561050  | 1.116028  |
| H  | -1.063646 | 5.675711  | -0.631150 |

**[(PPh<sub>3</sub>)Au(*para*-aniline-alkene)]<sup>+</sup> Markovnikov**

-1885.83233447 A.U.

|   |           |           |           |
|---|-----------|-----------|-----------|
| P | 2.516617  | -0.396880 | -0.022716 |
| H | -1.985801 | -2.662738 | 0.306215  |
| C | -1.714727 | -1.655232 | -0.079572 |
| C | -2.506677 | -0.554340 | 0.680002  |
| C | -2.078438 | 1.474892  | -0.829646 |
| C | -1.886324 | 0.817503  | 0.403407  |
| C | -1.373657 | 2.651260  | -1.136898 |
| C | -1.006533 | 1.411278  | 1.332735  |
| C | -0.453670 | 3.216418  | -0.224762 |
| H | -1.528737 | 3.136042  | -2.115984 |
| C | -0.299082 | 2.583020  | 1.026128  |
| H | -0.839121 | 0.915570  | 2.303096  |
| H | 0.407487  | 2.997298  | 1.763486  |
| C | 2.855739  | 0.535707  | -1.572946 |
| C | 4.119142  | 0.570484  | -2.198798 |
| C | 1.783769  | 1.286163  | -2.107218 |
| C | 4.308915  | 1.361653  | -3.346416 |
| H | 4.955067  | -0.019097 | -1.790164 |
| C | 1.984776  | 2.084664  | -3.243511 |
| H | 0.792755  | 1.253015  | -1.625021 |
| C | 3.246796  | 2.123570  | -3.865672 |
| H | 5.295653  | 1.383983  | -3.835810 |
| H | 1.145172  | 2.674582  | -3.644015 |
| H | 3.401889  | 2.745154  | -4.761893 |
| C | 3.968079  | -1.499545 | 0.207508  |
| C | 5.162811  | -1.064288 | 0.821643  |



---

|    |            |           |           |
|----|------------|-----------|-----------|
| C  | 3.868767   | -2.823357 | -0.274584 |
| C  | 6.250546   | -1.946006 | 0.942262  |
| H  | 5.237499   | -0.035700 | 1.209564  |
| C  | 4.961530   | -3.698192 | -0.157101 |
| H  | 2.924532   | -3.163210 | -0.732043 |
| C  | 6.152487   | -3.260643 | 0.450827  |
| H  | 7.180114   | -1.604634 | 1.424933  |
| H  | 4.878934   | -4.730082 | -0.533280 |
| H  | 7.006127   | -3.949972 | 0.549197  |
| C  | 2.693037   | 0.891600  | 1.286157  |
| C  | 3.234939   | 2.168145  | 1.029479  |
| C  | 2.209373   | 0.584468  | 2.577365  |
| C  | 3.295129   | 3.126036  | 2.057188  |
| H  | 3.593642   | 2.421603  | 0.019743  |
| C  | 2.277227   | 1.541431  | 3.601624  |
| H  | 1.755085   | -0.401991 | 2.767237  |
| C  | 2.817911   | 2.815406  | 3.342543  |
| H  | 3.709384   | 4.124807  | 1.847351  |
| H  | 1.891284   | 1.298023  | 4.604045  |
| H  | 2.857851   | 3.570390  | 4.143565  |
| Au | 0.347611   | -1.282417 | -0.014998 |
| H  | -1.995955  | -1.636345 | -1.158681 |
| H  | -2.364443  | -0.744560 | 1.769102  |
| H  | -2.781674  | 1.044617  | -1.561004 |
| C  | -6.205229  | 0.531974  | 0.777656  |
| C  | -6.880118  | -0.479091 | 0.031882  |
| C  | -4.819269  | 0.483726  | 0.963098  |
| C  | -6.077191  | -1.519537 | -0.512685 |
| C  | -4.019208  | -0.550515 | 0.426572  |
| H  | -4.334573  | 1.290748  | 1.537792  |
| C  | -4.687583  | -1.545187 | -0.312458 |
| H  | -6.533258  | -2.326030 | -1.103459 |
| H  | -4.113666  | -2.374485 | -0.752594 |
| H  | -6.764370  | 1.369729  | 1.217020  |
| N  | -8.259585  | -0.446120 | -0.154893 |
| C  | -9.028200  | 0.682018  | 0.334399  |
| H  | -10.098988 | 0.527931  | 0.101623  |
| H  | -8.940951  | 0.798302  | 1.439474  |
| H  | -8.715171  | 1.650090  | -0.127080 |
| C  | -8.896461  | -1.448339 | -0.987098 |
| H  | -8.734022  | -2.478767 | -0.594345 |
| H  | -9.988424  | -1.270615 | -1.010273 |
| H  | -8.525680  | -1.433594 | -2.040949 |
| C  | 0.394656   | 4.411150  | -0.595643 |
| H  | -0.081237  | 5.031945  | -1.382300 |
| H  | 0.599874   | 5.059003  | 0.281359  |
| H  | 1.380713   | 4.076244  | -0.990879 |

### Using CH<sub>2</sub>=CHPh(OMe on para) as alkene:

[(PPh<sub>3</sub>)Au(alkene)]<sup>+</sup>

-1595.40785425 A.U.

|   |           |           |           |
|---|-----------|-----------|-----------|
| P | 1.334553  | 0.256632  | 0.010449  |
| H | -0.711867 | -4.330162 | -0.662326 |
| C | -1.271105 | -3.395666 | -0.833993 |
| C | -1.966650 | -2.813421 | 0.237940  |
| C | -3.348630 | -1.089022 | -0.996645 |
| C | -2.930462 | -1.716314 | 0.206628  |
| C | -4.148373 | 0.053251  | -0.980743 |
| C | -3.387638 | -1.170400 | 1.440076  |
| C | -4.557568 | 0.608193  | 0.261338  |
| H | -4.440714 | 0.519721  | -1.930835 |
| C | -4.185505 | -0.030569 | 1.472183  |
| H | -3.085282 | -1.645259 | 2.387384  |
| H | -4.531835 | 0.405074  | 2.420749  |
| C | 0.259819  | 1.733741  | -0.163363 |
| C | 0.748929  | 2.916170  | -0.760519 |
| C | -1.055179 | 1.693020  | 0.353820  |
| C | -0.075196 | 4.052932  | -0.829251 |
| H | 1.769304  | 2.948964  | -1.173755 |
| C | -1.868096 | 2.835727  | 0.288532  |
| H | -1.451921 | 0.768167  | 0.804652  |

|    |           |           |           |
|----|-----------|-----------|-----------|
| C  | -1.378686 | 4.015620  | -0.302483 |
| H  | 0.306308  | 4.973768  | -1.296938 |
| H  | -2.890070 | 2.799740  | 0.696941  |
| H  | -2.017607 | 4.911030  | -0.355570 |
| C  | 2.696617  | 0.439670  | -1.194491 |
| C  | 3.921912  | 1.030057  | -0.815300 |
| C  | 2.489146  | 0.024918  | -2.529225 |
| C  | 4.932002  | 1.208006  | -1.776143 |
| H  | 4.088851  | 1.344229  | 0.227100  |
| C  | 3.502948  | 0.209357  | -3.482045 |
| H  | 1.535473  | -0.446416 | -2.820354 |
| C  | 4.723504  | 0.800851  | -3.105890 |
| H  | 5.889613  | 1.664334  | -1.481373 |
| H  | 3.343294  | -0.116778 | -4.521358 |
| H  | 5.520003  | 0.938421  | -3.853603 |
| C  | 2.087765  | 0.337663  | 1.674618  |
| C  | 2.091978  | 1.536582  | 2.419600  |
| C  | 2.717288  | -0.820830 | 2.183921  |
| C  | 2.733299  | 1.572189  | 3.670117  |
| H  | 1.596471  | 2.438194  | 2.026612  |
| C  | 3.357567  | -0.773744 | 3.431582  |
| H  | 2.706542  | -1.757423 | 1.601808  |
| C  | 3.365589  | 0.422044  | 4.174602  |
| H  | 2.737143  | 2.506049  | 4.253319  |
| H  | 3.849154  | -1.675294 | 3.828598  |
| H  | 3.864770  | 0.455284  | 5.155476  |
| Au | 0.067556  | -1.662298 | -0.283265 |
| H  | -1.548518 | -3.185003 | -1.881784 |
| H  | -3.021314 | -1.489542 | -1.968204 |
| H  | -1.790823 | -3.248310 | 1.240363  |
| C  | -5.695222 | 2.452914  | -0.778960 |
| H  | -4.821948 | 2.801279  | -1.373691 |
| H  | -6.356712 | 1.826594  | -1.415896 |
| H  | -6.263752 | 3.327671  | -0.414576 |
| O  | -5.273765 | 1.742515  | 0.391627  |

**[(PPh<sub>3</sub>)Au(alkene)(*para*-aniline)]<sup>+</sup>**

-1960.94445311 A.U.

|   |           |           |           |
|---|-----------|-----------|-----------|
| P | 2.075556  | -0.175709 | -0.219169 |
| H | 0.791132  | -2.960710 | 2.559576  |
| C | 0.067331  | -2.823014 | 1.738712  |
| C | -1.193420 | -2.194221 | 2.027104  |
| C | -2.503036 | -3.033394 | 0.009871  |
| C | -2.450015 | -2.377302 | 1.260657  |
| C | -3.695088 | -3.130306 | -0.725478 |
| C | -3.655581 | -1.814409 | 1.751636  |
| C | -4.884590 | -2.563368 | -0.214621 |
| H | -3.683485 | -3.645381 | -1.696216 |
| C | -4.851594 | -1.905517 | 1.035886  |
| H | -3.640113 | -1.272599 | 2.710887  |
| H | -5.783430 | -1.461773 | 1.417376  |
| C | 2.752610  | 1.396249  | 0.450966  |
| C | 2.918135  | 2.559171  | -0.327439 |
| C | 3.019353  | 1.438643  | 1.838890  |
| C | 3.343846  | 3.754091  | 0.280070  |
| H | 2.696831  | 2.536833  | -1.405685 |
| C | 3.452214  | 2.630725  | 2.437931  |
| H | 2.864051  | 0.535171  | 2.451660  |
| C | 3.610318  | 3.793328  | 1.659282  |
| H | 3.461714  | 4.662688  | -0.331472 |
| H | 3.652880  | 2.657815  | 3.520586  |
| H | 3.936619  | 4.733183  | 2.132096  |
| C | 1.770694  | 0.150098  | -2.004122 |
| C | 2.651822  | -0.294690 | -3.014197 |
| C | 0.607775  | 0.876639  | -2.355250 |
| C | 2.372780  | -0.012104 | -4.362725 |
| H | 3.556758  | -0.863100 | -2.748258 |
| C | 0.343253  | 1.160759  | -3.704623 |
| H | -0.087902 | 1.211751  | -1.568405 |
| C | 1.221606  | 0.717146  | -4.710371 |
| H | 3.062479  | -0.364371 | -5.146372 |
| H | -0.563425 | 1.728228  | -3.967414 |
| H | 1.007241  | 0.937173  | -5.768473 |
| C | 3.514369  | -1.325281 | -0.196873 |

---

|    |           |           |           |
|----|-----------|-----------|-----------|
| C  | 4.851029  | -0.868698 | -0.205102 |
| C  | 3.250195  | -2.711987 | -0.193793 |
| C  | 5.908744  | -1.794361 | -0.212253 |
| H  | 5.061022  | 0.212740  | -0.203973 |
| C  | 4.310134  | -3.633066 | -0.213633 |
| H  | 2.204427  | -3.057688 | -0.160124 |
| C  | 5.640745  | -3.175515 | -0.220044 |
| H  | 6.949891  | -1.433988 | -0.213289 |
| H  | 4.096757  | -4.713758 | -0.212237 |
| H  | 6.472420  | -3.897947 | -0.224320 |
| Au | 0.077152  | -0.750158 | 0.966985  |
| H  | 0.131875  | -3.585541 | 0.943210  |
| H  | -1.344929 | -1.803983 | 3.049699  |
| H  | -1.585025 | -3.464567 | -0.418992 |
| C  | -3.025707 | 2.149819  | -0.238459 |
| C  | -2.516850 | 3.446451  | 0.056009  |
| C  | -2.287077 | 0.994880  | 0.069602  |
| C  | -1.248529 | 3.507853  | 0.699728  |
| C  | -1.009926 | 1.043913  | 0.682091  |
| H  | -2.736184 | 0.019055  | -0.183834 |
| C  | -0.526827 | 2.338085  | 0.991278  |
| H  | -0.807776 | 4.476255  | 0.977042  |
| H  | 0.455121  | 2.455877  | 1.477931  |
| H  | -4.012217 | 2.029024  | -0.708844 |
| N  | -3.229008 | 4.603835  | -0.271173 |
| C  | -4.589532 | 4.490265  | -0.759143 |
| H  | -4.989388 | 5.499369  | -0.976972 |
| H  | -4.638813 | 3.903717  | -1.704592 |
| H  | -5.278646 | 3.997477  | -0.028787 |
| C  | -2.748417 | 5.891410  | 0.189595  |
| H  | -1.726322 | 6.108051  | -0.195698 |
| H  | -3.416934 | 6.690800  | -0.184156 |
| H  | -2.705256 | 5.972636  | 1.304618  |
| C  | -6.182493 | -3.223249 | -2.114217 |
| H  | -5.526060 | -2.731822 | -2.870109 |
| H  | -5.917809 | -4.305531 | -2.065154 |
| H  | -7.236087 | -3.128592 | -2.440762 |
| O  | -6.097044 | -2.594936 | -0.846044 |

**[(PPh<sub>3</sub>)Au(*para*-aniline)+(PPh<sub>3</sub>)Au(alkene)]<sup>+</sup> adduct**

-3132.52910522 A.U.

|   |           |           |           |
|---|-----------|-----------|-----------|
| P | 3.799141  | -1.171785 | 0.040515  |
| H | -0.797076 | -0.206315 | -1.222150 |
| C | -0.111180 | 0.659170  | -1.167430 |
| C | -0.250966 | 1.480997  | -0.014625 |
| C | 0.746107  | 3.624990  | -0.875796 |
| C | 0.201014  | 2.831759  | 0.175158  |
| C | 1.192151  | 4.926714  | -0.652263 |
| C | 0.092613  | 3.430556  | 1.464890  |
| C | 1.075288  | 5.496666  | 0.642994  |
| H | 1.606943  | 5.506827  | -1.487628 |
| C | 0.534944  | 4.725775  | 1.703445  |
| H | -0.350327 | 2.846764  | 2.286588  |
| H | 0.463423  | 5.185970  | 2.699671  |
| C | 5.163628  | -0.543421 | -1.013042 |
| C | 6.207692  | -1.385398 | -1.453606 |
| C | 5.174857  | 0.830003  | -1.344013 |
| C | 7.259785  | -0.849845 | -2.216568 |
| H | 6.195100  | -2.459255 | -1.208357 |
| C | 6.231664  | 1.357481  | -2.102566 |
| H | 4.350224  | 1.481712  | -1.009859 |
| C | 7.274029  | 0.518753  | -2.539041 |
| H | 8.072169  | -1.507733 | -2.562601 |
| H | 6.238844  | 2.427847  | -2.360872 |
| H | 8.099092  | 0.933386  | -3.138976 |
| C | 3.771459  | -2.985896 | -0.228690 |
| C | 4.095021  | -3.914000 | 0.781450  |
| C | 3.335682  | -3.442692 | -1.493901 |
| C | 3.973716  | -5.292594 | 0.527497  |
| H | 4.433156  | -3.565270 | 1.769659  |
| C | 3.230062  | -4.818751 | -1.744805 |
| H | 3.065544  | -2.715676 | -2.277569 |
| C | 3.542857  | -5.745815 | -0.731504 |
| H | 4.219218  | -6.015591 | 1.320784  |

---

|    |           |           |           |
|----|-----------|-----------|-----------|
| H  | 2.891747  | -5.170551 | -2.731751 |
| H  | 3.448966  | -6.825631 | -0.925306 |
| C  | 4.344362  | -0.894862 | 1.769672  |
| C  | 5.680972  | -1.154222 | 2.148693  |
| C  | 3.418113  | -0.430382 | 2.728247  |
| C  | 6.076516  | -0.968737 | 3.483149  |
| H  | 6.413693  | -1.493916 | 1.399366  |
| C  | 3.821274  | -0.245928 | 4.061424  |
| H  | 2.382817  | -0.209579 | 2.423249  |
| C  | 5.147736  | -0.518456 | 4.440095  |
| H  | 7.118253  | -1.171037 | 3.776930  |
| H  | 3.097276  | 0.119256  | 4.806477  |
| H  | 5.463478  | -0.370925 | 5.484682  |
| Au | 1.748224  | -0.214765 | -0.487308 |
| H  | 0.087541  | 1.140074  | -2.142658 |
| H  | -0.720286 | 1.007634  | 0.865219  |
| H  | 0.823117  | 3.203873  | -1.889075 |
| P  | -3.320041 | -1.926921 | 0.036068  |
| C  | -2.773721 | 4.597938  | 0.895071  |
| C  | -2.259343 | 5.162984  | -0.309744 |
| C  | -3.218061 | 3.271356  | 0.934179  |
| C  | -2.297067 | 4.346618  | -1.479310 |
| C  | -3.188097 | 2.422809  | -0.203838 |
| H  | -3.590089 | 2.880948  | 1.895948  |
| C  | -2.742897 | 3.022092  | -1.412215 |
| H  | -1.958600 | 4.740679  | -2.447110 |
| H  | -2.719155 | 2.424777  | -2.338851 |
| C  | -4.473340 | -2.838756 | 1.130825  |
| C  | -4.074617 | -3.976931 | 1.866201  |
| C  | -5.807329 | -2.380300 | 1.206987  |
| C  | -5.012237 | -4.657288 | 2.661517  |
| H  | -3.030683 | -4.326844 | 1.822388  |
| C  | -6.739551 | -3.068365 | 2.000813  |
| H  | -6.108101 | -1.478428 | 0.648327  |
| C  | -6.343234 | -4.206251 | 2.726941  |
| H  | -4.700735 | -5.543848 | 3.235922  |
| H  | -7.778723 | -2.708967 | 2.059076  |
| H  | -7.074283 | -4.740732 | 3.353625  |
| C  | -1.640062 | -2.290297 | 0.717146  |
| C  | -0.749307 | -3.205664 | 0.118975  |
| C  | -1.248877 | -1.598362 | 1.887180  |
| C  | 0.513180  | -3.438470 | 0.694645  |
| H  | -1.042417 | -3.741361 | -0.797502 |
| C  | 0.011247  | -1.834078 | 2.457418  |
| H  | -1.941449 | -0.875871 | 2.350440  |
| C  | 0.893092  | -2.756674 | 1.863078  |
| H  | 1.204615  | -4.154936 | 0.226891  |
| H  | 0.305633  | -1.300588 | 3.375038  |
| H  | 1.883260  | -2.938762 | 2.307649  |
| C  | -3.347499 | -2.800266 | -1.580431 |
| C  | -3.721137 | -4.156844 | -1.694199 |
| C  | -2.933232 | -2.088078 | -2.728678 |
| C  | -3.667741 | -4.795301 | -2.945149 |
| H  | -4.060156 | -4.713196 | -0.806137 |
| C  | -2.876373 | -2.733434 | -3.974839 |
| H  | -2.669225 | -1.020624 | -2.643129 |
| C  | -3.242302 | -4.087607 | -4.083837 |
| H  | -3.966172 | -5.851897 | -3.031182 |
| H  | -2.557890 | -2.172669 | -4.867567 |
| H  | -3.206932 | -4.590544 | -5.062974 |
| Au | -3.505840 | 0.403913  | -0.092873 |
| H  | -2.817906 | 5.197380  | 1.814458  |
| N  | -1.723776 | 6.444604  | -0.341247 |
| C  | -1.805281 | 7.295815  | 0.837132  |
| H  | -1.244042 | 8.230582  | 0.653356  |
| H  | -2.854886 | 7.562324  | 1.104915  |
| H  | -1.337476 | 6.802307  | 1.714166  |
| C  | -1.453305 | 7.066827  | -1.629145 |
| H  | -2.364462 | 7.139152  | -2.268154 |
| H  | -1.068150 | 8.091117  | -1.468926 |
| H  | -0.685546 | 6.498234  | -2.197566 |
| C  | 2.022909  | 7.595422  | -0.031703 |
| H  | 2.251032  | 8.555419  | 0.467040  |
| H  | 2.963321  | 7.167450  | -0.444457 |

---

|   |          |          |           |
|---|----------|----------|-----------|
| H | 1.306810 | 7.775756 | -0.862960 |
| O | 1.457485 | 6.751549 | 0.970303  |

**[(PPh<sub>3</sub>)Au(*para*-aniline)--(PPh<sub>3</sub>)Au(alkene)]<sup>+</sup> TS Markovnikov**

-3132.51063184 A.U.

|    |           |           |           |
|----|-----------|-----------|-----------|
| P  | 3.322250  | -2.054460 | -0.014028 |
| H  | -1.008371 | -0.008751 | -1.212399 |
| C  | -0.055336 | 0.556521  | -1.179110 |
| C  | 0.009442  | 1.512710  | -0.033672 |
| C  | 1.914367  | 2.884709  | -1.014631 |
| C  | 1.225113  | 2.369250  | 0.103913  |
| C  | 3.069146  | 3.672582  | -0.875873 |
| C  | 1.728906  | 2.693942  | 1.387128  |
| C  | 3.558382  | 3.971471  | 0.414827  |
| H  | 3.585519  | 4.031531  | -1.776826 |
| C  | 2.875390  | 3.473673  | 1.549343  |
| H  | 1.209045  | 2.308803  | 2.279117  |
| H  | 3.281177  | 3.701708  | 2.546048  |
| C  | 4.628688  | -1.017136 | 0.756270  |
| C  | 5.582387  | -1.586356 | 1.632740  |
| C  | 4.657260  | 0.372107  | 0.495826  |
| C  | 6.567683  | -0.776601 | 2.219817  |
| H  | 5.541094  | -2.661271 | 1.871892  |
| C  | 5.640882  | 1.177858  | 1.095527  |
| H  | 3.895008  | 0.830549  | -0.156526 |
| C  | 6.598334  | 0.604550  | 1.950462  |
| H  | 7.309064  | -1.224382 | 2.900033  |
| H  | 5.642606  | 2.263180  | 0.911584  |
| H  | 7.365560  | 1.238756  | 2.421871  |
| C  | 4.095757  | -3.099636 | -1.310086 |
| C  | 5.468752  | -3.424157 | -1.321036 |
| C  | 3.242962  | -3.617434 | -2.312206 |
| C  | 5.978880  | -4.269729 | -2.320844 |
| H  | 6.144669  | -3.008814 | -0.557851 |
| C  | 3.757106  | -4.472050 | -3.301069 |
| H  | 2.176128  | -3.336642 | -2.315699 |
| C  | 5.125344  | -4.798658 | -3.305912 |
| H  | 7.052189  | -4.515912 | -2.330612 |
| H  | 3.089170  | -4.874715 | -4.078535 |
| H  | 5.530351  | -5.461296 | -4.086720 |
| C  | 2.822369  | -3.222111 | 1.319378  |
| C  | 2.461652  | -2.677977 | 2.574059  |
| C  | 2.667282  | -4.604030 | 1.086939  |
| C  | 1.952242  | -3.510755 | 3.582327  |
| H  | 2.578510  | -1.597393 | 2.757189  |
| C  | 2.144611  | -5.431371 | 2.097891  |
| H  | 2.954450  | -5.037662 | 0.115981  |
| C  | 1.785349  | -4.888601 | 3.343574  |
| H  | 1.679433  | -3.082005 | 4.559394  |
| H  | 2.024467  | -6.509789 | 1.909984  |
| H  | 1.379287  | -5.540159 | 4.132886  |
| Au | 1.507491  | -0.785179 | -0.731380 |
| H  | 0.115179  | 1.024624  | -2.170080 |
| H  | -0.258775 | 1.045074  | 0.930410  |
| H  | 1.553363  | 2.651183  | -2.026477 |
| P  | -4.122565 | -0.707592 | 0.077922  |
| C  | -0.691431 | 4.856408  | 1.078798  |
| C  | -0.241584 | 5.402162  | -0.173553 |
| C  | -1.289575 | 3.611448  | 1.114971  |
| C  | -0.665453 | 4.738426  | -1.379138 |
| C  | -1.494747 | 2.801495  | -0.065919 |
| H  | -1.534934 | 3.180356  | 2.100100  |
| C  | -1.269187 | 3.497138  | -1.310949 |
| H  | -0.450734 | 5.178453  | -2.361974 |
| H  | -1.485858 | 2.968074  | -2.253865 |
| C  | -5.302580 | -1.037832 | -1.286216 |
| C  | -6.157993 | -2.161222 | -1.254294 |
| C  | -5.320684 | -0.169579 | -2.399260 |
| C  | -7.020290 | -2.412707 | -2.333096 |
| H  | -6.157155 | -2.835367 | -0.383292 |
| C  | -6.184437 | -0.428909 | -3.477342 |
| H  | -4.659613 | 0.712946  | -2.413266 |
| C  | -7.033530 | -1.548919 | -3.444526 |
| H  | -7.689888 | -3.286451 | -2.304612 |

---

|    |           |           |           |
|----|-----------|-----------|-----------|
| H  | -6.198808 | 0.251799  | -4.342729 |
| H  | -7.714599 | -1.747846 | -4.286768 |
| C  | -4.979451 | -1.141837 | 1.637243  |
| C  | -5.014238 | -2.465390 | 2.130346  |
| C  | -5.652439 | -0.112451 | 2.332038  |
| C  | -5.727122 | -2.753242 | 3.306394  |
| H  | -4.473963 | -3.267225 | 1.602256  |
| C  | -6.366831 | -0.409054 | 3.504284  |
| H  | -5.608567 | 0.921965  | 1.952659  |
| C  | -6.404914 | -1.728264 | 3.991315  |
| H  | -5.752389 | -3.784990 | 3.690642  |
| H  | -6.891215 | 0.395092  | 4.043583  |
| H  | -6.961740 | -1.958241 | 4.913189  |
| C  | -2.768885 | -1.946400 | -0.124042 |
| C  | -2.537064 | -2.576116 | -1.364512 |
| C  | -1.862078 | -2.146785 | 0.944042  |
| C  | -1.410368 | -3.402312 | -1.531340 |
| H  | -3.234800 | -2.420829 | -2.202479 |
| C  | -0.749529 | -2.984634 | 0.775719  |
| H  | -2.028410 | -1.643747 | 1.910597  |
| C  | -0.519435 | -3.609239 | -0.465155 |
| H  | -1.232534 | -3.887705 | -2.503685 |
| H  | -0.047174 | -3.144348 | 1.607238  |
| H  | 0.362440  | -4.255917 | -0.590615 |
| Au | -2.999683 | 1.325911  | 0.025349  |
| H  | -0.502773 | 5.391321  | 2.018710  |
| N  | 0.596325  | 6.475720  | -0.213330 |
| C  | 1.139415  | 7.032259  | 1.027397  |
| H  | 1.859017  | 7.833296  | 0.782157  |
| H  | 0.341517  | 7.473665  | 1.661930  |
| H  | 1.672844  | 6.251338  | 1.611565  |
| C  | 1.113759  | 6.959314  | -1.492342 |
| H  | 0.294278  | 7.280649  | -2.169109 |
| H  | 1.765317  | 7.833507  | -1.315370 |
| H  | 1.711035  | 6.172612  | -2.005126 |
| C  | 5.425601  | 5.218768  | -0.428918 |
| H  | 6.281347  | 5.768615  | 0.005430  |
| H  | 5.811629  | 4.408225  | -1.087936 |
| H  | 4.815778  | 5.921843  | -1.041247 |
| O  | 4.684646  | 4.697928  | 0.670446  |

**[(PPh<sub>3</sub>)Au(*para*-aniline)--(PPh<sub>3</sub>)Au(alkene)]<sup>+</sup> Intermediate Markovnikov**  
-3132.54068887 A.U.

|   |           |           |           |
|---|-----------|-----------|-----------|
| P | 3.977238  | -0.899242 | -0.090532 |
| H | -0.747502 | 0.075556  | -1.138920 |
| C | 0.028507  | 0.868353  | -1.004827 |
| C | -0.372884 | 1.833049  | 0.140417  |
| C | 0.770321  | 3.973337  | -0.686642 |
| C | 0.655194  | 2.954939  | 0.276198  |
| C | 1.815037  | 4.915104  | -0.643578 |
| C | 1.605612  | 2.924342  | 1.321722  |
| C | 2.774709  | 4.846210  | 0.390084  |
| H | 1.874354  | 5.687189  | -1.423280 |
| C | 2.649706  | 3.851673  | 1.386456  |
| H | 1.539182  | 2.133023  | 2.086864  |
| H | 3.401600  | 3.815806  | 2.188238  |
| C | 5.159872  | 0.411531  | 0.419405  |
| C | 6.278352  | 0.120188  | 1.235066  |
| C | 4.909185  | 1.744212  | 0.024185  |
| C | 7.146485  | 1.151476  | 1.627817  |
| H | 6.456847  | -0.910201 | 1.582643  |
| C | 5.773249  | 2.774600  | 0.433452  |
| H | 4.014080  | 1.980322  | -0.574202 |
| C | 6.893550  | 2.477724  | 1.228849  |
| H | 8.017144  | 0.921226  | 2.261842  |
| H | 5.544092  | 3.816580  | 0.161481  |
| H | 7.566593  | 3.286471  | 1.554667  |
| C | 4.771911  | -1.900048 | -1.412002 |
| C | 6.170810  | -2.060101 | -1.511874 |
| C | 3.924015  | -2.557118 | -2.332668 |
| C | 6.712395  | -2.880811 | -2.515613 |
| H | 6.841019  | -1.534978 | -0.813890 |
| C | 4.471431  | -3.382278 | -3.329327 |
| H | 2.833451  | -2.406693 | -2.268346 |

---

|    |           |           |           |
|----|-----------|-----------|-----------|
| C  | 5.865298  | -3.545988 | -3.420766 |
| H  | 7.804623  | -2.998177 | -2.593551 |
| H  | 3.806979  | -3.890274 | -4.045899 |
| H  | 6.294662  | -4.186699 | -4.206925 |
| C  | 3.916830  | -2.013953 | 1.374374  |
| C  | 3.467189  | -1.457161 | 2.594445  |
| C  | 4.201429  | -3.392107 | 1.299089  |
| C  | 3.302401  | -2.273871 | 3.723412  |
| H  | 3.243460  | -0.379164 | 2.651073  |
| C  | 4.021553  | -4.209338 | 2.430873  |
| H  | 4.562921  | -3.828393 | 0.354381  |
| C  | 3.571121  | -3.654540 | 3.640965  |
| H  | 2.958293  | -1.833664 | 4.672572  |
| H  | 4.242404  | -5.286308 | 2.365479  |
| H  | 3.434804  | -4.296599 | 4.525154  |
| Au | 1.865809  | -0.046219 | -0.625122 |
| H  | 0.093335  | 1.423589  | -1.968130 |
| H  | -0.340333 | 1.264687  | 1.096105  |
| H  | 0.038985  | 4.033296  | -1.509348 |
| P  | -3.353171 | -1.805536 | 0.100340  |
| C  | -3.556142 | 3.792535  | 1.127470  |
| C  | -4.125115 | 4.153331  | -0.138306 |
| C  | -2.445227 | 2.955295  | 1.204081  |
| C  | -3.519997 | 3.595712  | -1.311492 |
| C  | -1.811974 | 2.394759  | 0.037360  |
| H  | -1.997644 | 2.745518  | 2.189511  |
| C  | -2.409153 | 2.756240  | -1.222349 |
| H  | -3.921841 | 3.822317  | -2.307366 |
| H  | -1.946374 | 2.376734  | -2.146813 |
| C  | -4.296131 | -2.390174 | -1.355793 |
| C  | -5.060876 | -3.575352 | -1.303564 |
| C  | -4.199491 | -1.662720 | -2.563699 |
| C  | -5.719627 | -4.029540 | -2.458604 |
| H  | -5.149059 | -4.140333 | -0.362379 |
| C  | -4.853863 | -2.128695 | -3.715268 |
| H  | -3.610864 | -0.730672 | -2.598467 |
| C  | -5.614399 | -3.311263 | -3.663219 |
| H  | -6.320611 | -4.951121 | -2.415230 |
| H  | -4.775025 | -1.561946 | -4.655976 |
| H  | -6.133024 | -3.671701 | -4.565259 |
| C  | -4.134166 | -2.522480 | 1.588045  |
| C  | -3.783112 | -3.814597 | 2.039063  |
| C  | -5.133491 | -1.783212 | 2.257905  |
| C  | -4.439467 | -4.362879 | 3.153626  |
| H  | -2.993430 | -4.384894 | 1.524737  |
| C  | -5.786657 | -2.340829 | 3.368729  |
| H  | -5.389878 | -0.768824 | 1.909967  |
| C  | -5.440580 | -3.629257 | 3.816009  |
| H  | -4.165101 | -5.368607 | 3.508155  |
| H  | -6.564797 | -1.764249 | 3.892458  |
| H  | -5.950379 | -4.062037 | 4.690901  |
| C  | -1.677054 | -2.547835 | -0.029093 |
| C  | -1.236729 | -3.176448 | -1.211565 |
| C  | -0.791436 | -2.391263 | 1.063104  |
| C  | 0.082988  | -3.657090 | -1.292407 |
| H  | -1.918927 | -3.292976 | -2.067769 |
| C  | 0.517783  | -2.884836 | 0.977909  |
| H  | -1.127237 | -1.878711 | 1.979475  |
| C  | 0.955210  | -3.517390 | -0.201352 |
| H  | 0.427223  | -4.146284 | -2.216894 |
| H  | 1.210873  | -2.764711 | 1.823419  |
| H  | 1.988569  | -3.889427 | -0.264006 |
| Au | -2.985442 | 0.457375  | 0.130374  |
| H  | -3.985285 | 4.176667  | 2.061700  |
| N  | -5.209153 | 4.989323  | -0.221155 |
| C  | -5.783746 | 5.571215  | 0.988260  |
| H  | -6.642140 | 6.210466  | 0.714519  |
| H  | -6.153530 | 4.787672  | 1.686058  |
| H  | -5.048000 | 6.202999  | 1.534087  |
| C  | -5.756787 | 5.355822  | -1.523708 |
| H  | -6.100013 | 4.462458  | -2.090745 |
| H  | -6.629170 | 6.018322  | -1.380615 |
| H  | -5.014103 | 5.899686  | -2.149282 |
| C  | 4.017972  | 6.720917  | -0.444857 |

---

|   |          |          |           |
|---|----------|----------|-----------|
| H | 4.933828 | 7.268172 | -0.152110 |
| H | 4.146927 | 6.327599 | -1.479422 |
| H | 3.156143 | 7.426383 | -0.432209 |
| O | 3.856735 | 5.674209 | 0.505353  |

**[(PPh<sub>3</sub>)Au(*para*-aniline-alkene)] Markovnikov**

-1960.98644672 A.U.

|    |            |           |           |
|----|------------|-----------|-----------|
| P  | 2.595258   | -0.535862 | -0.031544 |
| H  | -2.054055  | -2.363135 | -0.231667 |
| C  | -1.750944  | -1.314586 | -0.446439 |
| C  | -2.524581  | -0.368590 | 0.515877  |
| C  | -1.641157  | 1.689543  | -0.757039 |
| C  | -2.071939  | 1.087993  | 0.442477  |
| C  | -1.187766  | 3.022517  | -0.801985 |
| C  | -2.055599  | 1.886039  | 1.609088  |
| C  | -1.153771  | 3.786239  | 0.382480  |
| H  | -0.842152  | 3.437834  | -1.758907 |
| C  | -1.601939  | 3.209223  | 1.590558  |
| H  | -2.392677  | 1.446549  | 2.562474  |
| H  | -1.565224  | 3.817293  | 2.507184  |
| C  | 2.862949   | 0.997718  | 0.953066  |
| C  | 4.037466   | 1.205411  | 1.710395  |
| C  | 1.870125   | 2.002694  | 0.906894  |
| C  | 4.222561   | 2.416261  | 2.399301  |
| H  | 4.805461   | 0.417177  | 1.763650  |
| C  | 2.064874   | 3.214752  | 1.591963  |
| H  | 0.937027   | 1.835469  | 0.343466  |
| C  | 3.240725   | 3.422151  | 2.335591  |
| H  | 5.138334   | 2.573002  | 2.991437  |
| H  | 1.286890   | 3.992609  | 1.545881  |
| H  | 3.388479   | 4.369847  | 2.877827  |
| C  | 3.482165   | -0.230164 | -1.618146 |
| C  | 4.446733   | 0.787534  | -1.777414 |
| C  | 3.171982   | -1.075759 | -2.707357 |
| C  | 5.101155   | 0.947860  | -3.011761 |
| H  | 4.683577   | 1.459074  | -0.937134 |
| C  | 3.833400   | -0.915242 | -3.935434 |
| H  | 2.400198   | -1.854480 | -2.587589 |
| C  | 4.798977   | 0.096805  | -4.089549 |
| H  | 5.851043   | 1.746062  | -3.131340 |
| H  | 3.586339   | -1.577999 | -4.779803 |
| H  | 5.312083   | 0.227011  | -5.055636 |
| C  | 3.622720   | -1.805884 | 0.819871  |
| C  | 3.027139   | -2.514310 | 1.887603  |
| C  | 4.960112   | -2.077458 | 0.459992  |
| C  | 3.769196   | -3.471601 | 2.597711  |
| H  | 1.974425   | -2.316027 | 2.150021  |
| C  | 5.696338   | -3.041899 | 1.170852  |
| H  | 5.423877   | -1.536027 | -0.379952 |
| C  | 5.104447   | -3.736375 | 2.240714  |
| H  | 3.299256   | -4.021289 | 3.428511  |
| H  | 6.739179   | -3.252392 | 0.884756  |
| H  | 5.683347   | -4.492760 | 2.794144  |
| Au | 0.319599   | -1.059044 | -0.283160 |
| H  | -2.067407  | -1.123186 | -1.498185 |
| H  | -2.301669  | -0.708012 | 1.551407  |
| H  | -1.624695  | 1.097959  | -1.684911 |
| C  | -6.134192  | -1.678898 | 0.885887  |
| C  | -6.859366  | -0.942133 | -0.094351 |
| C  | -4.762447  | -1.464162 | 1.077727  |
| C  | -6.129198  | 0.023029  | -0.846610 |
| C  | -4.036230  | -0.517439 | 0.326599  |
| H  | -4.235952  | -2.058458 | 1.844386  |
| C  | -4.757881  | 0.219099  | -0.634975 |
| H  | -6.633104  | 0.637917  | -1.605335 |
| H  | -4.236780  | 0.984636  | -1.232406 |
| H  | -6.639730  | -2.427660 | 1.511505  |
| N  | -8.219914  | -1.151657 | -0.303751 |
| C  | -8.944038  | -2.085072 | 0.536660  |
| H  | -10.001946 | -2.128117 | 0.215045  |
| H  | -8.531006  | -3.118042 | 0.464335  |
| H  | -8.927887  | -1.796129 | 1.615719  |
| C  | -8.938988  | -0.328569 | -1.256459 |
| H  | -8.520699  | -0.420776 | -2.285621 |



---

|   |           |           |           |
|---|-----------|-----------|-----------|
| H | -9.996778 | -0.650715 | -1.298682 |
| H | -8.923809 | 0.755748  | -0.987988 |
| C | -0.146749 | 5.671542  | -0.699193 |
| H | 0.196320  | 6.682564  | -0.406509 |
| H | 0.718534  | 5.100466  | -1.110344 |
| H | -0.919643 | 5.770811  | -1.496206 |
| O | -0.668083 | 5.068441  | 0.474748  |

**[(PPh<sub>3</sub>)Au(*ortho*-aniline)+(PPh<sub>3</sub>)Au(alkene)]<sup>+</sup> adduct**

-3132.52591881 A.U.

|    |           |           |           |
|----|-----------|-----------|-----------|
| P  | 3.497190  | -1.536971 | -0.063676 |
| H  | -1.078296 | 0.047299  | -1.474951 |
| C  | -0.181380 | 0.685945  | -1.504717 |
| C  | 0.188896  | 1.352357  | -0.320110 |
| C  | 1.867230  | 3.012113  | -1.240135 |
| C  | 1.168668  | 2.417972  | -0.151430 |
| C  | 2.879490  | 3.935571  | -1.020477 |
| C  | 1.512015  | 2.822896  | 1.161236  |
| C  | 3.243046  | 4.297217  | 0.306195  |
| H  | 3.433549  | 4.392713  | -1.853242 |
| C  | 2.542827  | 3.742713  | 1.400603  |
| H  | 0.959969  | 2.394099  | 2.011184  |
| H  | 2.785231  | 4.025245  | 2.433637  |
| C  | 4.919161  | -0.409208 | -0.392567 |
| C  | 6.169288  | -0.871982 | -0.857146 |
| C  | 4.724194  | 0.976630  | -0.181152 |
| C  | 7.217027  | 0.039686  | -1.076039 |
| H  | 6.331569  | -1.938430 | -1.070167 |
| C  | 5.777975  | 1.879135  | -0.392557 |
| H  | 3.740388  | 1.365594  | 0.124545  |
| C  | 7.028173  | 1.411429  | -0.835878 |
| H  | 8.187208  | -0.329411 | -1.443347 |
| H  | 5.610308  | 2.955046  | -0.228943 |
| H  | 7.852389  | 2.120329  | -1.010775 |
| C  | 3.893049  | -3.190991 | -0.725323 |
| C  | 4.992096  | -3.942392 | -0.241801 |
| C  | 3.072228  | -3.729129 | -1.741342 |
| C  | 5.259123  | -5.214262 | -0.773654 |
| H  | 5.637098  | -3.539179 | 0.554853  |
| C  | 3.345894  | -5.001996 | -2.268572 |
| H  | 2.213294  | -3.147305 | -2.113295 |
| C  | 4.437342  | -5.744726 | -1.785360 |
| H  | 6.114009  | -5.795317 | -0.394429 |
| H  | 2.703455  | -5.414576 | -3.061799 |
| H  | 4.650352  | -6.742877 | -2.198602 |
| C  | 3.339109  | -1.686511 | 1.771352  |
| C  | 3.011642  | -0.513230 | 2.491089  |
| C  | 3.391024  | -2.923472 | 2.446694  |
| C  | 2.757491  | -0.578736 | 3.868966  |
| H  | 2.927214  | 0.454611  | 1.971663  |
| C  | 3.128163  | -2.982665 | 3.827585  |
| H  | 3.616445  | -3.851732 | 1.901665  |
| C  | 2.812663  | -1.814300 | 4.541253  |
| H  | 2.503135  | 0.340138  | 4.419923  |
| H  | 3.166812  | -3.953684 | 4.345177  |
| H  | 2.603760  | -1.866042 | 5.620993  |
| Au | 1.525840  | -0.554803 | -0.804433 |
| H  | 0.098394  | 1.079507  | -2.496226 |
| H  | -0.340217 | 1.048584  | 0.600991  |
| H  | 1.621510  | 2.722408  | -2.272614 |
| P  | -3.619390 | -1.014796 | 0.231061  |
| C  | -1.059040 | 4.853292  | -0.698246 |
| C  | -1.919735 | 3.727657  | -0.686556 |
| C  | -0.562265 | 5.393092  | 0.498349  |
| C  | -2.266490 | 3.112486  | 0.561723  |
| C  | -0.932420 | 4.831131  | 1.730977  |
| H  | 0.108301  | 6.266268  | 0.462339  |
| C  | -1.777742 | 3.704989  | 1.748802  |
| H  | -0.558499 | 5.260588  | 2.674203  |
| H  | -2.041245 | 3.254236  | 2.720049  |
| C  | -2.045524 | -1.973275 | 0.357260  |
| C  | -1.623078 | -2.881053 | -0.635911 |
| C  | -1.238575 | -1.760602 | 1.499869  |
| C  | -0.413314 | -3.581881 | -0.476196 |

|    |           |           |           |
|----|-----------|-----------|-----------|
| H  | -2.239809 | -3.043106 | -1.533645 |
| C  | -0.037644 | -2.468970 | 1.660247  |
| H  | -1.557209 | -1.033103 | 2.265004  |
| C  | 0.374007  | -3.383706 | 0.671116  |
| H  | -0.086113 | -4.292016 | -1.251643 |
| H  | 0.589676  | -2.299065 | 2.548523  |
| H  | 1.318394  | -3.935564 | 0.789924  |
| C  | -4.199474 | -1.324498 | -1.487704 |
| C  | -5.016268 | -2.428244 | -1.814225 |
| C  | -3.770159 | -0.441580 | -2.506390 |
| C  | -5.389519 | -2.652626 | -3.150924 |
| H  | -5.367454 | -3.109742 | -1.023289 |
| C  | -4.141967 | -0.676822 | -3.840121 |
| H  | -3.158458 | 0.440699  | -2.249607 |
| C  | -4.950582 | -1.781866 | -4.164415 |
| H  | -6.031908 | -3.511543 | -3.400678 |
| H  | -3.808941 | 0.015489  | -4.629428 |
| H  | -5.248609 | -1.959144 | -5.209667 |
| C  | -4.791786 | -1.886960 | 1.335452  |
| C  | -4.648699 | -3.254597 | 1.658197  |
| C  | -5.882689 | -1.150127 | 1.847759  |
| C  | -5.601149 | -3.880194 | 2.480483  |
| H  | -3.790784 | -3.827820 | 1.271515  |
| C  | -6.833086 | -1.783887 | 2.664825  |
| H  | -5.978692 | -0.077720 | 1.609657  |
| C  | -6.693296 | -3.147767 | 2.980498  |
| H  | -5.488848 | -4.946085 | 2.733741  |
| H  | -7.682504 | -1.207788 | 3.063530  |
| H  | -7.436504 | -3.641569 | 3.625934  |
| Au | -3.120173 | 1.240619  | 0.563758  |
| H  | -0.779314 | 5.331458  | -1.648071 |
| N  | -2.418832 | 3.172639  | -1.905550 |
| C  | -1.711255 | 3.510746  | -3.131958 |
| H  | -2.025162 | 2.813047  | -3.936936 |
| H  | -1.912409 | 4.550330  | -3.499049 |
| H  | -0.618132 | 3.404025  | -2.987946 |
| C  | -3.873911 | 3.247770  | -2.090103 |
| H  | -4.394591 | 3.001082  | -1.145986 |
| H  | -4.196016 | 4.270041  | -2.412258 |
| H  | -4.201533 | 2.520829  | -2.862833 |
| C  | 4.706716  | 5.588833  | 1.703408  |
| H  | 5.545687  | 6.288688  | 1.535173  |
| H  | 3.889788  | 6.120211  | 2.239475  |
| H  | 5.060889  | 4.734612  | 2.322792  |
| O  | 4.285574  | 5.155730  | 0.408345  |

**[(PPh<sub>3</sub>)Au(*ortho*-aniline)--(PPh<sub>3</sub>)Au(alkene)]<sup>+</sup> TS Markovnikov**  
-3132.50765533 A.U.

|   |           |           |           |
|---|-----------|-----------|-----------|
| P | 3.456302  | -1.632232 | -0.144005 |
| H | -0.959782 | 0.257816  | -1.432246 |
| C | -0.030580 | 0.846615  | -1.300457 |
| C | -0.040288 | 1.667390  | -0.065631 |
| C | 1.847489  | 3.207600  | -0.803904 |
| C | 1.140529  | 2.532255  | 0.221452  |
| C | 3.015703  | 3.918777  | -0.532429 |
| C | 1.636804  | 2.636939  | 1.537142  |
| C | 3.526256  | 3.973617  | 0.787652  |
| H | 3.576743  | 4.428157  | -1.329777 |
| C | 2.821169  | 3.333736  | 1.831223  |
| H | 1.098557  | 2.129026  | 2.353912  |
| H | 3.186618  | 3.364366  | 2.866698  |
| C | 4.973257  | -0.604774 | -0.367292 |
| C | 6.239108  | -1.140493 | -0.687046 |
| C | 4.830936  | 0.794490  | -0.206699 |
| C | 7.350495  | -0.288825 | -0.814641 |
| H | 6.366207  | -2.219407 | -0.857583 |
| C | 5.947649  | 1.638021  | -0.320935 |
| H | 3.839676  | 1.236847  | -0.016306 |
| C | 7.210445  | 1.096534  | -0.621754 |
| H | 8.332956  | -0.715229 | -1.070948 |
| H | 5.820890  | 2.723724  | -0.187504 |
| H | 8.085276  | 1.757947  | -0.722121 |
| C | 3.767834  | -3.303611 | -0.821466 |
| C | 4.781977  | -4.154779 | -0.319715 |

---

|    |           |           |           |
|----|-----------|-----------|-----------|
| C  | 2.938564  | -3.755215 | -1.872856 |
| C  | 4.964492  | -5.433045 | -0.872169 |
| H  | 5.423208  | -3.825755 | 0.513202  |
| C  | 3.125904  | -5.035476 | -2.420772 |
| H  | 2.140604  | -3.096528 | -2.253753 |
| C  | 4.138591  | -5.873795 | -1.922839 |
| H  | 5.755237  | -6.090244 | -0.477942 |
| H  | 2.477663  | -5.379067 | -3.241915 |
| H  | 4.284978  | -6.876980 | -2.352853 |
| C  | 3.258650  | -1.831452 | 1.685711  |
| C  | 3.056011  | -0.651968 | 2.440464  |
| C  | 3.146943  | -3.085457 | 2.321717  |
| C  | 2.757032  | -0.729942 | 3.808739  |
| H  | 3.108284  | 0.334172  | 1.953322  |
| C  | 2.843433  | -3.157339 | 3.694079  |
| H  | 3.278840  | -4.016697 | 1.751044  |
| C  | 2.647216  | -1.983401 | 4.440587  |
| H  | 2.601526  | 0.196011  | 4.384798  |
| H  | 2.756165  | -4.142249 | 4.178794  |
| H  | 2.406962  | -2.044130 | 5.513451  |
| Au | 1.574347  | -0.474807 | -0.894383 |
| H  | 0.191334  | 1.414144  | -2.226751 |
| H  | -0.347643 | 1.095618  | 0.827418  |
| H  | 1.483088  | 3.147898  | -1.839904 |
| P  | -3.868158 | -0.868644 | 0.277227  |
| C  | -0.961604 | 5.113988  | -0.941185 |
| C  | -1.418968 | 3.779675  | -1.180010 |
| C  | -0.823318 | 5.616142  | 0.349068  |
| C  | -1.650128 | 2.904112  | -0.028301 |
| C  | -1.117984 | 4.820603  | 1.484561  |
| H  | -0.486959 | 6.656977  | 0.481131  |
| C  | -1.519739 | 3.511685  | 1.280507  |
| H  | -1.012996 | 5.231788  | 2.499593  |
| H  | -1.684433 | 2.867626  | 2.160780  |
| C  | -2.340498 | -1.902381 | 0.368033  |
| C  | -1.993382 | -2.832218 | -0.632509 |
| C  | -1.448074 | -1.657666 | 1.439607  |
| C  | -0.763455 | -3.512522 | -0.557350 |
| H  | -2.678109 | -3.026208 | -1.472477 |
| C  | -0.228938 | -2.345835 | 1.514370  |
| H  | -1.711288 | -0.920701 | 2.216732  |
| C  | 0.114645  | -3.273622 | 0.511469  |
| H  | -0.489366 | -4.233651 | -1.343118 |
| H  | 0.466893  | -2.149685 | 2.344243  |
| H  | 1.076780  | -3.804641 | 0.560675  |
| C  | -4.817544 | -1.497885 | -1.159160 |
| C  | -5.916981 | -2.368532 | -1.007461 |
| C  | -4.407790 | -1.099550 | -2.452494 |
| C  | -6.597527 | -2.837683 | -2.144762 |
| H  | -6.246910 | -2.675519 | -0.002811 |
| C  | -5.084744 | -1.581144 | -3.583634 |
| H  | -3.552775 | -0.413940 | -2.568967 |
| C  | -6.182308 | -2.448829 | -3.430343 |
| H  | -7.459918 | -3.511439 | -2.023172 |
| H  | -4.760374 | -1.271736 | -4.589466 |
| H  | -6.719442 | -2.818625 | -4.317630 |
| C  | -4.834156 | -1.260456 | 1.777837  |
| C  | -4.780180 | -2.542107 | 2.369949  |
| C  | -5.670986 | -0.261710 | 2.321927  |
| C  | -5.570300 | -2.820612 | 3.497360  |
| H  | -4.116902 | -3.316271 | 1.951845  |
| C  | -6.461213 | -0.549973 | 3.446901  |
| H  | -5.694117 | 0.740976  | 1.863753  |
| C  | -6.411407 | -1.827689 | 4.033407  |
| H  | -5.528248 | -3.818393 | 3.961387  |
| H  | -7.113607 | 0.228740  | 3.871499  |
| H  | -7.027920 | -2.049913 | 4.918455  |
| Au | -3.013723 | 1.275788  | 0.075155  |
| H  | -0.749417 | 5.786694  | -1.782288 |
| N  | -1.517318 | 3.340810  | -2.485429 |
| C  | -0.934663 | 4.122962  | -3.575358 |
| H  | -0.802112 | 3.461846  | -4.454197 |
| H  | -1.582459 | 4.976359  | -3.883801 |
| H  | 0.062131  | 4.515680  | -3.297244 |

---

|   |           |          |           |
|---|-----------|----------|-----------|
| C | -2.466718 | 2.338438 | -2.958605 |
| H | -3.026962 | 1.901230 | -2.105732 |
| H | -3.199321 | 2.807378 | -3.653921 |
| H | -1.951989 | 1.511394 | -3.490673 |
| C | 5.308621  | 4.678290 | 2.229444  |
| H | 6.249382  | 5.247772 | 2.113157  |
| H | 4.660535  | 5.197859 | 2.970387  |
| H | 5.544451  | 3.655134 | 2.601011  |
| O | 4.705022  | 4.637807 | 0.938491  |

**[(PPh<sub>3</sub>)Au(*ortho*-aniline-alkene)Au(PPh<sub>3</sub>)]<sup>+</sup> Intermediate Markovnikov**

-3132.52781657 A.U.

|    |           |           |           |
|----|-----------|-----------|-----------|
| P  | 3.507495  | -1.436543 | -0.137380 |
| H  | -1.074001 | 0.322211  | -0.971928 |
| C  | -0.129560 | 0.911052  | -0.955673 |
| C  | -0.165757 | 1.922319  | 0.216625  |
| C  | 1.591169  | 3.513420  | -0.794112 |
| C  | 1.121190  | 2.744727  | 0.297046  |
| C  | 2.831584  | 4.154780  | -0.744542 |
| C  | 1.939603  | 2.656016  | 1.439302  |
| C  | 3.651785  | 4.041515  | 0.402952  |
| H  | 3.207774  | 4.740097  | -1.597130 |
| C  | 3.193918  | 3.290441  | 1.506677  |
| H  | 1.614084  | 2.035864  | 2.291299  |
| H  | 3.806642  | 3.177250  | 2.411665  |
| C  | 4.960983  | -0.433780 | -0.669789 |
| C  | 6.236846  | -0.995835 | -0.889977 |
| C  | 4.778835  | 0.962928  | -0.802129 |
| C  | 7.320006  | -0.165501 | -1.223739 |
| H  | 6.390016  | -2.083091 | -0.813188 |
| C  | 5.870438  | 1.789859  | -1.118258 |
| H  | 3.780269  | 1.408529  | -0.659948 |
| C  | 7.141272  | 1.226187  | -1.328891 |
| H  | 8.311660  | -0.610327 | -1.401737 |
| H  | 5.717626  | 2.877366  | -1.197441 |
| H  | 7.995518  | 1.872209  | -1.586040 |
| C  | 3.774164  | -3.154890 | -0.719027 |
| C  | 4.721301  | -4.029167 | -0.136867 |
| C  | 2.985008  | -3.603764 | -1.802013 |
| C  | 4.873109  | -5.334003 | -0.635549 |
| H  | 5.332077  | -3.695162 | 0.717015  |
| C  | 3.144380  | -4.907736 | -2.299557 |
| H  | 2.237100  | -2.923296 | -2.241529 |
| C  | 4.086513  | -5.773986 | -1.716150 |
| H  | 5.610250  | -6.011655 | -0.177062 |
| H  | 2.528884  | -5.250107 | -3.146262 |
| H  | 4.208647  | -6.797585 | -2.103687 |
| C  | 3.641208  | -1.476657 | 1.705198  |
| C  | 3.943984  | -0.270704 | 2.377200  |
| C  | 3.294372  | -2.618509 | 2.460378  |
| C  | 3.901178  | -0.211860 | 3.779179  |
| H  | 4.205089  | 0.630679  | 1.801484  |
| C  | 3.256348  | -2.554725 | 3.864722  |
| H  | 3.054972  | -3.566623 | 1.955327  |
| C  | 3.556353  | -1.351985 | 4.528018  |
| H  | 4.142418  | 0.733273  | 4.291243  |
| H  | 2.993762  | -3.454782 | 4.442823  |
| H  | 3.527786  | -1.305146 | 5.627831  |
| Au | 1.502443  | -0.362144 | -0.684722 |
| H  | -0.048109 | 1.439684  | -1.925636 |
| H  | -0.175100 | 1.316319  | 1.148232  |
| H  | 0.971081  | 3.581569  | -1.699152 |
| P  | -3.641924 | -1.100689 | 0.109148  |
| C  | -2.915874 | 4.661708  | -0.275452 |
| C  | -1.938883 | 3.712351  | -0.645461 |
| C  | -3.467058 | 4.725597  | 1.020490  |
| C  | -1.419132 | 2.815058  | 0.355260  |
| C  | -3.045265 | 3.818481  | 1.992672  |
| H  | -4.234506 | 5.479571  | 1.253688  |
| C  | -2.029796 | 2.870445  | 1.663101  |
| H  | -3.453279 | 3.841956  | 3.014170  |
| H  | -1.518351 | 2.345074  | 2.490559  |
| C  | -2.100712 | -2.090990 | 0.223177  |
| C  | -1.755162 | -3.042904 | -0.761400 |

|    |           |           |           |
|----|-----------|-----------|-----------|
| C  | -1.240749 | -1.876625 | 1.324456  |
| C  | -0.555378 | -3.765272 | -0.641299 |
| H  | -2.412540 | -3.214258 | -1.627474 |
| C  | -0.049013 | -2.606552 | 1.440231  |
| H  | -1.492472 | -1.119968 | 2.085462  |
| C  | 0.295168  | -3.550260 | 0.455493  |
| H  | -0.277421 | -4.495666 | -1.416749 |
| H  | 0.629214  | -2.417841 | 2.285760  |
| H  | 1.241833  | -4.106605 | 0.526106  |
| C  | -4.189281 | -1.157584 | -1.638102 |
| C  | -5.526703 | -1.463723 | -1.967241 |
| C  | -3.267418 | -0.820335 | -2.657545 |
| C  | -5.937684 | -1.431418 | -3.311507 |
| H  | -6.246823 | -1.729085 | -1.177522 |
| C  | -3.687605 | -0.793336 | -3.995603 |
| H  | -2.219016 | -0.592808 | -2.406783 |
| C  | -5.022919 | -1.095186 | -4.324353 |
| H  | -6.981041 | -1.673581 | -3.566420 |
| H  | -2.966306 | -0.535761 | -4.786733 |
| H  | -5.349704 | -1.071731 | -5.375582 |
| C  | -4.928192 | -1.940557 | 1.096254  |
| C  | -4.961642 | -3.350977 | 1.165833  |
| C  | -5.917944 | -1.171759 | 1.746095  |
| C  | -5.990304 | -3.984658 | 1.881241  |
| H  | -4.181626 | -3.950303 | 0.669625  |
| C  | -6.946565 | -1.814673 | 2.454749  |
| H  | -5.877565 | -0.070681 | 1.699080  |
| C  | -6.982304 | -3.219052 | 2.522180  |
| H  | -6.015978 | -5.083748 | 1.941373  |
| H  | -7.718617 | -1.215826 | 2.962084  |
| H  | -7.785404 | -3.721306 | 3.083743  |
| Au | -3.120215 | 1.036626  | 0.782291  |
| H  | -3.279386 | 5.365326  | -1.039345 |
| N  | -1.460672 | 3.645409  | -1.984018 |
| C  | -1.267701 | 4.919931  | -2.672036 |
| H  | -0.644129 | 4.746536  | -3.574140 |
| H  | -2.217352 | 5.402112  | -3.018055 |
| H  | -0.728039 | 5.627723  | -2.012386 |
| C  | -2.186089 | 2.672749  | -2.807995 |
| H  | -2.371496 | 1.748350  | -2.233425 |
| H  | -3.177503 | 3.070616  | -3.145504 |
| H  | -1.590560 | 2.409565  | -3.707237 |
| C  | 5.773855  | 4.499431  | 1.415034  |
| H  | 6.687800  | 5.058480  | 1.140062  |
| H  | 5.365355  | 4.919402  | 2.362038  |
| H  | 6.036101  | 3.427547  | 1.571245  |
| O  | 4.865770  | 4.659493  | 0.330513  |

**[(PPh<sub>3</sub>)Au(*ortho*-aniline-alkene)] Markovnikov**

-1960.97929492 A.U.

|   |           |           |           |
|---|-----------|-----------|-----------|
| P | 2.211017  | -0.548736 | -0.024482 |
| H | -2.375423 | -2.668143 | 0.022902  |
| C | -2.063226 | -1.636676 | -0.254330 |
| C | -2.720594 | -0.601279 | 0.701781  |
| C | -2.400785 | 1.460954  | -0.810063 |
| C | -2.175206 | 0.802934  | 0.420947  |
| C | -1.755837 | 2.663857  | -1.118249 |
| C | -1.296209 | 1.415538  | 1.334363  |
| C | -0.834181 | 3.233923  | -0.210360 |
| H | -1.913873 | 3.165820  | -2.085346 |
| C | -0.614013 | 2.609041  | 1.034202  |
| H | -1.085160 | 0.918467  | 2.295043  |
| H | 0.109489  | 3.005875  | 1.760247  |
| C | 2.640591  | 0.643308  | -1.359001 |
| C | 3.924052  | 0.756954  | -1.931456 |
| C | 1.618722  | 1.544423  | -1.734127 |
| C | 4.182571  | 1.780799  | -2.861957 |
| H | 4.722500  | 0.053553  | -1.646237 |
| C | 1.889722  | 2.579712  | -2.641384 |
| H | 0.610846  | 1.441368  | -1.301418 |
| C | 3.173426  | 2.698117  | -3.207339 |
| H | 5.184261  | 1.866491  | -3.312656 |
| H | 1.091657  | 3.296770  | -2.888634 |
| H | 3.387876  | 3.506315  | -3.924738 |

---

|    |           |           |           |
|----|-----------|-----------|-----------|
| C  | 3.636040  | -1.703579 | 0.080961  |
| C  | 4.817861  | -1.391332 | 0.788186  |
| C  | 3.528466  | -2.938938 | -0.595127 |
| C  | 5.885234  | -2.305206 | 0.807633  |
| H  | 4.898533  | -0.434612 | 1.328884  |
| C  | 4.601181  | -3.845851 | -0.577431 |
| H  | 2.593002  | -3.186321 | -1.124293 |
| C  | 5.779397  | -3.530045 | 0.123316  |
| H  | 6.804426  | -2.060636 | 1.363412  |
| H  | 4.512375  | -4.808524 | -1.105133 |
| H  | 6.616811  | -4.245499 | 0.143084  |
| C  | 2.334806  | 0.513508  | 1.484415  |
| C  | 3.008620  | 1.753107  | 1.476357  |
| C  | 1.670695  | 0.091100  | 2.656898  |
| C  | 3.010379  | 2.563246  | 2.625394  |
| H  | 3.516435  | 2.094562  | 0.560883  |
| C  | 1.676710  | 0.901599  | 3.803531  |
| H  | 1.120647  | -0.864264 | 2.655104  |
| C  | 2.340005  | 2.142801  | 3.787705  |
| H  | 3.531413  | 3.533752  | 2.608064  |
| H  | 1.145889  | 0.569852  | 4.709774  |
| H  | 2.331680  | 2.784293  | 4.683124  |
| Au | 0.016155  | -1.360186 | -0.206741 |
| H  | -2.391472 | -1.449600 | -1.297045 |
| H  | -2.358062 | -0.852456 | 1.721420  |
| H  | -3.065089 | 0.978690  | -1.541262 |
| C  | -6.584656 | -0.559622 | 0.077819  |
| C  | -5.202878 | -0.609288 | -0.220412 |
| C  | -7.057820 | -0.522593 | 1.397229  |
| C  | -4.253526 | -0.626557 | 0.841879  |
| C  | -6.133024 | -0.550530 | 2.452552  |
| H  | -8.140550 | -0.479526 | 1.597347  |
| C  | -4.761613 | -0.604086 | 2.163049  |
| H  | -6.475325 | -0.526034 | 3.499508  |
| H  | -4.038029 | -0.610484 | 2.995686  |
| H  | -7.306032 | -0.555915 | -0.754494 |
| N  | -4.781387 | -0.652398 | -1.601547 |
| C  | -5.430159 | 0.318557  | -2.477076 |
| H  | -4.867972 | 0.379415  | -3.434478 |
| H  | -6.493265 | 0.070090  | -2.738331 |
| H  | -5.418200 | 1.320957  | -2.004116 |
| C  | -4.820828 | -2.001838 | -2.164944 |
| H  | -4.315681 | -2.712906 | -1.484296 |
| H  | -5.868517 | -2.368430 | -2.334877 |
| H  | -4.287954 | -2.019563 | -3.140214 |
| C  | 0.896940  | 4.841288  | 0.145128  |
| H  | 1.340816  | 5.688838  | -0.411941 |
| H  | 0.550521  | 5.206490  | 1.140100  |
| H  | 1.676554  | 4.061204  | 0.305876  |
| O  | -0.172767 | 4.353568  | -0.648867 |

**[(PPh<sub>3</sub>)Au(*para*-aniline)--(PPh<sub>3</sub>)Au(alkene)]<sup>+</sup> TS anti-Markovnikov**  
-3132.50511916 A.U.

|   |           |           |           |
|---|-----------|-----------|-----------|
| P | -4.271528 | -0.451402 | -0.171533 |
| H | 0.410912  | -0.152573 | -0.063724 |
| C | -0.007663 | 0.862845  | 0.073301  |
| C | 0.217128  | 1.705657  | -1.078227 |
| C | 1.014398  | 0.599073  | 2.341565  |
| C | 0.255239  | 1.380460  | 1.445972  |
| C | 1.401217  | 1.078599  | 3.603963  |
| C | -0.145266 | 2.672268  | 1.874819  |
| C | 1.012841  | 2.377318  | 4.003972  |
| H | 2.007202  | 0.434254  | 4.256322  |
| C | 0.224487  | 3.164875  | 3.126937  |
| H | -0.752346 | 3.301508  | 1.204723  |
| H | -0.080743 | 4.166843  | 3.464150  |
| C | -5.513713 | 0.637734  | 0.618597  |
| C | -6.625379 | 0.105598  | 1.308090  |
| C | -5.357695 | 2.036562  | 0.499725  |
| C | -7.578722 | 0.973493  | 1.867273  |
| H | -6.740956 | -0.984983 | 1.412501  |
| C | -6.317135 | 2.896677  | 1.057487  |
| H | -4.477029 | 2.446460  | -0.022050 |
| C | -7.426990 | 2.366141  | 1.740583  |

---

|    |           |           |           |
|----|-----------|-----------|-----------|
| H  | -8.443908 | 0.558842  | 2.407732  |
| H  | -6.193802 | 3.987002  | 0.965918  |
| H  | -8.174848 | 3.042602  | 2.183091  |
| C  | -4.366005 | -2.047911 | 0.732727  |
| C  | -4.980201 | -3.191863 | 0.181713  |
| C  | -3.748721 | -2.120464 | 2.002647  |
| C  | -4.969684 | -4.403068 | 0.897553  |
| H  | -5.456332 | -3.141260 | -0.809955 |
| C  | -3.751971 | -3.329125 | 2.715073  |
| H  | -3.249558 | -1.231200 | 2.422602  |
| C  | -4.356827 | -4.473716 | 2.160716  |
| H  | -5.444172 | -5.296647 | 0.462926  |
| H  | -3.272496 | -3.381275 | 3.705187  |
| H  | -4.349289 | -5.424391 | 2.716340  |
| C  | -4.888906 | -0.810153 | -1.860788 |
| C  | -6.254442 | -0.690615 | -2.197121 |
| C  | -3.960488 | -1.256131 | -2.828517 |
| C  | -6.685423 | -1.027240 | -3.492155 |
| H  | -6.980349 | -0.329886 | -1.451371 |
| C  | -4.399433 | -1.596689 | -4.117694 |
| H  | -2.891534 | -1.323838 | -2.566629 |
| C  | -5.762117 | -1.482975 | -4.450129 |
| H  | -7.750497 | -0.929925 | -3.754264 |
| H  | -3.673862 | -1.943024 | -4.870249 |
| H  | -6.104778 | -1.743435 | -5.463742 |
| Au | -2.087344 | 0.350859  | -0.130016 |
| H  | -0.090648 | 2.763406  | -1.058242 |
| H  | 0.166688  | 1.230540  | -2.070776 |
| H  | 1.328011  | -0.409126 | 2.032915  |
| P  | 3.356235  | -1.843491 | -0.247340 |
| C  | 2.212752  | 4.234938  | -2.761756 |
| C  | 2.210673  | 5.174964  | -1.676505 |
| C  | 2.295603  | 2.869386  | -2.520256 |
| C  | 2.312602  | 4.645204  | -0.348425 |
| C  | 2.350047  | 2.309294  | -1.197631 |
| H  | 2.287134  | 2.186927  | -3.386573 |
| C  | 2.393260  | 3.274348  | -0.129565 |
| H  | 2.335377  | 5.316377  | 0.520464  |
| H  | 2.473502  | 2.920574  | 0.909784  |
| C  | 4.013724  | -2.139889 | 1.441792  |
| C  | 4.360627  | -3.438736 | 1.875456  |
| C  | 4.124923  | -1.048846 | 2.331871  |
| C  | 4.799968  | -3.642864 | 3.193622  |
| H  | 4.294622  | -4.290854 | 1.180338  |
| C  | 4.561360  | -1.261081 | 3.650834  |
| H  | 3.866817  | -0.033200 | 1.990450  |
| C  | 4.896537  | -2.556322 | 4.083343  |
| H  | 5.073447  | -4.655971 | 3.527470  |
| H  | 4.650557  | -0.405461 | 4.338754  |
| H  | 5.244831  | -2.720571 | 5.115146  |
| C  | 4.279083  | -2.951420 | -1.375840 |
| C  | 3.888445  | -4.291006 | -1.596299 |
| C  | 5.429714  | -2.436419 | -2.012838 |
| C  | 4.656691  | -5.111528 | -2.439240 |
| H  | 2.977795  | -4.687321 | -1.118847 |
| C  | 6.194707  | -3.264295 | -2.850594 |
| H  | 5.716763  | -1.383709 | -1.854059 |
| C  | 5.809913  | -4.600868 | -3.062625 |
| H  | 4.351316  | -6.155361 | -2.612420 |
| H  | 7.091499  | -2.861761 | -3.346713 |
| H  | 6.408284  | -5.246809 | -3.724066 |
| C  | 1.629547  | -2.499115 | -0.212324 |
| C  | 0.973260  | -2.841715 | 0.988175  |
| C  | 0.901377  | -2.485153 | -1.426273 |
| C  | -0.399608 | -3.150331 | 0.975132  |
| H  | 1.532004  | -2.858250 | 1.937146  |
| C  | -0.461885 | -2.814534 | -1.434055 |
| H  | 1.405905  | -2.202337 | -2.364735 |
| C  | -1.119349 | -3.137345 | -0.231180 |
| H  | -0.916840 | -3.399086 | 1.914120  |
| H  | -1.018143 | -2.813621 | -2.384406 |
| H  | -2.192196 | -3.379722 | -0.230435 |
| Au | 3.066653  | 0.393741  | -0.829772 |
| H  | 2.157596  | 4.586267  | -3.800937 |

---

|   |          |          |           |
|---|----------|----------|-----------|
| N | 2.119176 | 6.525629 | -1.903198 |
| C | 2.048037 | 7.042646 | -3.266416 |
| H | 1.968044 | 8.144224 | -3.236605 |
| H | 2.954519 | 6.782173 | -3.856901 |
| H | 1.158886 | 6.651542 | -3.808666 |
| C | 2.134991 | 7.462785 | -0.784532 |
| H | 3.085807 | 7.406010 | -0.209092 |
| H | 2.031525 | 8.493588 | -1.168631 |
| H | 1.294532 | 7.275844 | -0.080170 |
| C | 2.118403 | 2.213169 | 6.120443  |
| H | 1.608940 | 1.275692 | 6.441138  |
| H | 3.118213 | 1.954065 | 5.701055  |
| H | 2.258246 | 2.866303 | 7.002211  |
| O | 1.332690 | 2.952433 | 5.194512  |

**[(PPh<sub>3</sub>)Au(*para*-aniline-alkene)Au(PPh<sub>3</sub>)]<sup>+</sup> Intermediate anti-Markovnikov**  
-3132.54444487 A.U.

|    |           |           |           |
|----|-----------|-----------|-----------|
| P  | -4.419372 | 0.010575  | -0.454493 |
| H  | 0.260936  | 0.346486  | -0.509388 |
| C  | -0.199580 | 1.353480  | -0.361215 |
| C  | 0.417122  | 2.283456  | -1.431036 |
| C  | 0.338913  | 0.762682  | 2.044152  |
| C  | 0.023191  | 1.744147  | 1.078325  |
| C  | 0.560452  | 1.078574  | 3.397347  |
| C  | -0.091765 | 3.081110  | 1.540213  |
| C  | 0.472794  | 2.421075  | 3.825080  |
| H  | 0.806029  | 0.269396  | 4.100004  |
| C  | 0.133879  | 3.418205  | 2.878806  |
| H  | -0.364193 | 3.879733  | 0.831390  |
| H  | 0.048822  | 4.458275  | 3.228899  |
| C  | -5.708344 | 1.258774  | -0.067655 |
| C  | -6.807426 | 0.972447  | 0.771042  |
| C  | -5.588892 | 2.534648  | -0.662729 |
| C  | -7.785591 | 1.955435  | 1.000111  |
| H  | -6.895300 | -0.015893 | 1.249563  |
| C  | -6.572522 | 3.509876  | -0.433072 |
| H  | -4.716925 | 2.760834  | -1.298807 |
| C  | -7.671282 | 3.220859  | 0.397036  |
| H  | -8.641286 | 1.731605  | 1.656285  |
| H  | -6.476862 | 4.503671  | -0.897669 |
| H  | -8.438678 | 3.988968  | 0.581292  |
| C  | -4.536225 | -1.218620 | 0.914436  |
| C  | -5.177828 | -2.467148 | 0.775687  |
| C  | -3.935253 | -0.872025 | 2.147326  |
| C  | -5.226662 | -3.355726 | 1.866369  |
| H  | -5.639024 | -2.749637 | -0.183520 |
| C  | -3.995787 | -1.758267 | 3.233427  |
| H  | -3.407726 | 0.091003  | 2.249584  |
| C  | -4.641692 | -3.001818 | 3.095422  |
| H  | -5.727923 | -4.329750 | 1.752993  |
| H  | -3.528171 | -1.479657 | 4.190599  |
| H  | -4.685830 | -3.698781 | 3.947017  |
| C  | -5.025967 | -0.864695 | -1.951265 |
| C  | -6.405006 | -1.037261 | -2.203816 |
| C  | -4.077532 | -1.399709 | -2.850992 |
| C  | -6.825507 | -1.754788 | -3.336198 |
| H  | -7.150746 | -0.603635 | -1.518580 |
| C  | -4.503693 | -2.119262 | -3.979923 |
| H  | -3.003015 | -1.228816 | -2.670805 |
| C  | -5.877409 | -2.299862 | -4.221548 |
| H  | -7.901568 | -1.884773 | -3.531158 |
| H  | -3.760124 | -2.531639 | -4.679870 |
| H  | -6.211825 | -2.858843 | -5.109535 |
| Au | -2.228216 | 0.830417  | -0.552115 |
| H  | 0.030062  | 3.320287  | -1.326942 |
| H  | 0.078988  | 1.943096  | -2.431008 |
| H  | 0.393195  | -0.290300 | 1.728825  |
| P  | 2.884541  | -1.822444 | 0.127610  |
| C  | 3.990413  | 2.575141  | -2.887494 |
| C  | 4.726614  | 3.195875  | -1.827160 |
| C  | 2.664847  | 2.173906  | -2.706060 |
| C  | 4.049786  | 3.364260  | -0.575371 |
| C  | 1.955076  | 2.349682  | -1.463161 |
| H  | 2.118935  | 1.746126  | -3.562965 |



---

|    |           |           |           |
|----|-----------|-----------|-----------|
| C  | 2.724007  | 2.960389  | -0.402928 |
| H  | 4.562299  | 3.824519  | 0.279011  |
| H  | 2.228904  | 3.152694  | 0.560961  |
| C  | 3.782331  | -1.865109 | 1.723999  |
| C  | 4.588518  | -2.964872 | 2.087211  |
| C  | 3.599667  | -0.789616 | 2.623347  |
| C  | 5.202788  | -2.988647 | 3.351705  |
| H  | 4.740280  | -3.799962 | 1.385209  |
| C  | 4.209279  | -0.828019 | 3.886814  |
| H  | 2.970745  | 0.071001  | 2.341675  |
| C  | 5.011280  | -1.925595 | 4.252260  |
| H  | 5.835580  | -3.844612 | 3.633424  |
| H  | 4.060100  | 0.009849  | 4.586010  |
| H  | 5.494621  | -1.949769 | 5.241472  |
| C  | 3.675282  | -3.047508 | -0.973859 |
| C  | 3.253856  | -4.395279 | -0.975939 |
| C  | 4.749785  | -2.636744 | -1.792831 |
| C  | 3.915386  | -5.328122 | -1.792569 |
| H  | 2.407765  | -4.710924 | -0.344820 |
| C  | 5.408074  | -3.576555 | -2.601646 |
| H  | 5.059485  | -1.578401 | -1.797961 |
| C  | 4.991552  | -4.920917 | -2.601670 |
| H  | 3.586076  | -6.378824 | -1.798212 |
| H  | 6.245688  | -3.257786 | -3.241286 |
| H  | 5.505487  | -5.654872 | -3.241839 |
| C  | 1.189765  | -2.433766 | 0.486752  |
| C  | 0.835174  | -2.922631 | 1.762755  |
| C  | 0.202614  | -2.298950 | -0.516959 |
| C  | -0.503744 | -3.258712 | 2.030483  |
| H  | 1.597459  | -3.017371 | 2.551613  |
| C  | -1.130145 | -2.636437 | -0.238700 |
| H  | 0.473245  | -1.899072 | -1.507746 |
| C  | -1.486326 | -3.110722 | 1.036826  |
| H  | -0.784230 | -3.627279 | 3.029321  |
| H  | -1.901596 | -2.513241 | -1.013262 |
| H  | -2.535766 | -3.354780 | 1.257745  |
| Au | 2.677252  | 0.293640  | -0.732628 |
| H  | 4.454821  | 2.404390  | -3.867070 |
| N  | 6.025131  | 3.604442  | -1.999737 |
| C  | 6.670914  | 3.467288  | -3.301222 |
| H  | 7.704958  | 3.851252  | -3.239399 |
| H  | 6.723834  | 2.403928  | -3.624424 |
| H  | 6.139936  | 4.043033  | -4.092144 |
| C  | 6.740252  | 4.259633  | -0.908875 |
| H  | 6.800097  | 3.608172  | -0.009448 |
| H  | 7.773234  | 4.483150  | -1.230581 |
| H  | 6.259759  | 5.218684  | -0.611509 |
| C  | 1.018180  | 1.892452  | 6.092791  |
| H  | 0.212488  | 1.133640  | 6.228162  |
| H  | 1.969203  | 1.358976  | 5.855153  |
| H  | 1.148412  | 2.449133  | 7.040191  |
| O  | 0.685801  | 2.852132  | 5.103338  |

**[(PPh<sub>3</sub>)Au(*para*-aniline-alkene)] anti-Markovnikov**

-1960.98069808 A.U.

|   |           |           |           |
|---|-----------|-----------|-----------|
| P | 2.908676  | -0.257185 | -0.031186 |
| H | -1.812668 | -0.936164 | -1.262445 |
| C | -1.522544 | -0.561214 | -0.254827 |
| C | -2.178899 | -1.509499 | 0.794822  |
| C | -2.737895 | 1.502178  | -1.142168 |
| C | -1.994043 | 0.870035  | -0.125594 |
| C | -3.204595 | 2.825818  | -1.021756 |
| C | -1.739271 | 1.631481  | 1.046687  |
| C | -2.939725 | 3.556449  | 0.154125  |
| H | -3.782614 | 3.266359  | -1.846686 |
| C | -2.200205 | 2.942517  | 1.192197  |
| H | -1.156231 | 1.172308  | 1.862905  |
| H | -1.999815 | 3.525548  | 2.104529  |
| C | 3.643013  | -0.853038 | 1.548337  |
| C | 4.716223  | -0.197999 | 2.189596  |
| C | 3.103519  | -2.031032 | 2.112296  |
| C | 5.252353  | -0.727062 | 3.376702  |
| H | 5.129417  | 0.729602  | 1.762660  |
| C | 3.646464  | -2.557400 | 3.295573  |

---

|    |           |           |           |
|----|-----------|-----------|-----------|
| H  | 2.247402  | -2.524256 | 1.622309  |
| C  | 4.721889  | -1.907140 | 3.928219  |
| H  | 6.088300  | -0.211100 | 3.875229  |
| H  | 3.220765  | -3.475060 | 3.731238  |
| H  | 5.142611  | -2.317296 | 4.860024  |
| C  | 3.379425  | 1.521333  | -0.136294 |
| C  | 4.623928  | 1.939084  | -0.657467 |
| C  | 2.456518  | 2.484794  | 0.330867  |
| C  | 4.946325  | 3.306545  | -0.695594 |
| H  | 5.338152  | 1.193685  | -1.042653 |
| C  | 2.786058  | 3.849591  | 0.291152  |
| H  | 1.469493  | 2.165323  | 0.706452  |
| C  | 4.030353  | 4.261918  | -0.219227 |
| H  | 5.917127  | 3.627375  | -1.105762 |
| H  | 2.058269  | 4.594223  | 0.649932  |
| H  | 4.283429  | 5.333463  | -0.255807 |
| C  | 3.912707  | -1.070641 | -1.342106 |
| C  | 5.168100  | -1.665025 | -1.091927 |
| C  | 3.383442  | -1.076928 | -2.652627 |
| C  | 5.890420  | -2.249223 | -2.147591 |
| H  | 5.579630  | -1.675729 | -0.070153 |
| C  | 4.112327  | -1.656211 | -3.703348 |
| H  | 2.391309  | -0.633329 | -2.840173 |
| C  | 5.366789  | -2.242835 | -3.452537 |
| H  | 6.868725  | -2.714344 | -1.947054 |
| H  | 3.694055  | -1.658089 | -4.722263 |
| H  | 5.934588  | -2.703415 | -4.276493 |
| Au | 0.580501  | -0.543822 | -0.180231 |
| H  | -1.944179 | -1.154451 | 1.821706  |
| H  | -1.725709 | -2.519606 | 0.703931  |
| H  | -2.974387 | 0.936157  | -2.058071 |
| C  | -5.632531 | -2.655901 | -0.464401 |
| C  | -6.518608 | -1.689984 | 0.093036  |
| C  | -4.255177 | -2.601299 | -0.207223 |
| C  | -5.938537 | -0.670948 | 0.902145  |
| C  | -3.680266 | -1.603067 | 0.605728  |
| H  | -3.601636 | -3.366551 | -0.660607 |
| C  | -4.559037 | -0.639356 | 1.145899  |
| H  | -6.565454 | 0.113002  | 1.349125  |
| H  | -4.148815 | 0.174370  | 1.765607  |
| H  | -6.015126 | -3.463488 | -1.103915 |
| N  | -7.892029 | -1.740401 | -0.141980 |
| C  | -8.427544 | -2.721792 | -1.064858 |
| H  | -9.528613 | -2.621214 | -1.113438 |
| H  | -8.027452 | -2.607732 | -2.102502 |
| H  | -8.203457 | -3.762985 | -0.737322 |
| C  | -8.743240 | -0.669504 | 0.338699  |
| H  | -8.479715 | 0.325096  | -0.098123 |
| H  | -9.795700 | -0.887701 | 0.074920  |
| H  | -8.693002 | -0.567276 | 1.446951  |
| C  | -4.107289 | 5.498394  | -0.612256 |
| H  | -3.547207 | 5.596638  | -1.572389 |
| H  | -5.068887 | 4.971851  | -0.819890 |
| H  | -4.332386 | 6.511779  | -0.226319 |
| O  | -3.346054 | 4.845913  | 0.387342  |

### Using CH<sub>2</sub>=CMePh as alkene:

|                                              |           |           |           |
|----------------------------------------------|-----------|-----------|-----------|
| [(PPh <sub>3</sub> )Au(alkene)] <sup>+</sup> |           |           |           |
| -1520.24655048 A.U.                          |           |           |           |
| P                                            | 1.187372  | 0.135629  | 0.024695  |
| H                                            | -2.152673 | -3.384497 | -1.405906 |
| C                                            | -2.404087 | -2.312360 | -1.349603 |
| C                                            | -2.922595 | -1.792372 | -0.150418 |
| C                                            | -3.817004 | 0.338042  | -1.214376 |
| C                                            | -3.508237 | -0.421772 | -0.055067 |
| C                                            | -4.296409 | 1.648709  | -1.107947 |
| C                                            | -3.720467 | 0.177620  | 1.213476  |
| C                                            | -4.485848 | 2.234030  | 0.159055  |
| H                                            | -4.533706 | 2.217589  | -2.019907 |
| C                                            | -4.200223 | 1.492364  | 1.318182  |
| H                                            | -3.491724 | -0.375784 | 2.134882  |
| H                                            | -4.867436 | 3.263778  | 0.240082  |
| H                                            | -4.352166 | 1.938282  | 2.313044  |

---

|    |           |           |           |
|----|-----------|-----------|-----------|
| C  | 0.715725  | 1.902424  | -0.069683 |
| C  | 1.676000  | 2.880570  | -0.410345 |
| C  | -0.609384 | 2.285571  | 0.239759  |
| C  | 1.307997  | 4.236496  | -0.433763 |
| H  | 2.706109  | 2.583502  | -0.663098 |
| C  | -0.965924 | 3.642509  | 0.214717  |
| H  | -1.369388 | 1.527445  | 0.492323  |
| C  | -0.009335 | 4.618190  | -0.121192 |
| H  | 2.055463  | 4.998804  | -0.702664 |
| H  | -2.001230 | 3.932790  | 0.450703  |
| H  | -0.293106 | 5.681828  | -0.146198 |
| C  | 2.637917  | -0.096376 | -1.061712 |
| C  | 3.948191  | -0.052155 | -0.537770 |
| C  | 2.430021  | -0.271205 | -2.448446 |
| C  | 5.045929  | -0.178005 | -1.406463 |
| H  | 4.110652  | 0.074338  | 0.544224  |
| C  | 3.532763  | -0.394522 | -3.307572 |
| H  | 1.405464  | -0.312218 | -2.854603 |
| C  | 4.839821  | -0.347593 | -2.787050 |
| H  | 6.068557  | -0.146747 | -0.999795 |
| H  | 3.372048  | -0.533490 | -4.387781 |
| H  | 5.703249  | -0.450106 | -3.462575 |
| C  | 1.748778  | -0.190597 | 1.734725  |
| C  | 2.013486  | 0.862360  | 2.635762  |
| C  | 1.947794  | -1.533840 | 2.128397  |
| C  | 2.481632  | 0.566017  | 3.928248  |
| H  | 1.854298  | 1.908717  | 2.331604  |
| C  | 2.420216  | -1.818583 | 3.418335  |
| H  | 1.735826  | -2.354446 | 1.422624  |
| C  | 2.686156  | -0.768972 | 4.318656  |
| H  | 2.687911  | 1.386044  | 4.633375  |
| H  | 2.578578  | -2.864094 | 3.724941  |
| H  | 3.052278  | -0.995050 | 5.332192  |
| Au | -0.630641 | -1.184960 | -0.537988 |
| H  | -2.556616 | -1.805405 | -2.317026 |
| H  | -3.689890 | -0.100785 | -2.214758 |
| C  | -2.985607 | -2.684960 | 1.070263  |
| H  | -2.485890 | -2.231792 | 1.949826  |
| H  | -4.050008 | -2.841290 | 1.347842  |
| H  | -2.520422 | -3.669559 | 0.878278  |

**[(PPh<sub>3</sub>)Au(alkene)(*para*-aniline)]<sup>+</sup>**  
-1886.24304009 A.U.

|   |           |           |           |
|---|-----------|-----------|-----------|
| P | -0.055037 | 0.913010  | -0.180609 |
| H | 1.418305  | -3.839154 | -1.277351 |
| C | 1.746213  | -3.138405 | -0.491378 |
| C | 2.604263  | -2.073849 | -0.843325 |
| C | 3.724550  | -1.884045 | 1.428145  |
| C | 3.403415  | -1.320350 | 0.168104  |
| C | 4.439468  | -1.145152 | 2.383184  |
| C | 3.838277  | 0.000413  | -0.107527 |
| C | 4.843025  | 0.173316  | 2.103188  |
| H | 4.691977  | -1.606719 | 3.350562  |
| C | 4.538696  | 0.741504  | 0.853350  |
| H | 3.589325  | 0.471480  | -1.068671 |
| H | 5.398094  | 0.754000  | 2.855973  |
| H | 4.843580  | 1.774085  | 0.623686  |
| C | 0.446534  | 1.527557  | 1.475549  |
| C | 0.071051  | 2.819164  | 1.915724  |
| C | 1.281376  | 0.729181  | 2.285954  |
| C | 0.528688  | 3.296739  | 3.154291  |
| H | -0.580091 | 3.451075  | 1.291821  |
| C | 1.737169  | 1.214309  | 3.522467  |
| H | 1.591286  | -0.272304 | 1.947633  |
| C | 1.360675  | 2.495806  | 3.959148  |
| H | 0.233486  | 4.301977  | 3.493242  |
| H | 2.393352  | 0.583084  | 4.140781  |
| H | 1.714758  | 2.874098  | 4.930870  |
| C | -1.708239 | 1.665561  | -0.477018 |
| C | -2.034065 | 2.262782  | -1.713814 |
| C | -2.652997 | 1.674276  | 0.573828  |
| C | -3.288909 | 2.870232  | -1.891724 |
| H | -1.302845 | 2.279295  | -2.536212 |
| C | -3.891097 | 2.309266  | 0.398063  |

|    |           |           |           |
|----|-----------|-----------|-----------|
| H  | -2.410447 | 1.201497  | 1.538458  |
| C  | -4.214608 | 2.905519  | -0.834392 |
| H  | -3.533694 | 3.338883  | -2.857539 |
| H  | -4.610352 | 2.338795  | 1.230674  |
| H  | -5.186956 | 3.404707  | -0.967945 |
| C  | 1.078006  | 1.738762  | -1.377171 |
| C  | 1.913373  | 2.811440  | -1.001755 |
| C  | 1.147187  | 1.225189  | -2.692498 |
| C  | 2.814242  | 3.355922  | -1.933541 |
| H  | 1.881511  | 3.205937  | 0.024850  |
| C  | 2.038315  | 1.783216  | -3.623743 |
| H  | 0.513862  | 0.369431  | -2.981500 |
| C  | 2.879649  | 2.844870  | -3.241952 |
| H  | 3.472964  | 4.185200  | -1.631958 |
| H  | 2.085432  | 1.379238  | -4.647018 |
| H  | 3.589065  | 3.273441  | -3.966750 |
| Au | 0.322501  | -1.402111 | -0.385209 |
| H  | 1.721234  | -3.532215 | 0.539095  |
| H  | 3.433152  | -2.920150 | 1.657030  |
| C  | -3.512288 | -1.630246 | -0.930631 |
| C  | -3.872861 | -1.330650 | 0.422741  |
| C  | -2.431541 | -2.461720 | -1.216282 |
| C  | -3.025365 | -1.833737 | 1.461677  |
| C  | -1.624105 | -3.008895 | -0.178746 |
| H  | -2.215980 | -2.721194 | -2.264735 |
| C  | -1.945450 | -2.665837 | 1.164856  |
| H  | -3.239929 | -1.609103 | 2.514401  |
| H  | -0.959193 | -3.859862 | -0.388234 |
| H  | -1.351472 | -3.089299 | 1.990127  |
| H  | -4.103892 | -1.229727 | -1.763368 |
| N  | -5.001940 | -0.602579 | 0.712085  |
| C  | -5.914351 | -0.213476 | -0.357255 |
| H  | -6.756156 | 0.359043  | 0.072089  |
| H  | -5.411201 | 0.441538  | -1.101273 |
| H  | -6.332657 | -1.098070 | -0.888079 |
| C  | -5.378485 | -0.360717 | 2.098397  |
| H  | -4.578179 | 0.179724  | 2.651136  |
| H  | -6.287955 | 0.266133  | 2.128063  |
| H  | -5.594521 | -1.305433 | 2.647260  |
| C  | 2.921670  | -1.833356 | -2.303531 |
| H  | 2.896303  | -0.760375 | -2.571939 |
| H  | 3.955549  | -2.190822 | -2.502700 |
| H  | 2.224930  | -2.376100 | -2.970701 |

**[(PPh<sub>3</sub>)Au(alkene)(*ortho*-aniline)]<sup>+</sup>**

-1886.24727203 A.U.

|   |           |           |           |
|---|-----------|-----------|-----------|
| P | -0.269129 | 1.071095  | 0.014700  |
| H | 0.763152  | -3.330107 | -2.316084 |
| C | 1.244387  | -2.880402 | -1.431467 |
| C | 2.110196  | -1.775965 | -1.611291 |
| C | 3.404556  | -2.156738 | 0.547649  |
| C | 3.032265  | -1.311093 | -0.528052 |
| C | 4.217766  | -1.681759 | 1.587602  |
| C | 3.515712  | 0.022225  | -0.528642 |
| C | 4.672334  | -0.350340 | 1.581284  |
| H | 4.506289  | -2.360565 | 2.405288  |
| C | 4.316293  | 0.498135  | 0.518060  |
| H | 3.225211  | 0.712139  | -1.333371 |
| H | 5.305334  | 0.022936  | 2.400911  |
| H | 4.659279  | 1.544033  | 0.504590  |
| C | 0.423497  | 1.375250  | 1.684345  |
| C | 0.201016  | 2.602305  | 2.354285  |
| C | 1.254680  | 0.398638  | 2.273550  |
| C | 0.793502  | 2.834724  | 3.605722  |
| H | -0.438331 | 3.375366  | 1.899999  |
| C | 1.846786  | 0.639814  | 3.523586  |
| H | 1.452628  | -0.551679 | 1.753692  |
| C | 1.614040  | 1.853252  | 4.193064  |
| H | 0.613781  | 3.788812  | 4.125180  |
| H | 2.496766  | -0.128029 | 3.970071  |
| H | 2.074730  | 2.039028  | 5.175892  |
| C | -1.944295 | 1.841510  | 0.001402  |
| C | -2.489507 | 2.337342  | -1.204055 |
| C | -2.713497 | 1.904447  | 1.185408  |

---

|    |           |           |           |
|----|-----------|-----------|-----------|
| C  | -3.781835 | 2.888824  | -1.221472 |
| H  | -1.903232 | 2.316743  | -2.134775 |
| C  | -4.000268 | 2.468537  | 1.163596  |
| H  | -2.304282 | 1.520377  | 2.130386  |
| C  | -4.539073 | 2.959851  | -0.038213 |
| H  | -4.193143 | 3.277807  | -2.165820 |
| H  | -4.583648 | 2.525439  | 2.095895  |
| H  | -5.546680 | 3.403314  | -0.052548 |
| C  | 0.740383  | 2.092329  | -1.146075 |
| C  | 1.640880  | 3.081369  | -0.697453 |
| C  | 0.643811  | 1.814631  | -2.528851 |
| C  | 2.430190  | 3.783342  | -1.625280 |
| H  | 1.748282  | 3.290050  | 0.377278  |
| C  | 1.420001  | 2.532492  | -3.453106 |
| H  | -0.022424 | 1.008918  | -2.880723 |
| C  | 2.319955  | 3.515062  | -3.001155 |
| H  | 3.139205  | 4.546104  | -1.267477 |
| H  | 1.334754  | 2.311324  | -4.528435 |
| H  | 2.940503  | 4.068273  | -3.722983 |
| Au | 0.026023  | -1.176953 | -0.629358 |
| H  | 1.345653  | -3.545428 | -0.559456 |
| H  | 3.071534  | -3.205419 | 0.565044  |
| C  | -1.606265 | -2.796646 | 0.446479  |
| C  | -2.770223 | -1.944160 | 0.459508  |
| C  | -0.799321 | -2.929173 | 1.612937  |
| C  | -3.032440 | -1.219377 | 1.663503  |
| C  | -1.061835 | -2.183645 | 2.763572  |
| H  | 0.046737  | -3.633876 | 1.588476  |
| C  | -2.193856 | -1.338283 | 2.772802  |
| H  | -3.904406 | -0.557920 | 1.724747  |
| H  | -0.416732 | -2.266027 | 3.649847  |
| H  | -2.428199 | -0.756591 | 3.678680  |
| H  | -1.477574 | -3.533026 | -0.359598 |
| N  | -3.577535 | -1.829207 | -0.647622 |
| C  | -3.132853 | -2.395209 | -1.909550 |
| H  | -3.869366 | -2.169008 | -2.700937 |
| H  | -2.140631 | -1.970380 | -2.216425 |
| H  | -3.021541 | -3.499505 | -1.856567 |
| C  | -4.676323 | -0.866787 | -0.657390 |
| H  | -4.315650 | 0.184383  | -0.600157 |
| H  | -5.255923 | -0.987283 | -1.590564 |
| H  | -5.372173 | -1.046224 | 0.188189  |
| C  | 2.297467  | -1.198123 | -2.995837 |
| H  | 2.358723  | -0.094536 | -2.995940 |
| H  | 3.261765  | -1.575963 | -3.401197 |
| H  | 1.484680  | -1.504420 | -3.681780 |

**[(PPh<sub>3</sub>)Au(*para*-aniline)+(PPh<sub>3</sub>)Au(alkene)]<sup>+</sup> adduct**  
-3057.36962520 A.U.

|   |           |           |           |
|---|-----------|-----------|-----------|
| P | -4.087940 | -0.666735 | 0.050665  |
| H | 0.597909  | -0.024522 | 0.835360  |
| C | 0.029210  | 0.922892  | 0.823861  |
| C | 0.156791  | 1.707170  | -0.359471 |
| C | -0.580148 | 3.843026  | 0.756900  |
| C | -0.123697 | 3.140347  | -0.396818 |
| C | -0.859645 | 5.210220  | 0.710192  |
| C | 0.063174  | 3.893832  | -1.590076 |
| C | -0.655832 | 5.936444  | -0.480568 |
| H | -1.229126 | 5.721632  | 1.612475  |
| C | -0.208115 | 5.266390  | -1.633397 |
| H | 0.432068  | 3.400955  | -2.499762 |
| H | -0.866307 | 7.016495  | -0.513483 |
| H | -0.057648 | 5.820624  | -2.572613 |
| C | -5.244886 | 0.527272  | -0.720119 |
| C | -6.258525 | 0.098838  | -1.606416 |
| C | -5.128268 | 1.895366  | -0.388004 |
| C | -7.156640 | 1.036333  | -2.143472 |
| H | -6.337946 | -0.963669 | -1.886645 |
| C | -6.031311 | 2.825296  | -0.928050 |
| H | -4.321944 | 2.230726  | 0.285280  |
| C | -7.045912 | 2.396756  | -1.803386 |
| H | -7.945583 | 0.701816  | -2.835001 |
| H | -5.937061 | 3.891395  | -0.669600 |
| H | -7.750044 | 3.128435  | -2.229386 |

---

|    |           |           |           |
|----|-----------|-----------|-----------|
| C  | -4.906669 | -1.316384 | 1.556170  |
| C  | -6.297094 | -1.566504 | 1.569810  |
| C  | -4.127241 | -1.609331 | 2.697285  |
| C  | -6.896110 | -2.117807 | 2.713892  |
| H  | -6.913602 | -1.323528 | 0.690001  |
| C  | -4.733385 | -2.162684 | 3.837733  |
| H  | -3.045856 | -1.395390 | 2.691986  |
| C  | -6.115871 | -2.419122 | 3.845775  |
| H  | -7.980410 | -2.309050 | 2.723539  |
| H  | -4.123876 | -2.386944 | 4.726901  |
| H  | -6.590555 | -2.848553 | 4.741788  |
| C  | -3.991833 | -2.076183 | -1.122117 |
| C  | -3.476035 | -1.819382 | -2.413478 |
| C  | -4.331687 | -3.392162 | -0.748519 |
| C  | -3.309909 | -2.873064 | -3.324403 |
| H  | -3.200852 | -0.791125 | -2.700842 |
| C  | -4.149080 | -4.446269 | -1.662527 |
| H  | -4.734942 | -3.597122 | 0.255491  |
| C  | -3.640554 | -4.189630 | -2.947537 |
| H  | -2.913445 | -2.669086 | -4.331194 |
| H  | -4.409818 | -5.474226 | -1.366608 |
| H  | -3.501215 | -5.017584 | -3.659854 |
| Au | -1.966914 | 0.196646  | 0.433453  |
| H  | 0.023167  | 1.438454  | 1.799127  |
| H  | -0.740571 | 3.299607  | 1.698473  |
| P  | 3.288316  | -2.009320 | -0.018632 |
| C  | 3.072491  | 4.557493  | -0.814595 |
| C  | 2.576636  | 5.187742  | 0.365717  |
| C  | 3.366400  | 3.188662  | -0.827423 |
| C  | 2.446470  | 4.373800  | 1.531373  |
| C  | 3.186802  | 2.355212  | 0.307273  |
| H  | 3.745756  | 2.756218  | -1.768855 |
| C  | 2.743151  | 3.006963  | 1.488105  |
| H  | 2.106151  | 4.809989  | 2.480223  |
| H  | 2.611066  | 2.423474  | 2.414335  |
| C  | 4.309987  | -3.054493 | 1.087033  |
| C  | 3.898951  | -4.341623 | 1.501899  |
| C  | 5.561379  | -2.547613 | 1.501885  |
| C  | 4.741596  | -5.116059 | 2.316408  |
| H  | 2.915827  | -4.734405 | 1.196572  |
| C  | 6.400642  | -3.329887 | 2.312681  |
| H  | 5.869971  | -1.535174 | 1.192793  |
| C  | 5.992355  | -4.612910 | 2.719210  |
| H  | 4.419047  | -6.118212 | 2.639770  |
| H  | 7.375317  | -2.931397 | 2.634509  |
| H  | 6.649624  | -5.222302 | 3.359104  |
| C  | 3.588934  | -2.606948 | -1.732412 |
| C  | 3.944097  | -3.945458 | -2.006219 |
| C  | 3.408985  | -1.697377 | -2.798984 |
| C  | 4.109284  | -4.368345 | -3.335590 |
| H  | 4.103149  | -4.656994 | -1.180953 |
| C  | 3.567992  | -2.128460 | -4.126859 |
| H  | 3.153071  | -0.647365 | -2.580095 |
| C  | 3.918087  | -3.463610 | -4.396019 |
| H  | 4.394232  | -5.411409 | -3.544421 |
| H  | 3.430238  | -1.414806 | -4.954280 |
| H  | 4.052613  | -3.798930 | -5.436384 |
| C  | 1.544102  | -2.507544 | 0.335455  |
| C  | 1.089139  | -2.463494 | 1.674728  |
| C  | 0.633314  | -2.816584 | -0.697554 |
| C  | -0.253211 | -2.744973 | 1.973283  |
| H  | 1.792186  | -2.212989 | 2.485735  |
| C  | -0.712430 | -3.089450 | -0.394123 |
| H  | 0.977313  | -2.853834 | -1.743114 |
| C  | -1.156436 | -3.058029 | 0.939614  |
| H  | -0.596385 | -2.719067 | 3.019569  |
| H  | -1.418461 | -3.332311 | -1.201732 |
| H  | -2.208565 | -3.283749 | 1.170087  |
| Au | 3.420987  | 0.320084  | 0.207601  |
| H  | 3.230248  | 5.140234  | -1.732078 |
| N  | 2.219563  | 6.528703  | 0.374754  |
| C  | 2.521272  | 7.361814  | -0.779759 |
| H  | 2.111983  | 8.376233  | -0.617998 |
| H  | 3.616854  | 7.452361  | -0.967872 |

|   |           |           |           |
|---|-----------|-----------|-----------|
| H | 2.049516  | 6.951899  | -1.697925 |
| C | 1.891030  | 7.178587  | 1.634665  |
| H | 2.751426  | 7.195668  | 2.344058  |
| H | 1.580995  | 8.221950  | 1.439646  |
| H | 1.043681  | 6.665429  | 2.136652  |
| C | 0.537207  | 1.000519  | -1.640865 |
| H | 1.474774  | 1.430396  | -2.046749 |
| H | 0.700253  | -0.079016 | -1.463557 |
| H | -0.252212 | 1.119454  | -2.412653 |

[(PPh<sub>3</sub>)Au(*para*-aniline)--(PPh<sub>3</sub>)Au(alkene)]<sup>+</sup> TS Markovnikov

-3057.34845539 A.U.

|    |           |           |           |
|----|-----------|-----------|-----------|
| P  | -3.941777 | -1.235281 | 0.018317  |
| H  | 0.791193  | -0.175441 | 0.789131  |
| C  | -0.004912 | 0.593848  | 0.841021  |
| C  | 0.125047  | 1.586996  | -0.276700 |
| C  | -1.437928 | 3.193240  | 0.951830  |
| C  | -0.830999 | 2.757942  | -0.252801 |
| C  | -2.333499 | 4.273233  | 0.973490  |
| C  | -1.153405 | 3.468985  | -1.433235 |
| C  | -2.640511 | 4.965378  | -0.212595 |
| H  | -2.802010 | 4.571363  | 1.924864  |
| C  | -2.045953 | 4.554284  | -1.417703 |
| H  | -0.700022 | 3.174728  | -2.389604 |
| H  | -3.345609 | 5.811450  | -0.197462 |
| H  | -2.283182 | 5.075380  | -2.358881 |
| C  | -4.813652 | -0.031529 | -1.065335 |
| C  | -5.774290 | -0.450138 | -2.013743 |
| C  | -4.503235 | 1.342796  | -0.940574 |
| C  | -6.427710 | 0.500484  | -2.815888 |
| H  | -5.999464 | -1.521778 | -2.136703 |
| C  | -5.159028 | 2.286511  | -1.747858 |
| H  | -3.733388 | 1.677739  | -0.224938 |
| C  | -6.122984 | 1.867879  | -2.682417 |
| H  | -7.175365 | 0.170475  | -3.554125 |
| H  | -4.899240 | 3.351738  | -1.646771 |
| H  | -6.634448 | 2.608381  | -3.317373 |
| C  | -5.071616 | -1.654703 | 1.400140  |
| C  | -6.473259 | -1.701766 | 1.236885  |
| C  | -4.497491 | -1.978661 | 2.649511  |
| C  | -7.289821 | -2.078022 | 2.315841  |
| H  | -6.928761 | -1.436793 | 0.270090  |
| C  | -5.319645 | -2.360631 | 3.723079  |
| H  | -3.403383 | -1.921887 | 2.776016  |
| C  | -6.715058 | -2.410622 | 3.556680  |
| H  | -8.383117 | -2.109428 | 2.187726  |
| H  | -4.868726 | -2.612283 | 4.695686  |
| H  | -7.359842 | -2.703783 | 4.399989  |
| C  | -3.795464 | -2.769588 | -0.983178 |
| C  | -3.140742 | -2.684943 | -2.234095 |
| C  | -4.191858 | -4.027673 | -0.484561 |
| C  | -2.895226 | -3.848230 | -2.978815 |
| H  | -2.815899 | -1.703972 | -2.617822 |
| C  | -3.930580 | -5.191661 | -1.230894 |
| H  | -4.702050 | -4.100326 | 0.488826  |
| C  | -3.283055 | -5.105178 | -2.475356 |
| H  | -2.393947 | -3.776287 | -3.957035 |
| H  | -4.240508 | -6.171994 | -0.836440 |
| H  | -3.082364 | -6.018010 | -3.057498 |
| Au | -1.848977 | -0.388883 | 0.580223  |
| H  | 0.018652  | 1.043085  | 1.853426  |
| H  | -1.218925 | 2.664994  | 1.889759  |
| P  | 3.915085  | -1.349396 | -0.002172 |
| C  | 1.729065  | 4.836203  | -0.985442 |
| C  | 1.312848  | 5.369151  | 0.284956  |
| C  | 2.007275  | 3.488611  | -1.112973 |
| C  | 1.458480  | 4.520706  | 1.439323  |
| C  | 1.893761  | 2.552030  | -0.017987 |
| H  | 2.256361  | 3.107585  | -2.116862 |
| C  | 1.730139  | 3.177057  | 1.275873  |
| H  | 1.282960  | 4.916842  | 2.448018  |
| H  | 1.723819  | 2.534950  | 2.172232  |
| C  | 4.715804  | -1.888119 | 1.558169  |
| C  | 5.340404  | -3.151110 | 1.659102  |

---

|    |           |           |           |
|----|-----------|-----------|-----------|
| C  | 4.666029  | -1.036479 | 2.683199  |
| C  | 5.903297  | -3.556558 | 2.879413  |
| H  | 5.397241  | -3.816295 | 0.783197  |
| C  | 5.227994  | -1.450383 | 3.903341  |
| H  | 4.190594  | -0.045278 | 2.596376  |
| C  | 5.845811  | -2.709123 | 4.001959  |
| H  | 6.393770  | -4.539642 | 2.954057  |
| H  | 5.189126  | -0.782337 | 4.777813  |
| H  | 6.291417  | -3.030469 | 4.956392  |
| C  | 4.992265  | -1.897116 | -1.376864 |
| C  | 4.942070  | -3.212135 | -1.892226 |
| C  | 5.921659  | -0.970198 | -1.898472 |
| C  | 5.825067  | -3.594423 | -2.915802 |
| H  | 4.204213  | -3.931992 | -1.503370 |
| C  | 6.804274  | -1.361523 | -2.918545 |
| H  | 5.946136  | 0.059194  | -1.503965 |
| C  | 6.756835  | -2.672331 | -3.426674 |
| H  | 5.783785  | -4.618674 | -3.318215 |
| H  | 7.528467  | -0.637356 | -3.322929 |
| H  | 7.446208  | -2.975898 | -4.230014 |
| C  | 2.358113  | -2.332510 | -0.124760 |
| C  | 1.705256  | -2.784208 | 1.042579  |
| C  | 1.708313  | -2.446139 | -1.375943 |
| C  | 0.414177  | -3.334262 | 0.957015  |
| H  | 2.201366  | -2.693804 | 2.021851  |
| C  | 0.421928  | -3.003440 | -1.452196 |
| H  | 2.209149  | -2.091854 | -2.291456 |
| C  | -0.233036 | -3.440907 | -0.286767 |
| H  | -0.093207 | -3.675352 | 1.872543  |
| H  | -0.085569 | -3.085966 | -2.425294 |
| H  | -1.247172 | -3.863249 | -0.355081 |
| Au | 3.136821  | 0.843243  | -0.038704 |
| H  | 1.775752  | 5.482145  | -1.872085 |
| N  | 0.760671  | 6.608668  | 0.384655  |
| C  | 0.524531  | 7.407193  | -0.818566 |
| H  | 0.019525  | 8.348617  | -0.538832 |
| H  | 1.476171  | 7.668616  | -1.328373 |
| H  | -0.126266 | 6.858871  | -1.534001 |
| C  | 0.249265  | 7.087490  | 1.669521  |
| H  | 1.061110  | 7.187745  | 2.421000  |
| H  | -0.210290 | 8.082064  | 1.531040  |
| H  | -0.525017 | 6.396121  | 2.067548  |
| C  | 0.265092  | 0.917699  | -1.648414 |
| H  | 0.739440  | 1.558587  | -2.414109 |
| H  | 0.853946  | -0.013295 | -1.559416 |
| H  | -0.745677 | 0.637310  | -2.016977 |

**[(PPh<sub>3</sub>)Au(*para*-aniline)--(PPh<sub>3</sub>)Au(alkene)]<sup>+</sup> Intermediate Markovnikov**  
-3057.37164960 A.U.

|   |           |           |           |
|---|-----------|-----------|-----------|
| P | 4.786247  | -0.710127 | -0.167666 |
| H | -0.192425 | -0.545896 | -1.085825 |
| C | 0.562143  | 0.260561  | -0.921826 |
| C | 0.161466  | 1.113229  | 0.319075  |
| C | 1.457221  | 3.227033  | -0.332620 |
| C | 1.274129  | 2.162682  | 0.580003  |
| C | 2.499166  | 4.154794  | -0.171944 |
| C | 2.168033  | 2.069324  | 1.669707  |
| C | 3.388652  | 4.040007  | 0.912112  |
| H | 2.618779  | 4.971654  | -0.901447 |
| C | 3.218178  | 2.990810  | 1.829824  |
| H | 2.084384  | 1.249522  | 2.395523  |
| H | 4.213398  | 4.759102  | 1.034671  |
| H | 3.913251  | 2.868121  | 2.674839  |
| C | 5.828570  | 0.541701  | -1.017401 |
| C | 7.129528  | 0.268648  | -1.487912 |
| C | 5.283904  | 1.839349  | -1.156980 |
| C | 7.881895  | 1.292878  | -2.091131 |
| H | 7.555502  | -0.741831 | -1.384737 |
| C | 6.046044  | 2.858061  | -1.747761 |
| H | 4.265020  | 2.054260  | -0.794856 |
| C | 7.344835  | 2.586343  | -2.217844 |
| H | 8.896091  | 1.077145  | -2.462371 |
| H | 5.617206  | 3.867923  | -1.844659 |
| H | 7.939745  | 3.384743  | -2.688754 |



---

|    |           |           |           |
|----|-----------|-----------|-----------|
| C  | 5.631274  | -2.319948 | -0.396753 |
| C  | 6.696175  | -2.729265 | 0.435636  |
| C  | 5.212707  | -3.145088 | -1.463559 |
| C  | 7.340718  | -3.954140 | 0.193847  |
| H  | 7.017150  | -2.089964 | 1.273736  |
| C  | 5.865229  | -4.365743 | -1.703176 |
| H  | 4.370071  | -2.826227 | -2.099450 |
| C  | 6.928378  | -4.770450 | -0.875413 |
| H  | 8.169492  | -4.273690 | 0.845000  |
| H  | 5.537893  | -5.007627 | -2.536013 |
| H  | 7.435235  | -5.730524 | -1.060836 |
| C  | 4.977147  | -0.303725 | 1.621562  |
| C  | 5.950489  | 0.601916  | 2.090585  |
| C  | 4.066513  | -0.884831 | 2.532982  |
| C  | 6.009522  | 0.923834  | 3.458577  |
| H  | 6.653545  | 1.070052  | 1.384293  |
| C  | 4.130072  | -0.561621 | 3.897161  |
| H  | 3.294140  | -1.579912 | 2.163528  |
| C  | 5.099380  | 0.347949  | 4.361864  |
| H  | 6.770129  | 1.634558  | 3.818315  |
| H  | 3.415380  | -1.015805 | 4.601551  |
| H  | 5.144493  | 0.607530  | 5.431218  |
| Au | 2.527452  | -0.440834 | -0.704602 |
| H  | 0.570998  | 0.886998  | -1.841011 |
| H  | 0.778216  | 3.331453  | -1.193701 |
| P  | -4.335215 | -1.331447 | 0.051074  |
| C  | -2.566723 | 3.785652  | 0.950297  |
| C  | -3.069097 | 4.091689  | -0.362932 |
| C  | -1.656943 | 2.759629  | 1.159491  |
| C  | -2.586163 | 3.293210  | -1.438749 |
| C  | -1.149203 | 1.932218  | 0.093585  |
| H  | -1.267431 | 2.601016  | 2.176187  |
| C  | -1.659820 | 2.252507  | -1.215029 |
| H  | -2.912984 | 3.474442  | -2.470255 |
| H  | -1.232402 | 1.739609  | -2.090582 |
| C  | -4.285463 | -2.443783 | -1.403054 |
| C  | -5.458454 | -3.028369 | -1.925895 |
| C  | -3.026512 | -2.742437 | -1.972696 |
| C  | -5.366730 | -3.913660 | -3.014434 |
| H  | -6.440538 | -2.792046 | -1.487027 |
| C  | -2.944967 | -3.630645 | -3.055814 |
| H  | -2.111684 | -2.276532 | -1.569329 |
| C  | -4.114373 | -4.215821 | -3.577392 |
| H  | -6.281749 | -4.368042 | -3.425149 |
| H  | -1.964017 | -3.861856 | -3.499011 |
| H  | -4.048521 | -4.907806 | -4.431436 |
| C  | -6.082149 | -0.835067 | 0.279217  |
| C  | -6.953400 | -1.583522 | 1.100135  |
| C  | -6.563987 | 0.290742  | -0.425343 |
| C  | -8.303384 | -1.206929 | 1.206191  |
| H  | -6.577950 | -2.455272 | 1.658923  |
| C  | -7.914891 | 0.656370  | -0.317554 |
| H  | -5.875917 | 0.880593  | -1.053597 |
| C  | -8.784731 | -0.091697 | 0.497557  |
| H  | -8.982214 | -1.788375 | 1.849199  |
| H  | -8.290631 | 1.532750  | -0.868209 |
| H  | -9.842927 | 0.200058  | 0.585216  |
| C  | -3.889943 | -2.369641 | 1.495023  |
| C  | -4.028569 | -3.773854 | 1.450542  |
| C  | -3.431987 | -1.739540 | 2.674183  |
| C  | -3.716841 | -4.540002 | 2.586998  |
| H  | -4.372361 | -4.268369 | 0.528357  |
| C  | -3.125803 | -2.512366 | 3.805023  |
| H  | -3.308061 | -0.644119 | 2.702044  |
| C  | -3.268197 | -3.911822 | 3.762359  |
| H  | -3.821904 | -5.635453 | 2.550997  |
| H  | -2.767636 | -2.020422 | 4.722648  |
| H  | -3.021712 | -4.516684 | 4.648917  |
| Au | -2.879426 | 0.428205  | -0.164381 |
| H  | -2.891131 | 4.376349  | 1.816987  |
| N  | -3.970297 | 5.107817  | -0.561663 |
| C  | -4.393344 | 5.949873  | 0.553609  |
| H  | -5.130629 | 6.689509  | 0.192857  |
| H  | -4.879863 | 5.353330  | 1.356136  |

---

|   |           |           |           |
|---|-----------|-----------|-----------|
| H | -3.542147 | 6.508639  | 1.003419  |
| C | -4.421497 | 5.425155  | -1.911848 |
| H | -4.901701 | 4.547068  | -2.397545 |
| H | -5.169935 | 6.236766  | -1.868474 |
| H | -3.584982 | 5.764315  | -2.564128 |
| C | -0.022580 | 0.164135  | 1.528664  |
| H | -0.811379 | -0.585387 | 1.306765  |
| H | 0.911317  | -0.399691 | 1.721693  |
| H | -0.307754 | 0.692640  | 2.461009  |

**[(PPh<sub>3</sub>)Au(*para*-aniline-alkene)] Markovnikov**

-1885.82756106 A.U.

|    |           |           |           |
|----|-----------|-----------|-----------|
| P  | 2.602501  | -0.267770 | -0.061142 |
| H  | -1.892228 | -2.527371 | 0.082191  |
| C  | -1.626770 | -1.496373 | -0.241962 |
| C  | -2.398113 | -0.447467 | 0.622941  |
| C  | -2.087177 | 1.533953  | -0.964987 |
| C  | -1.815681 | 0.947159  | 0.293054  |
| C  | -1.503797 | 2.754321  | -1.341166 |
| C  | -0.946782 | 1.639474  | 1.164170  |
| C  | -0.626803 | 3.423433  | -0.465055 |
| H  | -1.733706 | 3.186934  | -2.328648 |
| C  | -0.349563 | 2.856758  | 0.789741  |
| H  | -0.695775 | 1.212747  | 2.144600  |
| H  | -0.157368 | 4.374003  | -0.764227 |
| H  | 0.348445  | 3.350829  | 1.484620  |
| C  | 2.981488  | 0.775768  | -1.528208 |
| C  | 4.257967  | 0.845823  | -2.123860 |
| C  | 1.921044  | 1.560100  | -2.037459 |
| C  | 4.471418  | 1.701635  | -3.219809 |
| H  | 5.085084  | 0.231857  | -1.733454 |
| C  | 2.145404  | 2.420262  | -3.122830 |
| H  | 0.920340  | 1.502467  | -1.578379 |
| C  | 3.419437  | 2.491652  | -3.717087 |
| H  | 5.468116  | 1.751260  | -3.686547 |
| H  | 1.313949  | 3.032670  | -3.506152 |
| H  | 3.592215  | 3.161497  | -4.574517 |
| C  | 4.061036  | -1.364769 | 0.146209  |
| C  | 5.225740  | -0.959843 | 0.834066  |
| C  | 3.998383  | -2.652532 | -0.430438 |
| C  | 6.320822  | -1.835118 | 0.933724  |
| H  | 5.271124  | 0.039627  | 1.295634  |
| C  | 5.098544  | -3.520543 | -0.333595 |
| H  | 3.076323  | -2.970441 | -0.945210 |
| C  | 6.259778  | -3.112951 | 0.348135  |
| H  | 7.226797  | -1.517885 | 1.474255  |
| H  | 5.044852  | -4.524287 | -0.783869 |
| H  | 7.118948  | -3.797497 | 0.430412  |
| C  | 2.691459  | 0.924324  | 1.344935  |
| C  | 3.283847  | 2.198367  | 1.222390  |
| C  | 2.083034  | 0.551874  | 2.564530  |
| C  | 3.266899  | 3.089194  | 2.310226  |
| H  | 3.742407  | 2.503312  | 0.268704  |
| C  | 2.069001  | 1.444017  | 3.647859  |
| H  | 1.592586  | -0.431967 | 2.650076  |
| C  | 2.657904  | 2.716156  | 3.521350  |
| H  | 3.724222  | 4.085902  | 2.205811  |
| H  | 1.582333  | 1.150459  | 4.591307  |
| H  | 2.635575  | 3.420751  | 4.367757  |
| Au | 0.438680  | -1.153286 | -0.173427 |
| H  | -1.934983 | -1.403289 | -1.308039 |
| H  | -2.773624 | 1.017350  | -1.654505 |
| C  | -6.105103 | 0.666942  | 0.597803  |
| C  | -6.779114 | -0.398782 | -0.067046 |
| C  | -4.719356 | 0.632365  | 0.791465  |
| C  | -5.974223 | -1.478190 | -0.526409 |
| C  | -3.917252 | -0.439488 | 0.339154  |
| H  | -4.239152 | 1.483579  | 1.301873  |
| C  | -4.585621 | -1.488371 | -0.321044 |
| H  | -6.427408 | -2.327525 | -1.056100 |
| H  | -4.013166 | -2.349117 | -0.697415 |
| H  | -6.663404 | 1.538868  | 0.965954  |
| N  | -8.158026 | -0.380532 | -0.260928 |
| C  | -8.923825 | 0.790248  | 0.121673  |

---

|   |           |           |           |
|---|-----------|-----------|-----------|
| H | -9.995359 | 0.617308  | -0.094049 |
| H | -8.834834 | 1.005793  | 1.211160  |
| H | -8.609435 | 1.712043  | -0.426251 |
| C | -8.787851 | -1.428800 | -1.040564 |
| H | -8.624487 | -2.434796 | -0.590280 |
| H | -9.880328 | -1.256488 | -1.077089 |
| H | -8.412706 | -1.471251 | -2.092367 |
| C | -2.218067 | -0.810975 | 2.118470  |
| H | -2.691310 | -1.794164 | 2.314583  |
| H | -1.143050 | -0.896753 | 2.384744  |
| H | -2.696699 | -0.064279 | 2.785488  |

**[(PPh<sub>3</sub>)Au(*ortho*-aniline)+(PPh<sub>3</sub>)Au(alkene)]<sup>+</sup> adduct**

-3057.36942021 A.U.

|    |           |           |           |
|----|-----------|-----------|-----------|
| P  | 3.672963  | -0.964685 | 0.068876  |
| H  | -1.001250 | 0.680438  | -0.121026 |
| C  | -0.159467 | 1.314576  | -0.459152 |
| C  | 0.321687  | 2.271090  | 0.462063  |
| C  | 1.872852  | 3.414051  | -1.190939 |
| C  | 1.174680  | 3.413157  | 0.046702  |
| C  | 2.661437  | 4.505287  | -1.574452 |
| C  | 1.307167  | 4.547696  | 0.887478  |
| C  | 2.768193  | 5.630625  | -0.733774 |
| H  | 3.202443  | 4.475623  | -2.532987 |
| C  | 2.087039  | 5.645904  | 0.495950  |
| H  | 0.759140  | 4.595585  | 1.838533  |
| H  | 3.385096  | 6.491242  | -1.036065 |
| H  | 2.161082  | 6.523054  | 1.157131  |
| C  | 4.914276  | -0.015790 | -0.895398 |
| C  | 5.920264  | -0.660345 | -1.647326 |
| C  | 4.867229  | 1.395782  | -0.840056 |
| C  | 6.875173  | 0.108985  | -2.335233 |
| H  | 5.952694  | -1.759992 | -1.704161 |
| C  | 5.824547  | 2.155528  | -1.528890 |
| H  | 4.074247  | 1.904301  | -0.266674 |
| C  | 6.829551  | 1.513359  | -2.276341 |
| H  | 7.657974  | -0.394014 | -2.924027 |
| H  | 5.777705  | 3.254824  | -1.484886 |
| H  | 7.578176  | 2.110445  | -2.820044 |
| C  | 3.640611  | -2.644908 | -0.657881 |
| C  | 4.018149  | -3.791870 | 0.068904  |
| C  | 3.135620  | -2.773488 | -1.972365 |
| C  | 3.882907  | -5.063591 | -0.517415 |
| H  | 4.408136  | -3.696879 | 1.093942  |
| C  | 3.013671  | -4.043821 | -2.554259 |
| H  | 2.828288  | -1.876221 | -2.534824 |
| C  | 3.381330  | -5.191276 | -1.824488 |
| H  | 4.172045  | -5.959600 | 0.053353  |
| H  | 2.621832  | -4.141316 | -3.578537 |
| H  | 3.276152  | -6.188908 | -2.278382 |
| C  | 4.354840  | -1.112784 | 1.761993  |
| C  | 5.718801  | -1.434155 | 1.947889  |
| C  | 3.519319  | -0.907971 | 2.880972  |
| C  | 6.232100  | -1.569179 | 3.247584  |
| H  | 6.381022  | -1.570700 | 1.078001  |
| C  | 4.041054  | -1.042677 | 4.178580  |
| H  | 2.461493  | -0.639566 | 2.731542  |
| C  | 5.394409  | -1.376770 | 4.362295  |
| H  | 7.294609  | -1.819456 | 3.391475  |
| H  | 3.388286  | -0.879585 | 5.050210  |
| H  | 5.802557  | -1.479171 | 5.379857  |
| Au | 1.629506  | 0.115219  | -0.047726 |
| H  | -0.148033 | 1.531365  | -1.539751 |
| H  | 1.827119  | 2.531923  | -1.847819 |
| P  | -3.212911 | -1.483317 | 0.017357  |
| C  | -2.046983 | 4.848403  | 0.050633  |
| C  | -2.617835 | 3.587883  | -0.253341 |
| C  | -2.100668 | 5.371537  | 1.354968  |
| C  | -3.207427 | 2.809541  | 0.798701  |
| C  | -2.752162 | 4.659128  | 2.373373  |
| H  | -1.651367 | 6.356252  | 1.561238  |
| C  | -3.299502 | 3.389894  | 2.080956  |
| H  | -2.824140 | 5.074989  | 3.390867  |
| H  | -3.760905 | 2.812932  | 2.899090  |

---

|    |           |           |           |
|----|-----------|-----------|-----------|
| C  | -1.572220 | -2.070380 | 0.627836  |
| C  | -0.717578 | -2.874611 | -0.155891 |
| C  | -1.177956 | -1.695730 | 1.932601  |
| C  | 0.508998  | -3.318567 | 0.368602  |
| H  | -1.012105 | -3.158908 | -1.178122 |
| C  | 0.051541  | -2.135552 | 2.449125  |
| H  | -1.840414 | -1.057075 | 2.540834  |
| C  | 0.894617  | -2.949670 | 1.669013  |
| H  | 1.168541  | -3.952012 | -0.242664 |
| H  | 0.350437  | -1.846405 | 3.469001  |
| H  | 1.860788  | -3.289925 | 2.072289  |
| C  | -3.117571 | -1.718182 | -1.806882 |
| C  | -3.518997 | -2.917652 | -2.432510 |
| C  | -2.588742 | -0.662262 | -2.585942 |
| C  | -3.381122 | -3.062825 | -3.824465 |
| H  | -3.946773 | -3.737177 | -1.833500 |
| C  | -2.449660 | -0.817114 | -3.974637 |
| H  | -2.308222 | 0.290188  | -2.105318 |
| C  | -2.843763 | -2.016998 | -4.595811 |
| H  | -3.702552 | -3.997883 | -4.309391 |
| H  | -2.044710 | 0.010933  | -4.577832 |
| H  | -2.743771 | -2.132497 | -5.686484 |
| C  | -4.421263 | -2.716325 | 0.629147  |
| C  | -4.056057 | -4.047467 | 0.928421  |
| C  | -5.764354 | -2.302484 | 0.772502  |
| C  | -5.035345 | -4.959310 | 1.357382  |
| H  | -3.006781 | -4.369677 | 0.832592  |
| C  | -6.737934 | -3.221164 | 1.197477  |
| H  | -6.040531 | -1.256884 | 0.557069  |
| C  | -6.374422 | -4.548633 | 1.489115  |
| H  | -4.750140 | -5.996461 | 1.593637  |
| H  | -7.784046 | -2.896414 | 1.309412  |
| H  | -7.138201 | -5.265735 | 1.828448  |
| Au | -3.458587 | 0.786279  | 0.530564  |
| H  | -1.565655 | 5.448102  | -0.734718 |
| N  | -2.570308 | 3.063476  | -1.579842 |
| C  | -1.671790 | 3.707944  | -2.527599 |
| H  | -1.562785 | 3.056637  | -3.420366 |
| H  | -2.038365 | 4.703406  | -2.887912 |
| H  | -0.668522 | 3.853555  | -2.081305 |
| C  | -3.866594 | 2.757175  | -2.199179 |
| H  | -4.541633 | 2.276895  | -1.466278 |
| H  | -4.366101 | 3.681163  | -2.584420 |
| H  | -3.728264 | 2.055807  | -3.048556 |
| C  | -0.074140 | 2.159838  | 1.907788  |
| H  | -0.781582 | 2.981600  | 2.159692  |
| H  | -0.598266 | 1.205156  | 2.095703  |
| H  | 0.802963  | 2.250384  | 2.580338  |

**[(PPh<sub>3</sub>)Au(*ortho*-aniline)--(PPh<sub>3</sub>)Au(alkene)]<sup>+</sup> TS Markovnikov**  
-3057.34339563 A.U.

|   |           |           |           |
|---|-----------|-----------|-----------|
| P | 3.910135  | -1.041044 | -0.103021 |
| H | -0.716508 | 0.275234  | -0.996642 |
| C | 0.081867  | 1.030223  | -0.862133 |
| C | -0.110241 | 1.808501  | 0.400128  |
| C | 1.564863  | 3.530728  | -0.483409 |
| C | 0.841731  | 2.973691  | 0.600200  |
| C | 2.482417  | 4.573172  | -0.290283 |
| C | 1.073404  | 3.515614  | 1.885083  |
| C | 2.702062  | 5.096547  | 0.997505  |
| H | 3.040041  | 4.973889  | -1.151538 |
| C | 1.990337  | 4.562526  | 2.083765  |
| H | 0.532724  | 3.116634  | 2.754347  |
| H | 3.425270  | 5.912636  | 1.151173  |
| H | 2.149543  | 4.959317  | 3.098841  |
| C | 4.723710  | -0.027595 | 1.203199  |
| C | 5.767170  | -0.557870 | 1.995910  |
| C | 4.306356  | 1.308717  | 1.400259  |
| C | 6.386798  | 0.242361  | 2.968452  |
| H | 6.088206  | -1.603374 | 1.865874  |
| C | 4.931283  | 2.104437  | 2.375942  |
| H | 3.485920  | 1.731855  | 0.796439  |
| C | 5.971319  | 1.574419  | 3.158154  |
| H | 7.198119  | -0.176676 | 3.584005  |

---

|    |           |           |           |
|----|-----------|-----------|-----------|
| H  | 4.590769  | 3.141833  | 2.517931  |
| H  | 6.460416  | 2.198228  | 3.922811  |
| C  | 5.169435  | -1.326690 | -1.406367 |
| C  | 6.282736  | -2.171379 | -1.194541 |
| C  | 5.030377  | -0.644292 | -2.634449 |
| C  | 7.246678  | -2.325359 | -2.203035 |
| H  | 6.390653  | -2.721665 | -0.246667 |
| C  | 6.001329  | -0.799346 | -3.639063 |
| H  | 4.156280  | 0.008090  | -2.796341 |
| C  | 7.108471  | -1.638189 | -3.423998 |
| H  | 8.111508  | -2.986325 | -2.036176 |
| H  | 5.889989  | -0.264591 | -4.595196 |
| H  | 7.867451  | -1.761390 | -4.212409 |
| C  | 3.591601  | -2.679217 | 0.667194  |
| C  | 3.183244  | -2.746628 | 2.018280  |
| C  | 3.581060  | -3.850100 | -0.123470 |
| C  | 2.775122  | -3.972636 | 2.570076  |
| H  | 3.189207  | -1.837524 | 2.640534  |
| C  | 3.168672  | -5.072514 | 0.433580  |
| H  | 3.899662  | -3.807788 | -1.177357 |
| C  | 2.763525  | -5.136543 | 1.779320  |
| H  | 2.465259  | -4.018845 | 3.625855  |
| H  | 3.165623  | -5.981371 | -0.188155 |
| H  | 2.442186  | -6.096055 | 2.213403  |
| Au | 1.903989  | -0.022920 | -0.699282 |
| H  | 0.129218  | 1.662760  | -1.768102 |
| H  | 1.428396  | 3.123196  | -1.494261 |
| P  | -3.749946 | -1.241312 | 0.091764  |
| C  | -1.579048 | 5.068089  | -0.565032 |
| C  | -1.718844 | 3.672484  | -0.844121 |
| C  | -1.743065 | 5.572533  | 0.719387  |
| C  | -1.878289 | 2.737480  | 0.283176  |
| C  | -2.043177 | 4.717679  | 1.810674  |
| H  | -1.656050 | 6.658866  | 0.880696  |
| C  | -2.095951 | 3.355215  | 1.581046  |
| H  | -2.207331 | 5.130837  | 2.817081  |
| H  | -2.265265 | 2.693393  | 2.445358  |
| C  | -2.210704 | -2.062990 | -0.511791 |
| C  | -1.865794 | -1.942861 | -1.878461 |
| C  | -1.284506 | -2.621124 | 0.395547  |
| C  | -0.610375 | -2.381433 | -2.327248 |
| H  | -2.579225 | -1.496703 | -2.590479 |
| C  | -0.024204 | -3.048131 | -0.058804 |
| H  | -1.543201 | -2.716181 | 1.461697  |
| C  | 0.315123  | -2.925279 | -1.417218 |
| H  | -0.345312 | -2.281886 | -3.391173 |
| H  | 0.702569  | -3.470623 | 0.651365  |
| H  | 1.307624  | -3.252707 | -1.761404 |
| C  | -5.081488 | -1.696448 | -1.072778 |
| C  | -5.103100 | -2.950317 | -1.725101 |
| C  | -6.123872 | -0.768404 | -1.289146 |
| C  | -6.170350 | -3.272032 | -2.579927 |
| H  | -4.280701 | -3.667509 | -1.572524 |
| C  | -7.189383 | -1.099505 | -2.142374 |
| H  | -6.092170 | 0.213757  | -0.789030 |
| C  | -7.213299 | -2.350044 | -2.786116 |
| H  | -6.186781 | -4.247922 | -3.089797 |
| H  | -8.001945 | -0.375608 | -2.309738 |
| H  | -8.047245 | -2.606183 | -3.458146 |
| C  | -4.126870 | -2.017197 | 1.710049  |
| C  | -4.872362 | -3.212184 | 1.803078  |
| C  | -3.605693 | -1.418669 | 2.879454  |
| C  | -5.086985 | -3.804080 | 3.058777  |
| H  | -5.294517 | -3.676786 | 0.898278  |
| C  | -3.816079 | -2.021804 | 4.130493  |
| H  | -3.037745 | -0.476215 | 2.804648  |
| C  | -4.556929 | -3.213848 | 4.220704  |
| H  | -5.675403 | -4.732078 | 3.130042  |
| H  | -3.408684 | -1.552697 | 5.039618  |
| H  | -4.729888 | -3.681294 | 5.202665  |
| Au | -3.087309 | 0.981170  | 0.187308  |
| H  | -1.389828 | 5.779814  | -1.378745 |
| N  | -1.591702 | 3.255760  | -2.152099 |
| C  | -1.025450 | 4.151875  | -3.162138 |

---

|   |           |           |           |
|---|-----------|-----------|-----------|
| H | -0.655281 | 3.538511  | -4.007196 |
| H | -1.776464 | 4.870447  | -3.564447 |
| H | -0.165944 | 4.714755  | -2.752436 |
| C | -2.292918 | 2.119102  | -2.746335 |
| H | -2.861466 | 1.561110  | -1.972144 |
| H | -3.008516 | 2.485250  | -3.516663 |
| H | -1.588015 | 1.408078  | -3.224015 |
| C | -0.226280 | 0.895307  | 1.634001  |
| H | -0.774324 | 1.346297  | 2.481075  |
| H | -0.716601 | -0.060509 | 1.367136  |
| H | 0.796571  | 0.653029  | 1.992818  |

**[(PPh<sub>3</sub>)Au(*ortho*-aniline-alkene)Au(PPh<sub>3</sub>)]<sup>+</sup> Intermediate Markovnikov**

-3057.36983232 A.U.

|    |           |           |           |
|----|-----------|-----------|-----------|
| P  | 4.196307  | -0.857781 | 0.018070  |
| C  | 0.366308  | 0.586539  | -1.713449 |
| C  | -0.186775 | 1.518487  | -0.593982 |
| C  | 1.173221  | 3.657268  | -0.931398 |
| C  | 0.888405  | 2.518562  | -0.150739 |
| C  | 2.184885  | 4.557616  | -0.550457 |
| C  | 1.645952  | 2.300988  | 1.021854  |
| C  | 2.919337  | 4.339830  | 0.628982  |
| H  | 2.395403  | 5.438730  | -1.177163 |
| C  | 2.645684  | 3.205346  | 1.414065  |
| H  | 1.471452  | 1.394311  | 1.625171  |
| H  | 3.706726  | 5.047143  | 0.932465  |
| H  | 3.220276  | 3.016426  | 2.333982  |
| C  | 5.500790  | 0.426718  | -0.167012 |
| C  | 6.857664  | 0.152830  | 0.113680  |
| C  | 5.111017  | 1.731570  | -0.543979 |
| C  | 7.812199  | 1.178634  | 0.022838  |
| H  | 7.172942  | -0.863766 | 0.396274  |
| C  | 6.070468  | 2.754986  | -0.623317 |
| H  | 4.054605  | 1.949508  | -0.769223 |
| C  | 7.419930  | 2.480620  | -0.341823 |
| H  | 8.870110  | 0.959983  | 0.236872  |
| H  | 5.754256  | 3.769772  | -0.910841 |
| H  | 8.172451  | 3.281818  | -0.411685 |
| C  | 4.955534  | -2.459116 | -0.451711 |
| C  | 5.768782  | -3.205614 | 0.431188  |
| C  | 4.732167  | -2.928357 | -1.765513 |
| C  | 6.359005  | -4.403774 | -0.004434 |
| H  | 5.931949  | -2.855962 | 1.463157  |
| C  | 5.329793  | -4.124540 | -2.196239 |
| H  | 4.083415  | -2.351061 | -2.445177 |
| C  | 6.143469  | -4.861923 | -1.317245 |
| H  | 6.991872  | -4.983337 | 0.685882  |
| H  | 5.155037  | -4.484938 | -3.222015 |
| H  | 6.608645  | -5.801403 | -1.654688 |
| C  | 3.906450  | -0.958816 | 1.834407  |
| C  | 4.182629  | 0.143082  | 2.670937  |
| C  | 3.267337  | -2.098485 | 2.373551  |
| C  | 3.814336  | 0.107736  | 4.027389  |
| H  | 4.688217  | 1.029131  | 2.256864  |
| C  | 2.908720  | -2.132481 | 3.730780  |
| H  | 3.060955  | -2.966917 | 1.727721  |
| C  | 3.175506  | -1.026178 | 4.559763  |
| H  | 4.037939  | 0.970372  | 4.674867  |
| H  | 2.419879  | -3.028845 | 4.144086  |
| H  | 2.894257  | -1.053628 | 5.624122  |
| Au | 2.185468  | -0.226210 | -0.993090 |
| H  | 0.642486  | 1.220762  | -2.588246 |
| H  | -0.395649 | 0.863784  | 0.275575  |
| H  | 0.592926  | 3.844388  | -1.849996 |
| P  | -3.986067 | -1.131951 | 0.213805  |
| C  | -2.654146 | 4.501927  | -0.555485 |
| C  | -2.988227 | 4.582917  | -1.909135 |
| C  | -1.929586 | 3.396546  | -0.022472 |
| C  | -2.613232 | 3.565922  | -2.808283 |
| C  | -1.483485 | 2.335241  | -0.940136 |
| H  | -3.566754 | 5.449313  | -2.266971 |
| C  | -1.860506 | 2.488947  | -2.329587 |
| H  | -2.877918 | 3.625614  | -3.873911 |
| H  | -1.465384 | 1.755741  | -3.046306 |

|    |           |           |           |
|----|-----------|-----------|-----------|
| C  | -5.116669 | -2.092202 | -0.850663 |
| C  | -6.090883 | -2.954404 | -0.302654 |
| C  | -4.966357 | -1.987092 | -2.252091 |
| C  | -6.907628 | -3.710976 | -1.159783 |
| H  | -6.218721 | -3.029467 | 0.788618  |
| C  | -5.780786 | -2.754325 | -3.099872 |
| H  | -4.212957 | -1.301344 | -2.674662 |
| C  | -6.751895 | -3.614276 | -2.554416 |
| H  | -7.672803 | -4.378400 | -0.733973 |
| H  | -5.663556 | -2.672809 | -4.191536 |
| H  | -7.396485 | -4.207741 | -3.221369 |
| C  | -4.759948 | -0.928306 | 1.854965  |
| C  | -4.652049 | -1.942512 | 2.832945  |
| C  | -5.492609 | 0.247648  | 2.128854  |
| C  | -5.287877 | -1.779953 | 4.075154  |
| H  | -4.064674 | -2.851395 | 2.625412  |
| C  | -6.126752 | 0.400617  | 3.372410  |
| H  | -5.557954 | 1.042094  | 1.367042  |
| C  | -6.025567 | -0.612376 | 4.343880  |
| H  | -5.204661 | -2.569067 | 4.838578  |
| H  | -6.699400 | 1.316484  | 3.585799  |
| H  | -6.520730 | -0.488709 | 5.319678  |
| C  | -2.472591 | -2.147545 | 0.463840  |
| C  | -2.208374 | -3.284112 | -0.325947 |
| C  | -1.463518 | -1.627912 | 1.311212  |
| C  | -0.929154 | -3.871935 | -0.293188 |
| H  | -2.985231 | -3.691655 | -0.991399 |
| C  | -0.187970 | -2.207689 | 1.326400  |
| H  | -1.667864 | -0.746458 | 1.938728  |
| C  | 0.083990  | -3.323063 | 0.510382  |
| H  | -0.720235 | -4.751222 | -0.921789 |
| H  | 0.604785  | -1.781420 | 1.960095  |
| H  | 1.094697  | -3.758751 | 0.496279  |
| Au | -3.121526 | 0.822867  | -0.654701 |
| H  | -2.979728 | 5.305866  | 0.118743  |
| N  | -1.592405 | 3.389322  | 1.316708  |
| C  | -1.597856 | 2.184142  | 2.130809  |
| H  | -2.103331 | 2.396602  | 3.096856  |
| H  | -2.183181 | 1.389567  | 1.620224  |
| H  | -0.579142 | 1.797368  | 2.349108  |
| C  | -1.498370 | 4.639384  | 2.064261  |
| H  | -2.472418 | 4.964450  | 2.500643  |
| H  | -0.776979 | 4.500419  | 2.894353  |
| H  | -1.101434 | 5.446345  | 1.419144  |
| C  | -0.557274 | -0.556230 | -2.158821 |
| H  | -0.786767 | -1.237340 | -1.319467 |
| H  | -1.540863 | -0.229021 | -2.582871 |
| H  | -0.069649 | -1.165902 | -2.946922 |

**[(PPh<sub>3</sub>)Au(*ortho*-aniline-alkene)] Markovnikov**  
-1885.82287490 A.U.

|   |           |           |           |
|---|-----------|-----------|-----------|
| P | 2.290674  | -0.134913 | 0.067633  |
| C | -1.755831 | -1.918620 | -0.258074 |
| C | -2.675546 | -0.743277 | 0.179429  |
| C | -2.302559 | 0.934176  | -1.719913 |
| C | -2.176096 | 0.602983  | -0.354971 |
| C | -1.781940 | 2.142587  | -2.217777 |
| C | -1.533039 | 1.523173  | 0.500643  |
| C | -1.123670 | 3.040736  | -1.356832 |
| H | -1.888395 | 2.382987  | -3.288264 |
| C | -0.998987 | 2.724516  | 0.008911  |
| H | -1.430221 | 1.273230  | 1.568248  |
| H | -0.703982 | 3.980439  | -1.749755 |
| H | -0.474373 | 3.408573  | 0.694879  |
| C | 2.767438  | 0.571036  | -1.562651 |
| C | 4.095064  | 0.603501  | -2.037303 |
| C | 1.725289  | 1.123270  | -2.342775 |
| C | 4.376981  | 1.190561  | -3.284317 |
| H | 4.908709  | 0.170494  | -1.434129 |
| C | 2.016951  | 1.718830  | -3.579087 |
| H | 0.684931  | 1.093532  | -1.979242 |
| C | 3.341810  | 1.751532  | -4.053515 |
| H | 5.414136  | 1.210610  | -3.655236 |
| H | 1.198589  | 2.153387  | -4.174717 |

|    |           |           |           |
|----|-----------|-----------|-----------|
| H  | 3.568127  | 2.211663  | -5.028592 |
| C  | 3.793268  | -0.993377 | 0.683869  |
| C  | 4.825946  | -0.315988 | 1.368561  |
| C  | 3.908605  | -2.378540 | 0.432850  |
| C  | 5.967766  | -1.019549 | 1.788184  |
| H  | 4.732170  | 0.761873  | 1.576944  |
| C  | 5.055269  | -3.075254 | 0.849100  |
| H  | 3.087791  | -2.905526 | -0.081851 |
| C  | 6.085020  | -2.396981 | 1.526455  |
| H  | 6.770260  | -0.488868 | 2.324851  |
| H  | 5.140707  | -4.155478 | 0.651790  |
| H  | 6.980351  | -2.945927 | 1.858990  |
| C  | 2.116094  | 1.350231  | 1.147292  |
| C  | 2.582674  | 2.624630  | 0.764420  |
| C  | 1.436376  | 1.195170  | 2.376073  |
| C  | 2.370855  | 3.732427  | 1.604135  |
| H  | 3.097531  | 2.754567  | -0.200268 |
| C  | 1.229921  | 2.303082  | 3.212412  |
| H  | 1.048512  | 0.203212  | 2.661315  |
| C  | 1.693444  | 3.574954  | 2.825998  |
| H  | 2.731126  | 4.726780  | 1.296087  |
| H  | 0.692161  | 2.176364  | 4.165288  |
| H  | 1.520411  | 4.446316  | 3.477255  |
| Au | 0.242210  | -1.270517 | -0.060437 |
| H  | -1.881885 | -2.084571 | -1.354410 |
| H  | -2.583471 | -0.685286 | 1.282847  |
| H  | -2.820102 | 0.234482  | -2.395728 |
| C  | -6.446180 | 0.014025  | -0.014285 |
| C  | -6.868448 | -0.840080 | -1.047443 |
| C  | -5.109868 | -0.002825 | 0.442654  |
| C  | -5.954279 | -1.730658 | -1.629006 |
| C  | -4.164071 | -0.880200 | -0.171613 |
| H  | -7.916352 | -0.813448 | -1.387561 |
| C  | -4.617100 | -1.739314 | -1.189805 |
| H  | -6.272501 | -2.410424 | -2.435369 |
| H  | -3.896172 | -2.413047 | -1.678195 |
| H  | -7.169144 | 0.700068  | 0.453014  |
| N  | -4.662198 | 0.882936  | 1.466436  |
| C  | -4.450615 | 0.291699  | 2.780860  |
| H  | -5.403806 | 0.186375  | 3.363670  |
| H  | -4.009131 | -0.719584 | 2.687472  |
| H  | -3.752676 | 0.919058  | 3.378739  |
| C  | -5.260897 | 2.203369  | 1.524574  |
| H  | -6.275287 | 2.228884  | 2.005871  |
| H  | -4.601957 | 2.876598  | 2.115219  |
| H  | -5.347158 | 2.622538  | 0.502640  |
| C  | -2.085657 | -3.216160 | 0.496984  |
| H  | -1.915602 | -3.099102 | 1.589170  |
| H  | -3.149283 | -3.524319 | 0.365994  |
| H  | -1.447227 | -4.056465 | 0.153757  |

**[(PPh<sub>3</sub>)Au(*para*-aniline)--(PPh<sub>3</sub>)Au(alkene)]<sup>+</sup> TS anti-Markovnikov**  
-3057.34407815 A.U.

|   |           |           |           |
|---|-----------|-----------|-----------|
| P | 3.977339  | -1.039417 | 0.192995  |
| C | 0.350340  | 1.430904  | -0.819750 |
| C | -0.227058 | 1.390112  | 0.524938  |
| C | 0.532543  | 3.280197  | -2.572975 |
| C | 0.800004  | 2.801033  | -1.268245 |
| C | 0.826809  | 4.605723  | -2.937036 |
| C | 1.433126  | 3.693541  | -0.363441 |
| C | 1.408455  | 5.486690  | -2.010369 |
| H | 0.592815  | 4.952970  | -3.955978 |
| C | 1.724263  | 5.014465  | -0.720380 |
| H | 1.692558  | 3.345070  | 0.648728  |
| H | 1.642056  | 6.523885  | -2.298212 |
| H | 2.204121  | 5.684092  | 0.011015  |
| C | 5.579401  | -0.251436 | -0.220289 |
| C | 6.695594  | -1.015708 | -0.627938 |
| C | 5.692470  | 1.150939  | -0.092649 |
| C | 7.918773  | -0.377297 | -0.892926 |
| H | 6.605286  | -2.106855 | -0.749733 |
| C | 6.919150  | 1.780833  | -0.357624 |
| H | 4.813615  | 1.747931  | 0.202367  |
| C | 8.032210  | 1.018063  | -0.755436 |



---

|    |           |           |           |
|----|-----------|-----------|-----------|
| H  | 8.787433  | -0.973663 | -1.212908 |
| H  | 7.003614  | 2.874442  | -0.261830 |
| H  | 8.991686  | 1.514841  | -0.968236 |
| C  | 3.952384  | -2.609381 | -0.761774 |
| C  | 3.863997  | -3.870689 | -0.137506 |
| C  | 3.969126  | -2.520605 | -2.173219 |
| C  | 3.800074  | -5.036365 | -0.923139 |
| H  | 3.844135  | -3.945270 | 0.960869  |
| C  | 3.916859  | -3.688055 | -2.949813 |
| H  | 4.025384  | -1.534336 | -2.662725 |
| C  | 3.830231  | -4.947985 | -2.325704 |
| H  | 3.728535  | -6.019547 | -0.432713 |
| H  | 3.938019  | -3.615113 | -4.048295 |
| H  | 3.783547  | -5.862921 | -2.936518 |
| C  | 4.076284  | -1.545330 | 1.955110  |
| C  | 5.297553  | -1.966218 | 2.526076  |
| C  | 2.895758  | -1.561181 | 2.731301  |
| C  | 5.330026  | -2.410223 | 3.858179  |
| H  | 6.225098  | -1.941093 | 1.932722  |
| C  | 2.934539  | -2.010785 | 4.061823  |
| H  | 1.947957  | -1.207885 | 2.291893  |
| C  | 4.150507  | -2.437009 | 4.625107  |
| H  | 6.284386  | -2.734527 | 4.301524  |
| H  | 2.012302  | -2.020226 | 4.663500  |
| H  | 4.181707  | -2.784438 | 5.669605  |
| Au | 2.119809  | 0.271117  | -0.286089 |
| H  | 0.206678  | 2.047549  | 1.290920  |
| H  | -0.528852 | 0.404477  | 0.912560  |
| H  | 0.056447  | 2.622808  | -3.314201 |
| P  | -3.713015 | -1.591536 | -0.034911 |
| C  | -1.833392 | 4.385169  | 2.118355  |
| C  | -1.719888 | 5.290986  | 1.010174  |
| C  | -2.016732 | 3.024599  | 1.906465  |
| C  | -1.882161 | 4.746939  | -0.303419 |
| C  | -2.093617 | 2.437742  | 0.594748  |
| H  | -2.053874 | 2.360920  | 2.787149  |
| C  | -2.058146 | 3.383760  | -0.489417 |
| H  | -1.829076 | 5.394780  | -1.187819 |
| H  | -2.154886 | 3.018483  | -1.522436 |
| C  | -4.891588 | -1.925595 | -1.397898 |
| C  | -5.616745 | -3.134539 | -1.474361 |
| C  | -5.032270 | -0.952938 | -2.412853 |
| C  | -6.471426 | -3.367502 | -2.564475 |
| H  | -5.522630 | -3.890091 | -0.678470 |
| C  | -5.884084 | -1.195560 | -3.503231 |
| H  | -4.476117 | -0.003314 | -2.339813 |
| C  | -6.603319 | -2.401910 | -3.579467 |
| H  | -7.041492 | -4.308037 | -2.619478 |
| H  | -5.993818 | -0.434810 | -4.291735 |
| H  | -7.276949 | -2.587694 | -4.430638 |
| C  | -4.308526 | -2.517002 | 1.428673  |
| C  | -3.988732 | -3.878827 | 1.626542  |
| C  | -5.132094 | -1.842688 | 2.357102  |
| C  | -4.502825 | -4.560969 | 2.742092  |
| H  | -3.331904 | -4.401596 | 0.912856  |
| C  | -5.644455 | -2.532283 | 3.468234  |
| H  | -5.363741 | -0.775129 | 2.207470  |
| C  | -5.331665 | -3.890478 | 3.660231  |
| H  | -4.253484 | -5.622589 | 2.895889  |
| H  | -6.286640 | -2.004995 | 4.190722  |
| H  | -5.731604 | -4.428637 | 4.533864  |
| C  | -2.135251 | -2.411592 | -0.532004 |
| C  | -1.927009 | -2.892390 | -1.840402 |
| C  | -1.057784 | -2.395034 | 0.387185  |
| C  | -0.649268 | -3.337775 | -2.228544 |
| H  | -2.757516 | -2.903789 | -2.563379 |
| C  | 0.211983  | -2.842969 | -0.007164 |
| H  | -1.215440 | -2.014289 | 1.410135  |
| C  | 0.420855  | -3.308841 | -1.319699 |
| H  | -0.490656 | -3.706236 | -3.254044 |
| H  | 1.050954  | -2.826581 | 0.705601  |
| H  | 1.419455  | -3.649177 | -1.628049 |
| Au | -3.095284 | 0.623555  | 0.323244  |
| H  | -1.754120 | 4.754981  | 3.149604  |

---

|   |           |           |           |
|---|-----------|-----------|-----------|
| N | -1.447397 | 6.621950  | 1.196089  |
| C | -1.334798 | 7.173168  | 2.542588  |
| H | -1.150842 | 8.260776  | 2.479301  |
| H | -2.267833 | 7.019912  | 3.127990  |
| H | -0.492980 | 6.715134  | 3.108653  |
| C | -1.258019 | 7.498722  | 0.044528  |
| H | -2.194535 | 7.620286  | -0.544343 |
| H | -0.941899 | 8.498471  | 0.393016  |
| H | -0.471000 | 7.102018  | -0.635163 |
| C | -0.376847 | 0.578120  | -1.862076 |
| H | -1.344412 | 1.050314  | -2.153065 |
| H | 0.221641  | 0.435296  | -2.783465 |
| H | -0.617366 | -0.422295 | -1.459267 |

**[(PPh<sub>3</sub>)Au(*para*-aniline-alkene)Au(PPh<sub>3</sub>)]<sup>+</sup> Intermediate anti-Markovnikov**

-3057.38530206 A.U.

|    |           |           |           |
|----|-----------|-----------|-----------|
| P  | 5.068362  | -0.075807 | 0.017154  |
| C  | 0.792861  | -1.001186 | -0.804460 |
| C  | 0.305776  | -2.297705 | -0.103327 |
| C  | 0.039729  | 1.460336  | -0.779347 |
| C  | 0.364362  | 0.260865  | -0.080879 |
| C  | -0.225603 | 2.663329  | -0.105340 |
| C  | 0.359299  | 0.342670  | 1.348963  |
| C  | -0.192553 | 2.721386  | 1.296936  |
| H  | -0.477625 | 3.561185  | -0.691536 |
| C  | 0.100522  | 1.546329  | 2.019044  |
| H  | 0.622323  | -0.547875 | 1.939115  |
| H  | -0.402195 | 3.664806  | 1.823912  |
| H  | 0.134399  | 1.567981  | 3.120347  |
| C  | 5.806191  | -1.023454 | 1.405737  |
| C  | 6.527193  | -0.405305 | 2.449246  |
| C  | 5.655556  | -2.428700 | 1.389202  |
| C  | 7.100752  | -1.192568 | 3.463337  |
| H  | 6.637902  | 0.690194  | 2.471683  |
| C  | 6.237161  | -3.208912 | 2.400874  |
| H  | 5.076841  | -2.905925 | 0.580666  |
| C  | 6.960189  | -2.591474 | 3.438635  |
| H  | 7.661497  | -0.708055 | 4.278031  |
| H  | 6.121128  | -4.303902 | 2.382923  |
| H  | 7.411924  | -3.203978 | 4.234682  |
| C  | 5.006881  | 1.679765  | 0.571763  |
| C  | 6.128570  | 2.529419  | 0.447395  |
| C  | 3.809971  | 2.177918  | 1.136521  |
| C  | 6.054089  | 3.859298  | 0.895981  |
| H  | 7.058481  | 2.154113  | -0.009161 |
| C  | 3.742655  | 3.508103  | 1.580104  |
| H  | 2.919150  | 1.532647  | 1.216069  |
| C  | 4.863492  | 4.349755  | 1.462747  |
| H  | 6.930852  | 4.518184  | 0.795706  |
| H  | 2.800257  | 3.885832  | 2.007062  |
| H  | 4.807967  | 5.394850  | 1.806069  |
| C  | 6.331959  | -0.106622 | -1.313777 |
| C  | 7.673688  | -0.470782 | -1.071408 |
| C  | 5.929920  | 0.280171  | -2.612049 |
| C  | 8.606742  | -0.439103 | -2.122880 |
| H  | 7.988753  | -0.782201 | -0.062900 |
| C  | 6.868262  | 0.315177  | -3.655285 |
| H  | 4.877326  | 0.549877  | -2.800752 |
| C  | 8.207235  | -0.044077 | -3.411681 |
| H  | 9.652715  | -0.726254 | -1.932273 |
| H  | 6.552325  | 0.617766  | -4.665922 |
| H  | 8.941008  | -0.021635 | -4.232594 |
| Au | 2.906160  | -0.762911 | -0.540497 |
| H  | 0.701864  | -2.345550 | 0.930533  |
| H  | 0.758667  | -3.166190 | -0.626871 |
| H  | 0.013063  | 1.459552  | -1.876674 |
| P  | -3.956593 | 1.143499  | -0.074942 |
| C  | -3.195715 | -3.649392 | -1.050036 |
| C  | -3.854993 | -3.775013 | 0.217393  |
| C  | -1.940513 | -3.057221 | -1.160395 |
| C  | -3.145879 | -3.313565 | 1.366273  |
| C  | -1.211895 | -2.552675 | -0.024830 |
| H  | -1.463939 | -3.015812 | -2.150243 |
| C  | -1.876943 | -2.718665 | 1.241897  |

---

|    |           |           |           |
|----|-----------|-----------|-----------|
| H  | -3.579308 | -3.399285 | 2.370568  |
| H  | -1.337059 | -2.436972 | 2.160787  |
| C  | -4.453575 | 1.854111  | 1.538193  |
| C  | -5.759560 | 2.348441  | 1.749195  |
| C  | -3.488246 | 1.939489  | 2.565083  |
| C  | -6.090637 | 2.932590  | 2.983521  |
| H  | -6.518223 | 2.272535  | 0.954399  |
| C  | -3.827177 | 2.528467  | 3.793919  |
| H  | -2.472876 | 1.548607  | 2.393087  |
| C  | -5.126666 | 3.024557  | 4.004308  |
| H  | -7.109655 | 3.315469  | 3.149424  |
| H  | -3.073171 | 2.594207  | 4.593825  |
| H  | -5.392362 | 3.480027  | 4.971121  |
| C  | -5.501672 | 0.507215  | -0.837999 |
| C  | -6.297964 | 1.323890  | -1.669352 |
| C  | -5.919368 | -0.807405 | -0.530522 |
| C  | -7.511501 | 0.828656  | -2.178962 |
| H  | -5.967659 | 2.344248  | -1.921568 |
| C  | -7.137477 | -1.289311 | -1.033491 |
| H  | -5.282854 | -1.457672 | 0.091488  |
| C  | -7.935089 | -0.472946 | -1.857525 |
| H  | -8.129365 | 1.465583  | -2.830923 |
| H  | -7.463624 | -2.310555 | -0.782934 |
| H  | -8.887787 | -0.855153 | -2.256204 |
| C  | -3.410555 | 2.544955  | -1.117823 |
| C  | -3.521197 | 3.882987  | -0.689517 |
| C  | -2.820551 | 2.245048  | -2.365840 |
| C  | -3.039885 | 4.917999  | -1.511281 |
| H  | -3.969078 | 4.117134  | 0.288712  |
| C  | -2.350171 | 3.282659  | -3.183596 |
| H  | -2.708813 | 1.194502  | -2.681515 |
| C  | -2.454676 | 4.620184  | -2.754443 |
| H  | -3.120570 | 5.963209  | -1.174525 |
| H  | -1.888504 | 3.048020  | -4.155305 |
| H  | -2.075026 | 5.433237  | -3.392700 |
| Au | -2.388463 | -0.516728 | 0.097509  |
| H  | -3.679149 | -4.013184 | -1.965659 |
| N  | -5.126736 | -4.292863 | 0.311480  |
| C  | -5.786296 | -4.834321 | -0.871953 |
| H  | -6.802997 | -5.172248 | -0.600655 |
| H  | -5.886768 | -4.065495 | -1.669394 |
| H  | -5.238762 | -5.705412 | -1.297545 |
| C  | -5.766499 | -4.420028 | 1.615644  |
| H  | -5.832168 | -3.436131 | 2.130882  |
| H  | -6.795884 | -4.799879 | 1.484337  |
| H  | -5.223797 | -5.125160 | 2.285506  |
| C  | 0.435542  | -0.998491 | -2.300175 |
| H  | 0.729430  | -1.958320 | -2.771513 |
| H  | -0.659077 | -0.848348 | -2.471742 |
| H  | 0.958523  | -0.197521 | -2.859752 |

**[(PPh<sub>3</sub>)Au(*para*-aniline-alkene)] anti-Markovnikov**

-1885.82205649 A.U.

|   |           |           |           |
|---|-----------|-----------|-----------|
| P | 2.695905  | -0.245311 | 0.046520  |
| C | -1.709646 | -0.424841 | -0.457887 |
| C | -2.505649 | -1.175100 | 0.657061  |
| C | -1.949330 | 1.949551  | -1.435289 |
| C | -1.768895 | 1.090731  | -0.321532 |
| C | -1.879473 | 3.348957  | -1.308775 |
| C | -1.557712 | 1.723280  | 0.938230  |
| C | -1.649424 | 3.947194  | -0.059323 |
| H | -2.013150 | 3.978430  | -2.203980 |
| C | -1.496588 | 3.116497  | 1.069483  |
| H | -1.403248 | 1.097049  | 1.831182  |
| H | -1.598359 | 5.043237  | 0.039257  |
| H | -1.319070 | 3.560488  | 2.062688  |
| C | 3.311393  | -0.411556 | 1.771709  |
| C | 4.211423  | 0.504806  | 2.356243  |
| C | 2.853500  | -1.519002 | 2.520952  |
| C | 4.657453  | 0.305591  | 3.674702  |
| H | 4.559387  | 1.377941  | 1.782098  |
| C | 3.307780  | -1.716204 | 3.834770  |
| H | 2.129481  | -2.218146 | 2.069991  |
| C | 4.210453  | -0.804496 | 4.413101  |

---

|    |            |           |           |
|----|------------|-----------|-----------|
| H  | 5.357058   | 1.025620  | 4.128218  |
| H  | 2.946528   | -2.580448 | 4.414192  |
| H  | 4.559626   | -0.955492 | 5.446883  |
| C  | 3.032784   | 1.506100  | -0.424833 |
| C  | 4.290701   | 1.915624  | -0.920191 |
| C  | 1.995864   | 2.456523  | -0.275649 |
| C  | 4.509805   | 3.263973  | -1.251615 |
| H  | 5.097609   | 1.177525  | -1.055155 |
| C  | 2.222390   | 3.801482  | -0.609411 |
| H  | 1.000026   | 2.150991  | 0.087293  |
| C  | 3.477771   | 4.207744  | -1.096181 |
| H  | 5.491867   | 3.577118  | -1.640449 |
| H  | 1.397729   | 4.522906  | -0.497762 |
| H  | 3.651362   | 5.261914  | -1.365246 |
| C  | 3.873183   | -1.233651 | -0.963114 |
| C  | 5.141983   | -1.631833 | -0.489962 |
| C  | 3.467778   | -1.593381 | -2.268351 |
| C  | 5.999432   | -2.373953 | -1.321407 |
| H  | 5.457695   | -1.365786 | 0.531427  |
| C  | 4.331054   | -2.328885 | -3.095790 |
| H  | 2.466338   | -1.301291 | -2.626301 |
| C  | 5.597865   | -2.720128 | -2.623802 |
| H  | 6.987774   | -2.684659 | -0.946884 |
| H  | 4.008867   | -2.606792 | -4.111725 |
| H  | 6.271450   | -3.303430 | -3.271446 |
| Au | 0.401104   | -0.642896 | -0.213554 |
| H  | -2.162159  | -0.846899 | 1.659966  |
| H  | -2.252401  | -2.254327 | 0.591195  |
| H  | -2.130431  | 1.518991  | -2.430120 |
| C  | -6.195370  | -1.787449 | -0.280813 |
| C  | -6.852292  | -0.620630 | 0.204724  |
| C  | -4.814170  | -1.957995 | -0.110803 |
| C  | -6.046250  | 0.340817  | 0.880007  |
| C  | -4.010757  | -1.003311 | 0.546740  |
| H  | -4.342235  | -2.873376 | -0.506268 |
| C  | -4.667858  | 0.146103  | 1.037573  |
| H  | -6.494493  | 1.255655  | 1.291371  |
| H  | -4.083164  | 0.920156  | 1.558759  |
| H  | -6.761800  | -2.574105 | -0.798067 |
| N  | -8.221051  | -0.430619 | 0.031898  |
| C  | -9.021442  | -1.470883 | -0.583648 |
| H  | -10.075396 | -1.139287 | -0.644699 |
| H  | -8.682746  | -1.699763 | -1.620954 |
| H  | -8.998747  | -2.428644 | -0.008905 |
| C  | -8.865240  | 0.738668  | 0.597845  |
| H  | -8.437132  | 1.685972  | 0.195428  |
| H  | -9.941987  | 0.726824  | 0.342937  |
| H  | -8.779449  | 0.782510  | 1.710860  |
| C  | -2.129313  | -0.938885 | -1.845353 |
| H  | -2.066492  | -2.046057 | -1.877399 |
| H  | -3.180519  | -0.658564 | -2.089859 |
| H  | -1.477488  | -0.552207 | -2.655347 |

**[(PPh<sub>3</sub>)Au(*para*-aniline-alkene)]<sup>+</sup> Markovnikov**

-1885.82205649 A.U.

|   |           |           |           |
|---|-----------|-----------|-----------|
| P | 2.695905  | -0.245311 | 0.046520  |
| C | -1.709646 | -0.424841 | -0.457887 |
| C | -2.505649 | -1.175100 | 0.657061  |
| C | -1.949330 | 1.949551  | -1.435289 |
| C | -1.768895 | 1.090731  | -0.321532 |
| C | -1.879473 | 3.348957  | -1.308775 |
| C | -1.557712 | 1.723280  | 0.938230  |
| C | -1.649424 | 3.947194  | -0.059323 |
| H | -2.013150 | 3.978430  | -2.203980 |
| C | -1.496588 | 3.116497  | 1.069483  |
| H | -1.403248 | 1.097049  | 1.831182  |
| H | -1.598359 | 5.043237  | 0.039257  |
| H | -1.319070 | 3.560488  | 2.062688  |
| C | 3.311393  | -0.411556 | 1.771709  |
| C | 4.211423  | 0.504806  | 2.356243  |
| C | 2.853500  | -1.519002 | 2.520952  |
| C | 4.657453  | 0.305591  | 3.674702  |
| H | 4.559387  | 1.377941  | 1.782098  |
| C | 3.307780  | -1.716204 | 3.834770  |

---

|    |            |           |           |
|----|------------|-----------|-----------|
| H  | 2.129481   | -2.218146 | 2.069991  |
| C  | 4.210453   | -0.804496 | 4.413101  |
| H  | 5.357058   | 1.025620  | 4.128218  |
| H  | 2.946528   | -2.580448 | 4.414192  |
| H  | 4.559626   | -0.955492 | 5.446883  |
| C  | 3.032784   | 1.506100  | -0.424833 |
| C  | 4.290701   | 1.915624  | -0.920191 |
| C  | 1.995864   | 2.456523  | -0.275649 |
| C  | 4.509805   | 3.263973  | -1.251615 |
| H  | 5.097609   | 1.177525  | -1.055155 |
| C  | 2.222390   | 3.801482  | -0.609411 |
| H  | 1.000026   | 2.150991  | 0.087293  |
| C  | 3.477771   | 4.207744  | -1.096181 |
| H  | 5.491867   | 3.577118  | -1.640449 |
| H  | 1.397729   | 4.522906  | -0.497762 |
| H  | 3.651362   | 5.261914  | -1.365246 |
| C  | 3.873183   | -1.233651 | -0.963114 |
| C  | 5.141983   | -1.631833 | -0.489962 |
| C  | 3.467778   | -1.593381 | -2.268351 |
| C  | 5.999432   | -2.373953 | -1.321407 |
| H  | 5.457695   | -1.365786 | 0.531427  |
| C  | 4.331054   | -2.328885 | -3.095790 |
| H  | 2.466338   | -1.301291 | -2.626301 |
| C  | 5.597865   | -2.720128 | -2.623802 |
| H  | 6.987774   | -2.684659 | -0.946884 |
| H  | 4.008867   | -2.606792 | -4.111725 |
| H  | 6.271450   | -3.303430 | -3.271446 |
| Au | 0.401104   | -0.642896 | -0.213554 |
| H  | -2.162159  | -0.846899 | 1.659966  |
| H  | -2.252401  | -2.254327 | 0.591195  |
| H  | -2.130431  | 1.518991  | -2.430120 |
| C  | -6.195370  | -1.787449 | -0.280813 |
| C  | -6.852292  | -0.620630 | 0.204724  |
| C  | -4.814170  | -1.957995 | -0.110803 |
| C  | -6.046250  | 0.340817  | 0.880007  |
| C  | -4.010757  | -1.003311 | 0.546740  |
| H  | -4.342235  | -2.873376 | -0.506268 |
| C  | -4.667858  | 0.146103  | 1.037573  |
| H  | -6.494493  | 1.255655  | 1.291371  |
| H  | -4.083164  | 0.920156  | 1.558759  |
| H  | -6.761800  | -2.574105 | -0.798067 |
| N  | -8.221051  | -0.430619 | 0.031898  |
| C  | -9.021442  | -1.470883 | -0.583648 |
| H  | -10.075396 | -1.139287 | -0.644699 |
| H  | -8.682746  | -1.699763 | -1.620954 |
| H  | -8.998747  | -2.428644 | -0.008905 |
| C  | -8.865240  | 0.738668  | 0.597845  |
| H  | -8.437132  | 1.685972  | 0.195428  |
| H  | -9.941987  | 0.726824  | 0.342937  |
| H  | -8.779449  | 0.782510  | 1.710860  |
| C  | -2.129313  | -0.938885 | -1.845353 |
| H  | -2.066492  | -2.046057 | -1.877399 |
| H  | -3.180519  | -0.658564 | -2.089859 |
| H  | -1.477488  | -0.552207 | -2.655347 |

### Using CH<sub>2</sub>=CHPh as alkene and N,N-diethylaniline:

[(PPh<sub>3</sub>)Au(N,N-diethylaniline)]<sup>+</sup>

-1616.07473154 A.U.

|   |           |           |           |
|---|-----------|-----------|-----------|
| P | -1.458449 | 0.083594  | 0.019046  |
| C | 2.773245  | -1.079773 | -1.129244 |
| C | 3.431897  | -0.461677 | 0.022921  |
| C | 2.529190  | -2.504675 | -1.130712 |
| C | 3.643139  | -1.300604 | 1.168899  |
| C | 2.783651  | -3.286907 | -0.008733 |
| H | 2.144138  | -2.960241 | -2.056690 |
| C | 3.335521  | -2.658992 | 1.136946  |
| H | 4.078214  | -0.882894 | 2.085711  |
| H | 2.573683  | -4.365873 | -0.012927 |
| H | 3.536404  | -3.261472 | 2.037231  |
| C | -2.666067 | -1.285627 | 0.119957  |
| C | -4.018583 | -1.087750 | -0.234050 |

---

|    |           |           |           |
|----|-----------|-----------|-----------|
| C  | -2.235358 | -2.537265 | 0.614381  |
| C  | -4.935598 | -2.142454 | -0.085381 |
| H  | -4.353542 | -0.115010 | -0.627438 |
| C  | -3.159354 | -3.583230 | 0.762190  |
| H  | -1.175948 | -2.691182 | 0.879573  |
| C  | -4.508553 | -3.386177 | 0.412926  |
| H  | -5.989912 | -1.990861 | -0.364038 |
| H  | -2.824508 | -4.559324 | 1.145948  |
| H  | -5.230330 | -4.210250 | 0.524257  |
| C  | -2.159933 | 1.318791  | -1.134463 |
| C  | -2.871171 | 2.442407  | -0.661451 |
| C  | -2.019317 | 1.099158  | -2.523611 |
| C  | -3.443720 | 3.338686  | -1.580992 |
| H  | -2.976853 | 2.618713  | 0.420597  |
| C  | -2.597796 | 1.997245  | -3.433730 |
| H  | -1.457611 | 0.223712  | -2.890294 |
| C  | -3.309791 | 3.116714  | -2.962899 |
| H  | -3.997753 | 4.216175  | -1.213135 |
| H  | -2.490022 | 1.825219  | -4.515859 |
| H  | -3.759526 | 3.822087  | -3.678899 |
| C  | -1.416126 | 0.875162  | 1.671381  |
| C  | -2.463879 | 0.697898  | 2.599778  |
| C  | -0.319281 | 1.706561  | 1.991747  |
| C  | -2.411070 | 1.357375  | 3.840583  |
| H  | -3.316263 | 0.043742  | 2.357939  |
| C  | -0.275333 | 2.362660  | 3.230842  |
| H  | 0.504623  | 1.831890  | 1.269812  |
| C  | -1.321702 | 2.188466  | 4.156356  |
| H  | -3.226943 | 1.216730  | 4.566389  |
| H  | 0.582403  | 3.007321  | 3.478480  |
| H  | -1.284575 | 2.699170  | 5.131136  |
| Au | 0.658615  | -0.593087 | -0.600723 |
| H  | 2.869824  | -0.599027 | -2.116241 |
| N  | 3.807422  | 0.849311  | 0.002523  |
| C  | 3.471252  | 1.728725  | -1.125410 |
| H  | 3.377628  | 2.758039  | -0.721338 |
| H  | 2.454916  | 1.465261  | -1.498795 |
| C  | 4.435424  | 1.494932  | 1.165867  |
| H  | 5.140305  | 0.783993  | 1.642165  |
| H  | 5.068376  | 2.320050  | 0.778971  |
| C  | 4.506495  | 1.703559  | -2.256302 |
| H  | 4.206665  | 2.395064  | -3.069614 |
| H  | 5.501919  | 2.021940  | -1.884934 |
| H  | 4.619989  | 0.689337  | -2.690083 |
| C  | 3.415743  | 2.027621  | 2.180576  |
| H  | 2.759002  | 2.792995  | 1.716883  |
| H  | 2.770374  | 1.213315  | 2.568768  |
| H  | 3.931984  | 2.501199  | 3.039989  |

[(PPh<sub>3</sub>)Au(*para*-*N,N*-diethylaniline)]<sup>+</sup> (TS extraction proton by a second *N,N*-diethylaniline)  
-2060.62122345 A.U.

|   |           |           |           |
|---|-----------|-----------|-----------|
| P | -2.820963 | -0.426706 | 0.007359  |
| C | 3.831376  | 2.087505  | 0.029653  |
| C | 2.661290  | 2.870429  | -0.001402 |
| C | 5.064009  | 2.686795  | 0.338968  |
| C | 2.733341  | 4.251102  | 0.270765  |
| C | 5.137441  | 4.061608  | 0.619865  |
| H | 5.974878  | 2.068593  | 0.360952  |
| C | 3.968453  | 4.842210  | 0.583374  |
| H | 1.825942  | 4.872310  | 0.236631  |
| H | 6.104638  | 4.526603  | 0.865392  |
| H | 4.016454  | 5.921329  | 0.797004  |
| C | -3.135687 | 1.351540  | -0.355098 |
| C | -3.513478 | 2.255574  | 0.658593  |
| C | -2.807650 | 1.835701  | -1.643464 |
| C | -3.556585 | 3.635237  | 0.385158  |
| H | -3.768283 | 1.883989  | 1.663440  |
| C | -2.858026 | 3.212064  | -1.910160 |
| H | -2.507136 | 1.130319  | -2.435620 |
| C | -3.226188 | 4.115381  | -0.893891 |
| H | -3.855239 | 4.337804  | 1.178801  |
| H | -2.608915 | 3.583523  | -2.916580 |
| H | -3.262374 | 5.195770  | -1.103669 |
| C | -3.620551 | -0.754008 | 1.623109  |

---

|    |           |           |           |
|----|-----------|-----------|-----------|
| C  | -4.991949 | -1.076791 | 1.715476  |
| C  | -2.846496 | -0.621437 | 2.798189  |
| C  | -5.582304 | -1.257188 | 2.977193  |
| H  | -5.597933 | -1.196740 | 0.803791  |
| C  | -3.445817 | -0.796087 | 4.056455  |
| H  | -1.771776 | -0.384761 | 2.724058  |
| C  | -4.813052 | -1.113539 | 4.146477  |
| H  | -6.650538 | -1.514866 | 3.046951  |
| H  | -2.840261 | -0.692815 | 4.970259  |
| H  | -5.280544 | -1.257701 | 5.133021  |
| C  | -3.726780 | -1.376207 | -1.265168 |
| C  | -4.919307 | -0.885502 | -1.843565 |
| C  | -3.227501 | -2.643254 | -1.640219 |
| C  | -5.609572 | -1.667104 | -2.784826 |
| H  | -5.301990 | 0.109552  | -1.565592 |
| C  | -3.925877 | -3.419611 | -2.579364 |
| H  | -2.288531 | -3.015043 | -1.197664 |
| C  | -5.115850 | -2.932884 | -3.150448 |
| H  | -6.537638 | -1.284291 | -3.237241 |
| H  | -3.535741 | -4.406996 | -2.871075 |
| H  | -5.659240 | -3.541314 | -3.890151 |
| Au | -0.504362 | -0.620468 | -0.005315 |
| H  | 3.784235  | 1.013681  | -0.195568 |
| N  | 1.390092  | 2.240347  | -0.351891 |
| C  | 1.033280  | 2.348369  | -1.806087 |
| H  | 0.256137  | 1.567752  | -1.977834 |
| H  | 0.537618  | 3.331762  | -1.974971 |
| C  | 0.229656  | 2.670966  | 0.480925  |
| H  | -0.004774 | 3.739069  | 0.275722  |
| H  | -0.642175 | 2.096483  | 0.103779  |
| C  | 3.514543  | -1.469781 | 1.255258  |
| C  | 4.150847  | -1.958041 | 0.063754  |
| C  | 2.304393  | -0.791024 | 1.195913  |
| C  | 3.460783  | -1.729012 | -1.176629 |
| C  | 1.608626  | -0.522646 | -0.033998 |
| H  | 1.880527  | -0.417904 | 2.142853  |
| C  | 2.244132  | -1.059695 | -1.207885 |
| H  | 3.894642  | -2.077625 | -2.123254 |
| H  | 1.462749  | 0.843172  | -0.159327 |
| H  | 1.763753  | -0.910751 | -2.189283 |
| H  | 3.979479  | -1.632126 | 2.236611  |
| N  | 5.358014  | -2.602611 | 0.105705  |
| C  | 6.109037  | -2.768784 | 1.358360  |
| H  | 7.186295  | -2.807790 | 1.092609  |
| H  | 5.991818  | -1.856745 | 1.979821  |
| C  | 5.980453  | -3.169172 | -1.099110 |
| H  | 6.596828  | -4.033845 | -0.775717 |
| H  | 5.193666  | -3.598478 | -1.752936 |
| C  | 2.207325  | 2.171838  | -2.762008 |
| H  | 2.931895  | 3.006020  | -2.682113 |
| H  | 2.754202  | 1.227768  | -2.572452 |
| H  | 1.826601  | 2.146465  | -3.802877 |
| C  | 0.414928  | 2.412686  | 1.970990  |
| H  | 1.281134  | 2.963080  | 2.388517  |
| H  | -0.496395 | 2.736096  | 2.512233  |
| H  | 0.558364  | 1.331644  | 2.169034  |
| C  | 5.709266  | -4.024302 | 2.143582  |
| H  | 4.639779  | -3.992235 | 2.435672  |
| H  | 5.866820  | -4.939626 | 1.536746  |
| H  | 6.318452  | -4.117043 | 3.065772  |
| C  | 6.842979  | -2.157630 | -1.864764 |
| H  | 7.306895  | -2.632825 | -2.753118 |
| H  | 6.238053  | -1.294320 | -2.210310 |
| H  | 7.659011  | -1.765371 | -1.223312 |

**[(PPh<sub>3</sub>)Au(*ortho*-*N,N*-diethylaniline)]<sup>+</sup> (TS extraction proton by a second *N,N*-diethylaniline)**

-2060.62422926 A.U.

|   |           |           |           |
|---|-----------|-----------|-----------|
| P | -2.222321 | -0.194719 | -0.017951 |
| C | 0.864681  | 2.383683  | 0.650266  |
| C | 2.242930  | 2.121972  | 0.472400  |
| C | 0.205771  | 3.334612  | -0.144858 |
| C | 2.927832  | 2.804174  | -0.559106 |
| C | 0.894831  | 4.019124  | -1.158610 |
| H | -0.864153 | 3.518907  | 0.035308  |

---

|    |           |           |           |
|----|-----------|-----------|-----------|
| C  | 2.256550  | 3.740922  | -1.362725 |
| H  | 3.991996  | 2.622064  | -0.753921 |
| H  | 0.377020  | 4.762288  | -1.783851 |
| H  | 2.816392  | 4.264627  | -2.153119 |
| C  | -2.618474 | 1.250238  | 1.050766  |
| C  | -2.206592 | 1.203843  | 2.401999  |
| C  | -3.292690 | 2.389490  | 0.562798  |
| C  | -2.452300 | 2.293487  | 3.251414  |
| H  | -1.690127 | 0.308875  | 2.786336  |
| C  | -3.535918 | 3.478890  | 1.419397  |
| H  | -3.619958 | 2.431196  | -0.487769 |
| C  | -3.111581 | 3.436023  | 2.758857  |
| H  | -2.127971 | 2.252013  | 4.302977  |
| H  | -4.060464 | 4.367315  | 1.034532  |
| H  | -3.299001 | 4.293371  | 3.423801  |
| C  | -3.452749 | -1.479059 | 0.410062  |
| C  | -4.744205 | -1.127243 | 0.861822  |
| C  | -3.106686 | -2.838151 | 0.242540  |
| C  | -5.683327 | -2.134552 | 1.137987  |
| H  | -5.012767 | -0.068112 | 1.002999  |
| C  | -4.053324 | -3.839096 | 0.516419  |
| H  | -2.092388 | -3.108877 | -0.094743 |
| C  | -5.339966 | -3.488029 | 0.963606  |
| H  | -6.688783 | -1.861013 | 1.493921  |
| H  | -3.781882 | -4.898292 | 0.387659  |
| H  | -6.078552 | -4.274466 | 1.184172  |
| C  | -2.605380 | 0.356093  | -1.725186 |
| C  | -3.736574 | -0.104089 | -2.430341 |
| C  | -1.730360 | 1.289552  | -2.326193 |
| C  | -3.988271 | 0.371404  | -3.730218 |
| H  | -4.420375 | -0.833507 | -1.968643 |
| C  | -1.997100 | 1.770894  | -3.616604 |
| H  | -0.839842 | 1.640908  | -1.780645 |
| C  | -3.124790 | 1.309520  | -4.322099 |
| H  | -4.868620 | 0.006270  | -4.281591 |
| H  | -1.315275 | 2.502942  | -4.077242 |
| H  | -3.329211 | 1.680969  | -5.338343 |
| Au | -0.006092 | -0.834095 | 0.249836  |
| H  | 0.279692  | 1.844711  | 1.399793  |
| N  | 2.881338  | 1.075710  | 1.259578  |
| C  | 2.760327  | 1.149156  | 2.763187  |
| H  | 3.370198  | 0.294290  | 3.120353  |
| H  | 3.259810  | 2.080126  | 3.103259  |
| C  | 4.299211  | 0.745411  | 0.892870  |
| H  | 4.469924  | -0.283091 | 1.274187  |
| H  | 4.328573  | 0.657483  | -0.207941 |
| C  | 2.008716  | -1.417764 | 0.569063  |
| C  | 2.941743  | -1.772613 | -0.502128 |
| C  | 2.147331  | -2.123082 | 1.819434  |
| C  | 3.922339  | -2.782251 | -0.223425 |
| C  | 3.107070  | -3.101948 | 2.059602  |
| H  | 1.461893  | -1.852135 | 2.639607  |
| C  | 3.992590  | -3.428504 | 1.008910  |
| H  | 4.645466  | -3.076397 | -0.993975 |
| H  | 2.286912  | -0.073704 | 0.914196  |
| H  | 4.763017  | -4.202117 | 1.157865  |
| H  | 3.172564  | -3.607771 | 3.034343  |
| N  | 2.971458  | -1.138263 | -1.729779 |
| C  | 1.963749  | -0.187827 | -2.214269 |
| H  | 2.495589  | 0.646326  | -2.722570 |
| H  | 1.448401  | 0.284195  | -1.354182 |
| C  | 4.024762  | -1.436001 | -2.715506 |
| H  | 4.189837  | -2.531279 | -2.786479 |
| H  | 3.637005  | -1.141261 | -3.710955 |
| C  | 5.339990  | -0.696246 | -2.437883 |
| H  | 5.757733  | -0.969095 | -1.447410 |
| H  | 6.099192  | -0.943259 | -3.207724 |
| H  | 5.184609  | 0.402983  | -2.457792 |
| C  | 0.939064  | -0.840620 | -3.150477 |
| H  | 0.374347  | -1.632260 | -2.615408 |
| H  | 0.208725  | -0.092443 | -3.515316 |
| H  | 1.425011  | -1.303989 | -4.033303 |
| C  | 5.377370  | 1.696686  | 1.415814  |
| H  | 5.505420  | 1.625532  | 2.513757  |



---

|   |          |          |          |
|---|----------|----------|----------|
| H | 6.348885 | 1.424309 | 0.956450 |
| H | 5.169258 | 2.755736 | 1.164067 |
| C | 1.367013 | 1.040354 | 3.383876 |
| H | 0.765972 | 0.232255 | 2.920255 |
| H | 1.490775 | 0.793051 | 4.457580 |
| H | 0.790136 | 1.981760 | 3.328396 |

**[(PPh<sub>3</sub>)Au(*N,N*-diethylaniline)Cl]**

-1480.95355107 A.U.

P -1.098126

**[(PPh<sub>3</sub>)Au(alkene)(*para-N,N*-diethylaniline)]<sup>+</sup>**

-1925.53443868 A.U.

|    |           |           |           |
|----|-----------|-----------|-----------|
| P  | 0.288237  | 1.078435  | 0.057011  |
| H  | 2.135204  | -1.641531 | -3.665409 |
| C  | 2.141802  | -1.948946 | -2.606548 |
| C  | 2.890463  | -1.201304 | -1.676148 |
| C  | 2.957800  | -2.898946 | 0.215144  |
| C  | 3.272829  | -1.620231 | -0.310945 |
| C  | 3.276213  | -3.220217 | 1.542088  |
| C  | 3.927012  | -0.682966 | 0.526177  |
| C  | 3.906245  | -2.270675 | 2.370494  |
| H  | 3.035240  | -4.220603 | 1.934325  |
| C  | 4.232398  | -1.003023 | 1.856495  |
| H  | 4.177819  | 0.312652  | 0.128456  |
| H  | 4.149175  | -2.523611 | 3.414118  |
| H  | 4.728200  | -0.256332 | 2.495497  |
| C  | 0.076658  | 0.438323  | 1.763256  |
| C  | -0.424432 | 1.257852  | 2.801163  |
| C  | 0.541883  | -0.860630 | 2.061229  |
| C  | -0.460585 | 0.774046  | 4.119404  |
| H  | -0.784763 | 2.274777  | 2.581303  |
| C  | 0.508976  | -1.334976 | 3.382334  |
| H  | 0.949713  | -1.501305 | 1.263594  |
| C  | 0.006956  | -0.520335 | 4.412513  |
| H  | -0.854995 | 1.414408  | 4.923582  |
| H  | 0.884419  | -2.346124 | 3.602060  |
| H  | -0.021844 | -0.894238 | 5.447819  |
| C  | -1.037726 | 2.328086  | -0.187139 |
| C  | -0.765552 | 3.549019  | -0.841391 |
| C  | -2.347448 | 2.055910  | 0.271163  |
| C  | -1.792721 | 4.488353  | -1.036538 |
| H  | 0.252904  | 3.782477  | -1.186880 |
| C  | -3.360222 | 3.012836  | 0.094839  |
| H  | -2.573652 | 1.109722  | 0.787204  |
| C  | -3.089653 | 4.225737  | -0.564470 |
| H  | -1.570360 | 5.438344  | -1.546714 |
| H  | -4.370357 | 2.815269  | 0.485272  |
| H  | -3.889223 | 4.970260  | -0.700878 |
| C  | 1.868408  | 2.032774  | 0.112023  |
| C  | 2.489405  | 2.383676  | 1.328688  |
| C  | 2.506387  | 2.345494  | -1.111189 |
| C  | 3.737309  | 3.031811  | 1.318514  |
| H  | 2.016084  | 2.130747  | 2.289065  |
| C  | 3.746676  | 3.003555  | -1.116043 |
| H  | 2.037243  | 2.055988  | -2.066651 |
| C  | 4.368850  | 3.339895  | 0.101037  |
| H  | 4.221237  | 3.292611  | 2.272602  |
| H  | 4.234736  | 3.245350  | -2.073040 |
| H  | 5.348817  | 3.841794  | 0.098548  |
| Au | 0.639592  | -0.657630 | -1.513151 |
| H  | 1.880274  | -3.002886 | -2.414602 |
| H  | 3.369570  | -0.269846 | -2.026681 |
| H  | 2.462460  | -3.650608 | -0.418509 |
| C  | -3.204260 | -0.651305 | -1.602623 |
| C  | -3.242160 | -1.297021 | -0.322948 |
| C  | -2.252585 | -0.993235 | -2.558303 |
| C  | -2.240570 | -2.289053 | -0.060499 |
| C  | -1.276924 | -2.001964 | -2.307736 |
| H  | -2.270802 | -0.491051 | -3.537916 |
| C  | -1.315915 | -2.654557 | -1.037765 |
| H  | -2.200737 | -2.796349 | 0.911240  |
| H  | -0.714563 | -2.442050 | -3.145813 |

---

|   |           |           |           |
|---|-----------|-----------|-----------|
| H | -0.610574 | -3.473962 | -0.824773 |
| H | -3.937406 | 0.125950  | -1.851634 |
| N | -4.196420 | -0.975402 | 0.614757  |
| C | -5.318620 | -0.080989 | 0.300521  |
| H | -5.650706 | 0.379137  | 1.254887  |
| H | -4.955073 | 0.760319  | -0.321565 |
| C | -4.238810 | -1.638633 | 1.925246  |
| H | -5.287131 | -1.597215 | 2.285348  |
| H | -4.013968 | -2.720063 | 1.808250  |
| C | -3.296073 | -0.986308 | 2.941689  |
| H | -3.348231 | -1.501452 | 3.922359  |
| H | -2.245167 | -1.021622 | 2.592006  |
| H | -3.560386 | 0.079511  | 3.099257  |
| C | -6.483543 | -0.799099 | -0.391461 |
| H | -7.315855 | -0.093842 | -0.591362 |
| H | -6.158892 | -1.236009 | -1.357910 |
| H | -6.875627 | -1.622284 | 0.240369  |

**[(PPh<sub>3</sub>)Au(alkene)(*ortho*-N,N-diethylaniline)]<sup>+</sup>**

-1925.53513257 A.U.

|    |           |           |           |
|----|-----------|-----------|-----------|
| P  | 0.260580  | 1.081837  | -0.071209 |
| H  | 0.074241  | -3.436721 | -2.185865 |
| C  | 0.733144  | -3.141206 | -1.352965 |
| C  | 1.723086  | -2.157598 | -1.572992 |
| C  | 3.196140  | -2.629090 | 0.446849  |
| C  | 2.891584  | -1.871119 | -0.712398 |
| C  | 4.266201  | -2.262811 | 1.274928  |
| C  | 3.703716  | -0.753076 | -1.025907 |
| C  | 5.047250  | -1.131644 | 0.967254  |
| H  | 4.496228  | -2.865350 | 2.167528  |
| C  | 4.764744  | -0.382225 | -0.188624 |
| H  | 3.481589  | -0.158089 | -1.925418 |
| H  | 5.881167  | -0.841435 | 1.624811  |
| H  | 5.374846  | 0.498472  | -0.441449 |
| C  | 1.192250  | 1.386714  | 1.476892  |
| C  | 1.354470  | 2.692162  | 2.000213  |
| C  | 1.841048  | 0.300026  | 2.101255  |
| C  | 2.147130  | 2.895996  | 3.141271  |
| H  | 0.863043  | 3.551549  | 1.517563  |
| C  | 2.639559  | 0.512558  | 3.236197  |
| H  | 1.737556  | -0.717539 | 1.693295  |
| C  | 2.789416  | 1.807679  | 3.760979  |
| H  | 2.266306  | 3.912656  | 3.547050  |
| H  | 3.148366  | -0.342411 | 3.707103  |
| H  | 3.411179  | 1.972902  | 4.654687  |
| C  | -1.173581 | 2.239208  | -0.073784 |
| C  | -1.729863 | 2.658616  | -1.303048 |
| C  | -1.751093 | 2.686173  | 1.135828  |
| C  | -2.838007 | 3.521482  | -1.320080 |
| H  | -1.287626 | 2.330360  | -2.255955 |
| C  | -2.852454 | 3.559592  | 1.111855  |
| H  | -1.337584 | 2.358629  | 2.100426  |
| C  | -3.397919 | 3.980013  | -0.113869 |
| H  | -3.257448 | 3.848349  | -2.284223 |
| H  | -3.284404 | 3.914475  | 2.060614  |
| H  | -4.258311 | 4.666736  | -0.129577 |
| C  | 1.361215  | 1.674765  | -1.434196 |
| C  | 2.479591  | 2.499099  | -1.191906 |
| C  | 1.110536  | 1.214371  | -2.747999 |
| C  | 3.333406  | 2.854998  | -2.250693 |
| H  | 2.706384  | 2.845416  | -0.172854 |
| C  | 1.958508  | 1.583097  | -3.804728 |
| H  | 0.259835  | 0.540143  | -2.943258 |
| C  | 3.077045  | 2.399859  | -3.555760 |
| H  | 4.210618  | 3.489696  | -2.050263 |
| H  | 1.753182  | 1.220444  | -4.823965 |
| H  | 3.752053  | 2.677112  | -4.380189 |
| Au | -0.058202 | -1.236721 | -0.453667 |
| H  | 0.833207  | -3.881022 | -0.541374 |
| H  | 1.732952  | -1.646244 | -2.552406 |
| H  | 2.594022  | -3.514475 | 0.703366  |
| C  | -1.935327 | -2.221238 | 0.731420  |
| C  | -2.806339 | -1.063072 | 0.748829  |
| C  | -1.111909 | -2.523971 | 1.861601  |

---

|   |           |           |           |
|---|-----------|-----------|-----------|
| C | -2.757437 | -0.244596 | 1.923800  |
| C | -1.053600 | -1.675587 | 2.966447  |
| H | -0.523687 | -3.454922 | 1.839244  |
| C | -1.895514 | -0.538987 | 2.979366  |
| H | -3.410038 | 0.632146  | 2.005821  |
| H | -0.396947 | -1.899146 | 3.819072  |
| H | -1.887481 | 0.130200  | 3.854533  |
| H | -2.116648 | -3.029200 | 0.008834  |
| N | -3.606463 | -0.753202 | -0.321480 |
| C | -3.607555 | -1.588036 | -1.524671 |
| H | -3.927685 | -0.943443 | -2.368835 |
| H | -2.554175 | -1.877853 | -1.752364 |
| C | -4.508907 | 0.406430  | -0.286809 |
| H | -3.977428 | 1.262838  | 0.174536  |
| H | -4.689423 | 0.708999  | -1.338210 |
| C | -4.507250 | -2.830455 | -1.450021 |
| H | -4.416043 | -3.430899 | -2.378349 |
| H | -4.241397 | -3.480208 | -0.591596 |
| H | -5.571111 | -2.542695 | -1.333493 |
| C | -5.840694 | 0.143326  | 0.427416  |
| H | -5.678890 | -0.171564 | 1.478716  |
| H | -6.460356 | 1.063384  | 0.437179  |
| H | -6.421154 | -0.654147 | -0.078223 |

**[(PPh<sub>3</sub>)Au(*para*-*N,N*-diethylaniline)+(PPh<sub>3</sub>)Au(alkene)]<sup>+</sup> adduct**

-3096.65329838 A.U.

|    |           |           |           |
|----|-----------|-----------|-----------|
| P  | 4.093696  | 0.441261  | 0.043074  |
| H  | -0.490426 | -0.502480 | -1.166777 |
| C  | -0.232938 | 0.570641  | -1.108377 |
| C  | -0.689953 | 1.258486  | 0.043297  |
| C  | -0.514715 | 3.633556  | -0.786541 |
| C  | -0.622447 | 5.005101  | -0.542186 |
| C  | -1.220621 | 3.177661  | 1.506841  |
| C  | -1.029827 | 5.471277  | 0.726265  |
| H  | -0.391507 | 5.724092  | -1.343608 |
| C  | -1.319268 | 4.552751  | 1.749760  |
| H  | -1.470203 | 2.456601  | 2.300273  |
| H  | -1.114198 | 6.552286  | 0.914946  |
| H  | -1.634783 | 4.911254  | 2.740841  |
| C  | 5.040660  | 1.641260  | -0.969524 |
| C  | 6.288897  | 1.311592  | -1.540601 |
| C  | 4.509598  | 2.941020  | -1.128847 |
| C  | 7.002695  | 2.284325  | -2.262107 |
| H  | 6.699305  | 0.295325  | -1.429793 |
| C  | 5.231827  | 3.907413  | -1.846081 |
| H  | 3.527450  | 3.191311  | -0.693766 |
| C  | 6.477774  | 3.580066  | -2.412857 |
| H  | 7.974723  | 2.026042  | -2.710372 |
| H  | 4.817180  | 4.919961  | -1.969414 |
| H  | 7.039858  | 4.338024  | -2.980406 |
| C  | 4.751559  | -1.213940 | -0.394716 |
| C  | 5.434918  | -2.030864 | 0.528555  |
| C  | 4.479059  | -1.695264 | -1.696240 |
| C  | 5.834244  | -3.326616 | 0.152437  |
| H  | 5.650293  | -1.663075 | 1.543857  |
| C  | 4.891092  | -2.983498 | -2.068466 |
| H  | 3.933876  | -1.061358 | -2.415078 |
| C  | 5.563769  | -3.803665 | -1.141791 |
| H  | 6.361152  | -3.965382 | 0.878101  |
| H  | 4.678655  | -3.353861 | -3.083338 |
| H  | 5.877707  | -4.818592 | -1.431171 |
| C  | 4.580290  | 0.766958  | 1.779492  |
| C  | 5.934742  | 1.010159  | 2.102219  |
| C  | 3.602471  | 0.765696  | 2.797329  |
| C  | 6.305328  | 1.228740  | 3.438660  |
| H  | 6.697783  | 1.035787  | 1.307843  |
| C  | 3.980745  | 0.986565  | 4.132451  |
| H  | 2.545090  | 0.597317  | 2.539084  |
| C  | 5.330505  | 1.214039  | 4.453986  |
| H  | 7.360779  | 1.418391  | 3.688531  |
| H  | 3.215794  | 0.988312  | 4.924536  |
| H  | 5.624832  | 1.390277  | 5.500351  |
| Au | 1.814631  | 0.534416  | -0.392061 |
| H  | -0.220953 | 1.093871  | -2.081406 |

|    |           |           |           |
|----|-----------|-----------|-----------|
| H  | -0.948458 | 0.634562  | 0.916167  |
| H  | -0.200687 | 3.280059  | -1.780193 |
| P  | -2.202231 | -3.038834 | 0.021166  |
| C  | -4.392466 | 3.148489  | 1.026344  |
| C  | -4.145879 | 3.910979  | -0.158142 |
| C  | -4.207770 | 1.761553  | 1.048511  |
| C  | -3.705256 | 3.187835  | -1.307623 |
| C  | -3.754176 | 1.035492  | -0.084098 |
| H  | -4.407397 | 1.230300  | 1.993728  |
| C  | -3.522541 | 1.803457  | -1.258232 |
| H  | -3.514890 | 3.710242  | -2.254604 |
| H  | -3.171491 | 1.300100  | -2.174619 |
| C  | -2.881805 | -4.345662 | 1.111636  |
| C  | -2.052523 | -5.279052 | 1.772174  |
| C  | -4.284702 | -4.418040 | 1.258866  |
| C  | -2.629043 | -6.285656 | 2.564942  |
| H  | -0.957273 | -5.214535 | 1.670071  |
| C  | -4.853605 | -5.429722 | 2.050026  |
| H  | -4.925864 | -3.674544 | 0.756816  |
| C  | -4.027215 | -6.363125 | 2.701846  |
| H  | -1.982534 | -7.012649 | 3.081099  |
| H  | -5.947411 | -5.484580 | 2.164025  |
| H  | -4.475021 | -7.152092 | 3.326224  |
| C  | -0.483358 | -2.760031 | 0.644733  |
| C  | 0.663659  | -3.237500 | -0.023422 |
| C  | -0.337178 | -2.024025 | 1.843769  |
| C  | 1.942661  | -2.994411 | 0.510403  |
| H  | 0.558939  | -3.802653 | -0.962670 |
| C  | 0.939991  | -1.788553 | 2.374907  |
| H  | -1.232307 | -1.641802 | 2.362224  |
| C  | 2.081580  | -2.274828 | 1.709492  |
| H  | 2.835881  | -3.366700 | -0.013233 |
| H  | 1.045889  | -1.227800 | 3.316973  |
| H  | 3.083275  | -2.086233 | 2.124184  |
| C  | -1.957989 | -3.817371 | -1.625491 |
| C  | -1.826687 | -5.213604 | -1.784724 |
| C  | -1.851080 | -2.969211 | -2.751149 |
| C  | -1.580961 | -5.752607 | -3.059380 |
| H  | -1.922512 | -5.880751 | -0.913597 |
| C  | -1.598268 | -3.513544 | -4.020841 |
| H  | -1.980822 | -1.880588 | -2.629371 |
| C  | -1.462326 | -4.905420 | -4.175851 |
| H  | -1.486386 | -6.843061 | -3.181045 |
| H  | -1.520837 | -2.849226 | -4.895787 |
| H  | -1.274050 | -5.332645 | -5.173303 |
| Au | -3.259436 | -0.949669 | -0.024662 |
| H  | -4.716406 | 3.653540  | 1.947545  |
| N  | -4.312825 | 5.286090  | -0.178825 |
| C  | -5.107026 | 5.981119  | 0.841078  |
| H  | -5.677445 | 6.786303  | 0.329309  |
| H  | -5.875251 | 5.286186  | 1.240093  |
| C  | -3.953315 | 6.077295  | -1.357675 |
| H  | -3.696074 | 7.099703  | -1.005519 |
| H  | -3.015063 | 5.666612  | -1.783958 |
| C  | -0.799266 | 2.689358  | 0.240702  |
| C  | -4.283277 | 6.583525  | 1.984949  |
| H  | -4.937331 | 7.150934  | 2.678754  |
| H  | -3.767894 | 5.792856  | 2.564748  |
| H  | -3.510936 | 7.278806  | 1.596355  |
| C  | -5.054628 | 6.149414  | -2.426520 |
| H  | -4.723808 | 6.768052  | -3.286151 |
| H  | -5.315930 | 5.140129  | -2.803922 |
| H  | -5.980617 | 6.605660  | -2.019439 |

**[(PPh<sub>3</sub>)Au(*para*-*N,N*-diethylaniline)--(PPh<sub>3</sub>)Au(alkene)]<sup>+</sup> TS Markovnikov**  
-3096.64103209 A.U.

|   |           |           |           |
|---|-----------|-----------|-----------|
| P | 3.782794  | -1.367748 | -0.071267 |
| H | -0.849215 | -0.225754 | -1.476489 |
| C | -0.024905 | 0.500561  | -1.330290 |
| C | -0.162025 | 1.295007  | -0.089390 |
| C | 1.351070  | 3.222942  | -0.772241 |
| C | 0.825547  | 2.365997  | 0.222684  |
| C | 2.300695  | 4.205254  | -0.445788 |
| C | 1.276136  | 2.529788  | 1.554866  |

---

|    |           |           |           |
|----|-----------|-----------|-----------|
| C  | 2.749995  | 4.345292  | 0.879364  |
| H  | 2.701203  | 4.859636  | -1.236042 |
| C  | 2.236005  | 3.498718  | 1.880623  |
| H  | 0.873872  | 1.867646  | 2.338704  |
| H  | 3.498888  | 5.111276  | 1.134068  |
| H  | 2.587314  | 3.596718  | 2.919832  |
| C  | 5.090517  | -0.076015 | -0.241698 |
| C  | 6.457762  | -0.382468 | -0.413065 |
| C  | 4.682945  | 1.278747  | -0.188227 |
| C  | 7.404838  | 0.651769  | -0.505684 |
| H  | 6.792181  | -1.427015 | -0.493730 |
| C  | 5.636955  | 2.305385  | -0.268788 |
| H  | 3.615676  | 1.541270  | -0.099884 |
| C  | 6.999170  | 1.995547  | -0.425330 |
| H  | 8.468308  | 0.402453  | -0.645535 |
| H  | 5.301062  | 3.352601  | -0.220770 |
| H  | 7.745645  | 2.801995  | -0.497592 |
| C  | 4.439836  | -2.946819 | -0.721014 |
| C  | 5.524265  | -3.623346 | -0.112788 |
| C  | 3.828222  | -3.499090 | -1.868546 |
| C  | 5.994585  | -4.829051 | -0.657509 |
| H  | 5.993350  | -3.215380 | 0.796580  |
| C  | 4.303743  | -4.706205 | -2.408738 |
| H  | 2.974503  | -2.976758 | -2.331419 |
| C  | 5.387116  | -5.369514 | -1.806213 |
| H  | 6.839012  | -5.351267 | -0.181224 |
| H  | 3.824981  | -5.130395 | -3.305022 |
| H  | 5.758690  | -6.315251 | -2.230784 |
| C  | 3.557106  | -1.603503 | 1.749054  |
| C  | 3.261133  | -0.457179 | 2.522387  |
| C  | 3.503698  | -2.877936 | 2.352579  |
| C  | 2.919508  | -0.587470 | 3.876949  |
| H  | 3.285404  | 0.542924  | 2.062028  |
| C  | 3.161320  | -3.001877 | 3.711656  |
| H  | 3.717011  | -3.783898 | 1.765673  |
| C  | 2.865766  | -1.860408 | 4.475950  |
| H  | 2.693338  | 0.312867  | 4.469898  |
| H  | 3.122967  | -4.001458 | 4.172105  |
| H  | 2.595941  | -1.961473 | 5.538700  |
| Au | 1.754109  | -0.563034 | -0.890573 |
| H  | 0.118401  | 1.098145  | -2.252596 |
| H  | -0.404646 | 0.690642  | 0.801225  |
| H  | 1.018621  | 3.109563  | -1.813817 |
| P  | -3.638443 | -1.669196 | 0.064409  |
| C  | -1.620461 | 4.527378  | 1.098809  |
| C  | -1.430264 | 5.214700  | -0.150268 |
| C  | -1.870734 | 3.167318  | 1.124892  |
| C  | -1.634758 | 4.452654  | -1.355390 |
| C  | -1.959489 | 2.359252  | -0.064481 |
| H  | -1.941878 | 2.672779  | 2.108113  |
| C  | -1.888324 | 3.093853  | -1.298698 |
| H  | -1.573278 | 4.941923  | -2.336610 |
| H  | -1.978890 | 2.539287  | -2.247687 |
| C  | -4.426403 | -2.353414 | -1.441632 |
| C  | -5.163210 | -3.557114 | -1.409917 |
| C  | -4.241292 | -1.671850 | -2.665448 |
| C  | -5.704464 | -4.075322 | -2.598346 |
| H  | -5.321576 | -4.085368 | -0.456508 |
| C  | -4.779407 | -2.199668 | -3.850507 |
| H  | -3.678650 | -0.723322 | -2.683913 |
| C  | -5.511222 | -3.400634 | -3.817573 |
| H  | -6.284414 | -5.010997 | -2.570576 |
| H  | -4.634825 | -1.665493 | -4.802493 |
| H  | -5.939939 | -3.809179 | -4.746037 |
| C  | -4.595032 | -2.287540 | 1.496095  |
| C  | -4.322499 | -3.539550 | 2.090918  |
| C  | -5.652629 | -1.487806 | 1.982383  |
| C  | -5.115913 | -3.989378 | 3.159935  |
| H  | -3.487329 | -4.157011 | 1.723040  |
| C  | -6.443634 | -1.946805 | 3.048102  |
| H  | -5.847600 | -0.503153 | 1.526048  |
| C  | -6.176354 | -3.196831 | 3.635965  |
| H  | -4.903490 | -4.964839 | 3.624861  |
| H  | -7.268133 | -1.322644 | 3.426274  |

|    |           |           |           |
|----|-----------|-----------|-----------|
| H  | -6.794283 | -3.553088 | 4.475023  |
| C  | -1.982589 | -2.480021 | 0.168561  |
| C  | -1.470721 | -3.285389 | -0.868462 |
| C  | -1.170419 | -2.175798 | 1.287402  |
| C  | -0.158456 | -3.786487 | -0.781007 |
| H  | -2.093061 | -3.518582 | -1.746522 |
| C  | 0.133611  | -2.682761 | 1.372636  |
| H  | -1.564074 | -1.532636 | 2.091986  |
| C  | 0.641300  | -3.489363 | 0.334626  |
| H  | 0.242524  | -4.410370 | -1.594842 |
| H  | 0.767757  | -2.437016 | 2.238272  |
| H  | 1.668578  | -3.879642 | 0.392731  |
| Au | -3.079043 | 0.584773  | 0.014138  |
| H  | -1.516387 | 5.065320  | 2.049984  |
| N  | -1.048591 | 6.524271  | -0.192096 |
| C  | -0.852630 | 7.315702  | 1.031505  |
| H  | -1.020126 | 8.379689  | 0.763865  |
| H  | -1.649343 | 7.065527  | 1.761335  |
| C  | -0.709125 | 7.196995  | -1.454687 |
| H  | 0.061471  | 7.961131  | -1.220796 |
| H  | -0.211624 | 6.470917  | -2.130344 |
| C  | -1.917978 | 7.851573  | -2.134128 |
| H  | -2.689366 | 7.098541  | -2.394315 |
| H  | -2.389541 | 8.601917  | -1.466892 |
| H  | -1.608046 | 8.368044  | -3.065369 |
| C  | 0.539991  | 7.126005  | 1.646408  |
| H  | 0.715358  | 6.064880  | 1.915782  |
| H  | 1.333536  | 7.419937  | 0.928918  |
| H  | 0.651430  | 7.748255  | 2.557661  |

**[(PPh<sub>3</sub>)Au(*para*-*N,N*-diethylaniline)--(PPh<sub>3</sub>)Au(alkene)]<sup>+</sup> Intermediate Markovnikov**  
-3096.67024907 A.U.

|   |           |           |           |
|---|-----------|-----------|-----------|
| P | 4.314717  | -0.061796 | -0.095772 |
| H | -0.531121 | -0.145735 | -1.223569 |
| C | 0.104266  | 0.762685  | -1.095188 |
| C | -0.430803 | 1.633284  | 0.071625  |
| C | 0.314004  | 3.961275  | -0.700230 |
| C | 0.411540  | 2.902033  | 0.224852  |
| C | 1.165161  | 5.076788  | -0.608974 |
| C | 1.373471  | 2.991610  | 1.254652  |
| C | 2.122892  | 5.154156  | 0.418480  |
| H | 1.078569  | 5.892481  | -1.344269 |
| C | 2.220140  | 4.108491  | 1.353971  |
| H | 1.478784  | 2.159205  | 1.970632  |
| H | 2.787284  | 6.029236  | 0.493622  |
| H | 2.963042  | 4.161699  | 2.165619  |
| C | 5.320838  | 1.371933  | -0.668504 |
| C | 6.716245  | 1.295020  | -0.865779 |
| C | 4.652303  | 2.603229  | -0.865506 |
| C | 7.434338  | 2.441607  | -1.245002 |
| H | 7.247041  | 0.339508  | -0.735248 |
| C | 5.379857  | 3.748537  | -1.227989 |
| H | 3.559712  | 2.669630  | -0.732223 |
| C | 6.770374  | 3.669809  | -1.419663 |
| H | 8.521977  | 2.374402  | -1.404425 |
| H | 4.847644  | 4.702553  | -1.367015 |
| H | 7.339517  | 4.565797  | -1.713448 |
| C | 5.198200  | -1.591188 | -0.589309 |
| C | 6.364071  | -2.048911 | 0.067338  |
| C | 4.674007  | -2.328493 | -1.675218 |
| C | 6.996181  | -3.227494 | -0.363329 |
| H | 6.770077  | -1.492012 | 0.926812  |
| C | 5.311872  | -3.504883 | -2.102773 |
| H | 3.755445  | -1.976367 | -2.173454 |
| C | 6.472248  | -3.955224 | -1.447624 |
| H | 7.902966  | -3.580760 | 0.152200  |
| H | 4.900124  | -4.073733 | -2.951180 |
| H | 6.969966  | -4.879286 | -1.781149 |
| C | 4.416539  | 0.012580  | 1.746988  |
| C | 4.378209  | 1.272335  | 2.384450  |
| C | 4.369859  | -1.160488 | 2.533458  |
| C | 4.287722  | 1.355444  | 3.783566  |
| H | 4.417470  | 2.192765  | 1.782335  |
| C | 4.283151  | -1.071872 | 3.933527  |

|    |           |           |           |
|----|-----------|-----------|-----------|
| H  | 4.412327  | -2.151677 | 2.056052  |
| C  | 4.236653  | 0.185289  | 4.562389  |
| H  | 4.263166  | 2.343896  | 4.269090  |
| H  | 4.257357  | -1.993466 | 4.536329  |
| H  | 4.170395  | 0.252578  | 5.659513  |
| Au | 2.076949  | 0.193692  | -0.720527 |
| H  | 0.060919  | 1.331815  | -2.051124 |
| H  | -0.298242 | 1.059742  | 1.015451  |
| H  | -0.432156 | 3.911890  | -1.509884 |
| P  | -2.680988 | -2.400793 | 0.120357  |
| C  | -3.836545 | 3.128192  | 1.115435  |
| C  | -4.483186 | 3.401078  | -0.137356 |
| C  | -2.621460 | 2.453165  | 1.170884  |
| C  | -3.824047 | 2.927235  | -1.320081 |
| C  | -1.939896 | 1.975969  | -0.006538 |
| H  | -2.129886 | 2.314473  | 2.147879  |
| C  | -2.604869 | 2.254121  | -1.254305 |
| H  | -4.280259 | 3.075476  | -2.307175 |
| H  | -2.113983 | 1.941533  | -2.189409 |
| C  | -3.229142 | -3.200385 | -1.431809 |
| C  | -3.817790 | -4.482786 | -1.433486 |
| C  | -3.002784 | -2.522067 | -2.651583 |
| C  | -4.172512 | -5.082743 | -2.654284 |
| H  | -4.003827 | -5.011182 | -0.485279 |
| C  | -3.351789 | -3.132895 | -3.865945 |
| H  | -2.551033 | -1.515976 | -2.646477 |
| C  | -3.937905 | -4.412612 | -3.867898 |
| H  | -4.636261 | -6.081388 | -2.655087 |
| H  | -3.171520 | -2.604754 | -4.815117 |
| H  | -4.218134 | -4.887333 | -4.821140 |
| C  | -3.493388 | -3.266093 | 1.507089  |
| C  | -2.928859 | -4.438894 | 2.055661  |
| C  | -4.721011 | -2.769939 | 1.997070  |
| C  | -3.601299 | -5.114716 | 3.087498  |
| H  | -1.964055 | -4.815773 | 1.680325  |
| C  | -5.387371 | -3.453746 | 3.026573  |
| H  | -5.145370 | -1.844218 | 1.574208  |
| C  | -4.828635 | -4.624992 | 3.570727  |
| H  | -3.162145 | -6.027710 | 3.518831  |
| H  | -6.343960 | -3.067187 | 3.410969  |
| H  | -5.350240 | -5.156555 | 4.381902  |
| C  | -0.875840 | -2.725932 | 0.264495  |
| C  | -0.157547 | -3.413012 | -0.735003 |
| C  | -0.195414 | -2.184514 | 1.380704  |
| C  | 1.235989  | -3.559619 | -0.611790 |
| H  | -0.680369 | -3.827120 | -1.610878 |
| C  | 1.192320  | -2.340084 | 1.498314  |
| H  | -0.753581 | -1.626538 | 2.150662  |
| C  | 1.908447  | -3.027544 | 0.499491  |
| H  | 1.802421  | -4.085315 | -1.395847 |
| H  | 1.726073  | -1.903006 | 2.356233  |
| H  | 3.001251  | -3.130454 | 0.572363  |
| Au | -2.802392 | -0.110843 | 0.091290  |
| H  | -4.285706 | 3.466964  | 2.057810  |
| N  | -5.676801 | 4.072037  | -0.197520 |
| C  | -6.390990 | 4.498388  | 1.013573  |
| H  | -7.472067 | 4.530664  | 0.763119  |
| H  | -6.294696 | 3.713172  | 1.792543  |
| C  | -6.301865 | 4.428607  | -1.478286 |
| H  | -6.889989 | 5.355186  | -1.311785 |
| H  | -5.514474 | 4.711058  | -2.207633 |
| C  | -7.203239 | 3.321160  | -2.039616 |
| H  | -7.667794 | 3.641407  | -2.994534 |
| H  | -6.627750 | 2.391758  | -2.228653 |
| H  | -8.018419 | 3.075402  | -1.328185 |
| C  | -5.927170 | 5.860620  | 1.545019  |
| H  | -4.851256 | 5.842607  | 1.813957  |
| H  | -6.071197 | 6.654119  | 0.783078  |
| H  | -6.505658 | 6.144975  | 2.447693  |

[(PPh<sub>3</sub>)Au(*para*-*N,N*-diethylaniline -alkene)] Markovnikov  
-1925.11818411 A.U.

|   |           |           |          |
|---|-----------|-----------|----------|
| P | 2.971103  | -0.290699 | 0.005452 |
| H | -1.550993 | -2.499763 | 0.422183 |

---

|    |           |           |           |
|----|-----------|-----------|-----------|
| C  | -1.258053 | -1.525149 | -0.027214 |
| C  | -2.032618 | -0.366479 | 0.656843  |
| C  | -1.739816 | 1.533012  | -1.037375 |
| C  | -1.451495 | 0.986643  | 0.231556  |
| C  | -1.126778 | 2.723732  | -1.464998 |
| C  | -0.545416 | 1.678266  | 1.064894  |
| C  | -0.212663 | 3.393582  | -0.628748 |
| H  | -1.363543 | 3.133004  | -2.460829 |
| C  | 0.077011  | 2.864802  | 0.641833  |
| H  | -0.299275 | 1.257866  | 2.053487  |
| H  | 0.276093  | 4.320225  | -0.969297 |
| H  | 0.801303  | 3.365262  | 1.304227  |
| C  | 3.296698  | 0.561570  | -1.592886 |
| C  | 4.546084  | 0.533560  | -2.246255 |
| C  | 2.224606  | 1.295873  | -2.151134 |
| C  | 4.721771  | 1.240582  | -3.449754 |
| H  | 5.381879  | -0.040935 | -1.816464 |
| C  | 2.411983  | 2.008347  | -3.345156 |
| H  | 1.244196  | 1.316241  | -1.647072 |
| C  | 3.658843  | 1.980505  | -3.997890 |
| H  | 5.697431  | 1.212924  | -3.960636 |
| H  | 1.572447  | 2.583317  | -3.766869 |
| H  | 3.801543  | 2.534125  | -4.939628 |
| C  | 4.437912  | -1.358597 | 0.295227  |
| C  | 5.625316  | -0.873601 | 0.885637  |
| C  | 4.358189  | -2.707563 | -0.115112 |
| C  | 6.725144  | -1.731979 | 1.054851  |
| H  | 5.685079  | 0.175566  | 1.216904  |
| C  | 5.462940  | -3.559296 | 0.050699  |
| H  | 3.420061  | -3.084473 | -0.555803 |
| C  | 6.646359  | -3.072677 | 0.635561  |
| H  | 7.649037  | -1.351764 | 1.519037  |
| H  | 5.395852  | -4.610893 | -0.269883 |
| H  | 7.509491  | -3.743447 | 0.771978  |
| C  | 3.113656  | 1.064493  | 1.248788  |
| C  | 3.684003  | 2.317290  | 0.941369  |
| C  | 2.574619  | 0.838847  | 2.534887  |
| C  | 3.714621  | 3.333212  | 1.912982  |
| H  | 4.085774  | 2.506422  | -0.066345 |
| C  | 2.608476  | 1.855501  | 3.501974  |
| H  | 2.103127  | -0.131035 | 2.764448  |
| C  | 3.175364  | 3.106030  | 3.191345  |
| H  | 4.153657  | 4.312422  | 1.664414  |
| H  | 2.177339  | 1.676002  | 4.499488  |
| H  | 3.189864  | 3.907464  | 3.946863  |
| Au | 0.805886  | -1.181398 | 0.035394  |
| H  | -1.532422 | -1.570614 | -1.107226 |
| H  | -1.849022 | -0.452342 | 1.752549  |
| H  | -2.457638 | 1.010971  | -1.690648 |
| C  | -5.743032 | 0.650311  | 0.884807  |
| C  | -6.427739 | -0.344498 | 0.124611  |
| C  | -4.353488 | 0.613385  | 1.040005  |
| C  | -5.622168 | -1.365829 | -0.452424 |
| C  | -3.552744 | -0.394947 | 0.457954  |
| H  | -3.865561 | 1.414201  | 1.621141  |
| C  | -4.227661 | -1.379279 | -0.287683 |
| H  | -6.082892 | -2.178386 | -1.031531 |
| H  | -3.656817 | -2.196388 | -0.753922 |
| H  | -6.298150 | 1.477777  | 1.348475  |
| N  | -7.811618 | -0.314283 | -0.043436 |
| C  | -8.644231 | 0.670051  | 0.638395  |
| H  | -9.648059 | 0.217772  | 0.796620  |
| H  | -8.243635 | 0.851073  | 1.659387  |
| C  | -8.492546 | -1.254790 | -0.926160 |
| H  | -9.404025 | -0.754687 | -1.321658 |
| H  | -7.858389 | -1.450524 | -1.818099 |
| C  | -8.879220 | -2.576424 | -0.242666 |
| H  | -9.401453 | -3.255349 | -0.949604 |
| H  | -7.980818 | -3.099894 | 0.143332  |
| H  | -9.555019 | -2.391234 | 0.618531  |
| C  | -8.784860 | 1.997500  | -0.124736 |
| H  | -7.794144 | 2.472210  | -0.278132 |
| H  | -9.235253 | 1.830762  | -1.125725 |
| H  | -9.431676 | 2.711133  | 0.428255  |



---

**[(PPh<sub>3</sub>)Au(*ortho*-N,N-diethylaniline)+(PPh<sub>3</sub>)Au(alkene)]<sup>+</sup> adduct**

-3096.68109008 A.U.

|    |           |           |           |
|----|-----------|-----------|-----------|
| P  | 2.227317  | -1.500513 | 0.479355  |
| H  | -0.693351 | 0.755970  | -2.957413 |
| C  | 0.397786  | 0.904446  | -2.911613 |
| C  | 0.916610  | 1.931430  | -2.123752 |
| C  | 3.323789  | 1.982243  | -2.941620 |
| C  | 2.298821  | 2.434829  | -2.072386 |
| C  | 4.629437  | 2.467109  | -2.803981 |
| C  | 2.617101  | 3.378484  | -1.064917 |
| C  | 4.934670  | 3.409049  | -1.798739 |
| H  | 5.419419  | 2.115093  | -3.485170 |
| C  | 3.926804  | 3.861434  | -0.929409 |
| H  | 1.833645  | 3.711743  | -0.368451 |
| H  | 5.963670  | 3.788701  | -1.698595 |
| H  | 4.155212  | 4.589241  | -0.135744 |
| C  | 3.951909  | -0.918521 | 0.681330  |
| C  | 4.967187  | -1.829076 | 1.055169  |
| C  | 4.252632  | 0.452401  | 0.523914  |
| C  | 6.274725  | -1.364707 | 1.270635  |
| H  | 4.735719  | -2.899398 | 1.174814  |
| C  | 5.562265  | 0.906970  | 0.747418  |
| H  | 3.470716  | 1.169759  | 0.227677  |
| C  | 6.572593  | 0.002521  | 1.119362  |
| H  | 7.065370  | -2.074990 | 1.558358  |
| H  | 5.787649  | 1.976236  | 0.618364  |
| H  | 7.599556  | 0.362321  | 1.288552  |
| C  | 2.349005  | -3.211779 | -0.176776 |
| C  | 1.649939  | -4.291900 | 0.399300  |
| C  | 3.113678  | -3.410803 | -1.349959 |
| C  | 1.710344  | -5.562315 | -0.202964 |
| H  | 1.061645  | -4.148574 | 1.318777  |
| C  | 3.183247  | -4.684653 | -1.933803 |
| H  | 3.657066  | -2.565814 | -1.802984 |
| C  | 2.474989  | -5.761398 | -1.365339 |
| H  | 1.161506  | -6.403529 | 0.248102  |
| H  | 3.787777  | -4.837462 | -2.841281 |
| H  | 2.523471  | -6.758806 | -1.829064 |
| C  | 1.512827  | -1.613084 | 2.163151  |
| C  | 2.316973  | -1.444927 | 3.311931  |
| C  | 0.125230  | -1.839451 | 2.306187  |
| C  | 1.733972  | -1.507800 | 4.588446  |
| H  | 3.395038  | -1.247587 | 3.212945  |
| C  | -0.446468 | -1.918085 | 3.584774  |
| H  | -0.520454 | -1.949005 | 1.422554  |
| C  | 0.355455  | -1.747294 | 4.726990  |
| H  | 2.363571  | -1.364671 | 5.480154  |
| H  | -1.526350 | -2.103321 | 3.678446  |
| H  | -0.097302 | -1.795001 | 5.729529  |
| Au | 1.053624  | -0.150752 | -0.991971 |
| H  | 0.989616  | 0.409227  | -3.699298 |
| H  | 0.202514  | 2.483498  | -1.487330 |
| H  | 3.095555  | 1.246386  | -3.727978 |
| P  | -2.785219 | -0.765501 | -0.319049 |
| C  | 0.487395  | 4.665720  | 1.755436  |
| C  | -0.425876 | 3.689887  | 1.299074  |
| C  | 1.743743  | 4.305783  | 2.273299  |
| C  | -0.078379 | 2.304794  | 1.347594  |
| C  | 2.086708  | 2.946257  | 2.359275  |
| H  | 2.438636  | 5.083935  | 2.626949  |
| C  | 1.181587  | 1.970330  | 1.904810  |
| H  | 3.057322  | 2.638061  | 2.780666  |
| H  | 1.464935  | 0.912105  | 2.003018  |
| C  | -2.030217 | -1.648340 | -1.745993 |
| C  | -2.410614 | -1.345052 | -3.070228 |
| C  | -0.942428 | -2.526925 | -1.521743 |
| C  | -1.702082 | -1.899867 | -4.151956 |
| H  | -3.259450 | -0.669224 | -3.259203 |
| C  | -0.248132 | -3.090670 | -2.605112 |
| H  | -0.646128 | -2.802752 | -0.498373 |
| C  | -0.618322 | -2.765574 | -3.922914 |
| H  | -2.006213 | -1.655573 | -5.181826 |
| H  | 0.587496  | -3.778594 | -2.410380 |

|    |           |           |           |
|----|-----------|-----------|-----------|
| H  | -0.068694 | -3.200012 | -4.772363 |
| C  | -4.341093 | -0.048313 | -0.978216 |
| C  | -5.497480 | -0.843089 | -1.139848 |
| C  | -4.358710 | 1.309303  | -1.365857 |
| C  | -6.661303 | -0.277925 | -1.685774 |
| H  | -5.491166 | -1.900825 | -0.831791 |
| C  | -5.525192 | 1.866455  | -1.916436 |
| H  | -3.460248 | 1.930574  | -1.226508 |
| C  | -6.676357 | 1.074789  | -2.074839 |
| H  | -7.564211 | -0.896755 | -1.805460 |
| H  | -5.535780 | 2.926410  | -2.214723 |
| H  | -7.592769 | 1.514290  | -2.498812 |
| C  | -3.322004 | -2.050054 | 0.877172  |
| C  | -3.420869 | -3.421158 | 0.558761  |
| C  | -3.696355 | -1.597423 | 2.163662  |
| C  | -3.882659 | -4.331695 | 1.526147  |
| H  | -3.141483 | -3.780043 | -0.444205 |
| C  | -4.173705 | -2.509737 | 3.118093  |
| H  | -3.607281 | -0.526774 | 2.413505  |
| C  | -4.261230 | -3.878654 | 2.802309  |
| H  | -3.955763 | -5.401706 | 1.276248  |
| H  | -4.471518 | -2.151286 | 4.115838  |
| H  | -4.628227 | -4.594641 | 3.554110  |
| Au | -1.320647 | 0.835569  | 0.602149  |
| H  | 0.173571  | 5.719771  | 1.706383  |
| N  | -1.705622 | 4.169533  | 0.825792  |
| C  | -1.843287 | 4.207956  | -0.628070 |
| H  | -1.726422 | 3.175024  | -1.073981 |
| H  | -2.889906 | 4.508340  | -0.853602 |
| C  | -2.879977 | 3.610872  | 1.503821  |
| H  | -3.763577 | 4.190839  | 1.157576  |
| H  | -3.074089 | 2.542519  | 1.187468  |
| C  | -2.777557 | 3.667162  | 3.026302  |
| H  | -1.964164 | 3.011487  | 3.398737  |
| H  | -2.566412 | 4.701275  | 3.367798  |
| H  | -3.728840 | 3.331374  | 3.486939  |
| C  | -0.882165 | 5.177219  | -1.317246 |
| H  | -1.045507 | 5.174022  | -2.414668 |
| H  | -1.033777 | 6.208666  | -0.939397 |
| H  | 0.177399  | 4.909428  | -1.133271 |

[(PPh<sub>3</sub>)Au(*ortho*-*N,N*-diethylaniline)--(PPh<sub>3</sub>)Au(alkene)]<sup>+</sup> TS Markovnikov  
-3096.63605427 A.U.

|   |           |           |           |
|---|-----------|-----------|-----------|
| P | 3.918057  | -0.990459 | -0.208530 |
| H | -0.756260 | 0.263679  | -1.171528 |
| C | 0.037587  | 1.008961  | -0.968533 |
| C | -0.069522 | 1.610658  | 0.380696  |
| C | 1.517225  | 3.539029  | -0.120930 |
| C | 0.963696  | 2.614525  | 0.794243  |
| C | 2.517252  | 4.436962  | 0.280041  |
| C | 1.443172  | 2.618271  | 2.123486  |
| C | 2.989421  | 4.425526  | 1.606371  |
| H | 2.939317  | 5.145900  | -0.449354 |
| C | 2.453032  | 3.507910  | 2.526559  |
| H | 1.023360  | 1.899323  | 2.845299  |
| H | 3.774972  | 5.129929  | 1.921747  |
| H | 2.820569  | 3.487339  | 3.564431  |
| C | 5.249561  | 0.284196  | -0.246134 |
| C | 6.585496  | 0.001188  | -0.602571 |
| C | 4.887100  | 1.607552  | 0.102485  |
| C | 7.549801  | 1.023801  | -0.583422 |
| H | 6.881138  | -1.011020 | -0.914890 |
| C | 5.859203  | 2.619223  | 0.132600  |
| H | 3.839021  | 1.862244  | 0.331791  |
| C | 7.192652  | 2.330226  | -0.206865 |
| H | 8.588428  | 0.794880  | -0.868923 |
| H | 5.559369  | 3.641160  | 0.410746  |
| H | 7.952760  | 3.126889  | -0.191476 |
| C | 4.478536  | -2.464138 | -1.136820 |
| C | 5.599342  | -3.234301 | -0.743121 |
| C | 3.736583  | -2.846897 | -2.276679 |
| C | 5.972965  | -4.363585 | -1.489827 |
| H | 6.173302  | -2.961727 | 0.156628  |
| C | 4.114898  | -3.978370 | -3.018813 |

---

|    |           |           |           |
|----|-----------|-----------|-----------|
| H  | 2.854907  | -2.254169 | -2.571617 |
| C  | 5.233147  | -4.735408 | -2.627765 |
| H  | 6.845681  | -4.958969 | -1.179184 |
| H  | 3.533290  | -4.269609 | -3.907307 |
| H  | 5.529436  | -5.622240 | -3.209534 |
| C  | 3.762452  | -1.507658 | 1.561524  |
| C  | 3.437129  | -0.502267 | 2.502753  |
| C  | 3.792456  | -2.856278 | 1.974489  |
| C  | 3.154201  | -0.844460 | 3.833478  |
| H  | 3.385060  | 0.553911  | 2.194736  |
| C  | 3.505543  | -3.193095 | 3.310401  |
| H  | 4.024639  | -3.656669 | 1.256338  |
| C  | 3.184459  | -2.191499 | 4.241791  |
| H  | 2.905055  | -0.052016 | 4.556794  |
| H  | 3.530970  | -4.249424 | 3.620463  |
| H  | 2.958315  | -2.458984 | 5.285706  |
| Au | 1.867035  | -0.044082 | -0.787677 |
| H  | 0.099241  | 1.739575  | -1.800385 |
| H  | -0.238974 | 0.858086  | 1.170834  |
| H  | 1.168862  | 3.540477  | -1.164231 |
| P  | -3.482144 | -1.477667 | 0.169559  |
| C  | -1.505611 | 4.981168  | 0.268644  |
| C  | -1.772619 | 3.677747  | -0.260113 |
| C  | -1.410268 | 5.210221  | 1.636512  |
| C  | -1.840497 | 2.549051  | 0.677449  |
| C  | -1.558479 | 4.155858  | 2.573781  |
| H  | -1.225622 | 6.236740  | 1.991504  |
| C  | -1.763252 | 2.876595  | 2.089384  |
| H  | -1.492805 | 4.352320  | 3.654144  |
| H  | -1.808655 | 2.041964  | 2.809048  |
| C  | -1.807668 | -2.254091 | 0.093462  |
| C  | -1.328074 | -2.925860 | -1.048852 |
| C  | -0.952897 | -2.064117 | 1.206326  |
| C  | -0.003355 | -3.401918 | -1.074496 |
| H  | -1.982732 | -3.076294 | -1.921215 |
| C  | 0.362992  | -2.545530 | 1.177413  |
| H  | -1.321286 | -1.527076 | 2.096392  |
| C  | 0.839606  | -3.213841 | 0.032435  |
| H  | 0.373006  | -3.920338 | -1.970118 |
| H  | 1.029456  | -2.385963 | 2.038688  |
| H  | 1.876584  | -3.580043 | 0.001394  |
| C  | -4.317981 | -1.920512 | -1.400866 |
| C  | -5.287731 | -2.942696 | -1.472749 |
| C  | -3.959627 | -1.208442 | -2.568883 |
| C  | -5.889512 | -3.248863 | -2.706276 |
| H  | -5.580093 | -3.496047 | -0.566605 |
| C  | -4.555676 | -1.527462 | -3.798570 |
| H  | -3.208391 | -0.404248 | -2.511840 |
| C  | -5.524234 | -2.546548 | -3.867830 |
| H  | -6.650657 | -4.042901 | -2.757336 |
| H  | -4.269556 | -0.973014 | -4.705994 |
| H  | -5.998965 | -2.790215 | -4.831032 |
| C  | -4.375499 | -2.326578 | 1.517661  |
| C  | -4.131773 | -3.686467 | 1.813173  |
| C  | -5.345955 | -1.604049 | 2.245441  |
| C  | -4.867326 | -4.319454 | 2.828501  |
| H  | -3.364424 | -4.244411 | 1.252844  |
| C  | -6.079695 | -2.245677 | 3.256901  |
| H  | -5.515520 | -0.538219 | 2.019837  |
| C  | -5.841442 | -3.601382 | 3.547199  |
| H  | -4.678034 | -5.378877 | 3.061716  |
| H  | -6.836079 | -1.682794 | 3.825524  |
| H  | -6.414681 | -4.100970 | 4.343812  |
| Au | -2.966081 | 0.760730  | 0.444112  |
| H  | -1.415213 | 5.843036  | -0.405178 |
| N  | -1.850854 | 3.511077  | -1.626672 |
| C  | -1.334428 | 4.541406  | -2.544389 |
| H  | -0.873351 | 4.003193  | -3.401490 |
| H  | -0.499332 | 5.064662  | -2.038482 |
| C  | -2.670219 | 2.462110  | -2.263394 |
| H  | -2.340620 | 2.388705  | -3.319683 |
| H  | -2.427697 | 1.486160  | -1.798921 |
| C  | -4.181182 | 2.711295  | -2.174693 |
| H  | -4.499587 | 2.793504  | -1.114582 |

---

|   |           |          |           |
|---|-----------|----------|-----------|
| H | -4.486225 | 3.636714 | -2.699787 |
| H | -4.729222 | 1.857081 | -2.623369 |
| C | -2.366081 | 5.552251 | -3.064317 |
| H | -1.859677 | 6.335243 | -3.665139 |
| H | -3.120287 | 5.069442 | -3.717129 |
| H | -2.904312 | 6.047497 | -2.230918 |

**[(PPh<sub>3</sub>)Au(*ortho*-N,N-diethylaniline-alkene)Au(PPh<sub>3</sub>)]<sup>+</sup> Intermediate Markovnikov**  
-3096.66968724 A.U.

|    |           |           |           |
|----|-----------|-----------|-----------|
| P  | 4.056811  | -0.916037 | 0.050082  |
| H  | -0.523648 | -0.269712 | -1.779691 |
| C  | 0.256914  | 0.521991  | -1.675486 |
| C  | -0.211889 | 1.612098  | -0.685210 |
| C  | 1.178766  | 3.605814  | -1.468562 |
| C  | 0.859119  | 2.679468  | -0.456981 |
| C  | 2.192883  | 4.560571  | -1.271714 |
| C  | 1.569156  | 2.730623  | 0.760680  |
| C  | 2.892658  | 4.607271  | -0.052445 |
| H  | 2.434404  | 5.275804  | -2.073648 |
| C  | 2.576411  | 3.687222  | 0.965005  |
| H  | 1.337475  | 1.995872  | 1.548784  |
| H  | 3.681144  | 5.359196  | 0.106772  |
| H  | 3.117882  | 3.718610  | 1.923832  |
| C  | 5.380517  | 0.277975  | -0.416072 |
| C  | 6.751168  | -0.058293 | -0.422183 |
| C  | 4.980653  | 1.593481  | -0.750257 |
| C  | 7.709950  | 0.916498  | -0.746293 |
| H  | 7.076493  | -1.083401 | -0.188610 |
| C  | 5.946157  | 2.565974  | -1.056713 |
| H  | 3.911173  | 1.860297  | -0.773144 |
| C  | 7.311131  | 2.229620  | -1.056476 |
| H  | 8.777579  | 0.646568  | -0.757084 |
| H  | 5.619565  | 3.587668  | -1.305777 |
| H  | 8.067812  | 2.989413  | -1.307669 |
| C  | 4.705783  | -2.608753 | -0.218573 |
| C  | 5.693319  | -3.187840 | 0.612724  |
| C  | 4.195194  | -3.343493 | -1.312188 |
| C  | 6.165638  | -4.482972 | 0.344367  |
| H  | 6.083716  | -2.630844 | 1.479328  |
| C  | 4.674459  | -4.637689 | -1.577518 |
| H  | 3.418002  | -2.891505 | -1.950733 |
| C  | 5.658886  | -5.207364 | -0.750673 |
| H  | 6.934228  | -4.929991 | 0.994167  |
| H  | 4.276136  | -5.204017 | -2.433848 |
| H  | 6.032333  | -6.222472 | -0.957939 |
| C  | 3.882535  | -0.729541 | 1.880510  |
| C  | 3.908176  | 0.568036  | 2.439605  |
| C  | 3.561368  | -1.829963 | 2.706156  |
| C  | 3.607255  | 0.759381  | 3.797852  |
| H  | 4.162193  | 1.434047  | 1.809299  |
| C  | 3.265457  | -1.633301 | 4.066467  |
| H  | 3.544693  | -2.849411 | 2.290984  |
| C  | 3.281455  | -0.338716 | 4.615009  |
| H  | 3.635474  | 1.775356  | 4.222794  |
| H  | 3.023996  | -2.500646 | 4.700899  |
| H  | 3.050778  | -0.186806 | 5.681028  |
| Au | 2.026159  | -0.325432 | -0.948248 |
| H  | 0.440089  | 0.950148  | -2.686531 |
| H  | -0.343116 | 1.099624  | 0.287501  |
| H  | 0.628823  | 3.579183  | -2.423565 |
| P  | -3.561899 | -1.431711 | 0.119246  |
| C  | -3.075525 | 4.215558  | -0.658145 |
| C  | -3.585076 | 4.093882  | -1.963893 |
| C  | -2.096146 | 3.333359  | -0.141225 |
| C  | -3.136091 | 3.074230  | -2.808792 |
| C  | -1.548770 | 2.313697  | -1.025915 |
| H  | -4.356614 | 4.799878  | -2.308917 |
| C  | -2.121448 | 2.195635  | -2.342541 |
| H  | -3.526855 | 2.963175  | -3.830715 |
| H  | -1.624113 | 1.524269  | -3.061597 |
| C  | -4.518007 | -2.652412 | -0.845151 |
| C  | -5.029833 | -3.804514 | -0.206603 |
| C  | -4.700220 | -2.468138 | -2.232447 |
| C  | -5.716220 | -4.768286 | -0.961584 |

|    |           |           |           |
|----|-----------|-----------|-----------|
| H  | -4.897434 | -3.945083 | 0.878210  |
| C  | -5.387585 | -3.438800 | -2.980591 |
| H  | -4.306744 | -1.562523 | -2.722948 |
| C  | -5.894062 | -4.586885 | -2.346324 |
| H  | -6.118657 | -5.665075 | -0.465557 |
| H  | -5.532269 | -3.293939 | -4.062297 |
| H  | -6.436781 | -5.344118 | -2.933351 |
| C  | -4.395118 | -1.230047 | 1.733965  |
| C  | -3.995041 | -1.957910 | 2.875503  |
| C  | -5.483253 | -0.332380 | 1.810147  |
| C  | -4.680973 | -1.777576 | 4.089307  |
| H  | -3.146293 | -2.657413 | 2.820347  |
| C  | -6.167570 | -0.165182 | 3.023187  |
| H  | -5.783904 | 0.244267  | 0.919963  |
| C  | -5.763752 | -0.883374 | 4.164361  |
| H  | -4.366415 | -2.341137 | 4.981420  |
| H  | -7.013737 | 0.536628  | 3.081623  |
| H  | -6.296060 | -0.743824 | 5.118115  |
| C  | -1.903228 | -2.158691 | 0.421463  |
| C  | -1.430248 | -3.226704 | -0.368151 |
| C  | -1.038874 | -1.524991 | 1.345993  |
| C  | -0.098440 | -3.657649 | -0.229179 |
| H  | -2.096230 | -3.716523 | -1.095543 |
| C  | 0.285987  | -1.960744 | 1.478682  |
| H  | -1.405271 | -0.684976 | 1.957291  |
| C  | 0.758160  | -3.026101 | 0.686247  |
| H  | 0.273236  | -4.486725 | -0.850615 |
| H  | 0.964581  | -1.460626 | 2.186039  |
| H  | 1.805632  | -3.353119 | 0.770504  |
| Au | -3.075451 | 0.548564  | -0.926772 |
| H  | -3.470494 | 5.010965  | -0.010237 |
| N  | -1.601190 | 3.472851  | 1.159349  |
| C  | -1.753240 | 2.344748  | 2.090536  |
| H  | -1.447049 | 1.413269  | 1.577278  |
| H  | -1.026362 | 2.485680  | 2.918857  |
| C  | -1.594572 | 4.806180  | 1.779496  |
| H  | -2.626612 | 5.207359  | 1.937680  |
| H  | -1.174800 | 4.668281  | 2.797779  |
| C  | -3.181618 | 2.179380  | 2.626155  |
| H  | -3.267565 | 1.275151  | 3.264260  |
| H  | -3.502237 | 3.055895  | 3.225451  |
| H  | -3.893556 | 2.057036  | 1.782749  |
| C  | -0.729105 | 5.805424  | 1.007408  |
| H  | -1.119031 | 5.989452  | -0.014126 |
| H  | -0.702226 | 6.778774  | 1.537915  |
| H  | 0.305893  | 5.421992  | 0.906867  |

**[(PPh<sub>3</sub>)Au(*ortho*-*N,N*-diethylaniline-alkene)] Markovnikov**  
-1925.11756015 A.U.

|   |           |           |           |
|---|-----------|-----------|-----------|
| P | 2.506451  | -0.153920 | 0.133536  |
| H | -1.615880 | -3.079260 | 0.140907  |
| C | -1.398363 | -2.121386 | -0.381533 |
| C | -2.410948 | -1.029239 | 0.050781  |
| C | -2.148610 | 0.600542  | -1.899882 |
| C | -2.007306 | 0.332949  | -0.523260 |
| C | -1.710843 | 1.822001  | -2.443893 |
| C | -1.419760 | 1.321079  | 0.294742  |
| C | -1.118562 | 2.795550  | -1.617803 |
| H | -1.834647 | 2.015766  | -3.521771 |
| C | -0.970399 | 2.537681  | -0.241232 |
| H | -1.301985 | 1.121151  | 1.371397  |
| H | -0.767487 | 3.748042  | -2.045368 |
| H | -0.495875 | 3.281117  | 0.419075  |
| C | 2.973977  | 0.569009  | -1.493397 |
| C | 4.307057  | 0.680181  | -1.939292 |
| C | 1.917289  | 1.051598  | -2.300086 |
| C | 4.580063  | 1.276121  | -3.184297 |
| H | 5.132233  | 0.301608  | -1.315503 |
| C | 2.199189  | 1.656608  | -3.533829 |
| H | 0.872739  | 0.960656  | -1.959779 |
| C | 3.529821  | 1.767883  | -3.979727 |
| H | 5.622037  | 1.357390  | -3.532633 |
| H | 1.368365  | 2.036795  | -4.149015 |
| H | 3.748921  | 2.235607  | -4.952836 |

---

|    |           |           |           |
|----|-----------|-----------|-----------|
| C  | 4.054430  | -0.883031 | 0.802721  |
| C  | 5.021436  | -0.115701 | 1.488266  |
| C  | 4.275226  | -2.261222 | 0.587500  |
| C  | 6.204102  | -0.723538 | 1.943030  |
| H  | 4.845280  | 0.956940  | 1.668992  |
| C  | 5.462314  | -2.861915 | 1.038596  |
| H  | 3.504483  | -2.858505 | 0.072279  |
| C  | 6.427163  | -2.094030 | 1.715699  |
| H  | 6.955652  | -0.123369 | 2.480187  |
| H  | 5.630249  | -3.937080 | 0.868540  |
| H  | 7.354625  | -2.567550 | 2.075015  |
| C  | 2.176382  | 1.331373  | 1.176385  |
| C  | 2.608767  | 2.622995  | 0.809884  |
| C  | 1.411663  | 1.158954  | 2.351360  |
| C  | 2.280052  | 3.729280  | 1.613052  |
| H  | 3.186208  | 2.766350  | -0.116801 |
| C  | 1.087739  | 2.265685  | 3.151546  |
| H  | 1.045506  | 0.154115  | 2.619348  |
| C  | 1.518237  | 3.553617  | 2.781694  |
| H  | 2.614306  | 4.736351  | 1.317276  |
| H  | 0.482827  | 2.124408  | 4.061088  |
| H  | 1.253120  | 4.423430  | 3.403399  |
| Au | 0.549774  | -1.424739 | -0.061205 |
| H  | -1.485469 | -2.317011 | -1.475189 |
| H  | -2.324594 | -0.935117 | 1.153637  |
| H  | -2.617520 | -0.158298 | -2.546907 |
| C  | -6.228605 | -0.597316 | -0.257072 |
| C  | -6.581734 | -1.666379 | -1.097054 |
| C  | -4.895439 | -0.414586 | 0.173847  |
| C  | -5.598674 | -2.579972 | -1.506007 |
| C  | -3.881667 | -1.313552 | -0.281909 |
| H  | -7.628775 | -1.790286 | -1.417876 |
| C  | -4.265258 | -2.395693 | -1.096609 |
| H  | -5.862191 | -3.430383 | -2.154937 |
| H  | -3.494682 | -3.100805 | -1.442003 |
| H  | -7.002592 | 0.108462  | 0.081598  |
| N  | -4.532398 | 0.665177  | 1.034669  |
| C  | -4.313357 | 0.304118  | 2.439816  |
| H  | -3.680001 | -0.607915 | 2.468715  |
| H  | -3.711002 | 1.114200  | 2.912169  |
| C  | -5.181893 | 1.959565  | 0.825378  |
| H  | -6.284860 | 1.936086  | 1.031478  |
| H  | -4.756762 | 2.650824  | 1.586676  |
| C  | -5.593901 | 0.048180  | 3.253565  |
| H  | -5.347435 | -0.271947 | 4.287909  |
| H  | -6.225787 | 0.958033  | 3.325108  |
| H  | -6.200192 | -0.752750 | 2.780788  |
| C  | -4.925692 | 2.527917  | -0.572410 |
| H  | -5.302650 | 1.842938  | -1.359225 |
| H  | -5.440927 | 3.503474  | -0.693482 |
| H  | -3.840726 | 2.671539  | -0.744195 |

**[(PPh<sub>3</sub>)Au(*para*-aniline)--(PPh<sub>3</sub>)Au(alkene)]<sup>+</sup> TS anti-Markovnikov**

-3096.63717109 A.U.

|   |           |           |           |
|---|-----------|-----------|-----------|
| P | -4.284764 | -0.328124 | -0.173793 |
| H | 0.403732  | -0.360363 | 0.128667  |
| C | 0.039982  | 0.651217  | 0.392318  |
| C | 0.352182  | 1.632772  | -0.612714 |
| C | 0.899236  | 0.003064  | 2.650367  |
| C | 0.248748  | 0.959212  | 1.837130  |
| C | 1.209935  | 0.286037  | 3.990180  |
| C | -0.108772 | 2.201860  | 2.412939  |
| C | 0.862396  | 1.530189  | 4.546819  |
| H | 1.730373  | -0.470656 | 4.598848  |
| C | 0.195902  | 2.484146  | 3.752619  |
| H | -0.627414 | 2.954306  | 1.797624  |
| H | 1.102496  | 1.755029  | 5.597718  |
| H | -0.088454 | 3.456643  | 4.184841  |
| C | -5.476824 | 0.712507  | 0.747364  |
| C | -6.611406 | 0.154894  | 1.376226  |
| C | -5.256510 | 2.107156  | 0.790424  |
| C | -7.523006 | 0.994807  | 2.038662  |
| H | -6.777442 | -0.933852 | 1.353911  |
| C | -6.174504 | 2.939396  | 1.450242  |

---

|    |           |           |           |
|----|-----------|-----------|-----------|
| H  | -4.359748 | 2.534703  | 0.311870  |
| C  | -7.306822 | 2.384060  | 2.074614  |
| H  | -8.406080 | 0.559983  | 2.532296  |
| H  | -6.001729 | 4.026302  | 1.484423  |
| H  | -8.022029 | 3.037785  | 2.597841  |
| C  | -4.500454 | -2.030906 | 0.481952  |
| C  | -5.153196 | -3.044590 | -0.250187 |
| C  | -3.939819 | -2.323154 | 1.746629  |
| C  | -5.236344 | -4.345284 | 0.279650  |
| H  | -5.587084 | -2.823223 | -1.237799 |
| C  | -4.038357 | -3.619614 | 2.273894  |
| H  | -3.412981 | -1.535589 | 2.310555  |
| C  | -4.679971 | -4.634163 | 1.537782  |
| H  | -5.740364 | -5.136676 | -0.296656 |
| H  | -3.604031 | -3.842478 | 3.261112  |
| H  | -4.746263 | -5.653904 | 1.948021  |
| C  | -4.876714 | -0.394708 | -1.907136 |
| C  | -6.237838 | -0.209879 | -2.233154 |
| C  | -3.941308 | -0.695552 | -2.922185 |
| C  | -6.656911 | -0.337198 | -3.568574 |
| H  | -6.968206 | 0.035862  | -1.445984 |
| C  | -4.368416 | -0.826411 | -4.253097 |
| H  | -2.877131 | -0.816664 | -2.660335 |
| C  | -5.726285 | -0.648489 | -4.576514 |
| H  | -7.718038 | -0.189994 | -3.823280 |
| H  | -3.637854 | -1.059531 | -5.043391 |
| H  | -6.060077 | -0.745344 | -5.621427 |
| Au | -2.058618 | 0.310193  | 0.039747  |
| H  | 0.119157  | 2.696867  | -0.450139 |
| H  | 0.347481  | 1.308180  | -1.664637 |
| H  | 1.176661  | -0.966920 | 2.211244  |
| P  | 3.243364  | -2.166633 | -0.212438 |
| C  | 2.515087  | 4.273144  | -1.828829 |
| C  | 2.480483  | 5.053480  | -0.623116 |
| C  | 2.573597  | 2.885736  | -1.784814 |
| C  | 2.521545  | 4.331487  | 0.615499  |
| C  | 2.566251  | 2.140401  | -0.557210 |
| H  | 2.589180  | 2.337407  | -2.741516 |
| C  | 2.574241  | 2.942309  | 0.637548  |
| H  | 2.532968  | 4.869881  | 1.572786  |
| H  | 2.612770  | 2.441977  | 1.617297  |
| C  | 3.782221  | -2.781346 | 1.430594  |
| C  | 4.023919  | -4.154939 | 1.655916  |
| C  | 3.911151  | -1.860527 | 2.493724  |
| C  | 4.379322  | -4.601005 | 2.939127  |
| H  | 3.941618  | -4.875377 | 0.826533  |
| C  | 4.263382  | -2.314555 | 3.776234  |
| H  | 3.735053  | -0.787627 | 2.313805  |
| C  | 4.495508  | -3.683176 | 4.000099  |
| H  | 4.572024  | -5.671449 | 3.111433  |
| H  | 4.366991  | -1.591881 | 4.600745  |
| H  | 4.777961  | -4.037037 | 5.004021  |
| C  | 4.157353  | -3.140536 | -1.465599 |
| C  | 3.693475  | -4.390047 | -1.933219 |
| C  | 5.378586  | -2.616355 | -1.944061 |
| C  | 4.457180  | -5.113277 | -2.864912 |
| H  | 2.730855  | -4.791938 | -1.578188 |
| C  | 6.138685  | -3.347670 | -2.871266 |
| H  | 5.725547  | -1.630879 | -1.591439 |
| C  | 5.679373  | -4.595547 | -3.330998 |
| H  | 4.094289  | -6.086669 | -3.230572 |
| H  | 7.090593  | -2.937370 | -3.242709 |
| H  | 6.274023  | -5.164877 | -4.062437 |
| C  | 1.477665  | -2.688257 | -0.370731 |
| C  | 0.733869  | -3.181148 | 0.721636  |
| C  | 0.822302  | -2.419251 | -1.596386 |
| C  | -0.652129 | -3.387189 | 0.593192  |
| H  | 1.235568  | -3.397515 | 1.677726  |
| C  | -0.556131 | -2.646642 | -1.723070 |
| H  | 1.397389  | -2.019665 | -2.447809 |
| C  | -1.299711 | -3.121589 | -0.625029 |
| H  | -1.235688 | -3.755321 | 1.450386  |
| H  | -1.055946 | -2.447939 | -2.683920 |
| H  | -2.383287 | -3.289154 | -0.715120 |

---

|    |          |          |           |
|----|----------|----------|-----------|
| Au | 3.139729 | 0.151684 | -0.444924 |
| H  | 2.489709 | 4.768351 | -2.809077 |
| N  | 2.414949 | 6.424941 | -0.656439 |
| C  | 2.486503 | 7.177637 | -1.914666 |
| H  | 2.946549 | 8.161889 | -1.685526 |
| H  | 3.196262 | 6.675575 | -2.604051 |
| C  | 2.285475 | 7.225685 | 0.567135  |
| H  | 1.735203 | 8.152673 | 0.299277  |
| H  | 1.630528 | 6.690931 | 1.286111  |
| C  | 1.119019 | 7.375659 | -2.582199 |
| H  | 0.655385 | 6.401977 | -2.841945 |
| H  | 0.422010 | 7.913981 | -1.906976 |
| H  | 1.220448 | 7.970603 | -3.512956 |
| C  | 3.633644 | 7.576306 | 1.210644  |
| H  | 4.187966 | 6.661062 | 1.501649  |
| H  | 4.272914 | 8.149034 | 0.507498  |
| H  | 3.484013 | 8.196432 | 2.118203  |

**[(PPh<sub>3</sub>)Au(*para*-N,N-diethylaniline-alkene)Au(PPh<sub>3</sub>)]<sup>+</sup> Intermediate anti-Markovnikov**

-3096.68796070 A.U.

|    |           |           |           |
|----|-----------|-----------|-----------|
| P  | -4.519480 | 0.199137  | -0.370599 |
| H  | 0.164488  | 0.942241  | -0.243922 |
| C  | -0.414744 | 1.678937  | 0.357441  |
| C  | 0.078407  | 3.094696  | -0.036982 |
| C  | -0.086189 | -0.052725 | 2.180267  |
| C  | -0.296847 | 1.303678  | 1.813014  |
| C  | -0.041795 | -0.455972 | 3.523898  |
| C  | -0.444310 | 2.237791  | 2.870094  |
| C  | -0.184697 | 0.488858  | 4.556824  |
| H  | 0.104828  | -1.521586 | 3.764280  |
| C  | -0.385379 | 1.839434  | 4.216060  |
| H  | -0.623431 | 3.299318  | 2.637306  |
| H  | -0.149788 | 0.177652  | 5.612396  |
| H  | -0.506730 | 2.593963  | 5.009980  |
| C  | -5.826745 | 0.944365  | 0.681117  |
| C  | -6.801104 | 0.161693  | 1.337889  |
| C  | -5.850889 | 2.351326  | 0.805918  |
| C  | -7.800574 | 0.787702  | 2.102621  |
| H  | -6.773117 | -0.936909 | 1.260390  |
| C  | -6.854921 | 2.969733  | 1.568223  |
| H  | -5.073725 | 2.957002  | 0.310845  |
| C  | -7.830335 | 2.189175  | 2.215742  |
| H  | -8.558630 | 0.175579  | 2.615981  |
| H  | -6.871143 | 4.066574  | 1.664543  |
| H  | -8.613328 | 2.675695  | 2.818260  |
| C  | -4.412888 | -1.551859 | 0.199846  |
| C  | -4.944973 | -2.635846 | -0.527876 |
| C  | -3.726112 | -1.793118 | 1.413523  |
| C  | -4.799217 | -3.948748 | -0.040926 |
| H  | -5.469802 | -2.460970 | -1.479983 |
| C  | -3.594062 | -3.102661 | 1.899348  |
| H  | -3.278261 | -0.953793 | 1.971704  |
| C  | -4.129443 | -4.184052 | 1.172936  |
| H  | -5.215159 | -4.791340 | -0.615283 |
| H  | -3.060663 | -3.279570 | 2.846380  |
| H  | -4.020448 | -5.212395 | 1.551742  |
| C  | -5.234519 | 0.135082  | -2.061294 |
| C  | -6.604465 | -0.136695 | -2.274581 |
| C  | -4.381945 | 0.346323  | -3.167374 |
| C  | -7.107365 | -0.218673 | -3.583510 |
| H  | -7.279103 | -0.276691 | -1.414901 |
| C  | -4.890480 | 0.262127  | -4.474752 |
| H  | -3.321913 | 0.593627  | -2.992790 |
| C  | -6.251314 | -0.024373 | -4.683489 |
| H  | -8.175980 | -0.429353 | -3.746074 |
| H  | -4.223484 | 0.431996  | -5.334499 |
| H  | -6.650411 | -0.085053 | -5.708115 |
| Au | -2.399502 | 1.151447  | -0.126091 |
| H  | -0.302984 | 3.855133  | 0.677147  |
| H  | -0.340825 | 3.379699  | -1.022561 |
| H  | -0.007436 | -0.805191 | 1.381799  |
| P  | 2.601560  | -1.712273 | -0.167695 |
| C  | 3.654048  | 3.220605  | -1.501308 |
| C  | 4.495259  | 2.839681  | -0.409944 |



---

|    |           |           |           |
|----|-----------|-----------|-----------|
| C  | 2.268180  | 3.345290  | -1.349491 |
| C  | 3.819658  | 2.572002  | 0.851321  |
| C  | 1.592027  | 3.131955  | -0.123121 |
| H  | 1.674394  | 3.627274  | -2.234969 |
| C  | 2.404887  | 2.796968  | 0.982644  |
| H  | 4.411056  | 2.493761  | 1.777157  |
| H  | 1.957867  | 2.700753  | 1.984375  |
| C  | 2.671660  | -2.936456 | 1.189853  |
| C  | 2.775562  | -4.315501 | 0.899352  |
| C  | 2.582327  | -2.498004 | 2.528099  |
| C  | 2.778191  | -5.248489 | 1.948595  |
| H  | 2.859963  | -4.658615 | -0.144092 |
| C  | 2.585239  | -3.438534 | 3.571768  |
| H  | 2.498292  | -1.422022 | 2.749484  |
| C  | 2.681420  | -4.811494 | 3.283244  |
| H  | 2.861109  | -6.323039 | 1.723175  |
| H  | 2.515321  | -3.093652 | 4.615122  |
| H  | 2.688267  | -5.546715 | 4.103082  |
| C  | 3.753304  | -2.313513 | -1.463249 |
| C  | 3.300431  | -3.127390 | -2.524108 |
| C  | 5.123914  | -1.988672 | -1.356896 |
| C  | 4.220295  | -3.617653 | -3.467480 |
| H  | 2.230507  | -3.371506 | -2.618191 |
| C  | 6.036088  | -2.485637 | -2.300606 |
| H  | 5.472162  | -1.341452 | -0.536124 |
| C  | 5.585456  | -3.300097 | -3.356354 |
| H  | 3.865762  | -4.250569 | -4.295862 |
| H  | 7.104425  | -2.232770 | -2.214742 |
| H  | 6.301885  | -3.685105 | -4.098698 |
| C  | 0.926361  | -1.817246 | -0.904820 |
| C  | -0.057056 | -2.696901 | -0.406552 |
| C  | 0.615338  | -0.934471 | -1.964946 |
| C  | -1.345116 | -2.692609 | -0.969383 |
| H  | 0.174179  | -3.375975 | 0.428543  |
| C  | -0.670449 | -0.942010 | -2.523663 |
| H  | 1.376618  | -0.230121 | -2.339164 |
| C  | -1.651851 | -1.818799 | -2.024416 |
| H  | -2.117929 | -3.366330 | -0.571232 |
| H  | -0.912957 | -0.246962 | -3.342053 |
| H  | -2.667358 | -1.811570 | -2.448480 |
| Au | 3.090432  | 0.434966  | 0.478681  |
| H  | 4.093246  | 3.449373  | -2.480897 |
| N  | 5.855640  | 2.728971  | -0.531276 |
| C  | 6.523831  | 2.864909  | -1.832652 |
| H  | 7.435034  | 2.230672  | -1.803782 |
| H  | 5.881855  | 2.419530  | -2.621633 |
| C  | 6.717672  | 2.405495  | 0.611167  |
| H  | 7.711488  | 2.859440  | 0.414492  |
| H  | 6.339174  | 2.919786  | 1.518849  |
| C  | 6.897209  | 4.312615  | -2.174273 |
| H  | 5.997329  | 4.958489  | -2.229196 |
| H  | 7.572285  | 4.739630  | -1.404341 |
| H  | 7.419336  | 4.361574  | -3.151638 |
| C  | 6.864284  | 0.898218  | 0.860162  |
| H  | 5.883438  | 0.427816  | 1.085816  |
| H  | 7.288785  | 0.390794  | -0.030795 |
| H  | 7.539761  | 0.706755  | 1.718378  |

**[(PPh<sub>3</sub>)Au(*para*-*N,N*-diethylaniline -alkene)] anti-Markovnikov**  
-1925.11488118 A.U.

|   |           |           |           |
|---|-----------|-----------|-----------|
| P | 3.063643  | -0.241667 | 0.002894  |
| H | -1.641253 | -0.909138 | -1.291124 |
| C | -1.326753 | -0.541555 | -0.289251 |
| C | -2.134263 | -1.311618 | 0.784900  |
| C | -1.487461 | 1.709145  | -1.465560 |
| C | -1.439592 | 0.963344  | -0.259760 |
| C | -1.460840 | 3.112158  | -1.465321 |
| C | -1.399186 | 1.701712  | 0.952942  |
| C | -1.403276 | 3.824432  | -0.252512 |
| H | -1.489079 | 3.657052  | -2.423148 |
| C | -1.378694 | 3.105337  | 0.957576  |
| H | -1.346810 | 1.159129  | 1.909845  |
| H | -1.387607 | 4.926051  | -0.249657 |
| H | -1.337454 | 3.644538  | 1.918259  |

---

|    |           |           |           |
|----|-----------|-----------|-----------|
| C  | 3.766798  | -0.431524 | 1.692267  |
| C  | 4.666238  | 0.497110  | 2.257931  |
| C  | 3.384760  | -1.575371 | 2.429085  |
| C  | 5.188486  | 0.273289  | 3.544046  |
| H  | 4.954176  | 1.399039  | 1.695098  |
| C  | 3.915079  | -1.796870 | 3.710123  |
| H  | 2.660442  | -2.284557 | 1.994582  |
| C  | 4.818071  | -0.873442 | 4.268812  |
| H  | 5.887536  | 1.002717  | 3.983132  |
| H  | 3.613412  | -2.690063 | 4.279663  |
| H  | 5.227350  | -1.044188 | 5.277167  |
| C  | 3.307797  | 1.534719  | -0.434762 |
| C  | 4.536069  | 2.008715  | -0.947753 |
| C  | 2.233706  | 2.435895  | -0.247336 |
| C  | 4.690313  | 3.371300  | -1.255862 |
| H  | 5.370490  | 1.309038  | -1.116520 |
| C  | 2.395179  | 3.795587  | -0.559262 |
| H  | 1.257192  | 2.081718  | 0.124273  |
| C  | 3.621731  | 4.265878  | -1.061027 |
| H  | 5.649515  | 3.734200  | -1.658280 |
| H  | 1.540908  | 4.476487  | -0.420295 |
| H  | 3.743759  | 5.331654  | -1.312146 |
| C  | 4.234585  | -1.147545 | -1.089146 |
| C  | 5.535865  | -1.512488 | -0.682494 |
| C  | 3.791122  | -1.471470 | -2.391329 |
| C  | 6.387596  | -2.185413 | -1.576418 |
| H  | 5.882247  | -1.273694 | 0.335627  |
| C  | 4.648483  | -2.137655 | -3.281226 |
| H  | 2.765989  | -1.204899 | -2.698553 |
| C  | 5.947920  | -2.495167 | -2.875501 |
| H  | 7.401618  | -2.470208 | -1.253511 |
| H  | 4.296800  | -2.387455 | -4.294687 |
| H  | 6.617186  | -3.023755 | -3.572678 |
| Au | 0.778195  | -0.724050 | -0.163670 |
| H  | -1.814619 | -1.015747 | 1.806585  |
| H  | -1.889617 | -2.391328 | 0.693301  |
| H  | -1.524192 | 1.162811  | -2.422732 |
| C  | -5.724439 | -1.581128 | -0.574455 |
| C  | -6.443345 | -0.609123 | 0.181308  |
| C  | -4.359854 | -1.807558 | -0.352937 |
| C  | -5.706104 | 0.096606  | 1.175077  |
| C  | -3.628726 | -1.105057 | 0.627891  |
| H  | -3.845247 | -2.569059 | -0.964142 |
| C  | -4.342054 | -0.152116 | 1.382834  |
| H  | -6.192270 | 0.867789  | 1.788767  |
| H  | -3.813393 | 0.429934  | 2.155069  |
| H  | -6.235945 | -2.183675 | -1.338028 |
| N  | -7.798798 | -0.364537 | -0.040458 |
| C  | -8.512196 | -0.973546 | -1.156815 |
| H  | -9.315183 | -0.272103 | -1.474571 |
| H  | -7.831734 | -1.051013 | -2.032557 |
| C  | -8.557856 | 0.546995  | 0.807576  |
| H  | -9.618162 | 0.210629  | 0.808363  |
| H  | -8.218440 | 0.439520  | 1.860750  |
| C  | -9.121680 | -2.346564 | -0.829251 |
| H  | -8.334939 | -3.067709 | -0.526919 |
| H  | -9.843991 | -2.267671 | 0.010252  |
| H  | -9.659627 | -2.765159 | -1.706200 |
| C  | -8.477216 | 2.017676  | 0.365829  |
| H  | -7.426844 | 2.373823  | 0.367851  |
| H  | -8.870931 | 2.142104  | -0.664871 |
| H  | -9.069355 | 2.671758  | 1.040404  |

[(PPh<sub>3</sub>)Au(alkene)]<sup>+</sup> (aniline)<sup>+</sup> TS Markovnikov (where alkene = H<sub>2</sub>C=C(Ph(*p*Me))(Me))

-3096.64068991 A.U.

|   |           |           |           |
|---|-----------|-----------|-----------|
| P | 3.914039  | -1.204320 | -0.052101 |
| H | -0.682649 | -0.022487 | -0.803134 |
| C | 0.041239  | 0.820287  | -0.798656 |
| C | -0.262410 | 1.774197  | 0.323395  |
| C | 0.948924  | 3.656869  | -0.910030 |
| C | 0.465100  | 3.096917  | 0.298737  |
| C | 1.521232  | 4.934170  | -0.952456 |
| C | 0.619160  | 3.880509  | 1.466218  |
| C | 1.635620  | 5.726902  | 0.211925  |

---

|    |           |           |           |
|----|-----------|-----------|-----------|
| H  | 1.883949  | 5.330490  | -1.915786 |
| C  | 1.194453  | 5.161001  | 1.425093  |
| H  | 0.264237  | 3.499364  | 2.434285  |
| H  | 1.294493  | 5.736775  | 2.360107  |
| C  | 5.303272  | -0.104096 | 0.426651  |
| C  | 6.273436  | -0.494527 | 1.376212  |
| C  | 5.399592  | 1.157660  | -0.201237 |
| C  | 7.339744  | 0.368361  | 1.681232  |
| H  | 6.188984  | -1.467836 | 1.885818  |
| C  | 6.469566  | 2.013498  | 0.107122  |
| H  | 4.626272  | 1.468354  | -0.923297 |
| C  | 7.440364  | 1.619433  | 1.045993  |
| H  | 8.094744  | 0.062674  | 2.422430  |
| H  | 6.541160  | 2.997016  | -0.382953 |
| H  | 8.276156  | 2.293918  | 1.289700  |
| C  | 4.556676  | -2.291861 | -1.384076 |
| C  | 5.888642  | -2.761838 | -1.377283 |
| C  | 3.676471  | -2.691412 | -2.414427 |
| C  | 6.327907  | -3.635649 | -2.385244 |
| H  | 6.585025  | -2.439401 | -0.587137 |
| C  | 4.121692  | -3.567624 | -3.418710 |
| H  | 2.644528  | -2.303582 | -2.428234 |
| C  | 5.445323  | -4.042074 | -3.403437 |
| H  | 7.367710  | -3.998233 | -2.378653 |
| H  | 3.433828  | -3.873835 | -4.222406 |
| H  | 5.794798  | -4.724856 | -4.193682 |
| C  | 3.668283  | -2.303161 | 1.404877  |
| C  | 3.174385  | -1.703862 | 2.587108  |
| C  | 3.866440  | -3.697703 | 1.358418  |
| C  | 2.890319  | -2.493315 | 3.711495  |
| H  | 3.004286  | -0.614933 | 2.617521  |
| C  | 3.564695  | -4.486808 | 2.484100  |
| H  | 4.251297  | -4.171448 | 0.441774  |
| C  | 3.078577  | -3.888455 | 3.659249  |
| H  | 2.511381  | -2.020447 | 4.631058  |
| H  | 3.715326  | -5.576796 | 2.440649  |
| H  | 2.846180  | -4.509400 | 4.538459  |
| Au | 1.913617  | -0.096161 | -0.517564 |
| H  | 0.014220  | 1.287073  | -1.802938 |
| H  | 0.865238  | 3.082997  | -1.843392 |
| P  | -3.597213 | -1.747318 | 0.017642  |
| C  | -2.426818 | 4.686064  | 1.006436  |
| C  | -2.102096 | 5.269133  | -0.268965 |
| C  | -2.443728 | 3.312577  | 1.151418  |
| C  | -2.101813 | 4.397484  | -1.415204 |
| C  | -2.143924 | 2.401232  | 0.068488  |
| H  | -2.615578 | 2.903492  | 2.160554  |
| C  | -2.116761 | 3.029835  | -1.235352 |
| H  | -2.007663 | 4.808054  | -2.429030 |
| H  | -1.993629 | 2.389810  | -2.124629 |
| C  | -4.544098 | -2.323372 | -1.444452 |
| C  | -5.004518 | -3.655832 | -1.534107 |
| C  | -4.778248 | -1.425228 | -2.508458 |
| C  | -5.688857 | -4.082885 | -2.682807 |
| H  | -4.837187 | -4.359060 | -0.703381 |
| C  | -5.460671 | -1.860640 | -3.657692 |
| H  | -4.428997 | -0.382256 | -2.429944 |
| C  | -5.915538 | -3.187729 | -3.745323 |
| H  | -6.050977 | -5.120765 | -2.748064 |
| H  | -5.643923 | -1.156708 | -4.484344 |
| H  | -6.455647 | -3.526497 | -4.643264 |
| C  | -4.383704 | -2.496759 | 1.492140  |
| C  | -4.091322 | -3.815029 | 1.909230  |
| C  | -5.337965 | -1.729967 | 2.196748  |
| C  | -4.759132 | -4.360438 | 3.018237  |
| H  | -3.332753 | -4.409746 | 1.375740  |
| C  | -6.004548 | -2.283884 | 3.302039  |
| H  | -5.551530 | -0.696695 | 1.876564  |
| C  | -5.716351 | -3.598061 | 3.712481  |
| H  | -4.529146 | -5.387205 | 3.343227  |
| H  | -6.748499 | -1.684057 | 3.848982  |
| H  | -6.236746 | -4.029195 | 4.582002  |
| C  | -1.931586 | -2.525781 | -0.131582 |
| C  | -1.424667 | -2.891739 | -1.396304 |

---

|    |           |           |           |
|----|-----------|-----------|-----------|
| C  | -1.097169 | -2.604129 | 1.008214  |
| C  | -0.099044 | -3.344193 | -1.514675 |
| H  | -2.066493 | -2.824791 | -2.288766 |
| C  | 0.223517  | -3.061902 | 0.883153  |
| H  | -1.485056 | -2.310657 | 1.997018  |
| C  | 0.722630  | -3.433121 | -0.378914 |
| H  | 0.291880  | -3.632073 | -2.503214 |
| H  | 0.874522  | -3.121696 | 1.768316  |
| H  | 1.759419  | -3.788289 | -0.471488 |
| Au | -3.120261 | 0.523907  | 0.099444  |
| H  | -2.601207 | 5.324858  | 1.882347  |
| N  | -1.761038 | 6.580875  | -0.378901 |
| C  | -1.660487 | 7.420531  | 0.815547  |
| H  | -1.257336 | 8.408948  | 0.532712  |
| H  | -2.651464 | 7.576716  | 1.293836  |
| H  | -0.970225 | 6.963510  | 1.556183  |
| C  | -1.379951 | 7.140033  | -1.676040 |
| H  | -2.218841 | 7.097093  | -2.403054 |
| H  | -1.096878 | 8.199577  | -1.546834 |
| H  | -0.509850 | 6.593977  | -2.100123 |
| C  | -0.285003 | 1.083834  | 1.692361  |
| H  | -0.698979 | 0.062269  | 1.596052  |
| H  | 0.757629  | 0.990939  | 2.065350  |
| H  | -0.870974 | 1.626357  | 2.457194  |
| C  | 2.211577  | 7.121757  | 0.145606  |
| H  | 3.267331  | 7.108737  | -0.200183 |
| H  | 1.650490  | 7.753092  | -0.577217 |
| H  | 2.186318  | 7.628142  | 1.130959  |

**[(PPh<sub>3</sub>)Au(alkene)--(aniline)]<sup>+</sup> TS Markovnikov (where alkene = H<sub>2</sub>C=C(Ph(*p*OMe))(Me))**  
-3171.79769685 A.U.

|   |           |           |           |
|---|-----------|-----------|-----------|
| P | 3.753555  | -1.638636 | -0.037382 |
| H | -0.707963 | -0.040041 | -0.719957 |
| C | 0.079096  | 0.744105  | -0.719840 |
| C | -0.158531 | 1.723326  | 0.400479  |
| C | 1.227435  | 3.484760  | -0.821888 |
| C | 0.668740  | 2.983527  | 0.376414  |
| C | 1.895408  | 4.718238  | -0.885287 |
| C | 0.849428  | 3.778616  | 1.538224  |
| C | 2.011363  | 5.511487  | 0.277698  |
| H | 2.310147  | 5.052346  | -1.846617 |
| C | 1.510268  | 5.009157  | 1.499780  |
| H | 0.448182  | 3.437890  | 2.503090  |
| H | 1.647364  | 5.613683  | 2.409074  |
| C | 5.269303  | -0.706309 | 0.413839  |
| C | 6.203995  | -1.202860 | 1.348922  |
| C | 5.496604  | 0.536400  | -0.218140 |
| C | 7.364830  | -0.464817 | 1.636130  |
| H | 6.018150  | -2.160498 | 1.861151  |
| C | 6.661096  | 1.266170  | 0.070736  |
| H | 4.750183  | 0.932001  | -0.926795 |
| C | 7.595677  | 0.766252  | 0.995978  |
| H | 8.091750  | -0.852386 | 2.367053  |
| H | 6.835862  | 2.234993  | -0.422713 |
| H | 8.505463  | 1.342890  | 1.225469  |
| C | 4.244078  | -2.774264 | -1.395618 |
| C | 5.513176  | -3.394523 | -1.416938 |
| C | 3.311733  | -3.049670 | -2.420406 |
| C | 5.836521  | -4.293549 | -2.446533 |
| H | 6.252630  | -3.168957 | -0.632240 |
| C | 3.640639  | -3.951815 | -3.446455 |
| H | 2.331022  | -2.546585 | -2.412980 |
| C | 4.900676  | -4.575937 | -3.458966 |
| H | 6.827662  | -4.773282 | -2.461101 |
| H | 2.912116  | -4.161123 | -4.245432 |
| H | 5.159388  | -5.279110 | -4.266071 |
| C | 3.423710  | -2.720324 | 1.415381  |
| C | 3.003263  | -2.087101 | 2.608460  |
| C | 3.488764  | -4.127185 | 1.357280  |
| C | 2.659957  | -2.855484 | 3.730893  |
| H | 2.935591  | -0.987432 | 2.649114  |
| C | 3.127786  | -4.893509 | 2.481204  |
| H | 3.814006  | -4.628524 | 0.432148  |
| C | 2.714974  | -4.261583 | 3.666649  |

|    |           |           |           |
|----|-----------|-----------|-----------|
| H  | 2.338656  | -2.356402 | 4.658512  |
| H  | 3.172996  | -5.992476 | 2.427807  |
| H  | 2.435060  | -4.864886 | 4.544308  |
| Au | 1.870934  | -0.321631 | -0.454350 |
| H  | 0.077013  | 1.210583  | -1.724792 |
| H  | 1.134870  | 2.899295  | -1.747257 |
| P  | -3.767459 | -1.543107 | -0.016759 |
| C  | -2.112134 | 4.763929  | 1.090815  |
| C  | -1.717344 | 5.326645  | -0.174005 |
| C  | -2.230541 | 3.394475  | 1.224811  |
| C  | -1.787980 | 4.469817  | -1.329870 |
| C  | -1.979471 | 2.471216  | 0.138758  |
| H  | -2.447549 | 2.991645  | 2.227726  |
| C  | -1.906030 | 3.105830  | -1.161324 |
| H  | -1.665359 | 4.882729  | -2.339830 |
| H  | -1.828593 | 2.464944  | -2.055221 |
| C  | -4.730297 | -1.991121 | -1.512681 |
| C  | -5.402777 | -3.229206 | -1.609636 |
| C  | -4.752024 | -1.091550 | -2.601159 |
| C  | -6.084274 | -3.563077 | -2.791045 |
| H  | -5.404026 | -3.929797 | -0.759965 |
| C  | -5.431013 | -1.434698 | -3.782674 |
| H  | -4.239009 | -0.119186 | -2.514986 |
| C  | -6.096542 | -2.669495 | -3.878249 |
| H  | -6.612661 | -4.526604 | -2.862080 |
| H  | -5.447125 | -0.729905 | -4.628547 |
| H  | -6.634527 | -2.934937 | -4.801772 |
| C  | -4.642612 | -2.260752 | 1.422329  |
| C  | -4.467933 | -3.608875 | 1.808500  |
| C  | -5.539408 | -1.433744 | 2.134232  |
| C  | -5.195439 | -4.123031 | 2.894816  |
| H  | -3.755168 | -4.252004 | 1.268154  |
| C  | -6.265526 | -1.956185 | 3.217059  |
| H  | -5.661174 | -0.378617 | 1.838017  |
| C  | -6.094573 | -3.299737 | 3.597064  |
| H  | -5.057458 | -5.173287 | 3.195980  |
| H  | -6.964002 | -1.309308 | 3.770293  |
| H  | -6.661266 | -3.706684 | 4.449128  |
| C  | -2.175082 | -2.462725 | -0.162033 |
| C  | -1.703851 | -2.907725 | -1.414683 |
| C  | -1.349600 | -2.580382 | 0.981072  |
| C  | -0.420492 | -3.473648 | -1.517471 |
| H  | -2.338535 | -2.813954 | -2.309748 |
| C  | -0.072107 | -3.149458 | 0.871376  |
| H  | -1.712163 | -2.227146 | 1.960089  |
| C  | 0.392941  | -3.596285 | -0.379232 |
| H  | -0.056407 | -3.823733 | -2.496179 |
| H  | 0.573250  | -3.236003 | 1.758344  |
| H  | 1.397023  | -4.037878 | -0.461633 |
| Au | -3.099980 | 0.676014  | 0.132912  |
| H  | -2.255663 | 5.410010  | 1.967085  |
| N  | -1.247480 | 6.598955  | -0.266200 |
| C  | -1.103622 | 7.427332  | 0.931936  |
| H  | -0.541452 | 8.342410  | 0.675590  |
| H  | -2.090201 | 7.725794  | 1.348580  |
| H  | -0.530158 | 6.884419  | 1.711444  |
| C  | -0.814970 | 7.135798  | -1.556619 |
| H  | -1.665650 | 7.248252  | -2.263234 |
| H  | -0.362633 | 8.131239  | -1.401855 |
| H  | -0.051444 | 6.473490  | -2.016954 |
| C  | -0.228622 | 1.035874  | 1.769579  |
| H  | -0.734953 | 0.055919  | 1.679833  |
| H  | 0.806338  | 0.849131  | 2.128689  |
| H  | -0.753441 | 1.627558  | 2.542356  |
| O  | 2.573343  | 6.752491  | 0.324187  |
| C  | 3.175561  | 7.274498  | -0.854207 |
| H  | 4.005433  | 6.626842  | -1.217493 |
| H  | 2.436366  | 7.403590  | -1.678217 |
| H  | 3.585496  | 8.265436  | -0.582476 |

[(PPh<sub>3</sub>)Au(alkene)--(aniline)]<sup>+</sup> TS Markovnikov (where alkene = H<sub>2</sub>C=CH(Ph(pCF<sub>3</sub>)))  
-3354.86277862 A.U.

|   |           |          |           |
|---|-----------|----------|-----------|
| P | -2.644255 | 2.811417 | -0.016360 |
| H | 1.229123  | 0.047999 | -1.388093 |

---

|    |           |           |           |
|----|-----------|-----------|-----------|
| C  | 0.180447  | -0.309657 | -1.367478 |
| C  | -0.105257 | -1.198969 | -0.210103 |
| C  | -2.219782 | -2.202442 | -1.204288 |
| C  | -1.472616 | -1.786643 | -0.075048 |
| C  | -3.448621 | -2.854763 | -1.056811 |
| C  | -2.030221 | -2.002573 | 1.205374  |
| C  | -3.957317 | -3.113615 | 0.231167  |
| H  | -4.013237 | -3.177576 | -1.944886 |
| C  | -3.261035 | -2.655541 | 1.364488  |
| H  | -1.472495 | -1.669683 | 2.094888  |
| H  | -3.675442 | -2.830765 | 2.367721  |
| C  | -4.355417 | 2.154376  | -0.226681 |
| C  | -5.491732 | 2.984621  | -0.336482 |
| C  | -4.515862 | 0.748244  | -0.267328 |
| C  | -6.769843 | 2.413690  | -0.462496 |
| H  | -5.388748 | 4.079653  | -0.342576 |
| C  | -5.796896 | 0.184579  | -0.379409 |
| H  | -3.635358 | 0.086071  | -0.229119 |
| C  | -6.926282 | 1.016560  | -0.475228 |
| H  | -7.649702 | 3.069522  | -0.554436 |
| H  | -5.907698 | -0.909561 | -0.404256 |
| H  | -7.930187 | 0.574521  | -0.572400 |
| C  | -2.613056 | 4.557923  | -0.558387 |
| C  | -3.335391 | 5.574102  | 0.112249  |
| C  | -1.824605 | 4.888971  | -1.683005 |
| C  | -3.275062 | 6.899090  | -0.348491 |
| H  | -3.933268 | 5.334020  | 1.005723  |
| C  | -1.769082 | 6.216998  | -2.139326 |
| H  | -1.252048 | 4.097956  | -2.195042 |
| C  | -2.494654 | 7.221038  | -1.474574 |
| H  | -3.838672 | 7.686093  | 0.176497  |
| H  | -1.155166 | 6.468151  | -3.018230 |
| H  | -2.449708 | 8.261600  | -1.832229 |
| C  | -2.341498 | 2.825358  | 1.808540  |
| C  | -2.544782 | 1.617066  | 2.515350  |
| C  | -1.764541 | 3.927169  | 2.475417  |
| C  | -2.178580 | 1.517906  | 3.866196  |
| H  | -2.984920 | 0.745141  | 2.006021  |
| C  | -1.400191 | 3.821614  | 3.830357  |
| H  | -1.585307 | 4.872483  | 1.941388  |
| C  | -1.602333 | 2.618823  | 4.527932  |
| H  | -2.346663 | 0.573837  | 4.408243  |
| H  | -0.951917 | 4.688550  | 4.340338  |
| H  | -1.314971 | 2.539207  | 5.587874  |
| Au | -1.078654 | 1.325284  | -0.904209 |
| H  | -0.078751 | -0.740532 | -2.355363 |
| H  | 0.262243  | -0.796743 | 0.750647  |
| H  | -1.824764 | -2.017054 | -2.212496 |
| P  | 4.308592  | 0.027378  | 0.074423  |
| C  | -0.211007 | -4.660780 | 0.969892  |
| C  | -0.773809 | -5.107007 | -0.277400 |
| C  | 0.645045  | -3.576477 | 0.992342  |
| C  | -0.199995 | -4.577995 | -1.489830 |
| C  | 1.042237  | -2.858616 | -0.199357 |
| H  | 0.976539  | -3.197038 | 1.973537  |
| C  | 0.667689  | -3.503205 | -1.435825 |
| H  | -0.495858 | -4.982281 | -2.466954 |
| H  | 1.009083  | -3.057489 | -2.385020 |
| C  | 5.328178  | 0.394212  | -1.401732 |
| C  | 6.520679  | 1.144406  | -1.311191 |
| C  | 4.868507  | -0.052261 | -2.661210 |
| C  | 7.242812  | 1.448468  | -2.477461 |
| H  | 6.889463  | 1.484699  | -0.330643 |
| C  | 5.591660  | 0.262635  | -3.823062 |
| H  | 3.944772  | -0.651596 | -2.725364 |
| C  | 6.779050  | 1.011785  | -3.731635 |
| H  | 8.175904  | 2.028639  | -2.404773 |
| H  | 5.232219  | -0.087307 | -4.803278 |
| H  | 7.350137  | 1.250395  | -4.642480 |
| C  | 5.417351  | 0.113583  | 1.526076  |
| C  | 5.676137  | 1.333230  | 2.189730  |
| C  | 6.048143  | -1.074924 | 1.955505  |
| C  | 6.571459  | 1.359941  | 3.272344  |
| H  | 5.172568  | 2.257289  | 1.863744  |

|    |           |           |           |
|----|-----------|-----------|-----------|
| C  | 6.945275  | -1.038578 | 3.035270  |
| H  | 5.828764  | -2.026573 | 1.443579  |
| C  | 7.206940  | 0.177405  | 3.693150  |
| H  | 6.772851  | 2.310138  | 3.791289  |
| H  | 7.437216  | -1.965240 | 3.369436  |
| H  | 7.906522  | 0.202574  | 4.543273  |
| C  | 3.137630  | 1.447052  | 0.240149  |
| C  | 3.021745  | 2.449560  | -0.743609 |
| C  | 2.245420  | 1.436546  | 1.339760  |
| C  | 2.019552  | 3.431054  | -0.626550 |
| H  | 3.706056  | 2.460872  | -1.606276 |
| C  | 1.251197  | 2.417779  | 1.452816  |
| H  | 2.326502  | 0.646139  | 2.104575  |
| C  | 1.135670  | 3.415959  | 0.464851  |
| H  | 1.925422  | 4.208873  | -1.400198 |
| H  | 0.548583  | 2.399752  | 2.299828  |
| H  | 0.345766  | 4.178310  | 0.542683  |
| Au | 2.841138  | -1.767584 | -0.084312 |
| H  | -0.510006 | -5.131426 | 1.915556  |
| N  | -1.840741 | -5.950259 | -0.307234 |
| C  | -2.452391 | -6.418667 | 0.937598  |
| H  | -3.385245 | -6.958710 | 0.702885  |
| H  | -1.775968 | -7.101521 | 1.495753  |
| H  | -2.716371 | -5.561637 | 1.591945  |
| C  | -2.433659 | -6.351662 | -1.582809 |
| H  | -1.728093 | -6.958379 | -2.190107 |
| H  | -3.337463 | -6.954529 | -1.390542 |
| H  | -2.737951 | -5.461344 | -2.172591 |
| C  | -5.234426 | -3.907385 | 0.364953  |
| F  | -5.115389 | -5.123973 | -0.253723 |
| F  | -5.566223 | -4.145890 | 1.653329  |
| F  | -6.289189 | -3.283890 | -0.226872 |

**[(PPh<sub>3</sub>)Au(alkene)]<sup>+</sup> (aniline)<sup>+</sup> TS Markovnikov (where alkene = H<sub>2</sub>C=CH(Ph(*p*Cl)))**

-3477.56799923 A.U.

|   |           |           |           |
|---|-----------|-----------|-----------|
| P | 3.355408  | -2.045163 | -0.015755 |
| H | -1.017775 | -0.106877 | -1.230693 |
| C | -0.075611 | 0.476826  | -1.223500 |
| C | -0.002516 | 1.445629  | -0.093882 |
| C | 1.885055  | 2.817572  | -1.109684 |
| C | 1.209927  | 2.311465  | 0.025933  |
| C | 2.984264  | 3.678608  | -0.982107 |
| C | 1.693197  | 2.681302  | 1.300863  |
| C | 3.416458  | 4.051606  | 0.302425  |
| H | 3.507967  | 4.063094  | -1.869522 |
| C | 2.791694  | 3.538344  | 1.452559  |
| H | 1.189047  | 2.291189  | 2.199366  |
| H | 3.165269  | 3.812813  | 2.449543  |
| C | 4.644812  | -0.948772 | 0.698074  |
| C | 5.592721  | -1.445961 | 1.622616  |
| C | 4.675366  | 0.415198  | 0.327542  |
| C | 6.572158  | -0.589468 | 2.151042  |
| H | 5.552719  | -2.499402 | 1.943318  |
| C | 5.656345  | 1.267226  | 0.863135  |
| H | 3.917615  | 0.817393  | -0.365517 |
| C | 6.606298  | 0.764948  | 1.769826  |
| H | 7.309460  | -0.980414 | 2.869646  |
| H | 5.669403  | 2.330889  | 0.579519  |
| H | 7.372941  | 1.434540  | 2.190472  |
| C | 4.145367  | -3.128472 | -1.268858 |
| C | 5.520966  | -3.442361 | -1.251651 |
| C | 3.308651  | -3.686204 | -2.262781 |
| C | 6.049922  | -4.315620 | -2.217092 |
| H | 6.183958  | -2.996963 | -0.493936 |
| C | 3.842052  | -4.567573 | -3.217538 |
| H | 2.239196  | -3.416967 | -2.288028 |
| C | 5.212799  | -4.882319 | -3.195326 |
| H | 7.125107  | -4.553268 | -2.205818 |
| H | 3.187092  | -5.000849 | -3.989530 |
| H | 5.632865  | -5.565843 | -3.949712 |
| C | 2.874083  | -3.162154 | 1.365861  |
| C | 2.519330  | -2.575950 | 2.603224  |
| C | 2.723285  | -4.552127 | 1.182792  |
| C | 2.020739  | -3.375371 | 3.643508  |

|    |           |           |           |
|----|-----------|-----------|-----------|
| H  | 2.633820  | -1.489436 | 2.748694  |
| C  | 2.211494  | -5.345810 | 2.225630  |
| H  | 3.005829  | -5.017885 | 0.225327  |
| C  | 1.858500  | -4.761373 | 3.454163  |
| H  | 1.753435  | -2.914198 | 4.607248  |
| H  | 2.095238  | -6.430675 | 2.076477  |
| H  | 1.461432  | -5.386746 | 4.268800  |
| Au | 1.515876  | -0.832145 | -0.764846 |
| H  | 0.075476  | 0.929106  | -2.224629 |
| H  | -0.272749 | 0.997020  | 0.878540  |
| H  | 1.546345  | 2.531520  | -2.115464 |
| P  | -4.137151 | -0.709001 | 0.096715  |
| C  | -0.664421 | 4.834461  | 0.989238  |
| C  | -0.183800 | 5.350414  | -0.265606 |
| C  | -1.280450 | 3.598620  | 1.036252  |
| C  | -0.622962 | 4.686318  | -1.466838 |
| C  | -1.489700 | 2.776503  | -0.136655 |
| H  | -1.547406 | 3.187643  | 2.024374  |
| C  | -1.247697 | 3.456017  | -1.388146 |
| H  | -0.399867 | 5.114434  | -2.453078 |
| H  | -1.472379 | 2.922828  | -2.326898 |
| C  | -5.318113 | -1.090743 | -1.251911 |
| C  | -6.199176 | -2.190947 | -1.161676 |
| C  | -5.306991 | -0.289564 | -2.414445 |
| C  | -7.057724 | -2.486432 | -2.232490 |
| H  | -6.221202 | -2.812021 | -0.252297 |
| C  | -6.166472 | -0.593516 | -3.484016 |
| H  | -4.626581 | 0.576216  | -2.474389 |
| C  | -7.041153 | -1.690597 | -3.393371 |
| H  | -7.747575 | -3.341574 | -2.158849 |
| H  | -6.157989 | 0.034718  | -4.388273 |
| H  | -7.719200 | -1.924171 | -4.229106 |
| C  | -4.986652 | -1.088708 | 1.673852  |
| C  | -5.000906 | -2.391311 | 2.220580  |
| C  | -5.671783 | -0.040982 | 2.328199  |
| C  | -5.705563 | -2.640665 | 3.410360  |
| H  | -4.451084 | -3.206032 | 1.723014  |
| C  | -6.377586 | -0.299323 | 3.514579  |
| H  | -5.644618 | 0.977445  | 1.906420  |
| C  | -6.395058 | -1.597911 | 4.055524  |
| H  | -5.714941 | -3.656005 | 3.836689  |
| H  | -6.911681 | 0.518711  | 4.022536  |
| H  | -6.945173 | -1.797483 | 4.988427  |
| C  | -2.779894 | -1.950173 | -0.062142 |
| C  | -2.570968 | -2.659343 | -1.262916 |
| C  | -1.848233 | -2.075021 | 0.996495  |
| C  | -1.442864 | -3.489788 | -1.399227 |
| H  | -3.287427 | -2.563378 | -2.093935 |
| C  | -0.732821 | -2.914359 | 0.858722  |
| H  | -1.997378 | -1.510351 | 1.931433  |
| C  | -0.527004 | -3.620732 | -0.342436 |
| H  | -1.285032 | -4.039908 | -2.340037 |
| H  | -0.009925 | -3.014208 | 1.682226  |
| H  | 0.354710  | -4.271769 | -0.443679 |
| Au | -3.009016 | 1.319146  | -0.021430 |
| H  | -0.485682 | 5.386289  | 1.921548  |
| N  | 0.697125  | 6.386319  | -0.310983 |
| C  | 1.240408  | 6.955421  | 0.923997  |
| H  | 2.080426  | 7.627463  | 0.675353  |
| H  | 0.475904  | 7.539080  | 1.481415  |
| H  | 1.634212  | 6.154118  | 1.583437  |
| C  | 1.204207  | 6.870350  | -1.594822 |
| H  | 0.383976  | 7.245349  | -2.242771 |
| H  | 1.907161  | 7.703348  | -1.418762 |
| H  | 1.747082  | 6.064926  | -2.136120 |
| Cl | 4.760497  | 5.167549  | 0.473427  |

[(PPh<sub>3</sub>)Au(alkene)]<sup>+</sup> (aniline)<sup>+</sup> TS Markovnikov (where alkene = H<sub>2</sub>C=C(Ph)<sub>2</sub>)  
-3248.96651583 A.U.

|   |           |           |           |
|---|-----------|-----------|-----------|
| P | -4.018398 | -0.587750 | -0.231843 |
| H | 0.459809  | 0.954211  | -2.071817 |
| C | 0.095401  | 0.717107  | -1.053438 |
| C | 0.286825  | 1.817201  | -0.063928 |
| C | 0.531645  | 0.391039  | 2.062917  |



---

|    |           |           |           |
|----|-----------|-----------|-----------|
| C  | -0.119443 | 1.418616  | 1.347861  |
| C  | 0.056793  | -0.062991 | 3.302256  |
| C  | -1.307546 | 1.949799  | 1.911769  |
| C  | -1.111622 | 0.491854  | 3.856412  |
| H  | 0.603326  | -0.861496 | 3.829555  |
| C  | -1.800026 | 1.489921  | 3.143689  |
| H  | -1.886381 | 2.700104  | 1.355188  |
| H  | -1.494782 | 0.134621  | 4.825032  |
| H  | -2.745485 | 1.903097  | 3.529660  |
| C  | -3.787504 | -2.049574 | 0.858045  |
| C  | -4.382466 | -3.301301 | 0.604304  |
| C  | -2.894518 | -1.899280 | 1.944214  |
| C  | -4.084864 | -4.396089 | 1.438683  |
| H  | -5.075377 | -3.425050 | -0.242863 |
| C  | -2.614875 | -2.989263 | 2.779935  |
| H  | -2.412604 | -0.927401 | 2.130976  |
| C  | -3.206408 | -4.242625 | 2.526188  |
| H  | -4.547725 | -5.374805 | 1.237321  |
| H  | -1.920210 | -2.858738 | 3.624620  |
| H  | -2.980169 | -5.102618 | 3.175766  |
| C  | -5.310398 | -1.065251 | -1.436129 |
| C  | -6.680517 | -1.062174 | -1.095152 |
| C  | -4.900708 | -1.492852 | -2.718110 |
| C  | -7.632538 | -1.492596 | -2.033838 |
| H  | -7.000787 | -0.717626 | -0.098750 |
| C  | -5.857967 | -1.928324 | -3.649961 |
| H  | -3.829571 | -1.472426 | -2.980145 |
| C  | -7.222330 | -1.928055 | -3.307943 |
| H  | -8.701835 | -1.485915 | -1.770695 |
| H  | -5.538805 | -2.260071 | -4.650319 |
| H  | -7.972647 | -2.262494 | -4.041438 |
| C  | -4.731460 | 0.699603  | 0.873091  |
| C  | -5.398452 | 0.371163  | 2.073162  |
| C  | -4.541487 | 2.056567  | 0.526245  |
| C  | -5.864492 | 1.392505  | 2.919104  |
| H  | -5.536063 | -0.683480 | 2.359030  |
| C  | -5.011461 | 3.072202  | 1.373782  |
| H  | -3.999291 | 2.315535  | -0.398138 |
| C  | -5.668333 | 2.741697  | 2.573834  |
| H  | -6.380152 | 1.131219  | 3.856489  |
| H  | -4.853020 | 4.127199  | 1.100773  |
| H  | -6.028424 | 3.539114  | 3.242709  |
| Au | -1.924223 | 0.111271  | -0.956602 |
| H  | 0.586407  | -0.214254 | -0.713555 |
| H  | 1.439445  | -0.060407 | 1.625568  |
| P  | 3.226661  | -2.169544 | -0.129402 |
| C  | 3.008051  | 4.205071  | -1.248063 |
| C  | 3.202152  | 4.928288  | -0.020519 |
| C  | 2.620226  | 2.879182  | -1.221741 |
| C  | 3.089722  | 4.195286  | 1.212108  |
| C  | 2.401638  | 2.143703  | -0.001233 |
| H  | 2.408178  | 2.379753  | -2.181924 |
| C  | 2.696213  | 2.867043  | 1.207167  |
| H  | 3.271374  | 4.693974  | 2.173405  |
| H  | 2.559974  | 2.356532  | 2.174895  |
| C  | 3.382134  | -2.959987 | 1.521997  |
| C  | 3.493635  | -4.363601 | 1.636918  |
| C  | 3.335188  | -2.163310 | 2.686771  |
| C  | 3.546865  | -4.960594 | 2.906340  |
| H  | 3.542155  | -4.991795 | 0.733627  |
| C  | 3.386039  | -2.766975 | 3.955422  |
| H  | 3.268421  | -1.066709 | 2.599515  |
| C  | 3.489735  | -4.164485 | 4.065938  |
| H  | 3.636763  | -6.054777 | 2.991586  |
| H  | 3.353954  | -2.139745 | 4.860062  |
| H  | 3.534743  | -4.636916 | 5.059723  |
| C  | 4.456605  | -2.969375 | -1.223120 |
| C  | 4.187560  | -4.183985 | -1.892926 |
| C  | 5.720785  | -2.353899 | -1.356489 |
| C  | 5.186323  | -4.781631 | -2.679642 |
| H  | 3.194164  | -4.653591 | -1.812497 |
| C  | 6.715269  | -2.960254 | -2.141064 |
| H  | 5.917509  | -1.395203 | -0.848429 |
| C  | 6.449341  | -4.173903 | -2.800966 |

|    |           |           |           |
|----|-----------|-----------|-----------|
| H  | 4.975304  | -5.726709 | -3.204060 |
| H  | 7.700186  | -2.478845 | -2.243827 |
| H  | 7.228407  | -4.645174 | -3.420362 |
| C  | 1.566518  | -2.679828 | -0.748143 |
| C  | 0.556944  | -3.116125 | 0.135825  |
| C  | 1.257641  | -2.463340 | -2.112297 |
| C  | -0.742928 | -3.351212 | -0.344942 |
| H  | 0.778744  | -3.269627 | 1.203212  |
| C  | -0.044540 | -2.689952 | -2.582526 |
| H  | 2.037209  | -2.103501 | -2.803297 |
| C  | -1.047444 | -3.132267 | -1.698697 |
| H  | -1.524266 | -3.697870 | 0.345256  |
| H  | -0.280143 | -2.511088 | -3.643009 |
| H  | -2.072765 | -3.302529 | -2.061878 |
| Au | 3.091240  | 0.150683  | -0.065746 |
| H  | 3.119241  | 4.709557  | -2.216207 |
| N  | 3.450037  | 6.270066  | -0.026809 |
| C  | 3.424423  | 7.019167  | -1.284161 |
| H  | 3.589774  | 8.090684  | -1.073355 |
| H  | 4.223950  | 6.681442  | -1.977976 |
| H  | 2.442644  | 6.911573  | -1.794083 |
| C  | 3.609025  | 7.002030  | 1.228395  |
| H  | 4.434033  | 6.581545  | 1.841258  |
| H  | 3.856515  | 8.055792  | 1.008247  |
| H  | 2.676794  | 6.983726  | 1.836063  |
| C  | -0.107290 | 3.208702  | -0.485441 |
| C  | -0.006860 | 4.301326  | 0.411600  |
| C  | -0.538748 | 3.481800  | -1.806712 |
| C  | -0.283867 | 5.613593  | -0.002751 |
| C  | -0.820424 | 4.792025  | -2.221462 |
| C  | -0.682818 | 5.868734  | -1.326051 |
| H  | 0.302857  | 4.119208  | 1.449540  |
| H  | -0.668830 | 2.653643  | -2.517282 |
| H  | -0.189702 | 6.441859  | 0.717648  |
| H  | -1.158316 | 4.973324  | -3.254113 |
| H  | -0.903286 | 6.896930  | -1.654031 |

[(PPh<sub>3</sub>)Au(alkene)--(aniline)]<sup>+</sup> TS Markovnikov (where alkene = H<sub>2</sub>C=CH(Ph(*p*Me)))  
-3057.35146849 A.U.

|   |           |           |           |
|---|-----------|-----------|-----------|
| P | 3.458771  | -1.801824 | -0.020087 |
| H | -0.949600 | -0.043419 | -1.494890 |
| C | -0.019902 | 0.552394  | -1.395618 |
| C | -0.025679 | 1.438353  | -0.199462 |
| C | 1.821201  | 3.001494  | -0.999453 |
| C | 1.146695  | 2.332438  | 0.045824  |
| C | 2.901760  | 3.858044  | -0.731564 |
| C | 1.606141  | 2.547986  | 1.366578  |
| C | 3.354709  | 4.077915  | 0.586087  |
| H | 3.413759  | 4.358901  | -1.569673 |
| C | 2.691057  | 3.393094  | 1.631260  |
| H | 1.098443  | 2.033085  | 2.198453  |
| H | 3.033722  | 3.529346  | 2.670257  |
| C | 4.950846  | -0.728666 | -0.192859 |
| C | 6.261257  | -1.245484 | -0.283431 |
| C | 4.750709  | 0.672187  | -0.230235 |
| C | 7.356961  | -0.371635 | -0.387393 |
| H | 6.435221  | -2.331460 | -0.291880 |
| C | 5.851776  | 1.538312  | -0.323418 |
| H | 3.732328  | 1.093972  | -0.206206 |
| C | 7.156245  | 1.019964  | -0.399844 |
| H | 8.375068  | -0.784313 | -0.463895 |
| H | 5.678269  | 2.624632  | -0.352768 |
| H | 8.018310  | 1.700256  | -0.482972 |
| C | 3.892780  | -3.486741 | -0.584627 |
| C | 4.822843  | -4.305946 | 0.099378  |
| C | 3.262229  | -3.972481 | -1.752059 |
| C | 5.118582  | -5.589647 | -0.387116 |
| H | 5.307320  | -3.946932 | 1.021286  |
| C | 3.564527  | -5.257138 | -2.234942 |
| H | 2.531587  | -3.335217 | -2.277358 |
| C | 4.491994  | -6.065104 | -1.554178 |
| H | 5.841875  | -6.223732 | 0.149027  |
| H | 3.071843  | -5.628555 | -3.146947 |
| H | 4.726849  | -7.072469 | -1.932075 |

---

|    |           |           |           |
|----|-----------|-----------|-----------|
| C  | 3.144090  | -1.914503 | 1.798332  |
| C  | 2.999885  | -0.697746 | 2.505244  |
| C  | 2.871991  | -3.132912 | 2.456068  |
| C  | 2.595739  | -0.704107 | 3.848527  |
| H  | 3.188390  | 0.262252  | 1.999107  |
| C  | 2.468473  | -3.132474 | 3.804143  |
| H  | 2.958155  | -4.089933 | 1.919883  |
| C  | 2.326592  | -1.921485 | 4.502661  |
| H  | 2.488820  | 0.249894  | 4.388774  |
| H  | 2.259028  | -4.089239 | 4.307542  |
| H  | 2.007613  | -1.925364 | 5.556559  |
| Au | 1.583396  | -0.742138 | -0.917889 |
| H  | 0.186319  | 1.073067  | -2.352483 |
| H  | -0.331098 | 0.912612  | 0.722559  |
| H  | 1.502458  | 2.842465  | -2.039279 |
| P  | -3.983998 | -0.884404 | 0.063288  |
| C  | -0.831152 | 4.804253  | 0.946454  |
| C  | -0.424235 | 5.393063  | -0.299944 |
| C  | -1.372251 | 3.532690  | 0.967914  |
| C  | -0.810956 | 4.719859  | -1.512528 |
| C  | -1.565558 | 2.738394  | -0.223458 |
| H  | -1.587471 | 3.076122  | 1.948510  |
| C  | -1.356157 | 3.450105  | -1.459351 |
| H  | -0.615238 | 5.178945  | -2.490596 |
| H  | -1.548539 | 2.922487  | -2.408390 |
| C  | -4.909641 | -1.514104 | -1.386850 |
| C  | -5.869040 | -2.542803 | -1.270039 |
| C  | -4.603999 | -0.974232 | -2.656495 |
| C  | -6.513179 | -3.028396 | -2.420473 |
| H  | -6.119033 | -2.959544 | -0.281728 |
| C  | -5.245967 | -1.470568 | -3.802653 |
| H  | -3.863228 | -0.161446 | -2.740524 |
| C  | -6.201233 | -2.496668 | -3.684920 |
| H  | -7.266276 | -3.826388 | -2.327467 |
| H  | -5.006389 | -1.047672 | -4.790688 |
| H  | -6.710831 | -2.879309 | -4.583042 |
| C  | -4.994048 | -1.232658 | 1.547410  |
| C  | -4.961270 | -2.493990 | 2.182917  |
| C  | -5.844602 | -0.216045 | 2.034298  |
| C  | -5.786645 | -2.735516 | 3.293785  |
| H  | -4.285152 | -3.280991 | 1.812072  |
| C  | -6.669317 | -0.466702 | 3.143237  |
| H  | -5.851323 | 0.771609  | 1.544169  |
| C  | -6.641449 | -1.725155 | 3.771666  |
| H  | -5.760958 | -3.718098 | 3.790393  |
| H  | -7.332352 | 0.326356  | 3.522500  |
| H  | -7.285570 | -1.918024 | 4.643848  |
| C  | -2.488291 | -1.959134 | 0.205717  |
| C  | -2.112124 | -2.864666 | -0.806492 |
| C  | -1.635037 | -1.754526 | 1.316915  |
| C  | -0.889510 | -3.555165 | -0.707439 |
| H  | -2.767311 | -3.027078 | -1.676520 |
| C  | -0.421088 | -2.448346 | 1.412779  |
| H  | -1.922742 | -1.040608 | 2.106564  |
| C  | -0.043879 | -3.346290 | 0.394444  |
| H  | -0.593386 | -4.255785 | -1.503514 |
| H  | 0.245275  | -2.280106 | 2.272282  |
| H  | 0.916822  | -3.879326 | 0.459993  |
| Au | -3.021400 | 1.220822  | -0.116816 |
| H  | -0.658051 | 5.330489  | 1.894131  |
| N  | 0.343804  | 6.518912  | -0.328513 |
| C  | 0.870712  | 7.080151  | 0.916124  |
| H  | 1.547717  | 7.920017  | 0.679062  |
| H  | 0.059023  | 7.470587  | 1.566704  |
| H  | 1.446077  | 6.315907  | 1.483222  |
| C  | 0.810533  | 7.061362  | -1.603073 |
| H  | -0.038328 | 7.330404  | -2.266065 |
| H  | 1.396153  | 7.979300  | -1.417689 |
| H  | 1.459769  | 6.332118  | -2.137249 |
| C  | 4.510031  | 5.004408  | 0.885788  |
| H  | 4.980143  | 5.393102  | -0.039431 |
| H  | 4.180056  | 5.878670  | 1.488411  |
| H  | 5.295685  | 4.490769  | 1.479464  |

---

[(PPh<sub>3</sub>)Au(alkene)--(aniline)]<sup>+</sup> TS Markovnikov (where alkene = H<sub>2</sub>C=CH(Ph(pNO<sub>2</sub>)))

-3222.44151482 A.U.

|    |           |           |           |
|----|-----------|-----------|-----------|
| P  | 3.078388  | -2.364664 | -0.009749 |
| H  | -1.156596 | -0.177769 | -1.391263 |
| C  | -0.162099 | 0.309850  | -1.382494 |
| C  | 0.018182  | 1.225151  | -0.226169 |
| C  | 2.037107  | 2.432647  | -1.193191 |
| C  | 1.312792  | 1.952518  | -0.073913 |
| C  | 3.214644  | 3.170373  | -1.029387 |
| C  | 1.812535  | 2.230715  | 1.221399  |
| C  | 3.644425  | 3.470849  | 0.272487  |
| H  | 3.800845  | 3.528277  | -1.887416 |
| C  | 2.963529  | 3.002163  | 1.407544  |
| H  | 1.268733  | 1.844875  | 2.097527  |
| H  | 3.345615  | 3.249892  | 2.407660  |
| C  | 4.687430  | -1.498259 | -0.259870 |
| C  | 5.924470  | -2.175686 | -0.313097 |
| C  | 4.660680  | -0.088619 | -0.386312 |
| C  | 7.116341  | -1.447059 | -0.468951 |
| H  | 5.966252  | -3.273256 | -0.251802 |
| C  | 5.855601  | 0.635062  | -0.530722 |
| H  | 3.697441  | 0.445997  | -0.388926 |
| C  | 7.086081  | -0.044650 | -0.569560 |
| H  | 8.076985  | -1.983394 | -0.516073 |
| H  | 5.823752  | 1.732225  | -0.628052 |
| H  | 8.023397  | 0.520209  | -0.691531 |
| C  | 3.279680  | -4.122186 | -0.473074 |
| C  | 4.101695  | -5.010989 | 0.260356  |
| C  | 2.575611  | -4.593653 | -1.603616 |
| C  | 4.221316  | -6.350420 | -0.143742 |
| H  | 4.636285  | -4.660331 | 1.157424  |
| C  | 2.700738  | -5.935113 | -2.003107 |
| H  | 1.926950  | -3.901598 | -2.165799 |
| C  | 3.523581  | -6.812512 | -1.275361 |
| H  | 4.861719  | -7.038787 | 0.429514  |
| H  | 2.151692  | -6.296484 | -2.886491 |
| H  | 3.619967  | -7.863955 | -1.588199 |
| C  | 2.779364  | -2.331406 | 1.814322  |
| C  | 2.876804  | -1.085309 | 2.475677  |
| C  | 2.297972  | -3.454344 | 2.520667  |
| C  | 2.499870  | -0.969172 | 3.822362  |
| H  | 3.242789  | -0.198962 | 1.933922  |
| C  | 1.924029  | -3.331910 | 3.871528  |
| H  | 2.205360  | -4.430528 | 2.021080  |
| C  | 2.019959  | -2.091138 | 4.524384  |
| H  | 2.586118  | 0.004626  | 4.330085  |
| H  | 1.553349  | -4.215582 | 4.414092  |
| H  | 1.726173  | -1.998517 | 5.581522  |
| Au | 1.311510  | -1.141964 | -0.921244 |
| H  | 0.032687  | 0.766444  | -2.373455 |
| H  | -0.313973 | 0.785793  | 0.730669  |
| H  | 1.676181  | 2.214640  | -2.207575 |
| P  | -4.225612 | -0.423909 | 0.064535  |
| C  | -0.219400 | 4.695026  | 0.971080  |
| C  | 0.273976  | 5.225588  | -0.271919 |
| C  | -0.953685 | 3.524148  | 0.982437  |
| C  | -0.221638 | 4.631526  | -1.489421 |
| C  | -1.275562 | 2.780648  | -0.215283 |
| H  | -1.234861 | 3.098251  | 1.960205  |
| C  | -0.960002 | 3.463439  | -1.446292 |
| H  | 0.030751  | 5.070801  | -2.463585 |
| H  | -1.238890 | 2.984387  | -2.399700 |
| C  | -5.206078 | -0.918406 | -1.400766 |
| C  | -6.301333 | -1.802653 | -1.294971 |
| C  | -4.811708 | -0.429499 | -2.666521 |
| C  | -6.991364 | -2.197923 | -2.453255 |
| H  | -6.620712 | -2.175898 | -0.309168 |
| C  | -5.501789 | -0.835460 | -3.820370 |
| H  | -3.965273 | 0.273706  | -2.741680 |
| C  | -6.591267 | -1.719129 | -3.714053 |
| H  | -7.849838 | -2.882379 | -2.369338 |
| H  | -5.193890 | -0.452368 | -4.805691 |
| H  | -7.137102 | -2.030128 | -4.618508 |
| C  | -5.302739 | -0.608872 | 1.529892  |

---

|    |           |           |           |
|----|-----------|-----------|-----------|
| C  | -5.431821 | -1.843574 | 2.203940  |
| C  | -6.040387 | 0.515455  | 1.961989  |
| C  | -6.305321 | -1.949788 | 3.299392  |
| H  | -4.843714 | -2.716136 | 1.877381  |
| C  | -6.914307 | 0.399465  | 3.055083  |
| H  | -5.921347 | 1.480672  | 1.442412  |
| C  | -7.047330 | -0.831905 | 3.722739  |
| H  | -6.405983 | -2.911384 | 3.826552  |
| H  | -7.489108 | 1.276171  | 3.391717  |
| H  | -7.729145 | -0.919462 | 4.583086  |
| C  | -2.899573 | -1.700449 | 0.235940  |
| C  | -2.649970 | -2.662146 | -0.763271 |
| C  | -2.029151 | -1.602659 | 1.348648  |
| C  | -1.535952 | -3.514841 | -0.650938 |
| H  | -3.317862 | -2.740365 | -1.635124 |
| C  | -0.925016 | -2.459273 | 1.459574  |
| H  | -2.217291 | -0.843579 | 2.126162  |
| C  | -0.672811 | -3.413212 | 0.453029  |
| H  | -1.336620 | -4.257703 | -1.438686 |
| H  | -0.242976 | -2.374237 | 2.319623  |
| H  | 0.204206  | -4.074291 | 0.527571  |
| Au | -2.958742 | 1.515513  | -0.112182 |
| H  | 0.046445  | 5.173213  | 1.922822  |
| N  | 1.214355  | 6.209635  | -0.299169 |
| C  | 1.795087  | 6.731508  | 0.942032  |
| H  | 2.429290  | 7.604159  | 0.705653  |
| H  | 1.006424  | 7.070690  | 1.643602  |
| H  | 2.431851  | 5.970819  | 1.446709  |
| C  | 1.799002  | 6.631857  | -1.572822 |
| H  | 1.041109  | 7.102407  | -2.234537 |
| H  | 2.594463  | 7.373237  | -1.381459 |
| H  | 2.250703  | 5.768875  | -2.109195 |
| N  | 4.835851  | 4.321155  | 0.453972  |
| O  | 4.901188  | 4.985352  | 1.495395  |
| O  | 5.677907  | 4.327740  | -0.450749 |

**[(PPh<sub>3</sub>)Au(alkene)--(aniline)]<sup>+</sup> TS Markovnikov (where alkene = (Me)HC=CH(Ph(pOMe)))**  
-3171.79359997 A.U.

|   |           |           |           |
|---|-----------|-----------|-----------|
| P | 3.226633  | -2.108132 | -0.000182 |
| H | -1.164238 | -0.273656 | -0.917059 |
| C | -0.277248 | 0.303937  | -1.246911 |
| C | 0.008042  | 1.351247  | -0.207920 |
| C | 1.823693  | 2.770664  | -1.353766 |
| C | 1.298216  | 2.115419  | -0.211947 |
| C | 3.046390  | 3.447132  | -1.308269 |
| C | 2.043700  | 2.208235  | 0.984010  |
| C | 3.791130  | 3.500865  | -0.107969 |
| H | 3.463666  | 3.933541  | -2.202838 |
| C | 3.276415  | 2.877515  | 1.050718  |
| H | 1.662677  | 1.707784  | 1.888749  |
| H | 3.832103  | 2.889322  | 1.998506  |
| C | 4.786315  | -1.244441 | -0.464706 |
| C | 6.040839  | -1.891522 | -0.469177 |
| C | 4.708180  | 0.134257  | -0.770794 |
| C | 7.204400  | -1.161319 | -0.763979 |
| H | 6.114292  | -2.968473 | -0.253990 |
| C | 5.877685  | 0.861990  | -1.049595 |
| H | 3.730274  | 0.642258  | -0.792235 |
| C | 7.126232  | 0.215115  | -1.045893 |
| H | 8.179625  | -1.672783 | -0.773648 |
| H | 5.804292  | 1.937462  | -1.274869 |
| H | 8.042467  | 0.781984  | -1.274636 |
| C | 3.427300  | -3.894315 | -0.348745 |
| C | 4.248260  | -4.735207 | 0.438611  |
| C | 2.722870  | -4.434877 | -1.448095 |
| C | 4.367478  | -6.097664 | 0.119222  |
| H | 4.781279  | -4.328482 | 1.312790  |
| C | 2.848539  | -5.798344 | -1.763570 |
| H | 2.070432  | -3.779897 | -2.049292 |
| C | 3.670595  | -6.629261 | -0.981828 |
| H | 5.006387  | -6.749385 | 0.735489  |
| H | 2.298562  | -6.214458 | -2.622007 |
| H | 3.765539  | -7.698502 | -1.227727 |
| C | 3.138640  | -1.953223 | 1.837279  |

---

|    |           |           |           |
|----|-----------|-----------|-----------|
| C  | 3.531002  | -0.739274 | 2.444272  |
| C  | 2.533533  | -2.958080 | 2.624403  |
| C  | 3.321943  | -0.538332 | 3.818399  |
| H  | 3.993576  | 0.055756  | 1.838935  |
| C  | 2.329619  | -2.751677 | 3.999788  |
| H  | 2.223155  | -3.909861 | 2.165984  |
| C  | 2.719842  | -1.541208 | 4.599995  |
| H  | 3.637260  | 0.408970  | 4.284050  |
| H  | 1.864915  | -3.545345 | 4.605776  |
| H  | 2.560929  | -1.382626 | 5.678025  |
| Au | 1.343986  | -1.007030 | -0.820911 |
| H  | -0.159043 | 0.916152  | 0.795200  |
| H  | 1.265950  | 2.747707  | -2.298266 |
| P  | -4.191042 | -0.588451 | 0.121438  |
| C  | -0.302381 | 4.561300  | 1.299613  |
| C  | 0.045144  | 5.270971  | 0.097621  |
| C  | -0.977553 | 3.359667  | 1.219373  |
| C  | -0.566584 | 4.832389  | -1.127778 |
| C  | -1.366775 | 2.746646  | -0.035926 |
| H  | -1.133263 | 2.789167  | 2.150662  |
| C  | -1.246018 | 3.628445  | -1.177930 |
| H  | -0.458870 | 5.425564  | -2.045609 |
| H  | -1.650631 | 3.303460  | -2.148301 |
| C  | -5.060695 | -1.029934 | -1.430080 |
| C  | -6.226288 | -1.824511 | -1.440380 |
| C  | -4.507135 | -0.570060 | -2.647569 |
| C  | -6.830737 | -2.158404 | -2.664906 |
| H  | -6.666304 | -2.176849 | -0.494185 |
| C  | -5.110738 | -0.917084 | -3.866355 |
| H  | -3.601936 | 0.060371  | -2.634390 |
| C  | -6.274065 | -1.709231 | -3.875625 |
| H  | -7.744392 | -2.773043 | -2.671506 |
| H  | -4.677138 | -0.559011 | -4.813115 |
| H  | -6.752502 | -1.972421 | -4.831945 |
| C  | -5.347859 | -0.888666 | 1.502854  |
| C  | -5.514320 | -2.176438 | 2.059337  |
| C  | -6.106391 | 0.198214  | 1.990238  |
| C  | -6.445687 | -2.372236 | 3.092673  |
| H  | -4.911586 | -3.020630 | 1.687622  |
| C  | -7.038679 | -0.007014 | 3.020475  |
| H  | -5.956145 | 1.203674  | 1.563305  |
| C  | -7.208507 | -1.290624 | 3.570730  |
| H  | -6.575832 | -3.375156 | 3.528527  |
| H  | -7.630010 | 0.840519  | 3.400437  |
| H  | -7.936001 | -1.448564 | 4.382291  |
| C  | -2.835950 | -1.835139 | 0.299447  |
| C  | -2.537077 | -2.772151 | -0.710355 |
| C  | -1.980251 | -1.718973 | 1.421642  |
| C  | -1.385926 | -3.574569 | -0.603429 |
| H  | -3.190609 | -2.863952 | -1.591541 |
| C  | -0.838097 | -2.525236 | 1.525587  |
| H  | -2.201092 | -0.974398 | 2.204359  |
| C  | -0.533142 | -3.448343 | 0.505739  |
| H  | -1.146978 | -4.293707 | -1.402082 |
| H  | -0.161933 | -2.414525 | 2.387266  |
| H  | 0.378668  | -4.062266 | 0.568471  |
| Au | -2.995142 | 1.406484  | 0.053440  |
| H  | 0.024213  | 4.931091  | 2.280387  |
| N  | 0.945728  | 6.292350  | 0.114722  |
| C  | 1.633232  | 6.646847  | 1.356593  |
| H  | 2.360200  | 7.452840  | 1.152822  |
| H  | 0.923234  | 7.015629  | 2.127325  |
| H  | 2.185014  | 5.773111  | 1.768884  |
| C  | 1.365796  | 6.923964  | -1.136012 |
| H  | 0.519267  | 7.436904  | -1.640383 |
| H  | 2.140848  | 7.680615  | -0.920757 |
| H  | 1.795706  | 6.173232  | -1.834664 |
| O  | 4.991953  | 4.143997  | -0.178756 |
| C  | 5.839252  | 4.130095  | 0.966086  |
| H  | 5.370034  | 4.643012  | 1.836517  |
| H  | 6.111420  | 3.090210  | 1.258709  |
| H  | 6.756749  | 4.677564  | 0.680043  |
| C  | -0.459055 | 0.666223  | -2.717083 |
| H  | 0.438150  | 1.114976  | -3.187421 |

---

|   |           |           |           |
|---|-----------|-----------|-----------|
| H | -0.706952 | -0.243708 | -3.300473 |
| H | -1.306450 | 1.379566  | -2.848482 |

[(PPh<sub>3</sub>)Au(alkene)]<sup>+</sup> TS Markovnikov (where alkene = H<sub>2</sub>C=C(Ph)(tBu))

-3175.19931253 A.U.

|    |           |           |           |
|----|-----------|-----------|-----------|
| P  | -4.248861 | -0.359577 | 0.198911  |
| H  | 0.476816  | -0.025144 | 0.414887  |
| C  | -0.015733 | 0.964344  | 0.432896  |
| C  | 0.509111  | 1.855117  | -0.651032 |
| C  | -0.756220 | 3.747933  | 0.506817  |
| C  | 0.149794  | 3.324877  | -0.499382 |
| C  | -1.092404 | 5.100434  | 0.678010  |
| C  | 0.695227  | 4.339085  | -1.325768 |
| C  | -0.532026 | 6.086024  | -0.151007 |
| H  | -1.806585 | 5.381867  | 1.468376  |
| C  | 0.364097  | 5.691929  | -1.158882 |
| H  | 1.413851  | 4.075157  | -2.109695 |
| H  | -0.794650 | 7.147282  | -0.017747 |
| H  | 0.814130  | 6.444093  | -1.826342 |
| C  | -5.560585 | 0.870061  | 0.551144  |
| C  | -6.817042 | 0.485152  | 1.068469  |
| C  | -5.301834 | 2.228264  | 0.260254  |
| C  | -7.810402 | 1.455716  | 1.282179  |
| H  | -7.015768 | -0.571414 | 1.309684  |
| C  | -6.301598 | 3.191570  | 0.472275  |
| H  | -4.311866 | 2.527516  | -0.123105 |
| C  | -7.555096 | 2.806328  | 0.981936  |
| H  | -8.789083 | 1.155425  | 1.688066  |
| H  | -6.098064 | 4.249569  | 0.244764  |
| H  | -8.335934 | 3.563937  | 1.152801  |
| C  | -4.565747 | -1.770821 | 1.333383  |
| C  | -5.231241 | -2.942634 | 0.915204  |
| C  | -4.072399 | -1.674848 | 2.654283  |
| C  | -5.391744 | -4.013578 | 1.812961  |
| H  | -5.610956 | -3.024212 | -0.115444 |
| C  | -4.240766 | -2.744779 | 3.546745  |
| H  | -3.541883 | -0.761642 | 2.971580  |
| C  | -4.894856 | -3.918069 | 3.124799  |
| H  | -5.906615 | -4.929345 | 1.482781  |
| H  | -3.852692 | -2.667599 | 4.574491  |
| H  | -5.016876 | -4.761320 | 3.822387  |
| C  | -4.600982 | -1.020404 | -1.479471 |
| C  | -5.828766 | -0.805563 | -2.139021 |
| C  | -3.589619 | -1.785849 | -2.104541 |
| C  | -6.042273 | -1.359038 | -3.414455 |
| H  | -6.616234 | -0.203307 | -1.659536 |
| C  | -3.812517 | -2.341087 | -3.373424 |
| H  | -2.627171 | -1.944188 | -1.591207 |
| C  | -5.038888 | -2.126952 | -4.030937 |
| H  | -7.000268 | -1.186543 | -3.929444 |
| H  | -3.021668 | -2.936604 | -3.856142 |
| H  | -5.210946 | -2.556344 | -5.030360 |
| Au | -2.061421 | 0.422140  | 0.344960  |
| H  | 0.138228  | 1.389824  | 1.442735  |
| H  | -1.231266 | 3.003935  | 1.160860  |
| P  | 3.107998  | -2.303648 | 0.115971  |
| C  | 3.973599  | 4.056137  | -0.654391 |
| C  | 3.732312  | 4.640100  | 0.634184  |
| C  | 3.413287  | 2.835772  | -1.000429 |
| C  | 2.991336  | 3.852754  | 1.578834  |
| C  | 2.568686  | 2.068431  | -0.116571 |
| H  | 3.647045  | 2.446411  | -2.000062 |
| C  | 2.446568  | 2.638529  | 1.203889  |
| H  | 2.815638  | 4.220807  | 2.597991  |
| H  | 1.835599  | 2.106798  | 1.950123  |
| C  | 4.046416  | -2.994661 | 1.526344  |
| C  | 3.609979  | -4.146517 | 2.218148  |
| C  | 5.258650  | -2.367629 | 1.890442  |
| C  | 4.392355  | -4.670760 | 3.261090  |
| H  | 2.656291  | -4.626510 | 1.946582  |
| C  | 6.036941  | -2.900914 | 2.930397  |
| H  | 5.584632  | -1.457715 | 1.359706  |
| C  | 5.605226  | -4.051993 | 3.614646  |
| H  | 4.051306  | -5.567531 | 3.801636  |

|    |           |           |           |
|----|-----------|-----------|-----------|
| H  | 6.981838  | -2.411348 | 3.212993  |
| H  | 6.214532  | -4.465703 | 4.433389  |
| C  | 3.667770  | -3.196061 | -1.385542 |
| C  | 4.131879  | -4.527771 | -1.316581 |
| C  | 3.574623  | -2.545709 | -2.636374 |
| C  | 4.493717  | -5.202524 | -2.494257 |
| H  | 4.217931  | -5.035238 | -0.342820 |
| C  | 3.932247  | -3.229075 | -3.810297 |
| H  | 3.221640  | -1.502937 | -2.686396 |
| C  | 4.391741  | -4.556594 | -3.740012 |
| H  | 4.860764  | -6.239186 | -2.437920 |
| H  | 3.859652  | -2.719064 | -4.783525 |
| H  | 4.679022  | -5.088912 | -4.660280 |
| C  | 1.354113  | -2.814239 | 0.365760  |
| C  | 0.692960  | -2.366788 | 1.534240  |
| C  | 0.628079  | -3.501118 | -0.628350 |
| C  | -0.679051 | -2.605200 | 1.700843  |
| H  | 1.252833  | -1.814325 | 2.306701  |
| C  | -0.748187 | -3.736317 | -0.452848 |
| H  | 1.134026  | -3.845350 | -1.543696 |
| C  | -1.403870 | -3.288736 | 0.706509  |
| H  | -1.196188 | -2.248177 | 2.604184  |
| H  | -1.311600 | -4.274708 | -1.231121 |
| H  | -2.481997 | -3.463354 | 0.840421  |
| Au | 3.052313  | 0.014119  | -0.054976 |
| H  | 4.608660  | 4.570888  | -1.387867 |
| N  | 4.185778  | 5.888686  | 0.947696  |
| C  | 4.888298  | 6.693026  | -0.050671 |
| H  | 5.130714  | 7.680931  | 0.379840  |
| H  | 5.841276  | 6.215241  | -0.366263 |
| H  | 4.262230  | 6.855181  | -0.954937 |
| C  | 3.920011  | 6.462929  | 2.266229  |
| H  | 4.365897  | 5.847159  | 3.076884  |
| H  | 4.366314  | 7.471736  | 2.322273  |
| H  | 2.828660  | 6.556223  | 2.456659  |
| C  | 0.350293  | 1.246886  | -2.114215 |
| C  | 0.247285  | -0.295672 | -2.100555 |
| H  | -0.649930 | -0.661436 | -1.563225 |
| H  | 0.197460  | -0.675107 | -3.141207 |
| H  | 1.133049  | -0.757501 | -1.616747 |
| C  | -0.982980 | 1.800088  | -2.700487 |
| H  | -1.215645 | 1.274201  | -3.649524 |
| H  | -1.828774 | 1.625884  | -2.001080 |
| H  | -0.927046 | 2.886070  | -2.907385 |
| C  | 1.476801  | 1.573428  | -3.119128 |
| H  | 1.192116  | 1.185615  | -4.118910 |
| H  | 1.669838  | 2.654411  | -3.237663 |
| H  | 2.420282  | 1.070645  | -2.824665 |

[(PPh<sub>3</sub>)Au(*para*-aniline)--(PPh<sub>3</sub>)Au(alkene)+benzene]<sup>+</sup>  
-2135.55942022 A.U.

|   |           |           |           |
|---|-----------|-----------|-----------|
| P | 2.901073  | 0.297087  | 0.058005  |
| C | -4.179999 | -0.173641 | -1.016118 |
| C | -3.270003 | -0.763120 | -0.112218 |
| C | -5.486586 | 0.130411  | -0.606055 |
| C | -3.705287 | -1.074632 | 1.194241  |
| C | -5.913196 | -0.161714 | 0.700979  |
| H | -6.177515 | 0.601171  | -1.322490 |
| C | -5.017207 | -0.776384 | 1.591609  |
| H | -3.030765 | -1.557176 | 1.911638  |
| H | -6.942446 | 0.068213  | 1.016567  |
| H | -5.339635 | -1.030064 | 2.613449  |
| C | 2.645118  | -1.485450 | -0.331455 |
| C | 2.652948  | -2.461309 | 0.687189  |
| C | 2.242326  | -1.842554 | -1.640556 |
| C | 2.253736  | -3.779546 | 0.399529  |
| H | 2.964616  | -2.189846 | 1.708180  |
| C | 1.851940  | -3.161608 | -1.921342 |
| H | 2.235522  | -1.083917 | -2.440453 |
| C | 1.848871  | -4.130240 | -0.899642 |
| H | 2.260633  | -4.536625 | 1.199018  |
| H | 1.545199  | -3.435073 | -2.943072 |
| H | 1.536685  | -5.162281 | -1.120558 |
| C | 3.794407  | 0.332526  | 1.658077  |



---

|    |           |           |           |
|----|-----------|-----------|-----------|
| C  | 5.158415  | -0.027235 | 1.736716  |
| C  | 3.091444  | 0.690146  | 2.829373  |
| C  | 5.807565  | -0.033922 | 2.981259  |
| H  | 5.717737  | -0.293289 | 0.826077  |
| C  | 3.747080  | 0.678253  | 4.072527  |
| H  | 2.031245  | 0.985945  | 2.763102  |
| C  | 5.103310  | 0.316314  | 4.148761  |
| H  | 6.871786  | -0.310310 | 3.040103  |
| H  | 3.197532  | 0.961436  | 4.983643  |
| H  | 5.618044  | 0.313203  | 5.122247  |
| C  | 4.044611  | 0.940277  | -1.217222 |
| C  | 5.011156  | 0.116297  | -1.836917 |
| C  | 3.972678  | 2.312814  | -1.544138 |
| C  | 5.904999  | 0.669449  | -2.768810 |
| H  | 5.057910  | -0.958693 | -1.600297 |
| C  | 4.872734  | 2.858728  | -2.473921 |
| H  | 3.207908  | 2.950061  | -1.069842 |
| C  | 5.838711  | 2.038772  | -3.084893 |
| H  | 6.656814  | 0.026420  | -3.252387 |
| H  | 4.815631  | 3.928819  | -2.726695 |
| H  | 6.540613  | 2.468048  | -3.816788 |
| Au | 0.755665  | 1.201555  | 0.063888  |
| H  | -3.872850 | 0.081708  | -2.037867 |
| N  | -1.877582 | -0.914017 | -0.478211 |
| C  | -1.581249 | -1.096569 | -1.914756 |
| H  | -0.484728 | -1.188852 | -2.026509 |
| H  | -2.072653 | -2.006335 | -2.311974 |
| H  | -1.909636 | -0.206376 | -2.483449 |
| C  | -1.054828 | -1.782089 | 0.393665  |
| H  | -1.464837 | -2.808408 | 0.450677  |
| H  | -0.031417 | -1.820530 | -0.018697 |
| H  | -0.992479 | -1.340652 | 1.406901  |
| C  | -3.263107 | 2.549670  | 1.240195  |
| C  | -3.815877 | 3.132639  | 0.054908  |
| C  | -2.046992 | 1.878294  | 1.203887  |
| C  | -3.028497 | 3.063117  | -1.140834 |
| C  | -1.283031 | 1.710419  | -0.002647 |
| H  | -1.684025 | 1.411918  | 2.134536  |
| C  | -1.820844 | 2.374214  | -1.159261 |
| H  | -3.386362 | 3.525500  | -2.070350 |
| H  | -1.414435 | 0.364761  | -0.245855 |
| H  | -1.271680 | 2.315181  | -2.113857 |
| H  | -3.811363 | 2.595896  | 2.189852  |
| N  | -5.061528 | 3.706190  | 0.057532  |
| C  | -5.883579 | 3.663661  | 1.261881  |
| H  | -6.862448 | 4.132475  | 1.055206  |
| H  | -6.063011 | 2.614464  | 1.590478  |
| H  | -5.414078 | 4.217263  | 2.104361  |
| C  | -5.615177 | 4.270943  | -1.168377 |
| H  | -5.732915 | 3.500801  | -1.964491 |
| H  | -6.612250 | 4.697680  | -0.957824 |
| H  | -4.977171 | 5.088109  | -1.569754 |
| C  | -3.582992 | -4.484109 | 0.819822  |
| C  | -2.405254 | -5.197556 | 1.110402  |
| C  | -3.859978 | -4.088429 | -0.501772 |
| C  | -1.498447 | -5.509014 | 0.079121  |
| C  | -2.961226 | -4.414742 | -1.533708 |
| C  | -1.776620 | -5.118169 | -1.243171 |
| H  | -2.192742 | -5.513292 | 2.144034  |
| H  | -4.777216 | -3.521539 | -0.724544 |
| H  | -0.575919 | -6.065311 | 0.308061  |
| H  | -3.192534 | -4.132648 | -2.573668 |
| H  | -1.073445 | -5.370229 | -2.052703 |
| H  | -4.289637 | -4.231468 | 1.625562  |

**[(PPh<sub>3</sub>)Au(alkene)--(aniline)+benzene]<sup>+</sup>**

-3250.16478305 A.U.

|   |           |           |           |
|---|-----------|-----------|-----------|
| P | 4.306793  | -0.911268 | -0.127151 |
| H | -0.464414 | -0.207780 | -1.335825 |
| C | 0.293441  | 0.594350  | -1.237423 |
| C | 0.159730  | 1.373625  | 0.005984  |
| C | 1.447000  | 3.434409  | -0.741535 |
| C | 1.059356  | 2.529186  | 0.273446  |
| C | 2.317906  | 4.499361  | -0.457860 |

---

|    |           |           |           |
|----|-----------|-----------|-----------|
| C  | 1.566293  | 2.726479  | 1.580457  |
| C  | 2.822413  | 4.676905  | 0.843133  |
| H  | 2.613008  | 5.190889  | -1.262830 |
| C  | 2.446833  | 3.781017  | 1.862514  |
| H  | 1.274251  | 2.023122  | 2.377248  |
| H  | 3.511070  | 5.507738  | 1.063188  |
| H  | 2.844463  | 3.906587  | 2.881947  |
| C  | 5.484543  | 0.483250  | -0.392655 |
| C  | 6.864971  | 0.292171  | -0.616791 |
| C  | 4.960506  | 1.797877  | -0.353950 |
| C  | 7.711222  | 1.402624  | -0.778275 |
| H  | 7.286817  | -0.721533 | -0.683562 |
| C  | 5.815276  | 2.901599  | -0.501012 |
| H  | 3.878470  | 1.967797  | -0.225060 |
| C  | 7.191535  | 2.707548  | -0.712065 |
| H  | 8.785737  | 1.243961  | -0.959798 |
| H  | 5.390012  | 3.916270  | -0.462079 |
| H  | 7.859860  | 3.573780  | -0.837629 |
| C  | 5.062042  | -2.446782 | -0.773497 |
| C  | 6.215324  | -3.027295 | -0.193652 |
| C  | 4.454201  | -3.065208 | -1.888680 |
| C  | 6.755303  | -4.205264 | -0.734761 |
| H  | 6.683710  | -2.566860 | 0.690787  |
| C  | 5.000431  | -4.243099 | -2.426117 |
| H  | 3.547011  | -2.617793 | -2.327488 |
| C  | 6.150711  | -4.811868 | -1.851537 |
| H  | 7.652567  | -4.653813 | -0.280510 |
| H  | 4.524253  | -4.719159 | -3.297366 |
| H  | 6.577555  | -5.735540 | -2.272707 |
| C  | 4.187343  | -1.112247 | 1.706288  |
| C  | 3.875075  | 0.034360  | 2.472602  |
| C  | 4.223383  | -2.375920 | 2.333717  |
| C  | 3.604049  | -0.085710 | 3.844075  |
| H  | 3.831642  | 1.026359  | 1.996642  |
| C  | 3.951314  | -2.489197 | 3.709327  |
| H  | 4.454559  | -3.281330 | 1.752748  |
| C  | 3.638115  | -1.347756 | 4.466862  |
| H  | 3.364608  | 0.814796  | 4.431545  |
| H  | 3.982676  | -3.480118 | 4.188626  |
| H  | 3.423788  | -1.440336 | 5.542948  |
| Au | 2.180062  | -0.306505 | -0.865693 |
| H  | 0.348862  | 1.192420  | -2.168450 |
| H  | -0.009965 | 0.758715  | 0.905341  |
| H  | 1.066124  | 3.297163  | -1.763643 |
| P  | -3.046412 | -1.822461 | 0.210302  |
| C  | -1.545383 | 4.530930  | 1.239370  |
| C  | -1.519466 | 5.212237  | -0.023955 |
| C  | -1.648669 | 3.149418  | 1.291324  |
| C  | -1.691214 | 4.418108  | -1.210804 |
| C  | -1.736645 | 2.325732  | 0.118184  |
| H  | -1.612137 | 2.662358  | 2.280107  |
| C  | -1.791503 | 3.038532  | -1.125222 |
| H  | -1.708581 | 4.894219  | -2.200304 |
| H  | -1.864299 | 2.459573  | -2.061423 |
| C  | -3.771735 | -2.447274 | -1.352855 |
| C  | -4.809134 | -3.400733 | -1.378601 |
| C  | -3.306423 | -1.881004 | -2.562357 |
| C  | -5.376998 | -3.783154 | -2.607462 |
| H  | -5.187351 | -3.834658 | -0.440092 |
| C  | -3.866525 | -2.277474 | -3.785585 |
| H  | -2.515183 | -1.113292 | -2.540597 |
| C  | -4.907640 | -3.225619 | -3.809506 |
| H  | -6.194356 | -4.520852 | -2.623077 |
| H  | -3.500234 | -1.834371 | -4.724800 |
| H  | -5.357114 | -3.525997 | -4.768817 |
| C  | -3.939876 | -2.634110 | 1.582106  |
| C  | -3.711319 | -3.993135 | 1.894628  |
| C  | -4.883138 | -1.885365 | 2.316859  |
| C  | -4.439644 | -4.600440 | 2.930008  |
| H  | -2.961783 | -4.570776 | 1.329746  |
| C  | -5.608777 | -2.500662 | 3.351005  |
| H  | -5.041733 | -0.824290 | 2.067845  |
| C  | -5.389629 | -3.856135 | 3.655405  |
| H  | -4.263703 | -5.659554 | 3.175059  |

|    |           |           |           |
|----|-----------|-----------|-----------|
| H  | -6.345195 | -1.917124 | 3.925335  |
| H  | -5.957706 | -4.335804 | 4.467903  |
| C  | -1.327093 | -2.505938 | 0.270854  |
| C  | -0.790407 | -3.333298 | -0.735847 |
| C  | -0.506115 | -2.093623 | 1.347764  |
| C  | 0.556960  | -3.735902 | -0.667302 |
| H  | -1.418020 | -3.658070 | -1.580155 |
| C  | 0.832291  | -2.504616 | 1.417166  |
| H  | -0.919225 | -1.431414 | 2.126992  |
| C  | 1.367281  | -3.323749 | 0.402945  |
| H  | 0.976319  | -4.373088 | -1.461486 |
| H  | 1.471815  | -2.170671 | 2.248733  |
| H  | 2.422876  | -3.632434 | 0.441623  |
| Au | -2.707826 | 0.465310  | 0.242801  |
| H  | -1.453968 | 5.093889  | 2.177287  |
| N  | -1.315027 | 6.562300  | -0.097849 |
| C  | -1.052790 | 7.336577  | 1.114043  |
| H  | -0.858962 | 8.389138  | 0.840681  |
| H  | -1.920602 | 7.319275  | 1.808924  |
| H  | -0.162040 | 6.950569  | 1.655683  |
| C  | -1.272470 | 7.234535  | -1.394252 |
| H  | -2.220905 | 7.097520  | -1.956952 |
| H  | -1.125587 | 8.318456  | -1.240258 |
| H  | -0.435780 | 6.859067  | -2.024561 |
| C  | -5.336164 | 1.091990  | -1.996740 |
| C  | -6.037862 | -0.077084 | -1.650162 |
| C  | -5.229278 | 2.150268  | -1.075216 |
| C  | -6.627063 | -0.190727 | -0.379356 |
| C  | -5.824905 | 2.039213  | 0.195452  |
| C  | -6.523776 | 0.868751  | 0.542124  |
| H  | -6.113945 | -0.907420 | -2.368788 |
| H  | -4.664158 | 3.057902  | -1.337924 |
| H  | -7.166811 | -1.110473 | -0.103856 |
| H  | -5.734850 | 2.865308  | 0.917883  |
| H  | -6.996672 | 0.784560  | 1.533873  |
| H  | -4.863169 | 1.173358  | -2.988154 |

**[(PPh<sub>3</sub>)Au(benzene)]<sup>+</sup>**

-1713.06179991 A.U.

|   |           |           |           |
|---|-----------|-----------|-----------|
| P | -0.544964 | -1.153375 | 0.010672  |
| H | 0.469093  | 3.685526  | 0.889018  |
| C | 1.178547  | 3.052729  | 0.329822  |
| C | 2.082429  | 2.236878  | 1.023824  |
| C | 3.597906  | 1.514053  | -0.880743 |
| C | 3.271209  | 1.541442  | 0.499223  |
| C | 4.707769  | 0.791098  | -1.331135 |
| C | 4.089168  | 0.827579  | 1.410040  |
| C | 5.515153  | 0.086050  | -0.414531 |
| H | 4.950271  | 0.772591  | -2.404705 |
| C | 5.205644  | 0.107737  | 0.956645  |
| H | 3.841001  | 0.837041  | 2.483764  |
| H | 6.388558  | -0.479883 | -0.774281 |
| H | 5.835508  | -0.437794 | 1.675997  |
| C | 0.801698  | -2.285998 | -0.494575 |
| C | 0.515445  | -3.458873 | -1.231131 |
| C | 2.132853  | -1.992095 | -0.124825 |
| C | 1.557720  | -4.332927 | -1.581393 |
| H | -0.517201 | -3.680553 | -1.544472 |
| C | 3.167779  | -2.871931 | -0.479156 |
| H | 2.368178  | -1.068556 | 0.427893  |
| C | 2.882000  | -4.041892 | -1.205181 |
| H | 1.334123  | -5.244510 | -2.156999 |
| H | 4.202352  | -2.629443 | -0.192184 |
| H | 3.695639  | -4.728266 | -1.486980 |
| C | -1.819405 | -1.260067 | -1.303060 |
| C | -3.182719 | -1.437428 | -0.989528 |
| C | -1.421708 | -1.048558 | -2.643885 |
| C | -4.144805 | -1.393408 | -2.014636 |
| H | -3.494236 | -1.611874 | 0.052399  |
| C | -2.387576 | -1.015378 | -3.661302 |
| H | -0.355818 | -0.914090 | -2.890527 |
| C | -3.750411 | -1.180834 | -3.346784 |
| H | -5.209015 | -1.530734 | -1.768363 |
| H | -2.076373 | -0.857608 | -4.705603 |

---

|    |           |           |           |
|----|-----------|-----------|-----------|
| H  | -4.506877 | -1.148208 | -4.146052 |
| C  | -1.318528 | -1.813598 | 1.533198  |
| C  | -1.420781 | -3.205975 | 1.746303  |
| C  | -1.868655 | -0.912622 | 2.472771  |
| C  | -2.079317 | -3.688486 | 2.889008  |
| H  | -0.979193 | -3.914587 | 1.028328  |
| C  | -2.530732 | -1.403831 | 3.610129  |
| H  | -1.774888 | 0.174381  | 2.314349  |
| C  | -2.637591 | -2.790632 | 3.817592  |
| H  | -2.154322 | -4.774048 | 3.056588  |
| H  | -2.958460 | -0.700183 | 4.340990  |
| H  | -3.152238 | -3.174574 | 4.712064  |
| Au | 0.201149  | 1.042649  | 0.253349  |
| H  | 1.351032  | 3.342041  | -0.720582 |
| H  | 1.970185  | 2.187566  | 2.123601  |
| H  | 2.966684  | 2.047508  | -1.607932 |
| C  | -2.669399 | 3.033297  | 1.058999  |
| C  | -2.667222 | 2.013106  | 0.087709  |
| C  | -2.213329 | 4.321058  | 0.722178  |
| C  | -2.197199 | 2.278112  | -1.218739 |
| C  | -1.751083 | 4.588497  | -0.581233 |
| C  | -1.737222 | 3.567917  | -1.549373 |
| H  | -3.064884 | 1.014906  | 0.326701  |
| H  | -2.230566 | 5.125046  | 1.474822  |
| H  | -2.224684 | 1.481759  | -1.978402 |
| H  | -1.406529 | 5.601007  | -0.844118 |
| H  | -1.384083 | 3.779396  | -2.570840 |
| H  | -3.045355 | 2.827376  | 2.073497  |

-1403.59323160 A.U.

|    |           |           |           |
|----|-----------|-----------|-----------|
| P  | 0.903515  | 0.001766  | -0.044688 |
| C  | -4.456774 | -0.690503 | -1.068751 |
| C  | -4.464457 | 0.724094  | -1.055175 |
| C  | -3.982476 | -1.409395 | 0.035883  |
| C  | -3.997144 | 1.427196  | 0.062516  |
| C  | -3.511979 | -0.714550 | 1.187180  |
| H  | -3.992193 | -2.509647 | 0.035209  |
| C  | -3.519616 | 0.716680  | 1.199999  |
| H  | -4.018688 | 2.527104  | 0.081124  |
| H  | -3.295873 | 1.261796  | 2.132045  |
| C  | 2.006966  | 0.012901  | 1.411774  |
| C  | 3.184513  | 0.791192  | 1.418502  |
| C  | 1.694957  | -0.818815 | 2.511086  |
| C  | 4.047004  | 0.731153  | 2.526788  |
| H  | 3.426086  | 1.442335  | 0.564008  |
| C  | 2.564545  | -0.874541 | 3.610804  |
| H  | 0.772216  | -1.422743 | 2.504192  |
| C  | 3.739548  | -0.099190 | 3.619082  |
| H  | 4.964507  | 1.339573  | 2.535712  |
| H  | 2.322547  | -1.521923 | 4.467740  |
| H  | 4.417512  | -0.140006 | 4.485721  |
| C  | 1.327905  | 1.466577  | -1.053216 |
| C  | 2.174835  | 1.351578  | -2.176583 |
| C  | 0.842940  | 2.732091  | -0.651845 |
| C  | 2.536076  | 2.506588  | -2.891878 |
| H  | 2.550493  | 0.366097  | -2.493509 |
| C  | 1.213201  | 3.879153  | -1.370101 |
| H  | 0.178565  | 2.817361  | 0.224190  |
| C  | 2.059119  | 3.766532  | -2.489882 |
| H  | 3.194914  | 2.418896  | -3.769560 |
| H  | 0.837549  | 4.865776  | -1.057774 |
| H  | 2.344541  | 4.667593  | -3.054710 |
| C  | 1.332639  | -1.472561 | -1.036871 |
| C  | 2.543385  | -2.163455 | -0.818300 |
| C  | 0.455141  | -1.877607 | -2.068322 |
| C  | 2.872636  | -3.258534 | -1.636092 |
| H  | 3.225199  | -1.849072 | -0.012844 |
| C  | 0.796077  | -2.967782 | -2.882901 |
| H  | -0.493093 | -1.338196 | -2.231378 |
| C  | 2.003530  | -3.658966 | -2.665999 |
| H  | 3.815087  | -3.801371 | -1.465310 |
| H  | 0.114785  | -3.284454 | -3.687690 |
| H  | 2.265476  | -4.518395 | -3.302512 |
| Au | -1.316198 | -0.009090 | 0.559170  |

---

|   |           |           |           |
|---|-----------|-----------|-----------|
| H | -4.837334 | -1.229780 | -1.949903 |
| H | -4.849993 | 1.276097  | -1.926209 |
| H | -3.290807 | -1.274470 | 2.111146  |

**benzene**

-232.082637612 A.U.

|   |           |           |           |
|---|-----------|-----------|-----------|
| C | -0.290786 | 1.376435  | -0.000019 |
| C | 1.046685  | 0.939999  | -0.000080 |
| C | -1.337522 | 0.436397  | 0.000149  |
| C | 1.337497  | -0.436320 | -0.000084 |
| C | -1.046627 | -0.940043 | -0.000114 |
| H | -2.384961 | 0.778260  | -0.000092 |
| C | 0.290726  | -1.376485 | 0.000188  |
| H | 2.384898  | -0.778385 | 0.000254  |
| H | 0.518730  | -2.454469 | -0.000016 |
| H | -0.518345 | 2.454544  | 0.000242  |
| H | 1.866377  | 1.676411  | -0.000154 |
| H | -1.866541 | -1.676261 | -0.000477 |
